# Supplementary material for: Intraspecific phylogeny and genomic resources development for an important medical plant Dioscorea nipponica, based on low-coverage whole genome sequencing data
Source: Front Plant Sci. 2023 Dec 12;14:1320473. doi: 10.3389/fpls.2023.1320473 (PMC10749966; doi:10.3389/fpls.2023.1320473)
Supplement: Supplementary file 2 [file Table_2.xlsx]

## Sheet: Sheet1
Table S2 Plastome-derived SSRs in the eight diverse accessions of Discorea nipponica
Type	Length	BJ	GS	HeN	HuN	JN	ZJ	FD	NI
A/T	10	22	23	22	22	22	22	30	26
	11	13	13	13	13	13	13	9	14
	12	3	3	3	2	3	3	2	2
	13	2	2	2	2	2	2	1	1
	16							1	1
	18	1	1	1	1	1	1
C/G	12					1			1
	13	1		1
	14							1	1
	15		1		1
	16							1
	19						1
AG/CT	10	3	3	3	3	3	3	3	3
AT/AT	10	7	7	7	7	6	7	8	8
	12							1	1
	14	1	1	1	1	2	1
	16	3	3	3	3	3	3	3	4
	18		1		1	1	1
	20	1		1				1
AAG/CTT	12	3	3	3	3	3	3	3	3
AGG/CCT	12	1	1	1	1	1	1	1	1
AAAC/GTTT	12	1	1	1	1	1	1	1	1
AAAT/ATTT	12	3	3	3	3	3	3	3	3
AAGC/CTTG	12	1	1	1	1	1	1	1	1
AATG/ATTC	12	1	1	1	1	1	1	1	1
AATT/AATT	12	1	1	1	1	1	1	1	1
AGAT/ATCT	12	3	3	3	3	3	3	3	3
AAAAT/ATTTT	15	1	1	1	2	1		1	1
AAATC/ATTTG	15	1	1	1	1	1	1	1	1
AATAG/ATTCT	15	1	1	1	1	1	1	1	1
AATAT/ATATT	15	1	1	1	1	1	1
AGCGC/CGCTG	15	1	1	1	1	1	1	1	1
AAATAT/ATATTT	18	1	1	1	1	1	1	1	1
ATATCC/ATATGG	18	2	2	2	2	2	2	2	2
