# Supplementary material for: Intraspecific phylogeny and genomic resources development for an important medical plant Dioscorea nipponica, based on low-coverage whole genome sequencing data
Source: Front Plant Sci. 2023 Dec 12;14:1320473. doi: 10.3389/fpls.2023.1320473 (PMC10749966; doi:10.3389/fpls.2023.1320473)
Supplement: Supplementary file 4 [file Table_4.xlsx]

## Sheet: Sheet1
Table S4 Polymorphic nuclear SSRs across eight Dioscorea nipponica accessions
SSRID	Type	BJ	GS	HeN	HuN	JN	ZJ	FD	NI	Std_dev	MissingRate	Transferability (Similarity)	Upstream_200bp	Downstream_200bp	Forward primer1 (5'->3')	Tm (centigrade)	Size (bp)	Average identity (%)	Average coverage (%)	Reverse primer1 (5'->3')	Tm (centigrade)	Size (bp)	Average identity (%)	Average coverage (%)	Product1 size (bp)	Start	End	Forward primer2 (5'->3')	Tm (centigrade)	Size (bp)	Average identity (%)	Average coverage (%)	Reverse primer2 (5'->3')	Tm (centigrade)	Size (bp)	Average identity (%)	Average coverage (%)	Product2 size (bp)	Start	End	Forward primer3 (5'->3')	Tm (centigrade)	Size (bp)	Average identity (%)	Average coverage (%)	Reverse primer3 (5'->3')	Tm (centigrade)	Size (bp)	Average identity (%)
nSSR_1	AAAAAT	5|C6072622:321-750|+	3|C6218549:564-581|+	N/A	N/A	5|C5862926:410-439|-	3|C5978630:228-245|+	N/A	3|C5697263:345-362|-	0.98	0.38	1	TTGCAACCTTTACCGACTTCTCTCACTCATTAATCGAGACTTGTGTTGATCCCCAAAAGGAGTATATCTCAACATCAATATAAATAGATATATAAGATAATAAATTCTTAGAGTGTTGATTACACTATTATTCTGAATAATAAGCACAAAACAACCAAAATATACCTTTAGTATGTGACAATAAACTATAAGATGACATG	AGTTAGGTTTCACCCCCTTATGACTAACACACAAGGCTTGGGTAAACAACTCATAATAGATAACAAAAGGAAAGCACAAAATGAACACGGGTCATCTCATCTGATAAACGCTTACGAAGACCACAAAAGATGAACTCCTGACTATCTTATGCATGTCCTTAAATGATCATGGCAACATTTATACTTTACACAAATGGTTA	Primers not available
nSSR_100	AAC	7|C6179246:491-911|+	9|C6218179:570-596|+	N/A	N/A	8|C6045949:343-366|+	9|C6369640:182-208|+	6|C6908810:245-262|-	N/A	1.17	0.38	0.99	AAACTAAGGCCGGTGGAAGTTTGTGTAGAATGGCCAAAGAATGAAGAAGAGATCAATTCCATCATTTCAATTATCCACATATATCTTCAACCAACACATGAATGGAAAAGATAGAAACCGAAAAAGCACCCATCCAAGAATAGCACTAAATTATCAAAAGCTAGAAATGGTTTATATACACCTATCTATTTTACAACAAT	ATAGATATGGACAGATTAATGTTAATACACTATTGGGATATGCATCCAATAATATATTCTTCAAGAAAATTTATTCACCTTGATTGCATGGGAAAAGTGCACTCCGGTAAGCATGTGCTGAGAACCACAATGGATAGGTAGGAGGATCTTGCTTAACATACACCTCCTTCCACATCTTATCCTTCCGACCATATGTCAAC	GCACCCATCCAAGAATAGCAC	59.322	21	100	100	GAGTGCACTTTTCCCATGCA	59.039	20	100	100	200	325	524	GCACCCATCCAAGAATAGCA	57.943	20	100	100	GAGTGCACTTTTCCCATGCA	59.039	20	100	100	200	325	524	CACCCATCCAAGAATAGCACT	57.712	21	100	100	GGAGTGCACTTTTCCCATGC	59.755	20	100
nSSR_1000	CA	8|C6102680:557-972|+	6|C5946002:345-356|+	N/A	6|C5233518:260-271|+	N/A	7|C6373146:526-539|+	6|C6791109:278-289|+	N/A	0.8	0.38	0.99	ATAGCTCAACATTAGGAACCAAGCCAGTCTCAGCCACCTACAAACATGCACACCTTCTCTTCTTCCTTAAGAATATGCATATATTCAACCTGCATACCAGCCGAGCCTCAACACTCTTGACCTTAAATATCACCAACCCCCCATCTCTAACCCTAACATAAAATCATAGTTACAAACTTAAATCAACTCCTGAACACCAG	CTGATCTTCAAGTCATCACTCTAACTTATCAATATTTAATCCACCAGGAATCCAAACTCCCACCTGTAGGCATAGAGACACTCACAAACTCTTACCTCAGTCCACAAACCACTAATTATCAATTTAAAGACAAAGTACCAAAGCTTTCAAACCCCAACAACTATAAGAAGCACCTCTAACCTCTCCATGGTTCAGGCCTC	CCGAGCCTCAACACTCTTGA	59.682	20	100	100	GCCTACAGGTGGGAGTTTGG	60.323	20	100	100	187	300	486	CCGAGCCTCAACACTCTTGA	59.682	20	100	100	TGCCTACAGGTGGGAGTTTG	59.6	20	100	100	188	300	487	CATACCAGCCGAGCCTCAAC	60.812	20	100	100	GCCTACAGGTGGGAGTTTGG	60.323	20	100
nSSR_1001	CA	8|C6127403:111-526|+	5|C6065680:236-245|+	8|C5279312:360-375|+	8|C5180944:446-461|+	9|C6067185:805-822|-	N/A	N/A	8|C5560881:368-383|+	1.25	0.25	0.98	ATTTAAATATTCAATATCTTCATAGTGATATGTGTGATGCTCTAACACTTCATACCATTAAATGGGTTAGCATACATGGGAATAACGGAGATTTGTAACATGAACTCCAGTTTAGTTCTATATTGTCTATGTTATGAGCTTTTCTAAAGAGTATATCTTTTGTTTTAGCTGAAGGTCTCTATCCCACTCCTTCCCACCTT	AAAAACAAAACTTCTTTCTACAATTCCATACTTGAACTTCCCCACTTTTTGCCTACAAGTGGATATAAATTCTTAATCATTTTTACCCTTAAATGAATTATGCTACATACTTCATGTAATCAATGCCCTTCCATAATATCTATTTAATACAATTTCATGACATTTATCCAAATTCCCCAGCTTGCTGGTCAGATTAAGTA	ATCCCACTCCTTCCCACCTT	60.179	20	100	100	TGGAAGGGCATTGATTACATGA	57.752	22	100	100	169	290	458	ATCCCACTCCTTCCCACCTT	60.179	20	100	100	TGGAAGGGCATTGATTACATGAAG	59.354	24	100	100	169	290	458	ATCCCACTCCTTCCCACCTT	60.179	20	100	100	GGAAGGGCATTGATTACATGAAGT	59.354	24	100
nSSR_1002	CA	8|C6131647:395-810|+	7|C6160995:757-770|+	7|C5226511:290-303|+	N/A	N/A	7|C6348532:612-625|+	7|C7120744:758-771|+	N/A	0.4	0.38	1	AACACACATAAATCCAGGCCTGCACACACCTTCAAAACATCATCCCATGTACTTAAGCATACCAAGCCTCTACCTGTGCACCCACATTCACTCCTCAGTGAATCCATTCACTGCCTTCATTCATCTCCAAGCACCATCCTCAATATACTCACAAAAAATCATAGTCACCTTTGCACACCTGCACACCTTAGAAACCATCC	CTCATAGGTAAACCTCCATCCCTGAAGACAGTAAAAATCAAACCATCAAACCTCCCATTCTCCATTTCCAGAACCCCATACACAAATCCAACACAATTTCACTGCCAGAGATCAACACATATTCATCTACTTCCATCTATGAATTAGAAAACAAACACTTCTCAAAGCTTCAGCAGCCAACATGCACTCATTACTAAAAC	GCACCCACATTCACTCCTCA	59.963	20	100	100	ACTGTCTTCAGGGATGGAGGT	60.203	21	100	100	171	277	447	TGCACCCACATTCACTCCTC	59.963	20	100	100	ACTGTCTTCAGGGATGGAGGT	60.203	21	100	100	172	276	447	GTGCACCCACATTCACTCCT	60.251	20	100	100	ACTGTCTTCAGGGATGGAGGT	60.203	21	100
nSSR_1005	CA	8|C6206416:128-543|+	7|C6235737:2012-2025|-	N/A	8|C5270588:198-213|-	8|C5549472:198-213|-	9|C6296736:666-683|+	6|C7138182:529-540|-	N/A	0.94	0.25	0.99	TTAGACCTCATCTTCTGTATTTTCACCTGCAAACACAACATTCGAATGTCTTGAAGAGAAAATAGAAGATATTAACTCCAATTTTTTTGCTGCAATCATAGTATCTTATTCTTACCTCCAGTTTTCTGGACTGTGCTTCTGCCTTCGCATTCTGAAGGTTTACCCAAGCTTGAATCTTTGCTTCTTCTCTCTGATATCTG	CGAAAAGAACATTAAGCAGCTATTTTACCCAATGTTTTCAAATTTCAGGTAAATTACCTGAAGCAGCTCTTGGTTTTCTCCTCATCTTCCCATGCAGATGCTCTGGATTCAGCAACACTCTTCCTTCCAGCACTAATCTCAAAATGCCTCAAACTCTTGGATATCTCCTCTTCCTCCTCTTCCCTTGAGTTCCAATTTGA	GCTTCTGCCTTCGCATTCTG	59.902	20	100	100	AACCAAGAGCTGCTTCAGGT	59.524	20	100	100	157	261	417	GTGCTTCTGCCTTCGCATTC	60.179	20	100	100	AACCAAGAGCTGCTTCAGGT	59.524	20	100	100	159	259	417	TGGACTGTGCTTCTGCCTTC	60.25	20	99	100	AACCAAGAGCTGCTTCAGGT	59.524	20	100
nSSR_1006	CA	8|C6215552:607-1022|+	N/A	N/A	8|C5397500:481-496|-	8|C6066743:1586-1601|-	N/A	11|C7139904:599-620|-	9|C5749475:840-857|-	1.17	0.38	1	CATATTTTCAAAGGTTCAGTTCATTTAATATGTTTTGTTTCTTTCTATTCAAAGTGATCTCCTTTTGTAAGCTTATTCTTGCTTATCTTTCTAAAATTTTGAGGTTTTGGTATTAATATTGCTTTATTCGATTTTTCTATTGTAAAAAGTACAATTGATTGGAATTAGGAAAGAACAACCATTTCCTGAGTTAAATATAC	ACCCATATTAGAATTGGCATTAGAACAAATACTAAGTATCTCTCATAATGCAGAAAGAAGCTAAATAATTGTCCATTGTAGATTCACAATAAAGTTCCATTGGATTTGCGAACATCTTATATTGGTGTAACTTTCCTGAAGGATTTTCCAGTTTATGTTAATCTTCATTTCTGAAATCAAAGGCAATAGTGAAGGGCCAA	GGAAAGAACAACCATTTCCTGAGT	59.415	24	100	100	TGTTCGCAAATCCAATGGAACT	59.11	22	100	100	163	367	529	GGAAAGAACAACCATTTCCTGAGT	59.415	24	100	100	TGTTCGCAAATCCAATGGAAC	57.704	21	100	100	163	367	529	GGAAAGAACAACCATTTCCTGAGT	59.415	24	100	100	AGATGTTCGCAAATCCAATGGA	58.645	22	100
nSSR_1008	CA	9|C5990822:278-695|+	9|C6198735:459-476|-	N/A	N/A	9|C5793413:196-213|+	8|C6356388:900-915|-	9|C7012682:453-470|+	9|C5713055:825-842|+	0.37	0.25	0.99	TCCCAATTGATCTGATACTTCTTATAAGATCCATCACAGCCCTTGGTTATCTCCATTGGTTGGCCTAGATTGATTCATGAGCCAGCCAAATGGTTATGGTCCCTTCTCTTTCTCTTTCTATATATCACTACCATGGCTAGTAAACTCCTTCCATCAATAAAATTCTCTTCTTTCTTCTCCTTCCTTCCTATTATTGTGAT	ACAGTAACACATATCTCATGTGTTCATCCACCCTTCATATCTCACTCTTATAATTCGATCCCAACTCTCAACTACGACGAAACCATGGCCGCGGAGAATGTAATCGAAGGGCACCCTATGCTTCCTCCATTAAGGATTTCATCGGTGGTCTCGATCAACAACGAAGAATGTATCACACCGAAGACCGAAGAACACATCCT	TCATGAGCCAGCCAAATGGT	59.96	20	100	100	AGGGTGGATGAACACATGAGA	58.731	21	100	100	178	274	451	TCATGAGCCAGCCAAATGGT	59.96	20	100	100	TGAAGGGTGGATGAACACATGA	59.625	22	100	100	181	274	454	TCATGAGCCAGCCAAATGGT	59.96	20	100	100	AAGGGTGGATGAACACATGAGA	59.356	22	100
nSSR_1011	CA	9|C6088576:65-482|+	9|C6063368:201-218|+	7|C5147875:189-202|-	7|C5229274:261-274|+	N/A	7|C6226836:226-239|+	N/A	N/A	0.98	0.38	0.99	ATCAAACCCACAACAGCACAATCAGAGAATTACTCTCGTACTTCATCTTAATTATCACTCACCACTAACCTCTCCTGGCCACTAAACAGAACCCTAAACAAGACTAAACCATCACTGAAAAACAAGCCATGCACCTCATTACACGTTTATTTAAGACTCAGTTCAGTCATCCCTTCAATAGGTTAGAACTCCAGCCTCAC	TGGCTGCCATCCTCTACTTTAGATGAACCCCTCCCATTAACAACCAAACCCATGCGATCTTCATCACATCACAACTCACGCATGCAAACACCGAAAGTGCCACAAACTATAACACAAGATCGGAGGCTCACCTAGTGTCGCCGGAAGCCGGTCAGCCGTCCACCATTGACGTTCCCTACGCGTGGACACGGTGCCTCCAA	GCCATGCACCTCATTACACG	59.622	20	100	100	GGTGTTTGCATGCGTGAGTT	59.969	20	100	98.75	185	189	373	GCCATGCACCTCATTACACG	59.622	20	100	100	GGCACTTTCGGTGTTTGCAT	59.968	20	100	100	194	189	382	GCCATGCACCTCATTACACG	59.622	20	100	100	CTTTCGGTGTTTGCATGCGT	60.318	20	98.75
nSSR_1013	CA	9|C6191442:945-1362|+	10|C6176359:834-853|-	N/A	9|C5255820:339-356|+	8|C6072935:637-652|-	8|C6390770:1661-1676|+	N/A	N/A	0.75	0.38	1	TTGATAAAGACTTCCAGCACTGAAACTCACATTTGAGAGTAATCAAACCCTAGCTCCAAAAACACAGACCTGTATAGACAGTAGAGACTGCAAACCAAATCCTCAGTTCTCTATTCTCACCTACAAAAATCACATAAAGCTGCAAAACACTTGGCTCCCAAACCCTAGAGCTGCCAACTAAAGCAAACCAGCTATTTCGC	AAGAAAAAGGGTCAGTTTTGAAGTCAAACTAACCTTCAAAACCGGGAAACAGAAAGAAGCGCGACCTTCCCTACGTCCAAATCCCAATCTCCACCGCCGAATTAGGGCTCACAGACCACCCCCAAAGAACAAACCACCAAAGAACCGCAACCCAGCTCAACGCGCCAGGAAAACCCAAGCACAACCACCACCGGAGCTTC	CCAAACCCTAGAGCTGCCAA	59.962	20	100	100	CGCGCTTCTTTCTGTTTCCC	60.11	20	100	100	124	357	480	GCTCCCAAACCCTAGAGCTG	60.107	20	100	96.25	CGCGCTTCTTTCTGTTTCCC	60.11	20	100	100	128	353	480	CCAAACCCTAGAGCTGCCAA	59.962	20	100	100	AGGTCGCGCTTCTTTCTGTT	60.25	20	100
nSSR_1014	CA	9|C6200054:1431-1848|+	N/A	N/A	9|C5380310:800-817|+	9|C6028373:702-719|-	N/A	11|C7140184:1197-1218|+	11|C5684963:341-362|-	0.98	0.38	1	ATATTGTGTAAAGATACGAAGTTAACTATACTGCAGAAGATAAGCTTTTGCATGGAAAACAAGAATCAAAAGGTAGTAAGTAGTTGCTAATTACATAAAAAGTGCTGACAGTGCTGACCACTCAAAACCTAACCAGATGTCTTACACATAAAATTTTTGTTCAAATTTATAGTAAAATATTTATCATCAGATCTGGGCAT	TGCCACTACCTGAACAAAGGTTGCAGGATCTGTTGAAATATTGAGAAAATTCTCTATGCAATCAACAACCTGGAGAAGAAATTAACCACAATCATATCAAAATCACAACATTTGATCATGGAATTCATCGAGAAAACTAAGACAAAACCTACTTAACTTAGATAATTAGTACAGTACGAATGAAAATATACAAATAATGA	AAGTGCTGACAGTGCTGACC	60.534	20	100	100	TCCTGCAACCTTTGTTCAGG	58.309	20	100	100	147	299	445	AGTGCTGACAGTGCTGACC	59.93	19	100	100	TCCTGCAACCTTTGTTCAGG	58.309	20	100	100	146	300	445	AAGTGCTGACAGTGCTGACC	60.534	20	100	100	GATCCTGCAACCTTTGTTCAGG	59.77	22	100
nSSR_1015	CA	9|C6209138:1931-2348|+	14|C6239473:686-713|-	N/A	N/A	9|C5770039:193-210|-	11|C6387754:1534-1555|-	N/A	12|C5469357:292-315|-	1.9	0.38	0.99	ACAAAGGATTTTCTTGTAAATGGATTCGAATTACATCTACTTATGAGTAACCAAATTGCCTCTTAGAATGAGTTAGAAGACATTGAAAAGCTACTTCAGCAGCACTACCAGATGAATCCTTCTATACATTTTGAAGCATTGACAAATTAAGATTTGTGGGAGAATGTGGAACTCTTAACTCATCATGCATTAAATGCATG	GACAGTTAATGATAAATGAATGATGAATGCATGATAATTTAGGAGTTCCGCATTCACTGAATTCTCACAGAAATACTTTGATAATGTTCTCTGAAGACATTGTACTGTTTCTTTGTAACATATTTAAATACAAGAGTGCAATAATGAGTATGGATGCCTTTTCTTCTGGAAGTTAAATTATAATTTCTTAATAGATTTAA	ACTTCAGCAGCACTACCAGA	58.658	20	100	100	TCAGTGAATGCGGAACTCCT	59.023	20	100	95	186	292	477	TCAGCAGCACTACCAGATGA	58.439	20	100	100	TCAGTGAATGCGGAACTCCT	59.023	20	100	95	183	295	477	ACTTCAGCAGCACTACCAGA	58.658	20	100	100	TTCAGTGAATGCGGAACTCCT	59.652	21	100
nSSR_1016	CA	9|C6211964:1547-1964|+	N/A	10|C5275436:644-663|+	10|C5320998:588-607|-	N/A	13|C6370684:878-903|-	7|C7129312:1679-1692|+	5|C5719925:431-440|+	2.52	0.25	0.97	ATTGAAAGGGGCTGGATTTATTTAGATTCAAGGGGCAAAGTATGTTTTATACAAGTGAATGGCAGTATGACTAAGTGTATGTTAAGCAGTATATATCTTTCTATCTTAGCTGCAAAGAGTGATTGATTTCGAAGTTCAGGAATGCAGGTTGAAAATTTTCTGATGCAGGTGTAAATGAAACAAGTAAATATGCACGTGCG	AATCATAATAAATGGATTGAAATAAAGCATGGGTCATTTTGCAAGGCATGAATATATGATCAAAATCAGAACTTACATAAAGTAATCCAAGAACCTCACTCCTCTTTTGCCTCCCTCCTTGGAATATCCACATGTGGCAGGTAGTATGAGACATTCTCAAGTACTTGCAGTAGATGCAGAAATGAGGAAATCAGTAAATC	TCGAAGTTCAGGAATGCAGGT	59.652	21	100	100	TGCCTTGCAAAATGACCCATG	59.998	21	100	94.29	138	328	465	TCGAAGTTCAGGAATGCAGGT	59.652	21	100	100	CATGCCTTGCAAAATGACCCA	59.998	21	100	93.33	140	328	467	TCGAAGTTCAGGAATGCAGGT	59.652	21	100	100	CCTTGCAAAATGACCCATGCT	59.723	21	100
nSSR_1018	CAA	5|C6003518:246-660|+	N/A	5|C5069995:269-283|-	4|C5333616:393-404|+	N/A	5|C6072308:208-222|+	5|C7073086:365-379|+	N/A	0.4	0.38	0.99	ATTGTTTGTACACAATTACAAGTATAATAGACAAATCATGTATTAATGCAGTTCATGAAGCATGGATGAGTTAGAAGTAGAACAAGTAAGAGGAGGAAACAGAGAGCAGAGTTTATTTATTCTGGCTGGGCGATTGTGAGTAACCAGGTTTCACTGGCAGGCAGACAGAAATTAAGGCAGTCTTGTGTCAGCGAGTCAAC	AGAACAACTGGGGACATGCCTGTCAATATGGCCTTTTATCCAGGTTATTTTGATCATCAAGAGATAAATGGCGGCTGCCCCAATGCCGCCGGCCTTTGTATAAAACACCACCATATCCATCCTCATCCTCCCCTCTCTCCATCTTCATATTCAAGCCGAGTTAATTTCTCTTTCTCTAATTTGTTTCAAATTATCAGTTT	GGCTGGGCGATTGTGAGTAA	60.392	20	100	100	AGGCATGTCCCCAGTTGTTC	60.251	20	100	100	113	323	435	GCAGTCTTGTGTCAGCGAGT	60.599	20	100	100	GAGGGGAGGATGAGGATGGA	59.808	20	100	100	174	376	549	GCAGTCTTGTGTCAGCGAGT	60.599	20	100	100	AGAGGGGAGGATGAGGATGG	59.807	20	100
nSSR_102	AAC	7|C6219710:444-864|+	7|C6149037:596-616|-	7|C5189865:595-615|+	N/A	7|C6054449:1123-1143|-	N/A	N/A	6|C5479933:300-317|+	0.4	0.38	1	GTATACAAGCAAATTTCCCTTGTTTGTATGTGAAGGATTTTTCCAAATCAAAACAAGTTCGACAATCCTCAAAAAAGAAAGACTTACTTAAGTGCCTGAAGAGGACGACCAGAAAATGCAGAGGAGAATGGACCCTCAAAATCTTGAAGATCCTGCAGGCCATCCTAAAAGAGAATTGAGTATCAGAATAACAACAAACA	TAAGCCTTATTCCCATAATTGAGTATCAGAATAATCTGAAAAAAAAACAATCTGAAATTCATTGTCAAAGTAAAGATTGGAAGGAAAATTAATCTTAGAAGTAGAAAAAAAATACATGGAAAAGAATACCTCCTTAGGAGTTGCACAGTGGTTGTCCATTGCAGAGGACAAAGTCTTCCCTACACCATTATCCCCATCAA	GCAGGCCATCCTAAAAGAGA	57.282	20	100	100	GGAGGTATTCTTTTCCATGT	52.519	20	100	100	200	354	553	CAGGCCATCCTAAAAGAGAA	54.722	20	100	100	GGAGGTATTCTTTTCCATGT	52.519	20	100	100	199	355	553	GCAGGCCATCCTAAAAGAG	55.652	19	100	100	GGAGGTATTCTTTTCCATGT	52.519	20	100
nSSR_1020	CAA	5|C6049726:197-611|+	7|C6210187:1061-1081|-	5|C5151261:397-411|+	5|C5373282:291-305|+	N/A	5|C6334020:388-402|+	N/A	N/A	0.8	0.38	1	CATGTTACTAAACTCTTGAAAGAAACTCATTGATTACTCATAATATTACTTAGTTGGCATACTAAATCACTGAATACACACATGGAAGCATATAAATTTCTCTTTAATTGGCATTTAGTCAAACACAAGCTAAGCATAAATAAGATTCAGCATCAACACCTCTTCTTGAATCCTCAAAACAGAATTATACAAAGTACCGT	CAGCACTAACCACAACAAAACAACAACAATCATCCTTAACAGCAAGAACACCTACAACAACTCAACAACAACAAGAACACAACAACAATTACAACAACATCATTAACAACAACCACAACAACAGCTATAACAACAACTATGACAGCACATTCATCCCTCCATTTCATAGCTGAAATACACAATTTAACAACAGATATCAA	TCAGCATCAACACCTCTTCTTGA	59.929	23	100	100	AGCTGTTGTTGTGGTTGTTGT	59.108	21	100	100	195	342	536	CAGCATCAACACCTCTTCTTGA	58.594	22	100	100	AGCTGTTGTTGTGGTTGTTGT	59.108	21	100	100	194	343	536	TCAGCATCAACACCTCTTCTTG	58.594	22	100	100	AGCTGTTGTTGTGGTTGTTGT	59.108	21	100
nSSR_1022	CAA	5|C6181600:596-1010|+	N/A	N/A	N/A	5|C6022395:321-335|+	5|C6397452:347-361|-	6|C7109246:613-630|+	5|C5693321:509-523|-	0.4	0.38	1	GGAATGATGAGGTCAGATCTCAATGAATGTAACAAATAATTGGTAGGGGAACCACACATGCTGATGGCTGGATGGCAGTTGGAGTACAACTCACTGCCTTCAATTTTCTTTATCAATAAGCAAATGTTGAATTAAAAAATGGATAAATGCTTGATTGCATTGTAAACCCACATCAAGGAACCAGTATAAAGTACAACAGT	CTAAGCCTTATTCCCATAGTAGATGGGATCGGCTATATGGATTCTCTGTCCATGTCGCTCACAAATATGAAATACAAACAAAATGGAAATTAATTTGACAAATTGGAGCATCCACTAGCATGGCATTTGGTGTATTGCACTTCTTAATGCTGCATGTGAAACTCTTACAGAATAATACTAACCAGTAAAGAGTTTCAAAA	ACCCACATCAAGGAACCAGT	58.851	20	100	100	TGCCATGCTAGTGGATGCTC	60.179	20	100	100	175	365	539	ACCCACATCAAGGAACCAGT	58.851	20	100	100	TGTGAGCGACATGGACAGAG	59.755	20	100	100	113	365	477	ACCCACATCAAGGAACCAGT	58.851	20	100	100	CCATGCTAGTGGATGCTCCA	59.529	20	100
nSSR_1023	CAA	5|C6193968:77-491|+	N/A	4|C5341635:2188-2199|+	5|C5361688:533-547|+	4|C6082297:409-420|+	5|C6341406:367-381|+	N/A	4|C5472597:196-207|+	0.5	0.25	0.98	GAACTGTCATTGATAGAAGGATGCATGCCCTAAAACAAATGTCAGAAAAAAGATATAATACCTCACACAGAGTGTAGAAAGCAGGAGAGTCCAAGGAGAAGCCAAGCTTCACTAATGCCTGAAATAATGTTAAAGAACTGATGAATAAATTTTCCAAATGCACAAAGGTGATGCACATTCACCACCACCACCAACACCAC	TAACAACAACAAGTCATATAATTGCATACAAATGATAAAATTGCAGAAAAAAGAAACATCGCAAGCCTTAGTCAATTGTGCCCATCCACAAGATTATCTTCAACAGTTGAAACAGATAAATAAAAGGATTGGATCTACTCCAGGTCCCTTACTTGAGTGTATTGTTTATTTTGGTTCTTCACCTCAAAATATGTTTTGAT	ATGCACATTCACCACCACCA	60.179	20	98	100	TGGGCACAATTGACTAAGGCT	59.925	21	99.04	100	129	246	374	ATTCACCACCACCACCAACA	59.74	20	100	96	TGGGCACAATTGACTAAGGCT	59.925	21	99.04	100	123	252	374	ACATTCACCACCACCACCAA	59.74	20	100	92	TGGGCACAATTGACTAAGGCT	59.925	21	99.04
nSSR_1024	CAA	5|C6207510:899-1313|+	5|C6218357:1192-1206|-	N/A	5|C5375434:1222-1236|+	5|C5968561:452-466|-	5|C6401168:2367-2381|-	N/A	4|C5752007:495-506|-	0.37	0.25	1	TCAAATATGAGAAAGTCTCTTACCATTGCTTAACATGCAGTGTAGAATTCCAGCAATCTGCAAAAATTTTGATTGCAGAGTTAGGTGGTATTTAGGTAAGATGGTACATGATATGGATAGAACATAGACAAATCCATTAATGAAGTAAACACAAGTTATACACACTTAGGCTCTATCTCAACTTGTAAAGGTTGTTGTTG	CTAAGCCTTAATCCCATATTAGATGGGGTCGGCTATGTGAATTTTCTGTCTCCATGTAGCTCTGTCAATGACAAAATCCGGCAACTTGTCAAGTTATACACACTTAGGTTCTATCTCAACTTGTCAAGGTGGTTGTGTTCCCAAAAAAGATAATAGCCCTAGCTAATTTTTGGATCAAAAACCATAATACTACATCACTG	TGATTGCAGAGTTAGGTGGT	56.453	20	100	100	TCACATAGCCGACCCCATCT	60.399	20	100	80	186	269	454	TGATTGCAGAGTTAGGTGGT	56.453	20	100	100	TTCACATAGCCGACCCCATC	59.532	20	95	100	187	269	455	TTGATTGCAGAGTTAGGTGGT	57.212	21	100	100	TCACATAGCCGACCCCATCT	60.399	20	100
nSSR_1026	CAA	5|C6217474:310-724|+	5|C6157809:364-378|+	4|C5170575:250-261|-	5|C5391616:1641-1655|-	5|C6060877:492-506|+	5|C6383284:181-195|+	10|C6985148:421-450|-	N/A	1.84	0.12	0.98	TAAACCATCCATAACTAACCATAAAAACTAGTTCTTTTTCTGTTAAGAAGAAAGCTTGGATTGATATAAAAAGAAAGAAGTGGCCATAAATCTGCATTAATGACATACCACCACCACCTTTGTCTGATAATTGACACATACAATTCCAAGAACACAAAATAAAATAGCTTACCATTTATTAACAACAACAACATCATCAT	AAAAGAAAAGAAAAGAAAAGAAAAAAATCATCAAGGTAGAGAAGAAGGCAAGGAGAATGAGACCCCAGGGAGAACTCCAGCACCAATGTGCACAGAGACTCCAGGGCAATCCACAGAGCCAGTAGAAGGTATCCTCAAACAACTCAGGTCACCACCAGGAACCCCCAAGCAGTCCAATGGAGGCCTCTGCATGCCCCTCC	ACCACCACCACCTTTGTCTG	60.107	20	100	100	GGGGTCTCATTCTCCTTGCC	60.107	20	100	100	175	306	480	CCACCACCACCTTTGTCTGA	59.817	20	100	100	GGGGTCTCATTCTCCTTGCC	60.107	20	100	100	174	307	480	ACCACCACCACCTTTGTCTG	60.107	20	100	100	GAGTTCTCCCTGGGGTCTCA	60.252	20	100
nSSR_1028	CAA	6|C6008518:127-544|+	6|C6112969:213-230|+	5|C5249231:541-555|-	N/A	5|C6047363:255-269|+	5|C6336240:764-778|-	5|C6790959:190-204|+	N/A	0.47	0.25	0.99	TCCATATAATGTATTATTCAAGTTGAAGTGATGTTTCTGATAATCCTGACTATAAGATATTTCACAATCTATGGCTTATCATTTGCTGCTTCTGGAGCTCTCTCAAACACAAATCATCAGCAGAAGACAAATGAGGTGCCCCCACCAACAATGTCTGTCTTCCCAGAAGTGTTACTATAACTCACAAATCAGTAGACCAG	AAGAATCCAGAAAGCTCAACACACTTGCCAGACTGGTACTGAAGCCACGTTGCCTCTGCTCACAGCCTTGTGTTTTCATAGAAAATCCAAAATGGAAAAGCTTTCTATACCCTTCTTTTTTATCCACTGAGCCAGCTGTCTCCTTAAAAGGAATTATACCTCTCTTCATTGAAGAAAGAGACATACATTATCTATATATC	CCCCACCAACAATGTCTGTCT	60.203	21	100	100	TCTGGCAAGTGTGTTGAGCT	59.819	20	100	100	111	265	375	CCCCACCAACAATGTCTGTC	58.752	20	100	100	TCTGGCAAGTGTGTTGAGCT	59.819	20	100	100	111	265	375	CCCCACCAACAATGTCTGTCT	60.203	21	100	100	ACCAGTCTGGCAAGTGTGTT	59.744	20	100
nSSR_1029	CAA	6|C6147309:383-800|+	N/A	4|C5342215:4246-4257|+	N/A	6|C6042167:371-388|+	6|C6200206:391-408|-	4|C6971128:341-352|+	N/A	0.98	0.38	0.98	TAGTAATATATACCTTGTTTCACTTAAAAACATTGGATTACTTCACAATTGGATGACAAACATCATTGTTACATTGGTAATTTTGCTTTTGATATCACTAGTCTCAGTTCATATATTATAAAGCAGAGAACTTTTTGCCATCATCACTAAGATAATATCTAACTAAATATATAAAAGAAAGCAGTGACATTTCTAATGAG	CTAATCCTTAATCCCATACTAGATGGGGCATTTCTAATGAGCAAACAGTAATATTATATTGCATTTCATAATGTAATTTCTGCTTTTCATACTAGTTTCTATCCATGTATCATAAAGTAGGAACATTTTATCATTGTCATGAAGATGATTTCCTATCATGGCTGCATAATAAACAAAGCACTAAAGTCTCTGCAAAGCAG	GCAGTGACATTTCTAATGAGC	55.314	21	100	100	GCCATGATAGGAAATCATCTTC	54.74	22	100	100	200	380	579	GCAGTGACATTTCTAATGAGC	55.314	21	100	100	GCCATGATAGGAAATCATCT	52.463	20	100	100	200	380	579	579	579	579	N/A	N/A	579	579	579	N/A
nSSR_1030	CAA	6|C6207380:1204-1621|+	6|C6217005:314-331|+	6|C5118953:239-256|-	6|C5377324:484-501|-	6|C6049109:1239-1256|+	N/A	6|C6926194:245-262|+	7|C5748097:974-994|-	0.35	0.12	1	GATGGTGGGTCACCAAACGGGAACGGGTCTTCTTCTTCGTCCCCGCCTAGCTCCTGCGTGTCATCCTGCTCCAACAGCCCGGAGGCGCAACCGATGGTACTTGCTGGATGCCCCCAGTGCCTCATGTATGTAATGCTCTCCGAAGAGGACCCCCGGTGCCCCAAGTGCAAGAATCCTGTCCTCCTTGACTTTCTCCAGGG	CACCAAGATGAAGAACAGGAAGAGCTGAGGCTGGGATACAAGACACCTTTCCATCTATTACTAGTTTCCTCTTCTTCTTCATGGGAAAATTTAGTGTTAAGTCCCTGAAAAGACTAAAATTTGTCCCAATTCTTTTAGTCCTTCAAGTACAAGAGTATCTTCTACTTGAGGGACTAAAAGAATCATGGTCAGTGAATTAA	CGTGTCATCCTGCTCCAACA	60.321	20	100	100	GCCTCAGCTCTTCCTGTTCT	59.387	20	100	100	193	256	448	GCAACCGATGGTACTTGCTG	59.552	20	100	100	GCCTCAGCTCTTCCTGTTCT	59.387	20	100	100	163	286	448	GTGCCCCAAGTGCAAGAATC	59.755	20	100	100	TCTTGTATCCCAGCCTCAGC	59.167	20	100
nSSR_1031	CAA	7|C6113780:478-898|+	N/A	N/A	9|C5324938:539-565|+	8|C5974765:678-701|+	6|C6356970:202-219|+	6|C6781055:309-326|+	N/A	1.17	0.38	0.99	ACTCCCATATCTTCTCCTGAACAAATCATCAAATTACATCATATAAGCCTGAGCATACTAAACTAACTGAATTAACCTCTTAATTGACACAGTTTCTCTTTGACAATTCCATAAACACTTGTAGAGCATAAATGAGAAACAAAACTACATCTCATTCCTTGAATCTTTTAATCCCAATTAATACATAGCATTCACAACAG	GGTAACAACAACTATACAACCACAACATCATCACCAGCAAGAACAACACAAAACATCATTAACAACACCACGTCATCTTAACAGCTCACTGGCCAACCTGAATCCCAACGGCTTCTCGCTCACCGGAGTGTCAACAGAAGCTGGCCGTAGACGCTGCAGGAGGGTGCTCAGTGACTGGCCGGAGACGCTAAGAAAACAGG	TACATAGCATTCACAACAGC	53.711	20	100	100	GATTCAGGTTGGCCAGTGAG	58.543	20	98.75	100	144	381	524	TACATAGCATTCACAACAGC	53.711	20	100	100	CCAGCTTCTGTTGACACTCC	58.483	20	100	100	184	381	564	TACATAGCATTCACAACAGC	53.711	20	100	100	GTTGGCCAGTGAGCTGTTAA	58.395	20	98.75
nSSR_1034	CAA	8|C6094960:88-511|+	N/A	6|C5192465:369-386|+	8|C5074003:200-223|+	9|C6067901:1508-1534|-	7|C6356662:805-825|-	8|C6635411:212-235|+	5|C5680107:267-281|-	1.28	0.12	0.99	AATCTCCTTCAGATGATTCAAGTTGTTTTGCATTCTCTATTGATCTCCCATGAAAATAGAATAAGAATTAATTAATCTCTCATCACAACAAATCAATCATATATAAACCAACCAAAAATCTCATATATACCTCATACTGAGAATGCCACAAATCAATCCCAGTCATTTGCTGGTAACGATCAAACACATTCTTAGTACTG	AAACCAACATCAATCACATAAACTTCAACACTTAACCAAGTTATATAATCAGATCAAGAACATGCATACTCAGTGGAAGGACTACAATACTCAGCAAACTTCCCAGTGCTGGAAAACATTATGATTGAAACCTCAGCATCACAAAGCACTGTTAATTCCTTTGCCTTCTTCATGATCCCTTGCCTCCTCTTTGAGTATGT	GCCACAAATCAATCCCAGTCA	58.83	21	100	100	AGCACTGGGAAGTTTGCTGA	59.817	20	100	100	190	231	420	TGCCACAAATCAATCCCAGTC	58.83	21	100	100	AGCACTGGGAAGTTTGCTGA	59.817	20	100	100	191	230	420	TGCCACAAATCAATCCCAGT	57.693	20	100	100	AGCACTGGGAAGTTTGCTGA	59.817	20	100
nSSR_1036	CAA	9|C6044426:239-665|+	N/A	N/A	N/A	6|C5959559:756-773|+	3|C6333096:551-559|+	8|C7141790:486-509|+	8|C5655175:375-398|-	2.14	0.38	1	ATCTACATATCTGATCCATCAGGTTAGGGCTGTCTTTGGCATCTAACATCTTCCTAGAGCACCAAATATGATCTCTGATCAATTCCAAATTATAATCACTAAGCCATGAGGTGCATCCAAATACAACTGATAACTTACTTTTGCCACTGGCTTCATCCTACACTATCATATGCTTGTCATTGATCAAGTATGACTCAGAT	CCAAGCCTTATTCCCATATTAGATGGGGCCGGCTATATGAATTGTCTCCGTATCTCTCTGTCAAAGATAAGATCCGGCTTAATATCTAATATACATAGATCCTTAGACACTATTTCTCTCCACATAATTCTAGGCCTACCTCTACCCATCTTCTAACCTTCTATTAAGTATGACTCATAGATTACACAAAATTTCAATTT	AGCCATGAGGTGCATCCAAA	59.96	20	100	100	TCATATAGCCGGCCCCATCT	60.253	20	100	100	166	301	466	AAGCCATGAGGTGCATCCAA	59.96	20	100	100	TCATATAGCCGGCCCCATCT	60.253	20	100	100	167	300	466	AGCCATGAGGTGCATCCAAA	59.96	20	100	100	GCCGGCCCCATCTAATATGG	60.394	20	100
nSSR_1037	CAAA	7|C6199116:1326-1753|+	9|C6219855:511-546|+	N/A	8|C5221286:288-319|-	8|C6045847:1181-1212|+	8|C5922346:192-223|+	8|C7136100:820-851|-	N/A	0.58	0.25	0.99	GAACTTTGACTTAAAAGGCAGCATCCATTCCACATCTAAGGACGCGGCCATCAGATGACCATTAAGGGATGCGTGTATCCAAACTTCACACAGTATCTATCAAAGACAATTAAGCACCAAACAAACATGCTGTGCAAACTCCTGAAACATATCCAAGATCAAACTCTTTTCAACCAATTTGCATGTTTCATTAGTTTCTT	ATGAACAAAAACTATCCAAACAAAAAAGGCCTATTCATAAACTATGGCCAGGCTTATCCAACAATCATCTGGAACATATGAATCCAAACTATACACAGAATCTACCCAAAAACCATCAACAAGAATGACTGCAAATTCCAACTCACTAAAAACAATTAGTATCAAATACACATGCAGGAAAAACTACAGAAACATATCTA	ACATGCTGTGCAAACTCCTG	59.043	20	100	100	TGTTGGATAAGCCTGGCCAT	59.369	20	100	100	167	324	490	ACCAAACAAACATGCTGTGCA	59.793	21	100	100	TGTTGGATAAGCCTGGCCAT	59.369	20	100	100	176	315	490	CATGCTGTGCAAACTCCTGA	58.759	20	100	100	TGTTGGATAAGCCTGGCCAT	59.369	20	100
nSSR_1042	CAC	6|C6193274:757-1174|+	N/A	6|C5327392:843-860|-	6|C5357160:1035-1052|-	6|C6069755:855-872|+	N/A	7|C6863312:214-234|+	N/A	0.4	0.38	0.99	AAATTAAGTTATAATATATGTGGACAAGAAGACCAGTCAAATCCAAAAATCAACATATATAGCTAGCATCTTCTCCCATAACTCTTATATAAGCCAGGCCAGGCATGTCCTCAGGCAGCCTTTGACTCACATCCATTTCTCATTGTTGTTCCTTTCTCAACTTCAGATCTAATTACTTTATGGCAGCCTCTTCCTACCAA	CTCCACCAGCCTTTCCTTATGGACACTGGTTATCTTTCAAACACACCCATTGAGATGCCCCTGCGCAATGAAGAGATGGCTACCAATGTCTCATCTTCATTTCAATACTTCTTTGCACATGATCCCATGGCAGAGATTATTGATGCCAGACCCCATGAGAGCTGTGGCTCCCATAATAGTAGCTCCACCACCAAAACTTG	CTCAGGCAGCCTTTGACTCA	59.964	20	100	100	GGGCATCTCAATGGGTGTGT	60.324	20	100	100	169	309	477	GGCAGCCTCTTCCTACCAAC	60.393	20	100	100	CTCTCATGGGGTCTGGCATC	59.892	20	100	100	198	381	578	TCAGGCAGCCTTTGACTCAC	60.25	20	100	100	GGGCATCTCAATGGGTGTGT	60.324	20	100
nSSR_1043	CAC	6|C6197880:85-502|+	N/A	6|C5192413:550-567|+	N/A	6|C6063277:1178-1195|-	6|C6327120:228-245|+	N/A	4|C5719539:605-616|-	0.8	0.38	0.99	GTTTGAAAGACCCCATGAATATGCTACCAAATTGATAGCTTCAGTAGCATTCCGAGTGAATACAATTTCCCTTGGATCCACCACATTAAGAAAAGATGCGACTTTTCTTCTCGCTTGCTCATATTCATCTGTAGCCTTTGCACTTGAACCAACAAAAAAAACCAAGGAGTGAGCATGCCAAGGTGAACTTCGAAATTTAG	AATATTTTGATACAAAAGAACGTAAAATAAATAGAAGCAAATGACAATTAAATTGCACTCACGTTATCATAATAATACATACTGCAAAAATCTTAATATCACTAACTAGTAAGTTTAAAAAACCACAGAGTATCCTTAGGATCATACGGTGAAGTCTGGTTATGTGCAGATTTTCAGGGTTGGTAAAATGAAGAGTTGAT	GCATGCCAAGGTGAACTTCG	60.11	20	100	100	CTTCACCGTATGATCCTAAGGA	56.796	22	100	100	200	256	455	GCATGCCAAGGTGAACTTCG	60.11	20	100	100	TTCACCGTATGATCCTAAGGA	55.591	21	100	100	199	256	454	GCATGCCAAGGTGAACTTCG	60.11	20	100	100	TCACCGTATGATCCTAAGGAT	55.363	21	100
nSSR_1044	CACCAG	5|C6170741:254-683|+	N/A	4|C5335515:1046-1069|-	2|C5218496:350-361|+	3|C6088013:1416-1433|+	2|C6393054:1435-1446|-	N/A	N/A	1.17	0.38	1	GTTCTCGGTGATGGTTTCAGGAAGATGCAGCAGATGAAATAGCTGGGATGATTGCAGAGTTTGTGTTATCATTACCCAAGTCTATTAGGCAGGTAAATGAATACGCTGCTGATCCAGAGCTAGAGCATGCCCAGGCCCACTCTCACTCCCACTCCCAGAAACAGATGGTGGATGAAAGCAGCAGGAGCAATGATAATTTT	CACAACTATGATCATGTTCCTGGCCACGTGGATATGTGTGACCTTGGTCATGAGGGATGGTGGAAGTGAGCCTGGCTCTGCTCTATGGATGGATGGGATGCCCATGCTTATGGCCACATGGATCTTTACGGCGGCCTTTGCCACGAGGGGCGGTGGATTTGAGCCTGGCTCCTCCATGGATGGATGGCGTCAGCAAGATC	ATACGCTGCTGATCCAGAGC	59.967	20	100	100	CATATCCACGTGGCCAGGAA	59.82	20	100	96.25	166	300	465	ATACGCTGCTGATCCAGAGC	59.967	20	100	100	ATATCCACGTGGCCAGGAAC	59.82	20	100	92.5	165	300	464	CTCTCACTCCCACTCCCAGA	59.96	20	100	100	CATATCCACGTGGCCAGGAA	59.82	20	100
nSSR_1047	CAG	5|C6043858:162-576|+	5|C6190693:626-640|-	N/A	5|C5286586:252-266|-	N/A	5|C6338072:556-570|-	3|C7077784:803-811|-	N/A	0.8	0.38	0.99	TGAAGAGGTCTCTTCTTGTAATCTCCACAGCCAAGCTGAGAACTTTCTTGAAGGCCTCTTCTACTGGACATGGGATGACATCTTGACATCTCTCAAGAGCTGTGAGACCTTCTTCTCCATTGCTGACTCTTCTGGCCTGCTTCTCAGGCTCATCTCCTCCCTTCTTGCCAAGATCTCAGCAAACTCTGAATCAATACTCA	CAACAACAACAACATCAATCCCTTCATCTCCCTCATCATCTTCATCCCCAGACACAACTGGATTCAGGTGCTCAACATCCACAAAAACCCCAGACACCATCAAGCCATGCTTCACCAGAGAATGGTGGTTTGAGGACCTGGCAATCTTGTCCCCAAACACCATAGAGAAGATGATGAAGACTCTTGGAGCTTTTGGCAGT	CTCAGGCTCATCTCCTCCCT	60.106	20	100	100	GCTTGATGGTGTCTGGGGTT	60.251	20	100	100	178	303	480	CTCAGGCTCATCTCCTCCCT	60.106	20	100	100	AGCATGGCTTGATGGTGTCT	59.669	20	100	100	184	303	486	CTCAGGCTCATCTCCTCCCT	60.106	20	100	100	GCATGGCTTGATGGTGTCTG	59.545	20	100
nSSR_1050	CAG	5|C6221442:1897-2311|+	N/A	N/A	4|C5378228:1360-1371|-	4|C6037049:769-780|-	4|C6372758:1021-1032|+	N/A	4|C5706749:357-368|+	0.4	0.38	1	ACAATGATCATGGATGAAGATGAGCATAAGAAGGCGGCAGAATGGAAACCGTTCTGGTTGTTTGGGCGGAGTGGCAGCGTCGGTAGCAGTGGAAGTACAAAGCCGAAGACCAACAGTATGTGCCCCTTCCGGCGAAGTAAATCAGCTGGCTGCAATTCAAGGCCAATTGTAAGCACAACTTTGAAGAACAAGAGCAAGAA	CAACAACAACAACGGTATGGGACTTTCCCGGCGGGGATCATCAACGGAATCAAGCTCAAAGACATACTACTACTCAGGGGTGAAGAGATGGTCTCATGGAGATGGAGTGAGGATCAGTCCAGTTCTCAATGTGGCTGGTGCTTACTTACCAAGAGGAGGAAGCACTGGTAGCTGTAGAAGTAATAGCAGTAATAGTAACA	CAGCTGGCTGCAATTCAAGG	60.109	20	100	90	ACTGGACTGATCCTCACTCCA	59.922	21	100	100	196	342	537	CCCCTTCCGGCGAAGTAAAT	60.107	20	100	100	AGACCATCTCTTCACCCCTGA	59.921	21	100	100	187	322	508	CAGCTGGCTGCAATTCAAGG	60.109	20	100	90	AGACCATCTCTTCACCCCTGA	59.921	21	100
nSSR_1051	CAG	5|C6222606:3717-4131|+	5|C6147773:626-640|+	9|C5339583:367-393|-	N/A	10|C6082839:1408-1437|+	5|C6353510:998-1012|-	N/A	N/A	2.23	0.38	1	GTTGAGGCTGCATTAGCTACTGATCTTGGAGTTCTCTCTCTACTTAATAATGGTGAGAGAAGGAAGAGCTCTGAAAAATCAGAATCTCCCATCACTAGCCTGTCCAAGAGGAACTCCTTCAATGCCTCTGCTAAGACTGGCAATGCAAATGCAAAACTATCAGTAAGCCCATCCACCACCAACGCCATAACCATTACTAC	CATGTGGTCTAAAGGATGTGGACTTGTTCAAGCATTGGAACTTGCACAGACACTGAGACATGAAATGCAGACTTGGTTTTTGAAGTTTGTAGAGGAATCACTGGATGTGGGCTTCAGGTTGCTAGGTGAGCATTTAGATGATGAAAGAGGGGACAAGGACAAGAGCAAGATCACTGCAGTACTCTCACATTTGAAGCGAG	ACCACCAACGCCATAACCAT	59.961	20	100	100	CTAGCAACCTGAAGCCCACA	59.963	20	100	100	166	374	539	TAAGCCCATCCACCACCAAC	59.961	20	100	100	CTAGCAACCTGAAGCCCACA	59.963	20	100	100	177	363	539	GTAAGCCCATCCACCACCAA	59.961	20	100	100	CTAGCAACCTGAAGCCCACA	59.963	20	100
nSSR_1054	CAG	7|C6046088:411-831|+	8|C6167671:912-935|-	8|C5303716:740-763|-	6|C5292470:694-711|+	7|C5942463:464-484|-	N/A	N/A	N/A	0.75	0.38	0.98	CCTGCTTGACTGATGGTTACACATGCATGAAAGCTAGAGATATAAAGAAGAGAAAAAGAGATGGGCAGAGAGAGAGAGAGAGAGAGAGAGAAATTAGTAATAAAGATAGAAAGAGATGGTCATGAGTTGATGGTGTTGTAGTAGGATTGGTACTTGTGGTTGTTTGAGAAGCCAAAAGCCTCCATCACCAGCACCATCAC	CTGCAGCAGCAGCCATTGTCAGCCTCTCTCACTCCCATGGGGTCAGCTCCACCTCTCCTTAACTCTACCCCACTCCCACTCCTTCTCAACCAACCACAAAACACTTGTGATTAGCTCTGATCACCTCAATCTAACTTATATATTTTAGTAACAATAAAACCTATCTATCATTCTCCATCCATCACCACTGCCACTATTCT	TCCATCACCAGCACCATCAC	60.035	20	100	100	GAGTGGGAGTGGGGTAGAGT	59.959	20	100	100	122	380	501	AAAAGCCTCCATCACCAGCA	59.887	20	100	100	GAGTGGGAGTGGGGTAGAGT	59.959	20	100	100	129	373	501	TCCATCACCAGCACCATCAC	60.035	20	100	100	GAAGGAGTGGGAGTGGGGTA	60.253	20	100
nSSR_1055	CAG	7|C6127373:401-821|+	8|C6200517:992-1015|-	7|C5252817:476-496|-	7|C5366144:966-986|-	N/A	N/A	N/A	5|C5570915:264-278|-	0.98	0.38	0.99	TATTCTTCTAAGAGTAGCAAGGGCCAAATCTGAATGTTTTCTGAAAATAAATGCAGAATCAAGGAATAGCTGCTGAGATATCCTAAGGAAGCCAGGTTAAATAAGTTGCCACTCTTCAAGAGTGAATCACCACTGCCTCCCAAAAATTAAAGAATAAAACACACACTGCTAAGTCATATACAGAGAAATGAGCCTCACAA	AGAATGCAGCAAAATGCAACTGCAATTCTTAATGCACCAGAACAAACAGGGCCAAATAAAGACAAGGATAAATGATTCAAAAATCCCACACAAACCTCATTTTCTGTATTCCAAAATGAAGAAGGGAAGAAGTTCCCTCTCCTATCATCCTATGTATCCTCCATTGTCCAGTAGAACAGCAGCAGTGGTTGGCAGTAGGA	GAATCACCACTGCCTCCCAA	59.962	20	100	100	TTGGCCCTGTTTGTTCTGGT	60.033	20	100	100	153	323	475	ATCACCACTGCCTCCCAAAA	59.518	20	100	100	TTGGCCCTGTTTGTTCTGGT	60.033	20	100	100	151	325	475	AATCACCACTGCCTCCCAAA	59.518	20	100	100	TTGGCCCTGTTTGTTCTGGT	60.033	20	100
nSSR_1057	CAG	7|C6222270:289-709|+	N/A	7|C5224485:545-565|+	6|C5237612:231-248|+	7|C6034751:985-1005|-	7|C6279592:503-523|-	N/A	N/A	0.4	0.38	0.99	CTTTGATTCCTTCGATTTTTCTTGTGTTTGTGAATTCATTTCTAGGATTTGAGGTCGAATAGTAAGTAGATTTTGGTTTTGTGTTGAGATCGGGAGAGGGATTGATGAATAATAGAGGAAGGTATCCGCCTGGGATCGGGAACGGGCGTGGAGGGGGGAACGCGGGTCAAAGCCCTAATTTTTATGGAAGGGCTCCGCCC	CACCAACAGCAGCATCAGCAGTACGTGCAGAGGAATCCTTTGCAGGGCCAGCAGAATCAGATTCTCCAGCAGCAACAGCAGCAGGTGCAGCAGCAGCAATGGTTGAGGAGGAATCAGATGGGGAGTGAGTCGGGTGGAAATGAGGCCGCCAACTCTGTTCAGTCTGGTATGATCGATGCAAGGTGAGAAACTGAGAAGCA	TGTTGAGATCGGGAGAGGGA	59.665	20	100	100	GCCCTGCAAAGGATTCCTCT	60.034	20	98.75	100	188	281	468	CGCGGGTCAAAGCCCTAATT	61.03	20	100	100	GCCCTGCAAAGGATTCCTCT	60.034	20	98.75	100	109	360	468	TGTTGAGATCGGGAGAGGGA	59.665	20	100	100	TCTGCACGTACTGCTGATGC	60.737	20	100
nSSR_106	AAC	8|C6207636:1255-1678|+	8|C6204549:755-778|-	8|C5309624:1145-1168|+	N/A	N/A	7|C6222820:439-459|+	3|C7138836:806-814|-	N/A	1.94	0.38	1	ACAACACATTCACATTCCTGTGTTGCTTGCATCTACATAAGATAGCTCAAGGATGGAGATGGGCACAAAATGTTGTACTCTCTTGAAATGAAAAGCTGAAATTATTGGCATGATGTGTTTGCACATGTGGGTTAATATGTTTTTAGCATGTATTTCTTGAGATTTTGCTACATTTATTAAAAATATTGACATTAAGACAA	ACAAATGGGTTATAAAAAGAGTCATCAACATAGAAATCCACAAGGACATCAGGCCAATGATTAATATCTCATGATCGCATTGAACAGATTTAATCACATATTATCTGCATGAAATAAGACTTAAAAACACAAGTACAAATGCTGATGAAATAATAAAGCATAAAAGAGAAACGAATTGATTCAGGTTAATGCACCAGCAT	TTGGCATGATGTGTTTGCAC	57.848	20	100	100	TTGGCCTGATGTCCTTGTGG	60.251	20	100	100	177	304	480	TTGGCATGATGTGTTTGCAC	57.848	20	100	100	GGCCTGATGTCCTTGTGGAT	59.743	20	100	100	175	304	478	ATTGGCATGATGTGTTTGCAC	58.309	21	100	100	TTGGCCTGATGTCCTTGTGG	60.251	20	100
nSSR_1060	CAGT	6|C6197668:1201-1624|+	7|C6242361:711-738|+	N/A	6|C5357420:404-427|+	5|C6069689:1324-1343|+	N/A	N/A	7|C5761051:2921-2948|-	0.75	0.38	0.98	CATAGAACAATTAATCCATTCCATTGTTGCAGGATGGAGAATATTCTCTTAGTTGTATTGTAAAAGAATCAATTAATATTGAGCGTGGAAGCCTCAGAAGTCACAATATATATAAGAGGGGGCCGGCCGGCGTGAAACTCATAACAGGGAGCTTTTCTGCCGGCCTCTTGTTGACTACTTAAAACGCGTGGCTCTTTTAC	ATATTGCTGCTGCTGTTAAGACGTTTCTGAATTTCTCCTCTCAGGAGTTGAGGACTCTGCCAGCCTTAATTGGCACTATCCACTGGAGTTGGAGGTGACTTACAACTCTCTCCTCTCTTCTTTTTGTGGCTTGATATATCATGCACTGGATCATATGCCTGCTCTTCTGTCTCGTATGGCAGGCAGGGGATTCTGAGAGT	GCCGGCGTGAAACTCATAAC	59.904	20	100	80	GTCACCTCCAACTCCAGTGG	59.965	20	100	100	198	325	522	GCCGGCGTGAAACTCATAAC	59.904	20	100	80	TCACCTCCAACTCCAGTGGA	60.105	20	100	100	197	325	521	GCCGGCGTGAAACTCATAAC	59.904	20	100	80	ACGTCTTAACAGCAGCAGCA	60.25	20	100
nSSR_1061	CAT	5|C5898946:100-514|+	5|C5934278:328-342|+	5|C5089579:417-431|+	5|C5373810:619-633|+	N/A	5|C6209518:356-370|+	N/A	4|C5672579:399-410|-	0.37	0.25	1	TGCTTTGGAATTAGGCATGTCAAGGTTGTAGAGAAGGAGAACAATGGAGATTGAACAAAGGAACAGCAAGAGTGGACCAAAGATCCACAAGAGGAGAGGGACAGCAGTGTAGAAGAGCCTGTTCCCTATGGTGTTGAGCACAAAGCCCCTGTCTAACATGTCTAAGATGTGCTCAAACCTCACCGGAGATGCTGCGCCGA	CGAAATCGGAGGACGGGATGTTGATGAGGAAGTTAACTTGGTTGAGGAACCTGATGGAGAGAGAGTAGCAGAGGAAGGCAAAGAGGAAGATGAGCAGGAGGAGAACATATTTGAGAGCAAGCATGAGTTCTCCATGAGCACCGAAGACTATGTCGCCGACCGCCCGCTTGACGCTGTATGTGCTGCTGATGATGGCGGCC	AAACCTCACCGGAGATGCTG	60.036	20	100	98	GCGACATAGTCTTCGGTGCT	60.179	20	94.88	98	197	273	469	CAAACCTCACCGGAGATGCT	60.036	20	100	97	GCGACATAGTCTTCGGTGCT	60.179	20	94.88	98	198	272	469	TCAAACCTCACCGGAGATGC	60.036	20	100	96	GCGACATAGTCTTCGGTGCT	60.179	20	94.88
nSSR_1062	CAT	5|C6065546:192-606|+	5|C6029938:273-287|+	N/A	N/A	5|C6070273:396-410|+	5|C6180112:394-408|+	6|C7030352:468-485|-	N/A	0.4	0.38	0.99	CAATTCTTCCATGCACTCGGAGGTGAGTATATCAATATCATCGATACAATAGGAGGTGTCATCTTGAGCAATCGTGTCTCATCGCATCGGGCAACTTGAACACCACCTCTTCGTCTCCCACTCTCAATGCAATCTTGCCTTGCACATGGTCTTCGATGCTTGAGCGGTTGCTAGGAAAGGGCGCCCAAGGATGATTGGAA	CAACATCTAGAAGTATAATGTCGGCCAGGAAGACAAATTGATTAATTTGGAAGAGTACATCCTCCGCTAATCGTTTAGGCCTCCTCACAGATCGGTCAGCTAGTTGCAATGTCATCCTAGTAGGCTTTGGTTCTTCAAGACCCAGCTTCATGTAAAATTTATACGGCATCACATTTATGCTAGCCTCTGAATCTGCCAAT	TGCACATGGTCTTCGATGCT	60.036	20	98.75	100	GCTGACCGATCTGTGAGGAG	59.898	20	100	100	175	331	505	TCTTCGATGCTTGAGCGGTT	60.037	20	97.5	100	GCTGACCGATCTGTGAGGAG	59.898	20	100	100	166	340	505	CTTCGATGCTTGAGCGGTTG	59.904	20	98.33	98.33	GCTGACCGATCTGTGAGGAG	59.898	20	100
nSSR_1065	CAT	5|C6220226:2229-2643|+	5|C6020050:193-207|+	5|C5292884:413-427|+	N/A	5|C5637597:194-208|-	N/A	4|C7084916:305-316|+	4|C5758843:771-782|-	0.47	0.25	0.98	ATGTTTATTCCTTGATCATACAAACACTTTGATTTGATAATAATTTATCATACTAAACCATAAATTCTTCTTAACTAATCATTGTCCTTGATTCAATCCAAAAGTTCATCTACATCAAATTCAAAACTAAATACTAAAACTATAATTTGGAATGGTAACCCTCTTTATAATGCCATGTTACGCACCATGTTATTATGCCA	GTTCACCCTCATAATCTCTCCATCTCATCACCATATCAATGTGCCATGTCATTGTTATGTTGTATTGTGCTCAATTGCAATAAACACAACTTTTAGGCATATTCAATAAGCTTTCAACCTTAATCTTAATTGGCTCTTCATAGGTCATCTTCATCTTCATCTTCTTGCAGCATCTCCTCCCAACTTGGCTCGTCTCTCAT	GCCATGTTACGCACCATGTT	59.474	20	99	100	TGAAGATGACCTATGAAGAGCCA	58.967	23	100	100	197	371	567	TGCCATGTTACGCACCATGT	60.608	20	99	100	TGAAGATGACCTATGAAGAGCCA	58.967	23	100	100	198	370	567	ATGCCATGTTACGCACCATG	59.26	20	100	96	TGAAGATGACCTATGAAGAGCCA	58.967	23	100
nSSR_1066	CAT	6|C6094342:465-882|+	6|C6243971:828-845|+	10|C5307206:1177-1206|-	N/A	9|C6054857:1189-1215|-	11|C6366524:940-972|+	N/A	7|C5697143:474-494|-	1.95	0.25	1	CTAGTGTGATGATGATTGGAGGGTGTGCAAGTTTAATTTAATTGTAGGGGATGATGGGCGCCAGGCAAGGATACAAAGGCCCAAGTCCAGGCAGGCTGAGTCTTGCACTATCAAATGCGTAACTACTTGCATCCGTGGCGGTGCAGGCTCCCCCGGAGAGGGCCCCCTCAACGTCCGGAGGTATAATCACTACTACTCAC	CAATTCATCATCATCTGTTTGTTGCAGGCCGCTTGTGGTTTTCAAGCAAGGATTCCGCAGTCGTCACTATTGGTGAGCATTGTTTATAGGTAAATTGAACTTCTTAGGTTGGAAAATTGAACCCCTGAGTTTGTTATTCCATGAAGCTTGACCGAGTGCTCAGACATCTGTAACCTGATCAAAGATGGAGATGATGGACC	GCAGGCTGAGTCTTGCACTA	60.037	20	99	100	ACTGCGGAATCCTTGCTTGA	59.963	20	100	100	189	290	478	GCAGGCTGAGTCTTGCACTA	60.037	20	99	100	CGGCCTGCAACAAACAGATG	60.388	20	100	100	159	290	448	GCAGGCTGAGTCTTGCACTA	60.037	20	99	100	TGACGACTGCGGAATCCTTG	60.39	20	100
nSSR_1072	CAT	8|C6205538:405-828|+	N/A	8|C5332983:1258-1281|-	8|C5097573:212-235|+	N/A	9|C6293418:263-289|-	9|C7120238:1421-1447|+	N/A	0.49	0.38	0.98	TGTTCAAAAGAGTCAAGGGTTCAACTTCAACATTTCAAATCGTGCAGGAAGTAGCAGCAGTCCTACTCTGAATCGATACCAGTCTCTCCCTGTACCACGGCAAGGAAGTTCCTCAATAAAAGATCATTTCAAGAAGCGGTTTTCCTTTAAAGGGAAGATAGGCAAGGATATCTTCGGTGCAAAGGTATTCGGAAAAAATG	CTCAACATGACAACCACAACCAATTTGGTCGCTTTAGAACATGAACATGACGGCGAAGGATGTAGTCCCAGGTCAGTTCGTCCTTAGTTTTTTGTGATATATATATAGCAAACAGACCAATGTTCATCTTGAATTTGTTGGGGCTCTGTTTAGCTAGACATTGTAACTTGCACTAGTGCTTTACTTTATCAGATACTTGT	CTGTACCACGGCAAGGAAGT	59.965	20	100	100	ACATCCTTCGCCGTCATGTT	60.036	20	100	100	198	289	486	TACCACGGCAAGGAAGTTCC	59.964	20	100	100	ACATCCTTCGCCGTCATGTT	60.036	20	100	100	195	292	486	CTGTACCACGGCAAGGAAGT	59.965	20	100	100	TCCTTCGCCGTCATGTTCAT	59.751	20	100
nSSR_1074	CATC	5|C6208736:1549-1968|+	4|C6189661:931-946|-	N/A	5|C5294906:418-437|+	5|C5980791:823-842|+	4|C6398260:735-750|+	N/A	5|C5480003:264-283|-	0.47	0.25	0.98	TCTCATAGCAATAGAGTGATCCTGAGGTCGAGAGTTCGAGCCTCTCTCACCCCAATAATTTTTTTTCCTCCCATTTTTAAATGATGATTCAAACAAGCCAGAAGATGATTTAACGTGGATGGATTAACAAAGCTTTTTTTAATTCTCCTCACGAGTTAGAAAAACAAACATTCACTGTGACCTGACCTCCGTGAACCTGT	TTCAATCCTTCACATGAACCCATGCATGCACTTACAGCAGTGTCACATTCATTATTTAAGTTCAAGATGCTTTCTTTCAGTGGCACTGGCATTCATTCCCATATGCATTGCTGGAGAGTTTAATGGAGGAGCATGCCATGCCATCCTCCAATCCTACCATAAATTTGCATTTCATCACAAACAAATCAAAGAAAGTGATT	CTGACCTCCGTGAACCTGTC	60.038	20	100	98	ATTGGAGGATGGCATGGCAT	59.81	20	100	100	191	381	571	CTGACCTCCGTGAACCTGTC	60.038	20	100	98	GATTGGAGGATGGCATGGCA	60.469	20	100	100	192	381	572	GTGACCTGACCTCCGTGAAC	60.32	20	100	88	ATTGGAGGATGGCATGGCAT	59.81	20	100
nSSR_108	AAC	9|C6133601:624-1050|+	9|C6181299:409-435|-	N/A	7|C5394472:1627-1647|+	N/A	8|C6386788:1518-1541|+	N/A	6|C5694393:683-700|+	1.17	0.38	1	TTATTGCCAATGTATCACAAGTTATAACAAGCTCCTCTCTTTCTTGCAAGGAATCCGAACAATAGCCACCGCCCAAGAACTGTAGAGAATCCTGAGAATTTGACAAAAGGTGAAGGTCTTAGCTTGACCAGTCTCTATATCATTCAATGCACCGCAGAGAACAAGAGACCAATGGAATAAATAGACAGATTTGAAGAGAA	AAGAAAAAAAAGAAAAAGGTTCTTTCTTTAGATGATCAACAAGAGAACATGGGGGAATCCAAGCTAAGTAAAACAAGATGAAATTTTGGGGTGAAAGAACAAGATTAGAGTCATGGATGAGAGGAATTTCATACTTGACACTTGATACCTTTGTAGAAGATAACAAACACCAAAAGATGAGAGCTTGGAGAAATTCAGCA	ATGCACCGCAGAGAACAAGA	59.965	20	100	100	CCCCATGTTCTCTTGTTGATCA	58.311	22	100	100	135	346	480	TCAATGCACCGCAGAGAACA	60.25	20	100	100	CCCCATGTTCTCTTGTTGATCA	58.311	22	100	100	138	343	480	CCGCAGAGAACAAGAGACCA	59.682	20	100	100	CCCCATGTTCTCTTGTTGATCA	58.311	22	100
nSSR_1084	CCA	6|C5980924:72-489|+	6|C5798349:231-248|+	6|C5031749:184-201|+	N/A	4|C5891073:221-232|+	6|C6218302:516-533|+	N/A	N/A	0.8	0.38	0.97	CCCTAGCCACACAGAGCCGCCACCCTTGCGACCGATCTTCACCTCCGTCGACACCGCTTCAGCACTCCGTCGCACACCTCACCACCGCTGCTTCAAGCCAGAAAGAGAGAGGTCTGAGCCCTCGCCACCGCCGGATCCCGCTCACCGACAGTTTTCACCTTTCTCCCTCTTCATCTATTTCTCTTTCACCTCGCCGCCGG	CCTCGCCGTAGTGCACCATGCCGCCAAGGAAGAGGACTGTTCCGGGGCCCAAGCCAAGAAGACCAGAGGAGAGAGCAGCTCTGGGCCCCAGCCTGACCCTACCTTCTCGGTGCCTATGCACGCGGGACGTCATTATAGGCATCGCGGACTTACATTTGGCGAGGCCCGACACATCGATTGGGATGCTCTCAGGCAGGTAG	CGCTGCTTCAAGCCAGAAAG	60.11	20	100	85	TCTGGTCTTCTTGGCTTGGG	59.598	20	100	100	200	156	355	CGCTCACCGACAGTTTTCAC	59.768	20	100	100	TCTGGTCTTCTTGGCTTGGG	59.598	20	100	100	147	209	355	CGCTCACCGACAGTTTTCAC	59.768	20	100	100	GCTGCTCTCTCCTCTGGTCT	60.684	20	100
nSSR_1085	CCA	6|C6040190:381-798|+	3|C6010914:252-260|-	N/A	N/A	6|C6071673:1502-1519|-	6|C6400966:1708-1725|+	3|C7113920:409-417|+	N/A	1.47	0.38	0.99	CTTCACTTCATACCCCTCTCACTATCTTCCAAGATTCATAGAGAGAAAGAGAGAGCCATGAGAACCCCTAACTGCACCATGACCACCTTCATTCTCTCATCTCTTCTCATTATCACCATAATCTCCTTCTCTCTTTCAGCAACCTCTGGTGTTCATGTTTCAGCCACCATGGCCAATGATGCCTTTTCCGTCCATCACCG	CCGTCTTGTAGGAAGTTCTTCTTCCTCACCTCCACGGAAACTCCACCCACATTATTGGTGCTTGCAGTTCCCCCAAGGTCGGCTCAAGCCACCGCCAGAGGCTCCACCGCAGCTTGAAATTGATCCGAGATATGGCGTCGAGAAGAGGCTTGTTCCCACAGGGCCCAACCCTCTCCACAACTGAGTACTGCAACTAATGT	AACTGCACCATGACCACCTT	59.814	20	100	100	GAGTTTCCGTGGAGGTGAGG	60.037	20	100	100	192	269	460	AACTGCACCATGACCACCTT	59.814	20	100	100	GGAGTTTCCGTGGAGGTGAG	60.037	20	100	100	193	269	461	CTGCACCATGACCACCTTCA	60.251	20	100	100	GAGTTTCCGTGGAGGTGAGG	60.037	20	100
nSSR_1086	CCA	6|C6195280:289-706|+	5|C6187079:755-769|+	6|C5315994:522-539|-	6|C5306186:608-625|-	N/A	N/A	5|C7057568:474-488|-	6|C5593943:510-527|+	0.47	0.25	1	AGTAGTTTGAACCCCTTAGGCGACACACCTTCGAAACACCCGCATGACACTGGCCAGCAACAGCAGCCGCAGCATGCTATTCAGGGATTGAATGCCGACTCGGCTGCGGCGATGCAACTGTTTTTGATGAGCCCACCTACAGGTCAGCCGCAACACACAAGGTCACCCTCACCACCTCCCCCTGCTCCTCCACCCTCTCT	CGCTTTTCAGACTCCATCATTCGGGGAGACATCGTTCGGGAGAGGAACTGTTGTGGAAGGCCAAGGCCTATCCTTATCGTTAGCGTCCAATCTTCAACAGTTTGAAATGGCCAAGGCTGAGGAGCTAAGAGTGAGAGATGGGGTTTTGTACTTCAATAACCAACAGCAACAGCAGCAACCGCAGCAGAGCCACCCCCACC	AGGGATTGAATGCCGACTCG	60.179	20	100	100	TCCTCTCCCGAACGATGTCT	60.034	20	100	100	182	282	463	ACACACAAGGTCACCCTCAC	59.82	20	100	100	TCCTCTCCCGAACGATGTCT	60.034	20	100	100	112	352	463	AGGGATTGAATGCCGACTCG	60.179	20	100	100	CGAACGATGTCTCCCCGAAT	59.898	20	100
nSSR_1088	CCA	8|C6114498:435-858|+	N/A	7|C5159881:323-343|+	7|C5299280:268-288|-	8|C5816753:334-357|+	5|C6219602:231-245|+	N/A	N/A	1.1	0.38	0.98	CCAAACTAGCTTTATGAACCCTGATATAGCACTAAGCGAATGGAGAGAAATTAAGAAAGTCAAGAATAATTAAGAAACAGCTGCTAGCACTATATATCCATGCATCATCATGCACTGCTATTAGTGCATGCCCAACTATAGAAAGAAGTGCCATGTAACCCTACTGCCACTGAACCCCATGAACATGGCTAGAAAAAGCT	TTTGCACCTCCACTTCCATGAAAGCCACCAAACCCTAAAAGACTAGCATTCATGGCTCCACCCTCATCGGCCGGAGACGGCTCGCCTTGCCTTGCCGGCAAGTTTTTATCGTCTTCGGTCTCTCGGTACTTATTGAGATATATCTTGAGAGGAACAACATAATTCTCAAATCCAAGTGCAGTCATGGCTGAGAGGAGGTC	CTGCCACTGAACCCCATGAA	60.251	20	100	100	GGGTGGAGCCATGAATGCTA	59.817	20	100	100	124	363	486	GCCATGTAACCCTACTGCCA	59.745	20	100	100	GGGTGGAGCCATGAATGCTA	59.817	20	100	100	138	349	486	CTGCCACTGAACCCCATGAA	60.251	20	100	100	TACCGAGAGACCGAAGACGA	59.753	20	100
nSSR_109	AAC	9|C6210040:1701-2127|+	8|C6102919:440-463|+	N/A	N/A	10|C5945559:219-248|+	11|C6397184:1920-1952|+	6|C7012502:226-243|+	N/A	1.72	0.38	0.99	TCACCTTTACCCAATTTCTGCAGGCCTACTAAAAACATCCGATGCTCTTCCTCAGTCCAAGGGGTGCCTGTATCCGAGCCAAAAGGATCATGAGTCAAAACCATATGAGTTTAATGTTATTAATAAGAAAAGGATTGATAAATAGAAGGTAAGAAAGATCTTATCAAGCACTGAATGAACTGATGCTTTGATATTTACTT	AAGAAGTCAGTTCACAGAAGAGGAATGGCACATCATTACTTCATGTGAAGTGGAACCAGGAATGGAAGTGACAGAAACAAAGAAGAGATTATGGCATCGTTTGATCATGTAAATATAGATATTATACTTTAGAAAATATGTTGATAGAATATTGTTGTCAATCATTATCATAGTTGTCTAGATACTTGACAAGGAAACAT	TGCCTGTATCCGAGCCAAAA	59.673	20	100	100	TGTGCCATTCCTCTTCTGTGA	59.301	21	100	100	195	264	458	GTGCCTGTATCCGAGCCAAA	60.392	20	100	100	TGTGCCATTCCTCTTCTGTGA	59.301	21	100	100	196	263	458	TGCCTGTATCCGAGCCAAAA	59.673	20	100	100	TGTGCCATTCCTCTTCTGTGAA	59.894	22	100
nSSR_1090	CCAAAG	5|C6208012:1588-2017|+	5|C6240755:1530-1559|-	2|C4968436:211-222|+	5|C5238666:366-395|-	N/A	N/A	2|C7138690:1742-1753|+	N/A	1.47	0.38	0.97	GGAAGCACCATGAACAGTGCTGCTAATGGAATTGAGATGCAGAGAGGTAGTTCCTTCTTTGACAACAGTATCTTTCAATGGTCAGACCTGACAGCTTCTTCTAAAGAAGCTCAAGCTCAAATTCAACAACTGGAAAGCGAACCAGAGGACCTTAAATGGTCAGAGTACCTCCAGGGCACCTTCTCAATGTCAGCCGCCAT	CCAGAGCCATAGCCAAACTTTGTACAATGACATGAAAACAGAGAACCAGTTTGAGAATATGGATGGGTTTAGTTCTTGGCACCAGAGCCAGCATCAGCATCAGCATCAGCAGCAGCAGCAACAGTCTCCGGACATGTATGAAAAAGATTTCCAGAGGATGAATATCCACAGCTTTTGAACATAAACCATACAAGAGCAAA	TTCTCAATGTCAGCCGCCAT	60.035	20	100	100	ATGTCCGGAGACTGTTGCTG	60.037	20	100	100	185	380	564	TTCTCAATGTCAGCCGCCAT	60.035	20	100	100	CATGTCCGGAGACTGTTGCT	60.037	20	100	100	186	380	565	TTCTCAATGTCAGCCGCCAT	60.035	20	100	100	GCTGATGCTGATGCTGATGC	60.04	20	100
nSSR_1091	CCG	5|C5817660:57-471|+	5|C6184109:229-243|+	5|C4959350:250-264|+	N/A	5|C5900101:343-357|+	8|C6182518:403-426|+	5|C7033394:319-333|+	N/A	1.12	0.25	0.99	TACCTTACCTTACCATAATAATATTACATAAGTCTGTATGCCAAGTCAGAGCCAGAAACTACTACAAGCCACATAACATCTCCTCGATCGATCCATAGTTATATTTATATATTTATATAAAAAGATAGTACCAGTGAAATCAGGCTTAGCAGTAGGCAATACAGTGCTTCTTGCAGTCAATGGTGCAGCCTCCGCCGCCA	TTCTTGCCGGAGTGGCTGTAGGAAGTGAAGCACTTTGCCGGGCAAGTCACACGCTTGTTATAACATGGCCCGCGCTCAGTGCAGACCACGCTCGGCTTGATCACACCGTTTCGTGAGTAGCTACCGCCGGAGCCGCCATAGCCTCCGCCATAGCCGCCGCCGATGTTGCCCCAACCGTCGCCGTTGAAACCTGGGATGTT	AGGCAATACAGTGCTTCTTGC	59.185	21	100	100	CGAAACGGTGTGATCAAGCC	59.834	20	100	100	175	209	383	AGGCAATACAGTGCTTCTTGC	59.185	21	100	100	GGCGGTAGCTACTCACGAAA	59.828	20	100	100	190	209	398	GCAGTCAATGGTGCAGCCT	60.975	19	100	100	CGAAACGGTGTGATCAAGCC	59.834	20	100
nSSR_1097	CCG	7|C6196400:1120-1540|+	4|C6046158:282-293|-	N/A	4|C5369134:921-932|-	5|C6088213:3788-3802|+	4|C6190612:243-254|-	N/A	N/A	1.17	0.38	0.98	TACTCGCCGCCCCGGCGTCGGCCTTCGACGCGCCGCCCCGCATTATGCTCCCGTGCCCGTAATTCCCAGTCCCAGAGCCGAGCACATCGTTTCTCGCCGGAATCCGGCTCATCATCCCCGGTTTCCCGATCTTGCCCGACGGGCAGATATTCCCGGCCGGAAGCACATTCGTCACCGGCGAGCTCGCCGTGCTGTTGCTC	CCACCGCTTGAGTAAATCAGCGGCCCTGACCCCGACCGACGGTGCCCAGGGCGGGAGGGGAACCCAGTGGGGCTGCTCTCGCCCGACGCGGAGAGCTCCCCGGAGTGGCTCAGCCTCCCGGCGGCGCCACCATCAGAACCCCTCCTGACGGCCGCATTGTGCTGCGGCTTGCCAGAGACGGAGCCCGAAGAACTGGAGCT	ACATCGTTTCTCGCCGGAAT	60.108	20	100	100	GCCGCTGATTTACTCAAGCG	59.973	20	100	100	162	283	444	CTCATCATCCCCGGTTTCCC	60.179	20	100	100	GCCGCTGATTTACTCAAGCG	59.973	20	100	100	138	307	444	ACATCGTTTCTCGCCGGAAT	60.108	20	100	100	GTCAGGGCCGCTGATTTACT	60.108	20	100
nSSR_1098	CCT	5|C5922285:65-479|+	4|C6193983:613-624|-	5|C5339607:712-726|-	4|C5382996:1134-1145|-	5|C6031327:884-898|+	N/A	7|C6996840:280-300|-	N/A	1	0.25	0.99	TGAGCCAAAAGAGGTAAGCAAACAAAGGCAAAAATAAGAGAGAGAAGTGAGAGAAGTCTCTCCTTTTTCAGTTCTTTGTAGCAGCAGAGGAAATGTTGCTTCCCATGGATGAAGGTGACCAAATATCAGCACCATTGTTGTTTGCTACTTGCTCAGTGCATGACACTGGAACCAGACACAACCCCCTTCTCCTCAACTCA	TCTCCTTCATCCTATCAAACATACAATAAATTATTATTACTCTTTAATTTAACACAATATAATAATACATGTATATTGAAGAAGATAATTAAAAAAGTAATTTACATTCAGGTTGGCAGCTGTTGTTGCCAGACTTTGCATGTACGGTAAGCTCAGAACCTGCTAAAATAGACTTATTAGCTTTTTTGAAGTGATAGAGA	ACTGGAACCAGACACAACCC	59.817	20	100	100	ACAGCTGCCAACCTGAATGT	60.179	20	100	100	174	228	401	ACTGGAACCAGACACAACCC	59.817	20	100	100	CAACAACAGCTGCCAACCTG	60.249	20	100	100	179	228	406	ACTGGAACCAGACACAACCC	59.817	20	100	100	ACAACAGCTGCCAACCTGAA	60.396	20	100
nSSR_1099	CCT	5|C6068236:427-841|+	N/A	5|C5307426:733-747|+	4|C5385630:1089-1100|-	5|C6020269:739-753|+	5|C6362796:982-996|-	4|C7098450:796-807|-	4|C5473319:321-332|-	0.49	0.12	0.99	AGAGTTGGAGTTCTGCTCAACTTGTCCATCCTTTCCATAAAGAAACTCAAGACCAGTTTTAGTGGTAATAGAACCACTAACACTGTTCTGTTCAGGAAGTGAAGTTGCAGCAACAAGCTTGAAGTTGGAGAGGATGCAAGTTGTGATGGAGATGAAGACAAGAAGAACTTGGTAGTGTGAAGCTAGGCCCATTTCTTTGG	CCAAATCAAAGCCTTAGGACTGCAACTGTTCTCCTTGCCAATACAAAGTACTGAACTATGGTTGAGTGAGAATCTGGATCATAACATTCTCATACTAAAAAAAAACTATGCGATAAATAAATTTATTACATGAGAAACACTGCAATATTAAACAGGTATATGGCAGACACATGAAAAAACAAGAGATAAAAAAGCATGGA	TCAGGAAGTGAAGTTGCAGCA	60.134	21	100	96.83	TGGCAAGGAGAACAGTTGCA	60.107	20	100	100	164	291	454	AGTGAAGTTGCAGCAACAAGC	60.202	21	100	100	TGGCAAGGAGAACAGTTGCA	60.107	20	100	100	158	297	454	GTGAAGTTGCAGCAACAAGC	58.797	20	100	100	TGGCAAGGAGAACAGTTGCA	60.107	20	100
nSSR_11	AAAC	6|C6164901:552-975|+	6|C6146877:573-596|-	N/A	N/A	5|C5877104:472-491|-	6|C6136120:237-260|-	N/A	5|C5715157:661-680|+	0.49	0.38	0.99	ATGACCAGCTATGAAAAAAAATCTTTTTAAGTTAGAAGATCACTTAGAAATTAAAAAAGATCACTTAGAATTAAGGGGTTGGTTCCCAATCATTCCCAACTTCTTCTTCTTCATCTCTATCATTGGATCTAAGTTAGTGGCGTGGAGTGGGAGGAGTCAATGCAATGCTTGTTCCCCAACTCCAACTCCTTTCTTAGTTT	TCGGCTACCTTGCTTAGTGGGTAACCACTACACTACACTACACTTTCTATGATCTATATATACTTGATTACATTGATTGGAAGGTTAAGATTGGTATAATTATTAATTGTTCCTAGCTATTATTCTTATTCATTTGCCATGTGGCATGAATGGAAGAGCCGGCAAGAATGGAATGAGAGAGACAAGACTCTTCTAACAAG	AAGTTAGTGGCGTGGAGTGG	59.965	20	100	100	ACCCACTAAGCAAGGTAGCC	59.381	20	100	100	116	330	445	GGAGTGGGAGGAGTCAATGC	60.107	20	100	100	ACCCACTAAGCAAGGTAGCC	59.381	20	100	100	103	343	445	GAGTGGGAGGAGTCAATGCA	59.385	20	100	100	ACCCACTAAGCAAGGTAGCC	59.381	20	100
nSSR_1100	CCT	5|C6091084:360-774|+	N/A	5|C5128725:391-405|-	5|C5344746:389-403|-	N/A	5|C6275860:468-482|-	N/A	4|C5687481:206-217|-	0.4	0.38	1	AGCCTATAACAGGTAAACTAGAAATGACTAATATTTTCACTTGAAGCACTTGGCATCCAACAGGGCTTCTCCTTCATAGAAGGGCTCCAAGTCTTCTATCATAGCATTGACGCGTTCCTTTTGTGTGTTATCAGTTATATCAATCTTCATCCATTCGTATAATTCCATGTCAAGAGGATTCTTTGGTTTGGGTTTAGGTG	CAGCAACCTCATCAACTTTAGGCTTTGCAGGCTCTTTGACAATATACTTCTTGGCCTCTTTCTTCAGTTGTTTTGGCTTAGATTGAGGATTTCTTTGAGACTGCATTAATGGTTGCACATATGGTGTCTGCTCTACCTTACCCATCACCTTAGAGAAGTTTGGTTGGTTAACCATACTCCAGAAGTATCTCTCAACATGA	TGACGCGTTCCTTTTGTGTG	59.625	20	98.75	100	GTCAAAGAGCCTGCAAAGCC	60.039	20	100	100	148	307	454	GACGCGTTCCTTTTGTGTGT	59.624	20	98.75	100	GTCAAAGAGCCTGCAAAGCC	60.039	20	100	100	147	308	454	CCAACAGGGCTTCTCCTTCA	59.598	20	100	100	GTCAAAGAGCCTGCAAAGCC	60.039	20	100
nSSR_1102	CCT	5|C6146619:589-1003|+	5|C6232739:1771-1785|-	5|C5101075:230-244|+	5|C5367312:822-836|+	4|C5813325:229-240|+	4|C6349164:841-852|+	N/A	N/A	0.47	0.25	0.99	ACACCTGCAACACTTCATCATTCATTGAAGAATTTAAAGATGGAAACACTGTGTTTACATTAAGTAGTTCTGGGCCATTCTACTTCATCAGTGGAAACCAGGAGAATTGTTTGAAGCATGAGTCACTTGTGGTGGTGGTAATGGGGGAGAGGAGCAATGCTACTGCACCAAGCTTGCCACCTTCTCCTTCAATGGCTTCA	GAATCCATTATAGGCACACCAACAACATCACCATCAGTAGAAACTATTTCTCCTCCAAGTGCAGGTTCTACAATGGTGATGAACTTCATGACCTCAGTTGGGGCTCTAATTGGTTCACTTCTCTGTGTTTTGTAATGAAAGAATACATGCAGTTGAGTGTGGTTTGTTGTGAGTGAGATGTATTTTGGCTATTGGCTAAA	AGCTTGCCACCTTCTCCTTC	59.963	20	100	100	GCCCCAACTGAGGTCATGAA	59.962	20	100	100	149	370	518	GGGGAGAGGAGCAATGCTAC	59.892	20	99	100	GCCCCAACTGAGGTCATGAA	59.962	20	100	100	176	343	518	AGCTTGCCACCTTCTCCTTC	59.963	20	100	100	TAGAGCCCCAACTGAGGTCA	59.884	20	100
nSSR_1103	CCT	5|C6160651:423-837|+	3|C6068362:475-483|+	6|C5244267:412-429|-	3|C5382850:316-324|+	5|C6066149:982-996|-	N/A	N/A	N/A	1.2	0.38	0.98	AGCAAATAGCCCCAATCGTATGCTTGAACAGGCCTCCAGGAGAAATGGATTCAATCCAAAAACACTGATCGTGATGGGCTCTATATGGTTGCTTTGTGATGCGTGCCACGCGTCGCCCATCATGATCGAGACCTTCTATAAATATCCCTCGTTCTTAGGGTTTTGTAAGGGTTTGATGGAAAGAATCTCACTGCCCGCCG	CTTCTCCTCCTCCTTCTCCCAGCCTTAGCACCTTGCTTTCGCCTCTGCCATGCTCGCTGGTTCCATGTCGTGCTGGTTGTGGATCCGGCAGCTGCCCCTCGACGTAGATGGCGGCATTGTTCCCTGTGTTCAACTCCATTTACAATCGTGATGGATGATTCCGGTGATCACGGTACCGCCGTCATGGATAGATAGCTACA	TCGCCCATCATGATCGAGAC	59.685	20	100	100	ATCCACAACCAGCACGACAT	59.963	20	100	100	187	312	498	GTCGCCCATCATGATCGAGA	59.685	20	100	100	ATCCACAACCAGCACGACAT	59.963	20	100	100	188	311	498	TCGCCCATCATGATCGAGAC	59.685	20	100	100	GTGCTAAGGCTGGGAGAAGG	60.107	20	100
nSSR_1105	CCT	6|C6036594:278-695|+	5|C6122091:415-429|+	7|C4969930:194-214|+	N/A	N/A	8|C6279086:391-414|-	N/A	5|C5752441:203-217|+	1.17	0.38	0.99	CAGCAGTTTAAACAACGTTGGAATGACTTGGCTTTAACTTGATATATATGAACGGATCATTAGGGTCAGCAGACTAGATAGCCGTTGAACTTAACTCCAGGCTGGCATCCAAATTTGAAACAACGGAAAGCTGGAGAGATGCCAGTCAGACCCTTTAAAACCAAAGGACCGTTGCACGCTCCCTCAGTTTCATAACACCC	CTCTCCTCACTTCCTTACAAGTTACAAGCACAAGCTCAAGCACGCACGTTAAAAGCAGTGCTTGGATTCCTCCTCCCTGCCTCTAGAGAAGAGGAAGAAGAGATGAACAGGGCAACGCCAAAGAAGCATGCTTTCAGTGAGGAAGAGATGGCAGTCGATGATGGCTTGGGGTACCCAAAAGCCTACGCAAAGCTATGCCG	TCCAGGCTGGCATCCAAATT	59.958	20	100	100	GGAGGAATCCAAGCACTGCT	60.035	20	100	100	196	295	490	TCCAGGCTGGCATCCAAATT	59.958	20	100	100	AGGAGGAATCCAAGCACTGC	60.035	20	100	100	197	295	491	AGAGATGCCAGTCAGACCCT	59.958	20	100	97.5	GGAGGAATCCAAGCACTGCT	60.035	20	100
nSSR_1108	CCT	6|C6209576:1915-2332|+	5|C6136505:417-431|+	5|C5340341:2500-2514|+	N/A	N/A	5|C6056178:338-352|-	N/A	5|C5423819:191-205|-	0.4	0.38	0.99	CGGCGGAGATAAGAAGATGGGTACCTTGATCTCGGAGATCACGTAGGCCATGTTGGACAGGAAGGCGAGCCGGGAGAAGAGCTTGGTCTCGTACCACGAGGTCCGATTCAAAAGCCTGGAGAACGAGTCACGATCCCACTCGCTCCTCTCATCGTCCTCGTCCTCCGAGCCGTAGCTCACCCCGCAGTTGTAATCCGATC	CCCTCTGCTGCCGATCCCTCCACCGCCTCCTAAGCTCCATCAGCCTCTCCACCCAGTTGGCCCGATTCTCCGCACCGCCGCCCGGATCGTCCTCCGTTTCGTCCGGATCCACCATCTGCACGCCGTTCCCGTGCTCCTCCGAGTCGAACAGGAAGGATCGGAGAGAGGAGGGGAGGATCGAGCCGGAGAACCCAAAGGGG	CACTCGCTCCTCTCATCGTC	59.971	20	98.75	100	ATGGTGGATCCGGACGAAAC	60.108	20	100	100	197	336	532	TCACCCCGCAGTTGTAATCC	60.036	20	100	100	ATGGTGGATCCGGACGAAAC	60.108	20	100	100	157	376	532	CACTCGCTCCTCTCATCGTC	59.971	20	98.75	100	GATGGTGGATCCGGACGAAA	59.823	20	100
nSSR_1109	CCT	7|C6045806:316-736|+	N/A	7|C5045651:326-346|-	N/A	7|C6007717:630-650|+	8|C6388966:548-571|+	N/A	7|C5724429:483-503|+	0.4	0.38	0.99	CAATCATCAAAATCAACTACTAAACCAATGCATAAATTTAAAACAAATGAAGAGACGAAGAACCTTTGTATTCAGAGCTCTTGAGCAACCTCTCAATGAGCTTCCTCTCAATGACACTATCATCAACTGCCAAAACATGAGGAGGCTCAACCTCACTTCCATCACTAATACCACCACCACCACAACCACGACCACCACCA	CCATTCCCAAAATTACTACTTATTTTTGAAGGAGAAGAAGGAGACATTGTATCTCATGAACCACAAAACCAAAAAGAGGTTGGTGAGGAGAAAAGAGAAGGAGCCCATTGGAGAAGAAGCTAATCTAAGATTTATAGAAAAAGAAGAGAAAGCATTGAAGGAAAGTAAGCTTGAAAGATATGATGATCAAATCCATGAAC	ATACCACCACCACCACAACC	59.888	20	100	91.25	TCTCCAATGGGCTCCTTCTC	58.792	20	100	100	168	367	534	ATACCACCACCACCACAACC	59.888	20	100	91.25	CTCCAATGGGCTCCTTCTCT	58.789	20	100	100	167	367	533	ATACCACCACCACCACAACC	59.888	20	100	91.25	TCTCCAATGGGCTCCTTCTCT	60.274	21	100
nSSR_111	AACA	6|C6222180:3868-4291|+	5|C6197081:452-471|-	6|C5119191:252-275|+	5|C5132885:313-332|+	N/A	5|C6378892:878-897|+	N/A	N/A	0.49	0.38	1	GTGACCACCAAACCTATCTCCAGCACTAACTTGATATCATATACCTAGAGTAAAGAGACCTACCTCATCACTCATCAGTATCATAATAAAAAGACAGCCATAAAACATCATATCATTATTTTATTATCACACCAAAGACAGTGTTCCCTTCTCTCCCAAAGTACACAAACTCGGTTGCATAAACAACACGAAACATATAG	TCATAATATAACATTACATTAAGCTTAAAACAGCAACAAGATCAGACCAGCCTCTTGGAAACACACAACCTATTTACATCCATGCAGCACTCTTCTTGAAACTCAAACCATTATTCAACGATGATGGTTGCTCCTGGTCTCCCCACTATAAAGCCTACACACATCACGTCCCATATATTCAAACAAATAAAACCAAAACA	CAGTGTTCCCTTCTCTCCCA	58.648	20	100	100	TGTGTTTCCAAGAGGCTGGT	59.449	20	100	100	151	338	488	ACAGTGTTCCCTTCTCTCCCA	60.415	21	100	100	TGTGTTTCCAAGAGGCTGGT	59.449	20	100	100	152	337	488	ACACCAAAGACAGTGTTCCCT	59.436	21	100	100	TGTGTTTCCAAGAGGCTGGT	59.449	20	100
nSSR_1110	CCT	9|C6206610:127-553|+	8|C5823633:255-278|+	N/A	8|C5265394:342-365|+	8|C6086681:825-848|+	N/A	9|C6998494:423-449|-	N/A	0.49	0.38	0.99	CCCCTAAAAAAACTAATAATTAATGTGGAACCAGAGTGACGAAGCCGGCACTCCCGCGCTCCACGGCTCCTATTACGCCAAGTGTACACCAAACCAGTAGAAGTTCTCGAAACCCTCAAAAATCCCAATCGAAATCCTTCGATCTCGATCCATGGCTGGTCTTCTCAAGAAGGTCTGGGGCTCCGTCCTCACCCGTTCGA	CCCCTCGAGCCCCGACGGATTCCCACGCCGCCGCCTTCGATGACGACGCTTCCATGGGCGCCTTCGATCGGATACCGACCGACGTTTTCATGCAAATTCTCAAACTTCTCGGGCCGAAGGAGGCTGCGAGGGCTTGTGCTGTTTGCAGGGCGTGGAGGTTCTTGGCCTCTGATAACCGGCTCTGGATCTTTTTCCTCCAG	TCGATCCATGGCTGGTCTTC	59.534	20	100	100	CGGCCCGAGAAGTTTGAGAA	60.32	20	100	100	199	270	468	CGATCCATGGCTGGTCTTCT	59.533	20	100	100	CGGCCCGAGAAGTTTGAGAA	60.32	20	100	100	198	271	468	CGATCCATGGCTGGTCTTCT	59.533	20	100	100	TTCGGCCCGAGAAGTTTGAG	60.32	20	100
nSSR_1113	CGA	6|C5988036:48-465|+	4|C6217617:554-565|-	N/A	7|C5364900:1147-1167|+	8|C5949091:424-447|-	N/A	N/A	6|C5747875:1452-1469|+	1.33	0.38	0.98	TGAGAGACGATCCAACGCCGATGGCGATTGCGGGGCCGGCGCCATTGATGAGATTCTTGGGCTTGGGAATGGTGGCGGCCATGGAACTAGGGAGAGAAGGGTTCAAGAAGCGGAGAGCGCCATTATAGGGGAAACAAGAAATCCAAGAAGACAAGGAATCAATGGAGAAACGGACCAGCGATCGAAGGAGAGGGAGAGTC	AGACGAAGACGTCGGTGTGTTTTGTCTCCTCCCTTTCTCTTCTCTTGCTGGCCTTCTTTCTTTTTGTATTAATATTATTTAAACCTTTTTCACAAATACCACCTTGGAATCTTCCTCATTTTCAGAAAACTCCAACACTTTTTCTTTTTTCTTTCTTTCTTTCCATTATTACATATTTATGCCATATATTCAAGTTAAGG	CGGAGAGCGCCATTATAGGG	60.109	20	100	100	AGACAAAACACACCGACGTCT	60.135	21	100	66.67	135	157	291	CGGAGAGCGCCATTATAGGG	60.109	20	100	100	AGGGAGGAGACAAAACACACC	59.857	21	100	91.67	142	157	298	GACCAGCGATCGAAGGAGAG	59.97	20	100	100	GAAGGCCAGCAAGAGAAGAGA	59.722	21	100
nSSR_1117	CGC	6|C6153339:716-1133|+	6|C6124217:574-591|-	N/A	N/A	6|C5988261:256-273|+	N/A	9|C6742451:279-305|-	4|C5580647:264-275|+	1.6	0.38	0.98	AGTGAACAAAGGGGGAGTGATCGGACGGCTGAGAAGATAGAAAGAAGGAAATCAACGGTGATGGAGGGATTACCGGAGGAGGAGGTTTGGAGATGCCGGAAACACCAGTCGGTGACCCCGTTCGGCGTTTGCCCCTTCTGCCTCCGCGACCGCCTTCGTCTCCTTTGCCCCGACTGCGCCCAAGCACGGCCCTGCACGTG	CCCATCCATCTCCTCCTCTTCTTCTTCCTCGTTCTCGTCCTTCTCCTCCATTGATCTCGTCCGATCCTCCTCCGTCTCGGCAATCGGCGCCGTCGGCCGGGTCTCCAACCTTATTGATAGCGAGCAGGCGTTTCCCCGGTCCCGATCTGTCGCGATCCCATTTGCTCGCAGGCGAGCGGTGGCTGGGGATCCGGCGAAGC	GAGGTTTGGAGATGCCGGAA	60.035	20	100	100	GGAGGAGAAGGACGAGAACG	59.547	20	100	100	186	281	466	GGAGGAGGTTTGGAGATGCC	60.107	20	100	80	GGAGGAGAAGGACGAGAACG	59.547	20	100	100	190	277	466	AGATGCCGGAAACACCAGTC	60.322	20	100	100	GGAGGAGAAGGACGAGAACG	59.547	20	100
nSSR_1118	CGC	7|C6204104:1409-1829|+	10|C6034306:260-289|+	N/A	7|C5340774:628-648|-	10|C6031957:1083-1112|-	N/A	7|C7112228:394-414|-	N/A	1.47	0.38	1	CCCCAGTCCACCCTCTGCACCTTTAACCCTAGTAATCTGTCTTTATCTCATTGGTTGGTCCATAGCTCTCCCTCTCTCGGCAGATGAACGGCAGGTCCTCGGATGGAAACCAGAGAGCGCCAGCACTCTCACCGGACAACCAGCGGGGGCGGCAGTGAGCTCTTCATCTGCTTCACATCTCGCCCCTCATCCACCTCCTG	CATGCGTGTCCCCTCATCCAAGTCCCTCATGAGCCCCGGCCGTGCCGCCGCGCCCTCCCTCTCCTCCTCCCTCAGCCGGCGCCTGCGCAGCAGTGGCAGCGTTAAGGGCGGCGAGCAGTCCCCCATGTTCCCCGCCGGCGTGACGGCTCGGAAAAAGGGATGCGCTTTCGAGGCGGCGGAGCCGTCGTCGCCGAAGGTGA	TCCCTCTCTCGGCAGATGAA	60.033	20	100	100	GACTTGGATGAGGGGACACG	60.108	20	98.75	100	177	268	444	CCCTCTCTCGGCAGATGAAC	59.896	20	100	100	GACTTGGATGAGGGGACACG	60.108	20	98.75	100	176	269	444	GGTCCTCGGATGGAAACCAG	60.108	20	98.75	100	GACTTGGATGAGGGGACACG	60.108	20	98.75
nSSR_1120	CGG	5|C6092814:406-820|+	N/A	N/A	N/A	4|C5909681:604-615|-	4|C6263042:585-596|-	5|C7072948:251-265|+	5|C5724743:293-307|+	0.49	0.38	0.99	CGACTTAATATAATCCCTATTGCTCCTATATATAAAACCCCATATTCGCTTTACCTCTTTCAAAGAAATCTCCCTAATTTCTTGGTTCTTTTTGGTCTTCGTTTCCACGATGACGATGGTGATGATGAGTTCTCGGTCCGCTGGATCACTTCTGAGGCAGCTCGGGCCCCGCCTCTTCTCCACGGCGGTTGTCTCGCGTA	CAGAGCCGGCGCAAGCGCTGCTCTATGGATCATCGAAGTTCTCCTCCCCCGCGCGCGCACCGGCTCCGTGGGTGAAGTTTCTATCGGTGCGGATGGCGAGCACGTCAACGCAGGCCCAGGAGGAGGTCGGGCGGCAGGAGGAGTCGGTGACCACACCCGGCGGTGAGAAGAAGGAGGTGGCGAGTTACTGGGGCGTGGCT	CCGCTGGATCACTTCTGAGG	60.179	20	100	100	GCCATCCGCACCGATAGAAA	60.532	20	100	100	175	337	511	GCTGGATCACTTCTGAGGCA	59.749	20	100	100	GCCATCCGCACCGATAGAAA	60.532	20	100	100	173	339	511	CCGCTGGATCACTTCTGAGG	60.179	20	100	100	TGATCCATAGAGCAGCGCTT	59.245	20	97.5
nSSR_1121	CGG	5|C6096950:357-771|+	N/A	N/A	4|C5251966:492-503|+	8|C5691947:205-228|+	N/A	7|C7131858:331-351|-	8|C5701721:485-508|-	1.62	0.38	0.97	TAATTTCGGACAAAATTTGGTTAGTTTATATATAGAATTCATACATATCAACTTAATTATCTTCAAATATAATCAAAATCCAAGAACCCTTCAACCAAGTCCTGAAACTCAAAGCTTGAAGAGTTGCCAGAAGTTCCATGAGAAACTCGTTGATCAAAGAAGCCATTGCAGGGAGCTCCACTCTCCTCCACTGCTGGCGA	AGCAAGATCAAAGCCATCCGACAAACAGAAGTTACAAGAACAGTACTGCTGTTGTCCACCATTGCAGACACCTGCTGAAGAACCCAAGAACTCCCAAGGATAAGAAGCATTATATGATAATGGAGTCTGATAATCAACTGGCTCTGGCTCTGGCTCTGGCTCTATAGCCATTATCTCTTTTCCCTTGACAATCTCATGAT	GAGCTCCACTCTCCTCCACT	60.324	20	100	97.5	TGGGTTCTTCAGCAGGTGTC	59.891	20	100	100	129	372	500	GAGCTCCACTCTCCTCCACT	60.324	20	100	97.5	CAGGTGTCTGCAATGGTGGA	60.251	20	100	100	117	372	488	GAGCTCCACTCTCCTCCACT	60.324	20	100	97.5	AGGTGTCTGCAATGGTGGAC	60.251	20	100
nSSR_1126	CGGTC	5|C6189218:927-1351|+	N/A	4|C5335855:674-693|-	4|C5117149:340-359|+	N/A	4|C6357604:544-563|-	4|C6933754:402-421|+	N/A	0.4	0.38	0.99	CGCGGAGGAGGAGACCCGCAAGCCCGCAGTTCGTCATTGTAGCATTTCGTCAAACACTTCCCCGGCAGTCACTCAAGTAAAACGAATACGATGATATACGAATATCAAGAATTACTTCAAGATTCGCGCAAGCGTTCGAGGTGAATAAATGGCTACGATAAAGCCTTTACTTATTATAAAAAAAACGTTATCTTTAGGTT	ACTGAACCGATTCAAGGACGTATAAACCCTAGAAAACCTCTCTCTCGTTCTCTGTAAGCATCCGGCTGTCTGCTCGCGGATCAGCTATCCGGCAAGGCGATGGGCAAGAGGAAGCGAGAGGAAAAGGGCAAGCTTGAGCATGGAGACGGCCAGCAGCACTGCCCTTCTACTATCTTTGTTTCTAACCTCCCCTATACTTT	GCAAGCGTTCGAGGTGAATA	58.644	20	100	100	GCCTTGCCGGATAGCTGATC	60.953	20	98.75	100	196	327	522	CCCGGCAGTCACTCAAGTAA	59.68	20	100	90	ACGTCCTTGAATCGGTTCAG	57.92	20	100	100	186	260	445	GCAAGCGTTCGAGGTGAATA	58.644	20	100	100	GCCTTGCCGGATAGCTGAT	59.928	19	98.67
nSSR_1127	CGT	5|C5798384:6-420|+	5|C5969576:189-203|+	N/A	5|C5330878:608-622|-	5|C5831172:285-299|+	N/A	N/A	7|C5745413:482-502|+	0.8	0.38	0.99	ATTCCCAATATACTCACCCTTCTCTAACCACACATCGCCTCCTTCTTCCTTCCTCCCCCTCCTCCTCCCCAATCTATAAATATAAATATCAAACAAATCAGGGACTCAAAACGGATTTCTTGATTTCTTGATTGATTGATATCTTAAAACCCAATAAACAATGAAGCCGCAACACAGTGACTCCACCGGGACGGCGGCGG	CATCGCCGGGAGCGTCTCCGGAGCAGCGCCAGGCCGTGCCCCCGTCCTCGGCGGTGCCATCGGGTGCGGCCGTGGAGGAGCCGGCCCTGCTCCGCGAGGGTGGGCAGGAGTCCGTCTCCGTGGAGCGCCGCGGCGACCACTCCGCCGTTTGCCGGTGGACCGTCGCCGGGTTTCCCCGGGTCAAGGCCCGCGCCCTATGG	Primers not available
nSSR_1128	CGT	6|C6074148:366-783|+	N/A	5|C5193519:401-415|-	5|C5244522:549-563|-	3|C5696379:183-191|-	N/A	N/A	6|C5657819:195-212|-	1.1	0.38	0.98	CCTATCTCGCCGTCGCGACCGGTGGTTCAACCTCGCCATCGGCGACCTCCCGCTCGCCCTCGACCAGCCCAACTTCTGGCACCATGGCTTCATGGAGCCCATGTTCGTTGACATCCTCCTCTCCTCCTTCGAGTCTCTGGATCCCGATCCGGATGCCGTCATTGAGCGCTGGACTCTCCAGTTCCAACCCTCGTCATCGC	CCTCTCTTTCTGGGAGAATCTACAAGAAGACCATTGTACTGCTGAGATCGCTGTACTCGCTGCTCCGATTCCTTCCTGCGTACAGAGTCTTCCGCACGCTCTGCACTTCCAACCCGTCCTGCAACTACGGCATAAGCTACAAGGTCTCCTCCTTTGCGGAACCCTTTTCCCGGGACGAGGAACGGGCTTTCAAGCCCTAC	CTCCAGTTCCAACCCTCGTC	60.037	20	100	100	GAATCGGAGCAGCGAGTACA	59.899	20	100	100	114	375	488	CTCCAGTTCCAACCCTCGTC	60.037	20	100	100	AATCGGAGCAGCGAGTACAG	59.899	20	100	100	113	375	487	GTCATTGAGCGCTGGACTCT	60.108	20	100	100	GAATCGGAGCAGCGAGTACA	59.899	20	100
nSSR_1130	CT	6|C5830228:85-496|+	5|C6177619:848-857|-	N/A	N/A	5|C6011135:1000-1009|+	5|C6219154:241-250|-	5|C7103784:247-256|-	5|C5723201:408-417|-	0.37	0.25	1	GTATAGTGTTTGAAGGTTTGGTTTGCTTGTTAGACTATATATATATAGCTGGCATGAATGAATGGCTGGAGAGAACTAAGAGAGAAGGCTGGAAGAGATACAATTAATACAAGATAGAGAGCAATGCATGCAGCACAAGGCTCGCCGGTTCTCTCGCTAACCCACGTCTGAGATTCCTCCATTGGAGTCTCTTTCTCTAA	TAGTAGGAAAACCACGTGGAGTTTGATGCTCATTTGAAATCTCATGAGCATCTATCCTTATCTTAATGAAAGGAAAACAAGTACTTTGAGAAGATACTAGCAAGCATTTGATCTTGATTTTCATTGGTTTTAGAACAATATGAAATGTTGCAGAGAATGATGAAGTTGGATAAGTCCAAAAGTGAGAAAAGATTAAGTAT	GGCATGAATGAATGGCTGGAG	59.66	21	100	100	AGCATCAAACTCCACGTGGT	59.891	20	100	100	192	134	325	GGCATGAATGAATGGCTGGA	58.594	20	100	100	AGCATCAAACTCCACGTGGT	59.891	20	100	100	192	134	325	CTCGCCGGTTCTCTCGCTAA	61.99	20	100	100	AGCATCAAACTCCACGTGGT	59.891	20	100
nSSR_1131	CT	6|C5883778:88-499|+	7|C6160689:371-384|-	6|C5198025:428-439|+	7|C5349208:187-200|+	6|C5962189:532-543|+	N/A	8|C7051086:338-353|+	8|C5305811:188-203|+	0.83	0.12	0.98	TAATCTAATCCAATCCGAATCTCAACGCGAAAAGCGAACAGTGTCACTGAAACCACGGTGAATGTAAGAAAACTATACACCACCGCCATCACAGTACTCCTCGCTTCCCCTCTTCGTCTCCTCCTTTCAATATAAGAGAGTTTCATAGATTAGGTGGAGAGAACCATCTCCGTAGGTGAACCGTTGTTTTCGTCTCCAAC	ATCTCTCATCGTCTATACATCAAAACCCTAACCCTAACCCTAATCAGGAAGAGGAAACGAAAGAGAAAGGAGCAAGAGAAGTACCTCAATGGCGGACCGTGTGTATCCGTCGGCCAAGCCGAACCCACATCCGCCACCACCCGCCGCCAACGGAGTTGCCGGGGGACCACCGTCGTTCCCCGCCACTAAAGCCCAGATGT	CCGTTGTTTTCGTCTCCAACC	60.003	21	100	100	GGTCCGCCATTGAGGTACTT	59.748	20	100	100	130	267	396	CCGTTGTTTTCGTCTCCAACC	60.003	21	100	100	GATACACACGGTCCGCCATT	60.461	20	100	100	139	267	405	CCGTTGTTTTCGTCTCCAACC	60.003	21	100	100	ATACACACGGTCCGCCATTG	60.743	20	100
nSSR_1134	CT	6|C5985228:189-600|+	N/A	6|C5037787:251-262|-	6|C5298538:652-663|+	7|C5981571:351-364|-	6|C6396384:1900-1911|+	7|C6878504:310-323|+	N/A	0.47	0.25	1	AGTCCTTGAACGATTTGCGCGCGAAGACGACACACATCTCCCCTCCTTGCACCAAAGCACCACAATCTCATCCAAAAACACAACGAATGCAAGGGAACGAGAAAGAAAACCCAAATAGAAGCTCAATTGAAACCCTAATTCCTCCCTCTCCGCTCGTGCTCCAGTGCTCTGGCTCCCACTTTAACCCCTCTCTATCCCCC	CATGGTGGTTGCTTTGAAGGACGTCTACGGGCTGACACGAGTGAGAGAGAAAGCGAGAGGGTTCTAAACACACGTGTAGTGGAAGTGGCACTTCCGTCTAGTTCGCGCCGCATCACCCAGTTCCAAAATGTAACCGTTTTTCCCGGAAAAGTTCCCTCTTTGTTTCTTCTTTCGGGAAGTGACCCAGGATGTGGGGTAAG	CTTGCACCAAAGCACCACAA	59.825	20	100	100	GCCCGTAGACGTCCTTCAAA	60.038	20	100	100	199	233	431	ACGAATGCAAGGGAACGAGA	59.68	20	100	98	GCCCGTAGACGTCCTTCAAA	60.038	20	100	100	162	270	431	GTGCTCTGGCTCCCACTTTA	59.675	20	100	100	AGTGCCACTTCCACTACACG	59.966	20	100
nSSR_1136	CT	6|C6000912:198-609|+	N/A	6|C5268326:617-628|-	N/A	6|C6059061:417-428|+	N/A	8|C7138014:1291-1306|+	8|C5736243:758-773|+	0.98	0.38	1	AGTTGGCATTATAATTGTGTGCAAGTTAATTTTAGTTATTAATGAGGTGAAGTTCACCTACCTCACAAGAACATGCTTGCATATGGTCTATATTATATTTCACCACTAGCCAACACTTCTGAGAAAATTTTAAGGCAGAAACCTTGGTTTTAACATCCAGTGGGACAAAGTTATCAAACCTCCAAACTAATTATTAAGTG	CAATGGGCAATGGGAGCTATGATGTGATTGTGGTTGGTTCTGGTTATGGAGGTTCAGTAGCTGCATGCAGGCTATCAACGGCAGGTGCAAGAGTCTGCCTGATTGAGAAAGGGAAGCAATGGGATGCCCAGGACTTCCCCACAAACAGCTTTAACATCTTGGCTGCCTCAAAGGTGGAGTTTAGGAAATGGGGACTGGGT	ACCACTAGCCAACACTTCTGAG	59.962	22	100	100	TTGATAGCCTGCATGCAGCT	60.107	20	100	100	189	298	486	ACCACTAGCCAACACTTCTGA	58.953	21	100	100	TTGATAGCCTGCATGCAGCT	60.107	20	100	100	189	298	486	TCACCACTAGCCAACACTTCT	58.953	21	100	100	TTGATAGCCTGCATGCAGCT	60.107	20	100
nSSR_1139	CT	6|C6023522:103-514|+	6|C6143417:246-257|+	6|C5086275:324-335|-	N/A	6|C5772169:328-339|-	N/A	7|C6974136:514-527|-	N/A	0.4	0.38	1	GCACCAAAGGGCACCATTATCGTAAATACTTCATCCGACCAGGGGCAATTCAGTCACAAAAAAATAAACACAGCCAATACTACACACCCACCGACGCACCAAGCTTTCGAACAAACCCCAACCTCAGTGGCAAATTCGTGAATCAATTCATCTGCAAGGGCATTTCATAGTTCGTACTGCTCTAGATGTCCTCGTGCTCG	TCTCTCTCTCTATATTTGGATACTCCTTGCTTTTCTTTTGATAATTCCGCTAAAAAAAGGGGGAAATCGAGGAGCGGAAGCGAGCCGTTAGGGTTGCTGGGACTAGATCTGGTGATCTTTTGCTCTTCCTTGATGGTATTTGTGTAGGGTTTTGTGATTTCTTGTGGTTCTCGAGTGTTTGGAGCATTCGAGTGTGTGTT	CGCACCAAGCTTTCGAACAA	59.971	20	100	100	CTTCCGCTCCTCGATTTCCC	60.531	20	100	100	198	196	393	ACAAACCCCAACCTCAGTGG	60.106	20	100	100	CTTCCGCTCCTCGATTTCCC	60.531	20	100	100	182	212	393	GACGCACCAAGCTTTCGAAC	60.384	20	100	100	CTTCCGCTCCTCGATTTCCC	60.531	20	100
nSSR_1143	CT	6|C6084176:91-502|+	4|C5971752:362-369|+	N/A	5|C5325118:836-845|+	4|C6049515:778-785|+	N/A	7|scaffold32679:767-780|+	N/A	1.17	0.38	0.98	TCAGAGAGCGTAAAAGAGAGTAGTTAATGCGGAAAGAGGTTGTCTGTAATGTTTGATAGCCGCTAGGCATTATAGCGATTGCAGCACACTTATGATCTGGCCACCCTTGTTTGAGGGTTCAAGATACTGATAACAAGGAGCATGCGCTGTCTGTCTTCTTTATTAATTCACACAAGTTTTTCTTTGATAAATATCATTGA	CAAGTGCCAAAATGTCTTCCTCTGCAGAAGCAGCCAACTTGCACTTCATGATCCAAAAAAAGTAAGCAGAGAGTTCAGTGATTGAAGGAAGGATATTATTAGCTAGAAAGAAGATGAACACAACTGATAATTATCGATTCTGATTTCCTATTTTAAATGCACCCCCCAATTGTCAGTCTGACAGACTTGTTACCTTAATA	TCTGGCCACCCTTGTTTGAG	60.179	20	98.75	100	GTGCAAGTTGGCTGCTTCTG	60.318	20	100	100	161	185	345	TCTGGCCACCCTTGTTTGAG	60.179	20	98.75	100	AAGTGCAAGTTGGCTGCTTC	59.613	20	100	100	163	185	347	TCTGGCCACCCTTGTTTGAG	60.179	20	98.75	100	GAAGTGCAAGTTGGCTGCTT	59.613	20	100
nSSR_1144	CT	6|C6084442:255-666|+	N/A	N/A	4|C5238750:304-311|+	4|C6083799:522-529|+	4|C6365274:986-993|-	4|C7138542:484-491|+	4|C5632571:576-583|+	0.75	0.25	0.99	CCGGCGGCGACGGGAGAAGAACTATCTGGCGGCGCACGGCGGCTATAACCGCCTCCCTCCCCCTCCCAATTCTAAGGAGCTTGAGGCCATCCCCTCCAAACTTCGCAAGCTCATGCGATTCAAGAACCCTCCTCCCTCTCCCTCCGGTGAGCTCCCTCATCTCTTCCCCTCTCCTTGAGAATTAGATCCATCCTCTTACG	CCCTTCTCCCTTTAAGGTTCAAGTCCTGGAGATGCGCCTCCGGGCAAGAGGAAGGGACCTGTTGCTGTTGAAGCGGTGAGGATTCTCCCAGGTTTTGTTATTCTTGAGAAACACAGTGATGATTTGATCCTCTTGTCTTTCTTTTTCACGTTGCTTTCTGGAAATTAAGCGTTTTATGATGATTTTAGCTGGCATTCTTT	AAGAACCCTCCTCCCTCTCC	59.957	20	100	97	AACAGCAACAGGTCCCTTCC	60.179	20	99	100	160	321	480	AAGAACCCTCCTCCCTCTCC	59.957	20	100	97	CAGCAACAGGTCCCTTCCTC	60.322	20	99	100	158	321	478	TCCCCTCCAAACTTCGCAAG	60.251	20	100	100	AACAGCAACAGGTCCCTTCC	60.179	20	99
nSSR_1146	CT	6|C6087674:60-471|+	3|C5922474:328-333|+	5|C5326228:817-826|+	5|C5386442:893-902|+	5|C6018735:377-386|-	N/A	N/A	3|C5447531:194-199|+	1.12	0.25	0.98	AAAACCACCTAAGGGTCGGCTCGATTTTGAAGTGATGGAGAACTACAACAAAACCACCCAGTGTTCACCATGAATTAGGGAGGGGCTAAGTTGGAAAAACACTAAGATTTTCTGAAATATCCGAGGAAAGGGAAGTCGGATCAGGCCGACGATTAAAGCGTCAAAGTTAATGGCAACTTCACCCTTACGGGGAGTGTTCG	AGGCTTGGGTGCTCAACAAGTAAACTCAGGAGGTTCGATAAGAAAGTGCTTACAGATCCGACATATTGCATCGGGCGAGAGGGAACTATGAATATCCACTATGGCGATGTTATCCACCGCCGCGGATGAAGGTCCGTCTTCACCCTCCTACGCCCTAACACTTTGAGAGGAACGGGCCATTACTTGAAAAATCTATGTAC	TGGCAACTTCACCCTTACGG	60.251	20	100	97	CCTCTCGCCCGATGCAATAT	60.037	20	99	100	124	229	352	TGGCAACTTCACCCTTACGG	60.251	20	100	97	TTAGGGCGTAGGAGGGTGAA	59.958	20	98.82	97	200	229	428	TGGCAACTTCACCCTTACGG	60.251	20	100	97	ATAGTTCCCTCTCGCCCGAT	60.179	20	99
nSSR_1148	CT	6|C6092774:155-566|+	6|C6131997:328-339|+	N/A	6|C5083267:220-231|+	6|C6040971:331-342|+	6|C6151694:271-282|-	5|C6908732:292-301|-	N/A	0.37	0.25	0.98	CAAGTCTAGGAAAAGCCCAAACAAGGAAAGGCTGTACATGTTTTCCACTTGTTACTGTTTCTCTGGTTGCTTTTCACCACTCAGGTGGTAGGTTTCGTTGAACTTTGGAGAATGTTCTGTCACTAAAAAGAAGAAAAGATCACTACAAAACAAATGCTACAAAGTTGGTGGTGGACAAGACTACTACTTGTGGCCGGCTC	GTGTTTGATCAGTAGAGATAGATAGATAGATAGGGGGAGAGAGAAACTTTGAAGTGATGGACTCTTTTCTTTCTAAAGCTGCACAAACTCGTCCATATACTGCCTACCTACCTTGAAGACCATCTCATCTCATGCATAGACCTAGGAAACCACCCAATAATATGATCTTATTCTTGGGTGCAATATATGTTTATGTTGCA	TGCTACAAAGTTGGTGGTGGA	59.787	21	100	100	ATGGACGAGTTTGTGCAGCT	60.25	20	100	100	154	308	461	AGTTGGTGGTGGACAAGACT	58.787	20	100	97	ATGGACGAGTTTGTGCAGCT	60.25	20	100	100	146	316	461	TGCTACAAAGTTGGTGGTGGA	59.787	21	100	100	TGGACGAGTTTGTGCAGCTT	60.464	20	100
nSSR_1151	CT	6|C6111680:445-856|+	6|C5996004:220-231|-	N/A	7|C5248998:280-293|+	6|C5979217:294-305|+	N/A	7|C7061232:339-352|+	N/A	0.49	0.38	0.99	GGTGGACGCCATGTGTGCGTCGAGACGAGCTTTCCGGATTGAGATTGAGAGCGTGAATTCGACACCTATAGCCTAAGTTATGGCCGAAGAGAGAAGACGTGGACTTCCTCTGACCTCTAAACAACTGCCTCTACTCTCAACCCTGTCTGATCGCACTTGCTCATCCCTCTCAACCTTGATTCAATTTTCCTCCCCGAACC	CAATCCTCTCTTCCTCCGCCTTGATCCGATGGACTAATATGATCGTCAGAGAGTCCAGGGATCATCCCCGGACTTCTGACCGAGCAGGTCATTGCAGGCGCAGAGCCGTGGGATCAAGCGGGACGAATCATCAATTCCGATACCCTCGTCGACGGTTGGCCATCCACCAACTACTAGCTCCAGGAAGGAGTCTCCCAATA	ACCCTGTCTGATCGCACTTG	60.037	20	100	100	GGATCAAGGCGGAGGAAGAG	59.894	20	98.8	100	100	339	438	CAACCCTGTCTGATCGCACT	60.037	20	98.75	100	GGATCAAGGCGGAGGAAGAG	59.894	20	98.8	100	102	337	438	ACGTGGACTTCCTCTGACCT	60.179	20	100	96.25	AGGCGGAGGAAGAGAGGATT	60.032	20	100
nSSR_1156	CT	6|C6151687:776-1187|+	6|C6230857:337-348|-	N/A	6|C5352682:447-458|-	6|C5873526:312-323|-	7|C6126922:411-424|+	6|C6799389:339-350|+	6|C5711759:942-953|+	0.35	0.12	0.97	CCTAATTTTCTTTTTAACTTCTAATGCAGGTCCTTCTTTCTCATTAATCAACCTAATTCATGATAATGCCTTTTTTCACATCCAACCCTGGTTTCCTCCATAATTATGTTTAATAATAACTCACGTGATAAGTAGTCTCTACATGAGTTCTAGTCCTTTTGCATATATACCCAAACGACTTTATCATTTACATGCACGCC	TAATAAGCCGTGAGAGGGAAAAACTTGCAGTTTAGACCTCGTCTTTTCCAGAATTTATCTACTAATTGATCACGTGATATTCATCTCCTGCATGGCTGCATGAGTTGTGGATTTTTTGTAAAGTACCCCTGAGCTCTTCAAAATTATCATAGAAGCCCAATGTTTGTTCCTAAACATTTAACAATAAAGCTTTGTTCCTA	CCAACCCTGGTTTCCTCCAT	59.591	20	98.33	100	AGACGAGGTCTAAACTGCAAGT	59.371	22	97	100	175	281	455	TCCAACCCTGGTTTCCTCCA	60.7	20	100	100	AGACGAGGTCTAAACTGCAAGT	59.371	22	97	100	176	280	455	ACATCCAACCCTGGTTTCCTC	59.924	21	98.4	100	AGACGAGGTCTAAACTGCAAGT	59.371	22	97
nSSR_1159	CT	6|C6183322:1063-1474|+	7|C6007028:455-468|-	N/A	7|C5396764:2292-2305|+	N/A	7|C6330504:345-358|-	N/A	7|C5617515:340-353|-	0.4	0.38	0.99	AGTCGTACGAATGTTGGGGAATCCCTTCTGTTGGCAGATGGTTGGCATCTCGCTGGCAGCCCCGCTGGCACATGGTTGGCACCCAAGTGGGAGGAAGCTTGCAGGCTAAGTCATCGAGGTGTCGGTCAGGCCGAAAGGTATAAAGTGGGATGAGAAGAGAGGACGAGGGAACTCTTTCGGGCGGGCTCGGCCCCAAAACA	CATTCTCCCTAATACGCCCTACCTCATTTCCCTTTAATCCATGGAGTGTCCTTTCATACACTCCAGTGATCTTCCATCCCTGGAGAATGTTGTCTGACTTGATCGTCGGAGGGTCGGGGGTAAGATCCCCCGAACTTCCATTGTAGGACCCGGCCAGAGGAGAAGGTTGCGCACCCTCGCCAAGAAGGACCTCCAGTTCA	TGAGAAGAGAGGACGAGGGA	59.007	20	100	100	GACCCTCCGACGATCAAGTC	59.899	20	100	100	177	350	526	TGAGAAGAGAGGACGAGGGA	59.007	20	100	100	CCCTCCGACGATCAAGTCAG	59.899	20	100	100	175	350	524	GGAGGAAGCTTGCAGGCTAA	60.035	20	100	96.25	GGGAAATGAGGTAGGGCGTA	58.874	20	100
nSSR_116	AAG	5|C5888664:118-532|+	5|C6081522:353-367|-	6|C5158571:425-442|+	5|scaffold16814:924-938|+	N/A	4|C6236508:513-524|+	N/A	N/A	0.63	0.38	0.98	ACCTAAGTGCAGTTTGCACTAACACTGAGTAAGGAGATAGCCGCTAACCCGATAATGGAAACCTACCCTGTGCGCAGTCCACCACGCGTTAGACGTCAGGCGGGACGGGGAGGTTATTTGGAGGAGGAGAAGAACAGATTTGCAGGAGAAGAAGAAGCTGGGAGGTTATTTGGAGGAGAAGAAGAACGACTTTGGAGCAT	GAGAGCATGTTAGCCCATAGTCTTTTCCTTTCATTTTCATAGTCTATTCCTTCCATTTTCATTTTGTTGATGTTGATTATGGTTTGATTTCACTGTTTTTTTTAGGGTTAAAGCCATTTTTGGTCCCTGAAAAAAGGGCCAATGTTCATTTTCATCCCAAAAATTTAAAATTTGTTCAATTCGGTCCACATCAGCATATA	GCCGCTAACCCGATAATGGA	59.966	20	100	100	AGACTATGGGCTAACATGCTCT	58.687	22	100	100	199	156	354	AGCCGCTAACCCGATAATGG	59.965	20	100	100	AGACTATGGGCTAACATGCTCT	58.687	22	100	100	200	155	354	GGGACGGGGAGGTTATTTGG	60.107	20	98.75	91.25	AGACTATGGGCTAACATGCTCT	58.687	22	100
nSSR_1163	CT	6|C6189882:1064-1475|+	N/A	6|C5324560:895-906|+	6|C5383304:811-822|+	N/A	6|C6299558:468-479|+	7|C7064078:268-281|-	7|C5734971:1022-1035|+	0.47	0.25	0.99	CATAACAAACTATCAACAACCTCCATTGAAAGTAAGTAAGTAAAGGAGACTTATTGCTTGCATCTCCTTAGTTCCAAACCCTATACATGCATGCTTATTATTTGAACAACATCCATAAACAACATCAAGTCTTCCTAACCACATGCATCAACACTCAACCTTTACATCAACATAGGTTTATCCTTCCCACTCTCAAGCGC	CAGCTTAATCGCCAACTGAACCTCAATGACAACACACAAACTCTAGTCCTATCATCAACCTTGCCTGGTGATTATCAACATACATGAAAACTCACAAACATGCAAGTATATGAGGCTTACCCAAACAACCCTTTGAAGCATGATAAAAATCACTAGGAAAATAGAAACCATGAATTTATAAACTCATTCCCAAAACAGAC	ATCCTTCCCACTCTCAAGCG	59.461	20	100	100	TCACCAGGCAAGGTTGATGA	59.23	20	98	100	104	379	482	ATCCTTCCCACTCTCAAGCG	59.461	20	100	100	AGGGTTGTTTGGGTAAGCCT	59.142	20	100	98	165	379	543	ATCCTTCCCACTCTCAAGCG	59.461	20	100	100	TCACCAGGCAAGGTTGATGAT	59.645	21	98.08
nSSR_1165	CT	6|C6192790:995-1406|+	N/A	6|C5208559:380-391|+	6|C5362246:1082-1093|+	6|C5978771:258-269|-	N/A	5|C7134178:417-426|-	5|C5695295:202-211|-	0.47	0.25	0.99	CTGTCTTCTATCCCATCTAATTATCACTCCAATTGCCAGTCAGAATTAGTCTTTTGATCATCAGTTGAGCTTATTAGGTGCTGTTGAGTGTTTCATGATAAACGTTGAGATGTGTTCCTTATGGGAGCCTGCCATTGTTGTCCGTCCTCATGAGAACAAAGGTAACATGGCTCTTTCATGGTGAAGAACTCATGAGAGTC	TTCTCTGTTAATGTTTGTATTAGCAAATGCATGCCAGTGGTCCATGGGACCATCTTCGTTGTATATTTCCTCTTGAAGTAACATGGGGTGGTTTTTATGTGCCAGTTTATGTACACATTTAATTGGAACGTGGATTGTCATCTCTCAGTACCACTCCACTGAGTGTATTTACAGAACATGGGATGGTCTCCCCAAGGGAC	GCCATTGTTGTCCGTCCTCA	60.605	20	100	100	GGACCACTGGCATGCATTTG	60.109	20	100	96	125	330	454	TGCCATTGTTGTCCGTCCTC	60.605	20	100	100	GGACCACTGGCATGCATTTG	60.109	20	100	96	126	329	454	CTGCCATTGTTGTCCGTCCT	60.606	20	100	100	GGACCACTGGCATGCATTTG	60.109	20	100
nSSR_1166	CT	6|C6203654:481-892|+	6|C6244207:2309-2320|+	7|C5338273:1622-1635|-	8|C5338514:445-460|-	N/A	6|C6364608:708-719|+	N/A	N/A	0.8	0.38	1	AAGATCAATGAGTTGCAATTTTTAACATCAATTGATAAGTTTCCTGGTGTGTTTTTGTGTAGTTGAATGAGTTCAAGACATATAATTTCTCAATTCATGAGTTTTTTGTTGTGTTTATATTATTTTTTATTGTAATTGATGAAAAATTTATATAAAAACCCTGAAGAATTAATAACACCGTCTTTCCTTCCTTCAATTGC	AGATAAAGGGGTAGCAAAAGCATAATTTTTTCTCTTTTCTTCTTCTTCAATTTAAACTCCTTGTTTTCAATTCAGCCAATTTGTGACCCAATTGTTACAATTTTTGTTCTTTGGATTGGGATTCTGAACCTAGGATTCTTGGACTGATCCTTACCAGGATCCATATCCAAATGGGCATATATTCAGTCATCGAGGAAAGT	ACACCGTCTTTCCTTCCTTCA	59.234	21	100	100	TGGGTCACAAATTGGCTGAA	57.921	20	100	100	128	374	501	ACACCGTCTTTCCTTCCTTCA	59.234	21	100	100	TTGGGTCACAAATTGGCTGA	57.921	20	100	100	129	374	502	ACACCGTCTTTCCTTCCTTCA	59.234	21	100	100	TTGGGTCACAAATTGGCTGAA	58.607	21	100
nSSR_1167	CT	6|C6206874:1348-1759|+	N/A	7|C5216621:402-415|-	5|C5388702:864-873|+	N/A	7|C6299458:232-245|+	6|C7131360:1574-1585|+	N/A	0.75	0.38	0.98	GGCTTCCGACTCCTTCACAGCCATGTCTTGTGTTGTGTTTCCCGGGATGGACTCCGCCGGCTCGCCGCCGGGGAGTCCTAATTGCCCTGCCCACCAACGGTTCGCCAGACTGATAGAATTCCCTGAACGATCTACTGTTGGTACTGGCCCTGATACCACTGTTAGGTTCGGAGGCACCCTAAACTCGCTCTTGTGTTTCC	TTTTCTTCTACTTTGAGAAAGAGGATGAAGAATAATATATATATAAAATGAGAGAAAGCTAAGGAGAAAGAAGCACAGAGATGAAGGTTGGCTAGCGTGAAGGTGTTTGCTTTGTTTTTCCTTCTACTTTCTCTGTAGTTCTTATGAATTGATTTAAAGAAGTAGTAAACATAGATAGATTGTCATATGTTGCATATTAT	GGCACCCTAAACTCGCTCTT	60.036	20	100	100	AACACCTTCACGCTAGCCAA	59.892	20	100	100	147	372	518	GGCACCCTAAACTCGCTCTT	60.036	20	100	100	AAACACCTTCACGCTAGCCA	59.892	20	100	100	148	372	519	GGCACCCTAAACTCGCTCTT	60.036	20	100	100	GCAAACACCTTCACGCTAGC	60.11	20	100
nSSR_1168	CT	6|C6208618:218-629|+	6|C5716633:190-201|+	6|scaffold10648:1036-1047|-	4|C5090189:237-244|+	7|C5727591:275-288|+	6|C6285990:238-249|+	N/A	N/A	0.9	0.25	0.98	TCGCTCCAGACAACCGAGATTACAAGGACGACCCAAATGCGATCCACTGCCTAGAACTTACACCAATCATTCATATGAACGGACGAGGTTTGCCCACACGGTGGGGGCATCTGCTTACTCATCTCGGTGATCTAATGGGTGGCCGGATCATTGCCTCGCGATCAACACGAGGCTAGATCTTCTAATCGTTACCGTCCAAC	GCCTAGCTCCATGGCATTTTGCATTTAATCCCTTCGGTTTATCCAAGGTTACATGCGGATCCTCCACCTGTGAGAGAAGCACAAATTCCAGTTAAGTCCCAAGACTTTATGAAATTACGGATAAGTCCCTGACAACCCCAATTAACCCTAGTTAGGGCATTTGTAACGCCCCGGTTTTTCTTGGCGAAAAATAAATAAAT	GCGATCAACACGAGGCTAGA	59.899	20	100	99	GTGCTTCTCTCACAGGTGGA	59.318	20	100	100	137	357	493	CATTGCCTCGCGATCAACAC	60.248	20	100	100	GTGCTTCTCTCACAGGTGGA	59.318	20	100	100	146	348	493	TCATTGCCTCGCGATCAACA	60.391	20	100	100	GTGCTTCTCTCACAGGTGGA	59.318	20	100
nSSR_1169	CT	6|C6216896:2266-2677|+	N/A	6|C5342065:1613-1624|-	N/A	6|C6081221:1512-1523|+	N/A	5|C7130258:477-486|-	5|C5761643:889-898|-	0.49	0.38	0.99	CCTGCACCGACACCAACTATCTTTAGAAGGTCACCATCTGATTTTCCAAGGAGGCGGCGAAGCTCATTGAGCTTCTCTTCCGCACCATTTGAGTTGTGAACAGAGCCGTTTGAAAGAGGAACACTATTGGATCCTTCCACACTGCCAACCATCTTCTCCCTATCTGAAACCCTACAAAGTTTCAACCTTGACCCGTCTCC	CAATTTAACTCTGAAACTCTCTCTATTATGCCAATCTCTCTACGACTCCAATGGCCTCCCAAAATTCAATCTTCAAGATAGACTCAAACTCCCACAATGCTCCTAAAAATCCGATTTTTACAGGACAAAAACACACACAACACGCTTCCTCCACGAAATCACTAATAATTCCCTAAAGAAAACATATAAAAAATCGGAAA	GGATCCTTCCACACTGCCAA	59.962	20	100	100	TTTGGGAGGCCATTGGAGTC	59.96	20	100	100	147	328	474	GGATCCTTCCACACTGCCAA	59.962	20	100	100	GGAGGCCATTGGAGTCGTAG	59.895	20	100	100	143	328	470	ATCCTTCCACACTGCCAACC	60.251	20	100	100	TTTGGGAGGCCATTGGAGTC	59.96	20	100
nSSR_1175	CT	6|C6222450:1618-2029|+	6|C6131289:193-204|+	6|C5137975:314-325|+	N/A	N/A	7|C6397686:833-846|-	6|C7138398:773-784|+	N/A	0.4	0.38	0.99	CCTGCACGATTTACTTGTAAAAAGTGTATCTGCAACCCCCAGAGGCCAGTACGTCGTCCGCGTGGAAGGCCTAGAACCTGCATCCCTGATGCTTATAAATGTAAGGAAGAAGTAGTACCTTCAACCATCCTACAGGCACAATTGTGGGTTGATGTGTAAAACGAAGAGTGTACAGTTGAATGTGTATGCAGAAAGGAGGG	CCTTTTTTTTATGTAAAAGACTTGGTTTTGTCCTAATCTTAAACTATGAATTCTTTTCTTCAAAGAGCAAAAAGAACAAATGAACTACTTAACTCTTCCATTTTTAATCAAATTTATGATATAAAAAATGAGGAGAGGTAATTTTCAGAAGCAATACTAGAATGAGTCATATCCTGGAGCCAACGGTTAACATGATGTCA	CAGTTGAATGTGTATGCAGAAAGG	58.604	24	100	100	GCTTCTGAAAATTACCTCTCCTCA	58.508	24	100	96.88	192	372	563	CAGTTGAATGTGTATGCAGAAAGG	58.604	24	100	100	TGCTTCTGAAAATTACCTCTCCTC	58.508	24	100	95.83	193	372	564	TGAATGTGTATGCAGAAAGGAG	56.432	22	100	100	GCTTCTGAAAATTACCTCTCCTCA	58.508	24	100
nSSR_1176	CT	6|C6222554:2117-2528|+	6|C6070406:541-552|-	6|C5341863:2571-2582|+	5|C5324766:333-342|+	6|C5985941:216-227|-	N/A	6|C6959304:279-290|+	N/A	0.37	0.25	0.99	GTTCTGAAAGCTTAACCATAACCACTGGATTAGATCAATCTCCACTGTCCATTAAGGAGGTGGAGGCCTATATAAAGGGGTGAGACCCTTTATATAGGCCTAGTCATTATAACCAAGAAAACTCCAAAGCTTATCCACTCAAAGAAGTGTAGTTCTCTCTTAGTTCAATACAAAGTTTCTTTCTACCAAGTGTCTCTTAA	CACTCTCTTGCGGAGATTATAAGGCTTGCTTAACTTGTTCAGTAAGAGGGACAAGTCCAAGCACCGCACAAGTGACAAGTAAAACCCTCGCCCCGTGACAATAAACTCACCTTTTGAGATCATTATATTACCAAACTAAGACTATATTGGTAAGAATGAATTTACATGGCCTCGGTGTATTGGGTAAATGTATTATTAAC	ACTCCAAAGCTTATCCACTCA	56.641	21	100	100	GGGGCGAGGGTTTTACTTGT	60.251	20	100	95	186	320	505	ACTCCAAAGCTTATCCACTCA	56.641	21	100	100	GTGCTTGGACTTGTCCCTCT	59.602	20	100	100	156	320	475	ACCAAGAAAACTCCAAAGCT	55.361	20	100	100	GGGGCGAGGGTTTTACTTGT	60.251	20	100
nSSR_1177	CT	6|scaffold14095:441-852|+	N/A	N/A	N/A	6|C6081741:2447-2458|-	6|C6367050:228-239|-	3|C7101234:184-189|-	8|C5598483:184-199|-	1.6	0.38	0.97	TTTATTTCCTTTCACCACTTTTGTACCTTTTCTTTTAGTTAAGTCAGTATGTCGATAAGGGTTTAGTCTTATATGCTATGGAGCTTCACCTTTTATATGCCTTCAATGATCTTCAGGATATATTGATATTCACAAATTGGCAGGAAACACAAGGAAAAGGACGAGACACACCACGACACATCATGAGCTAAGTTTCCTTC	TCATGATCTCAAATGTGGTATACTTTTTAGTGCATATATCTTGTAAAACATAGGGGTTTTATAAATTTATTTGGTGTTTATTTGCTCTTAATTATACTGTTAATTTGATTTTTAATTGGATTATTGGATTTATTTCCTTTAAATGAGTTATTAGGGATGATAATGACCAACTTGTAAATTCATTACTGTCGGGGACTTAG	Primers not available
nSSR_1178	CT	7|C5877088:82-495|+	9|C6126715:530-547|+	7|C5309366:245-258|+	8|C5385310:1293-1308|+	7|C6041835:308-321|+	N/A	8|C7141186:2257-2272|+	N/A	0.75	0.25	0.96	TAAGTGAAAGCCATTGGGAGAACAGGAGCCTTAGTCTTGTTTGTGTTTGGACTTTGGAGGAGAGAAGAGAAGCAGCTTTAGCTTTTTATATTGAGGAGCTCAATTACAAACACAGTAAAAGATAAAGATGATCCAGTGACCACCACCATGAAAATTAAACTCTATGCATTCTCTCTTTAGCTACTAACCTTAATTCATCA	GGCTCTCTCTCTGTCTCTCTCCACGTTTGATCACATGAGGTCAATCATGCGACACAATCCAAAGTCTGATCTAAAGTGTTCCAACAAACTTTGATTGCCAGATAATAAGATTCGGCAATGCAGTTAGTATGTAGTTTATATTAGAATATATGAGAGTAAAGAGTAGATTGGACGATCTTGCTTTTCTATGGTGTGGGTAT	CCAGTGACCACCACCATGAA	59.89	20	100	99	TGTGTCGCATGATTGACCTCA	59.998	21	100	100	138	213	350	ATCCAGTGACCACCACCATG	59.671	20	100	97	TGTGTCGCATGATTGACCTCA	59.998	21	100	100	140	211	350	GATCCAGTGACCACCACCAT	59.379	20	100	96	TGTGTCGCATGATTGACCTCA	59.998	21	100
nSSR_1179	CT	7|C5930653:147-560|+	7|C6224287:1482-1495|-	7|C5240361:505-518|+	8|C5295704:622-637|-	7|C6004105:560-573|-	N/A	7|C7129554:489-502|-	N/A	0.37	0.25	0.99	GACCCGGTCCTGACTCCTTCACCTAAGGCCACACCAGCATCCGATGAGCACTTACACACGAATCATTGAGATTTATTATCTGTGCATTTCTTTTATTTTATTGTCTTGTACTTTTTAGCTAGGGCCACACCCTGCGAACCCTATCTTTTATGTTTACCTTCTGTAGTGTTTTTTGCTTTGATCTCTCTTGGAGCCATGTG	TTGCAAATGAACAATGAGACACACCCTGGCATGCACTCACCTGATTAAACTAAATAGAACAAGGAATATCATCACATAACCGGGGAAGTCTCAGTTCACCTTTTCCCATGCTCATTCATTATCTTTATCTTTTTATTGTGCTTTGTTGAGTAAATTGAAGACAATGTACACCTTTAAGTGTAAGGATGAGGGTAGCTACC	CACACCCTGCGAACCCTATC	60.462	20	99	100	CATGCCAGGGTGTGTCTCAT	60.035	20	100	100	122	271	392	CACACCCTGCGAACCCTATC	60.462	20	99	100	AATCAGGTGAGTGCATGCCA	59.961	20	100	100	135	271	405	CACCCTGCGAACCCTATCTT	59.458	20	99	100	CATGCCAGGGTGTGTCTCAT	60.035	20	100
nSSR_118	AAG	5|C6018282:193-607|+	N/A	5|C5261524:659-673|-	5|C5040836:278-292|-	5|C5994817:222-236|+	5|C6299372:688-702|-	4|C7139670:926-937|+	N/A	0.37	0.25	1	GGGTTCTTTGCAATATGTGATCGAACATAAGCTAGCTATTAGTGGAAAGTTAAATTCTAATAGCGCTACTTGGTTTCATCTTGGTGGAGGTTTTTGTTTCCATTTGATCTCTCACCGACAATTGTTTTATTCACAATGGGAGATAGAAATTGGTGGTTATCTATCTAATGACAAAAATTGGGGAGTAACAGTCAATTTGA	ACCTAAACGGTAATGTTGATGGTTCTATTTTACATCATCTTGCAATATCGACTTTTGATGTTCGGCCCTTCAACTGGTGTTGTAAAATAATTCCTTAGTCCTAATTTATTGTTGCATGGAGTAACACAATATATGGTATATGCATATAGTAACCTAGATTACTTTGAGGATTGGTTAATCTCGCAATTTTTCTTCCTTTA	TCCATTTGATCTCTCACCGACA	59.168	22	100	100	GGGCCGAACATCAAAAGTCG	59.832	20	100	100	185	290	474	TCCATTTGATCTCTCACCGACA	59.168	22	100	100	AGTTGAAGGGCCGAACATCA	59.6	20	100	100	192	290	481	CCATTTGATCTCTCACCGACA	57.749	21	100	100	GGGCCGAACATCAAAAGTCG	59.832	20	100
nSSR_1180	CT	7|C6011902:320-733|+	7|C6205557:1104-1117|+	7|C5218791:371-384|-	7|C5354844:966-979|+	7|C5963217:344-357|-	9|C6393592:1687-1704|-	N/A	N/A	0.75	0.25	0.99	AGTCACTGGAGCTGCTCAGCTAGTTCTTCAGTAGCTGGCCCGAAACAGAGGAACAAAGAGCCAAAGACAGAGAAAGCAGGACTAGCCGGTGCTGCCACTGTGGTGGCCGGTGCAGATGGCTGGAGACTCGCGGCTGGAGGTTGATGGTCCGTCAAAGCTCCACTGGACGCAGCTCAAGGAACGGAGGTGGTTCTTCAAAG	CGAATGGAAGCTGACCCCGTCTCCCCTTCTAGCTAACCCACTTCTTCAGAGTCTCTAAGCGCCAGCACGATCACCACGCGTCGATTTTTCCCTCGACGATGCATGCGAGCAGCCACCTCCTGCTCCACCGGGCCCACCGGAGCACCACCTCCACTTTCTCCTTAGCTTGCAGCTGCACACGAGCCCTTCCTCCCTTTCTA	GATGGTCCGTCAAAGCTCCA	60.036	20	100	94	GCTGGCGCTTAGAGACTCTG	60.527	20	100	95	138	342	479	GATGGTCCGTCAAAGCTCCA	60.036	20	100	94	AAAATCGACGCGTGGTGATC	59.281	20	100	100	160	342	501	GGAACGGAGGTGGTTCTTCA	59.605	20	99	97	AGAAAGTGGAGGTGGTGCTC	59.602	20	100
nSSR_119	AAG	5|C6042902:192-606|+	N/A	5|C4903748:233-247|-	N/A	4|C6068839:1772-1783|+	N/A	3|scaffold34277:187-195|-	3|C5723145:401-409|+	0.89	0.38	0.98	ACAAACAAGATATCCTGACAAGAGGATCAAAACAAACATCACTGTGAAATGGAACACAGACTGATTATATTTGAAAGTACACAAACATCTAAAGATTCTAAACAACAACCAAATTCATGAATGAGGCTAATCCTTTAATTGGTATATATTATATTTCATAAGCATCACACAAACCAAATGATCAAAATTCACTATGAAAT	AAAAAACCCATAAATATGCAAGCCAGTGCATTCATGTACATGCTATGATTTCACTATGCTTCGAAATATATTTCAATTTCAATGCAACTCAACATGCATCACCAAATGTCTCAGAGCATTGAGGCAAATCTAATTCAATTTAACAAAGAAGAAAAAGGTTTCAAATTGTTCAATTTTTCGTTCCAATTTCCATCACAAAG	GCATCACACAAACCAAATGA	55.064	20	100	100	TGCCTCAATGCTCTGAGACA	59.021	20	100	100	180	352	531	AGCATCACACAAACCAAATG	55.051	20	100	100	TGCCTCAATGCTCTGAGACA	59.021	20	100	100	181	351	531	GCATCACACAAACCAAATGATC	56.826	22	100	100	TGCCTCAATGCTCTGAGACA	59.021	20	100
nSSR_1194	CT	7|C6178846:327-740|+	N/A	7|C5088131:291-304|-	8|C5353546:326-341|-	8|C6005375:271-286|+	7|scaffold14580:604-617|+	N/A	N/A	0.49	0.38	1	TTTTACCGAAGTGGCCTTAATATAAAAGGCCACTTTGGCCACTTTCCCCACCCTCCCCGAACTCCACTCTCGATCGCGATTCCTCTCCCGTGACCTAAAAAACCAAAAAGCTCAGGATTCTTCTTCCCTTGCAACCCGCTGCCCCTGGATCAGGTTTGCCAATCTTTTCTCTTCCTCGCTCTCCCTCTCCTTCTATCTCC	GAACCCCTTTCGTCTTATGAAGTTGCGATTTGGTCGATCTCTCCAACGTCTCTACTCCTCTCTGTCCCGAGAGTCGCTAGGGTTTTGGGATCGTTGGCTGCTCTACCCCTCTCTGTCTCGAGGTGAAGCTCGATTCCATCTAATTTGAAAGTAGTTTGTATATTGTTGTTAATATTATCTGTTAATTTTGCTCAATTTCT	CTCGCTCTCCCTCTCCTTCT	60.107	20	98.75	100	ACGATCCCAAAACCCTAGCG	60.108	20	100	100	134	374	507	CTCTTCCTCGCTCTCCCTCT	60.107	20	100	100	ACGATCCCAAAACCCTAGCG	60.108	20	100	100	140	368	507	TCTTCCTCGCTCTCCCTCTC	60.107	20	100	98.75	ACGATCCCAAAACCCTAGCG	60.108	20	100
nSSR_1195	CT	7|C6180152:575-988|+	7|C5764157:198-211|+	7|C5250973:779-792|-	7|C5319498:221-234|-	7|C5912303:559-572|+	8|C6371442:293-308|+	N/A	N/A	0.37	0.25	0.99	TTGCAGTCCAAACCCAAAGTCTCAACCACATAGTTATTCTCCAGGCCTTTTTCTAAAACCAGTACTCACCCTACAGACTCCATTCACCATCATCTTCCTTAACCCCCTCTCTCCACACACTAGCCATTCCCAGATAGATAACAGAACTCATGCAACTTCCCATATTCCATTGCCCTATCAATAGGAAACCATACGTAAAC	ATATTACTGATGCATGCTACCCGGTTAATTACATGTTGGCGTATGCCCCTGTAGAGGAGGTTAGGTGTTTCGGACTTACCGTTCGTAGCCGAGTGGCACTCCGGCGGCGGCGTTCGAGTACCTCTGGCGTCTGGCGGCACAGAGGATCAGATCTGAATACTAGCCGAGGGTCAGTGAGGAAGTGAGTGTGGGAAAGAAGG	CCACACACTAGCCATTCCCA	59.672	20	100	100	AACCTCCTCTACAGGGGCAT	59.955	20	98	100	164	312	475	TCCACACACTAGCCATTCCC	59.382	20	100	100	AACCTCCTCTACAGGGGCAT	59.955	20	98	100	165	311	475	CCACACACTAGCCATTCCCA	59.672	20	100	100	CCGGGTAGCATGCATCAGTA	59.607	20	100
nSSR_1196	CT	7|C6198886:352-765|+	7|C6136237:660-673|-	7|C5117645:250-263|+	N/A	7|C5637943:244-257|-	10|C6367264:965-984|-	N/A	N/A	1.2	0.38	0.99	GCAGGGGAAATGTCCACGTGACTTGTTATGAAGAAGGCCACGTAGCTCAACAAGACAGTCTAAGTAAGTAGCATATATGCTCCTCGCCTGCGTTTCAGAAGATTAAGATATCCAAGCAATGGGGATGAAGATGAGGAAGTACCTATCCTCCATCGCTGATAACCTTCTCCAAAGATGTTCACAGTATATCGATCATTCAA	GTCTAGATTCATGTTCAGTAATATCTCAAGTAATTCTTTTGAGCTTTTTAATGGAGATAATCACCAAATTAACTCTCAGGATTCTGGGCACAACATTGGAGGATCTAGTGGAGGAGTTTGACAGAGGATTGGAGCCACAGACAGGAGGGGAATACTACTCAAAGAAATTAGTGGAGTTTTGCAGCTTAAAAGCAATTGAG	TCCTCCATCGCTGATAACCT	57.912	20	100	100	CCTCCAATGTTGTGCCCAGA	60.251	20	100	100	171	345	515	CCATCGCTGATAACCTTCTCCA	59.897	22	100	100	CCTCCAATGTTGTGCCCAGA	60.251	20	100	100	167	349	515	AGTACCTATCCTCCATCGCTGA	59.892	22	100	100	CCTCCAATGTTGTGCCCAGA	60.251	20	100
nSSR_1199	CT	7|C6213504:344-757|+	5|C5849189:260-269|+	7|C5213941:318-331|+	N/A	7|C6057369:277-290|+	6|C6262538:541-552|-	5|C6667015:238-247|-	N/A	0.9	0.25	0.98	AATGTTTCATAATGAACATAGGTTGGAGAAATCGGGTCGAACCATATGATTTATCGGATCCGGATGGATTGCGAATCTTGTGATTGCGAACATAAAGATCCATCCGCCCATTATCGGATCCGGGTAGCTTGTGGAAGACGGATCCGCATATTATCGGATCGGGTCTAGCAACACTGCAGGGCTCCGCTCGTTTTCTCTTC	CGCCCTACCCCGATGGCGGAGCCTGTGGCGGTTTCATGGACGGAATCATAGTGAATCCCTGATTTCTCTCTCCATCTCACCCTATATGAATGCTTCCTATTGCTTCTATTTGGAATTTAATCGTGAGTTTCATGCTCTTTTTGAAGAATTTGGTGAGGTTTAGATCCGGATATGCAAGCACTGGGATGGAAAAGAGGAGT	AGCTTGTGGAAGACGGATCC	59.749	20	100	84	TCCATGAAACCGCCACAGG	60.303	19	100	100	129	325	453	ATCCATCCGCCCATTATCGG	59.747	20	99	98	TCCATGAAACCGCCACAGG	60.303	19	100	100	157	297	453	GTGGAAGACGGATCCGCATA	59.612	20	100	100	TCCATGAAACCGCCACAGG	60.303	19	100
nSSR_12	AAAC	6|C6214282:1612-2035|+	8|C6192411:542-573|+	N/A	N/A	6|C6087415:2108-2131|-	N/A	3|C7140522:883-894|-	4|C5609039:465-480|+	1.74	0.38	0.99	ACTTTCCTTCCAATTGGGATTCCATCCATGTTAATTTTCACAAACAAGCCCTTCTTGATGTTCTCAATCTTGTTTATGTTTTCAGAGCCATTGTTTTGTTGTTCCACAGATGGTTTTGAGGTGCTAGCAAGGTTCTTTCGGAATGAACGAATAGGTGGCCAGCCTACCAGTGGAACATTACTAGTTCTGCAATTCCAACT	AAGATCTTAAATTAAAAACACTCAAATCATGCTTTCATCTTTCTTTGAACAGCTGAAACTAATTAGAACACTAAACAGAGGAAAAGATTAAAGCAGAATAATCACAGTCACTACCTAGTTTCAGAGCTGTTTGCATTCCTCTCAAGTCTCTGCTGCTGCTTTTCCTTCCCATTAGCTAATCCTGGAAAAACAAAAAAAAA	CCAGCCTACCAGTGGAACAT	59.379	20	100	100	GCAAACAGCTCTGAAACTAGGT	58.858	22	100	100	200	358	557	CCAGCCTACCAGTGGAACATT	59.995	21	100	100	GCAAACAGCTCTGAAACTAGGT	58.858	22	100	100	200	358	557	CCAGCCTACCAGTGGAACAT	59.379	20	100	100	GCAAACAGCTCTGAAACTAGG	57.179	21	100
nSSR_120	AAG	5|C6066994:398-812|+	4|C6130603:197-208|-	N/A	4|C5333396:619-630|+	N/A	4|C6326652:223-234|-	5|C7135156:1080-1094|+	5|C5746511:1146-1160|+	0.5	0.25	0.99	ACAAAGAAACATAGAAAGGATTGAAAGAAGCAGAGCATGATGAGAGGAAGATACCAGCAGTCCCGCTCTGTGCATTCCAGGTCTGGCTCTCAGTTGCCTGCTGCTTCTTTGATGACTCAAACAAGTCCGAAGTCTGTGGCTCTTTTCCAACTCTTGCCACACCCTACCATCATCCATCACACAGAGACATTCATTAACCC	CATGCTTCCACAATGGCAAAATCCAAATAACAATATCAAAACAATCAGAGAACAAACCCCAATTCCACCGAGACAAACACGATCACACAACAAAACCCAATTCAAAACCCCAAATAAAAAGATCACGACCTCCGATCCCGAAATCAAGAACTCGATCGGCAGATCAAGGTAGGATCTAATCTCATCAACACGGACATGCA	CAAGTCCGAAGTCTGTGGCT	59.966	20	100	100	GTCTCGGTGGAATTGGGGTT	59.962	20	100	100	168	321	488	TCAGTTGCCTGCTGCTTCTT	60.179	20	100	100	GTCTCGGTGGAATTGGGGTT	59.962	20	100	100	200	289	488	GCCACACCCTACCATCATCC	60.179	20	100	100	GTCTCGGTGGAATTGGGGTT	59.962	20	100
nSSR_1200	CT	7|C6214092:2020-2433|+	7|C6239775:386-399|-	7|C5162369:279-292|-	N/A	7|C6057537:294-307|-	8|C6355920:390-405|-	7|C7114540:1193-1206|+	7|C5572789:297-310|+	0.35	0.12	1	TTTCAGTGCTGATTATATTTGTTGCATGCCTTCACAGATTGAAAATGATGCTGTCATCGCATTAACATTGAGGAAAGGTTTGCTTCCTGCTCTTTCATCCACAAACCTTCAACTTCGTTAGAGAAACTATCGGACATTTCTGCACTTTCTTCTAGCAATATTCCAACCTCTCAGCTTCAATTTTGTGAAAAAAACTTGTG	TCTATTTTCAGATGATGGCGAATTTGAGGAAGTTTATATTGCCCGACCCGAAGATTTCACTTCATACTCATAAGGCGAATGTCTCAATATAGCTAGAAGATCAGACATTGTTGTGATATTCTCATTTAAAATGTGATGAGGCCTGAAATTATGTTTGAACAATGAGCAGGTTTTTAGTTTGGTGTGAACAAGATTGAGAA	GGAAAGGTTTGCTTCCTGCTC	59.729	21	100	100	AAATCTTCGGGTCGGGCAAT	60.034	20	100	100	200	271	470	GGAAAGGTTTGCTTCCTGCT	58.668	20	100	100	AAATCTTCGGGTCGGGCAAT	60.034	20	100	100	200	271	470	TGCTTCCTGCTCTTTCATCCA	59.648	21	100	100	AAATCTTCGGGTCGGGCAAT	60.034	20	100
nSSR_1201	CT	7|C6215456:1448-1861|+	N/A	9|C5008595:301-318|-	N/A	7|C6023541:320-333|-	N/A	7|C6912390:281-294|+	6|C5698673:317-328|+	0.98	0.38	1	TTGGCTCCCGGGTACCAAAGAGGACGGTCGGAGGTGAACTTTGATGGCTTCTTTGCTGCTTTCTTTTTACCGAAGCCGAACCGAGCTTGAAAGCGAGAAGCCGGCTGGTGAGTCTCCGGAAGCCTGGTGCCTAAGAAGGTGCAGGTAGCTGCAGCTGCAGTGGTGGCTGCCATTGATGCACACTCTAACTCTCACTCTGA	TCTTATTTGAAGAGTATCCGAGAAGAACACAGAGAAGGAGAAGAATGATAGATGAAAAGGAAGTAGGGTTTGAGATATAGAGAGGAGTGGGAGAGGACGGCCTTATCTTAGCCTTATCTTGAGAGTTAGCCAGGTAGAGCTTGAAGGTGATTTCCATGACCATGTGGTGGGATGTTATTGGTCCAATGGAGGAGAGGGTT	TGGTGCCTAAGAAGGTGCAG	59.963	20	100	100	GTCCTCTCCCACTCCTCTCT	59.371	20	100	100	188	324	511	CTGGTGCCTAAGAAGGTGCA	59.963	20	100	100	GTCCTCTCCCACTCCTCTCT	59.371	20	100	100	189	323	511	GTGCCTAAGAAGGTGCAGGT	59.963	20	100	100	GTCCTCTCCCACTCCTCTCT	59.371	20	100
nSSR_1203	CT	8|C5923447:7-422|+	N/A	8|C5233065:710-725|+	8|C5353924:187-202|-	5|C6087081:3013-3022|-	N/A	5|C7093788:223-232|+	5|C5757143:923-932|+	1.5	0.25	0.99	GAGTTGAAATGATTGAGTAGAAAAGTATGTTGCCCCTGTCTTTCTGGAAATCTATAGAATTAGAATGGTTGGAGAAGGAACCAAACGTGACAACCAAACGGAAAGATTGCATTGATGGCTTCCTTGGCTCAATGGAAAAGGATGGATCCAATACTTTTGCAAATTGGGTGAAAACAAATCAAATCAATGTTGTAAGTATA	TCAGTGATGGATCTAAAGTTAAATGGAATAAAAATTGAAAACTTTGATGGATTAAGATGTGTAGTTTTGTTTGATCTCTGTTTTATTTTTGTAGCACCTCCATTCTGATGAAAAATTGTTTCATGTAGGTCTTGGTGTTAGGGATATGCACAGATGTCTGTGTGCTAGACTTTGTCTGTTCCACACTGTCTGCCCGAAAC	TGGCTCAATGGAAAAGGATGGA	59.957	22	100	100	TCAGAATGGAGGTGCTACAA	56.159	20	100	100	200	130	329	TGGCTCAATGGAAAAGGATGGA	59.957	22	100	100	TCAGAATGGAGGTGCTACAAA	56.932	21	100	100	200	130	329	TGGCTCAATGGAAAAGGATGG	58.54	21	100	100	TCAGAATGGAGGTGCTACAA	56.159	20	100
nSSR_1204	CT	8|C5989014:171-586|+	11|C6069294:330-351|-	7|C5293534:834-847|-	7|C5307584:545-558|-	N/A	9|C5996792:284-301|+	N/A	N/A	1.5	0.38	0.98	TCCAAATTTATTTAGCTATATATACATATATATAAAATATAAATTAAAGTCTGAATAAGGGTATTTAGGTAAAATGAAGAGAGTGGAGGCAGAGGGAAGGGATATATAGTGGGGAAATAACTGGCACATTTGACCAAGAAGACTAACATCATTTGTTGCATTTTGTGGCAGGTCTGTTGCATCCTCAGACCCAGCACCAC	TCTGTGGCTGGCCCCCTCCTCATACTCCCAACATCATATACACAACTACCCCACCTCCCTCCTCTTTCCCATTCCATTCTCCATTTCTCATTCATTCTCTCTCACATTCAATCATTCATTAAATAATTCCATCATTCACCAACATATTATTTATCTCAACCAAATTTCTATGTATTATTTTTAATAAAAAGATAAACTAG	GGAGGCAGAGGGAAGGGATA	60.105	20	100	100	GAGGGAGGTGGGGTAGTTGT	60.547	20	100	100	193	254	446	GCAGGTCTGTTGCATCCTCA	60.322	20	100	100	ATGGGAAAGAGGAGGGAGGT	59.576	20	100	98.75	121	337	457	CTGTTGCATCCTCAGACCCA	59.674	20	100	100	ATGGGAAAGAGGAGGGAGGT	59.576	20	100
nSSR_1207	CT	8|C6060222:440-855|+	7|C5943154:297-310|+	6|C5209189:448-459|-	N/A	7|C5893675:594-607|+	7|C6346432:271-284|+	N/A	N/A	0.63	0.38	0.99	CAGTTTGAAGCTCCACTACTCCGGAGACGTCCTGCCACTCCAGCATCTCAATCTCTTCTCCTTTTTCTTTCTACTTTCAATTGAGCCTCAAACCTTGTAATCAAGAAGATTGGATAGTGGATTCATCTTCCTCGATGGAGAATCGTGGTTTTCACCCCTCGATTTGAAGGGTTTCCACGTTAGATCTGGTTTCTTGCTCC	TCTCCGAGTCTTCAACTTTCAATCCATCTTGATCTCTCTCAAGCTCTCTCCCAAATCATCTACAAATTCAATTGTTTATCGAGATCCCGGCTCTCTCCGATTTTCGAGTTAACACAATACAACAATAGCAAATTTTCAAGTGACAAAATAGGAGTATTAGGTAAGAAATAAACAAGTGGGTTCTAAATTCCAATAAGAGG	CGTGGTTTTCACCCCTCGAT	60.321	20	100	100	GAGCCGGGATCTCGATAAACA	59.66	21	100	100	166	343	508	CGTGGTTTTCACCCCTCGAT	60.321	20	100	100	AGCCGGGATCTCGATAAACA	58.59	20	100	100	165	343	507	CGTGGTTTTCACCCCTCGAT	60.321	20	100	100	GAGAGCCGGGATCTCGATAA	58.464	20	100
nSSR_121	AAG	5|C6089330:403-817|+	N/A	5|C5104557:371-385|+	5|C5384812:398-412|-	N/A	4|C6170676:403-414|-	5|C7141344:2798-2812|-	4|C5658815:315-326|+	0.47	0.25	0.99	AATGATGAATGATGTTGTTGTGTGGGGTAGTGATCCAAATGACAGTGATTACCAACTAGTAAATGGAGATGATGCAAGCTCATATGAAGTGGAAAGTGATTGTACTGAGCCTAGTGAGTTGAATAATGATCTAGAAGGCTCTGATGATGACATATTTGCCAACACAGCTGATTATAGAGGACTTAATACCAATGAAGTAA	AACAAACAAATGAAGATGCTAGAGAAGAAGACAAGTTCAATCCCAATGATCTTACAACACAGGATATGTGTGAATTTAATGAAACTGTACATAATGTAGATGAACTTCATCCTGCGTAGGATTTTGATGGCGAACAAGAAGTAGGTGTTGATTTTAATGAAGAGACACAAATGAAAGATCCTCCTTTAATTTGTGTGTTG	TGACATATTTGCCAACACAGCTG	60.057	23	99.14	99.13	CGCCATCAAAATCCTACGCA	58.986	20	99	100	200	347	546	ACATATTTGCCAACACAGCTGA	58.844	22	99.1	98.18	CGCCATCAAAATCCTACGCA	58.986	20	99	100	198	349	546	TGACATATTTGCCAACACAGCT	58.844	22	99.1	100	CGCCATCAAAATCCTACGCA	58.986	20	99
nSSR_1215	CT	8|C6126525:23-438|+	8|C6229217:336-351|+	6|C5106479:288-299|-	8|C5224236:198-213|+	6|C6054859:1120-1131|-	6|C6276960:271-282|+	N/A	N/A	1	0.25	0.98	TATCATACTTGGTGATCAAATGCCTACAAACAAAAGTTCTCCAAAATGGATGGTAACAAATCAAATGTTGTCAGAAAACTAGGATTGGAGTTTCTAAATCATTTGAATATGGCATATGTTTTAGTGTCTATAGATAGAATGATAAGGTACTCTAAGATACATGTATTTCTTTTGCGCTTGTATCAATAGGCAAATCTATG	AGTTTATTGCTGACTTCTCTATTGCAAACAATGTTTACATTCTCATTCCTCTTATCATTTGATTTCCAGCTCTCCATGTACAGTAGCGATAGGAACAGGGGACTGGCATTCATCACAATGGCTTCCGAAGAAGATGCTCTTGCGGCACTAAATGGTCTCAATTCATATGTTAGTACTTCAATGCCTGATTCTTTTTCCCA	TGCGCTTGTATCAATAGGCA	57.676	20	100	92	AGTCCCCTGTTCCTATCGCT	60.032	20	100	100	148	194	341	TGCGCTTGTATCAATAGGCA	57.676	20	100	92	TGAATGCCAGTCCCCTGTTC	59.962	20	100	100	156	194	349	TGCGCTTGTATCAATAGGCA	57.676	20	100	92	CCATTTAGTGCCGCAAGAGC	59.901	20	97
nSSR_1216	CT	8|C6142811:47-462|+	9|C6000472:247-264|+	3|C5257072:500-505|-	8|C5362090:672-687|-	8|C5986847:181-196|-	8|C6280158:469-484|+	N/A	N/A	1.97	0.25	0.98	CTCATCAGTTCATACTTCTTTGGACCAAGCCTTGATCACACCCCATACCATCACCATAAGAGAATCTCATAATCAACTCTACAGGGACCAACTCATGGAGACTAAGCACAACGCCTGGACTTACCCCTCACTTGTTCCCTCTTACTCTATCCTTCAACACCGGGTGCACAACTTACCCGAGCTTTACCCATGCATGCAGC	GATCCCTCTCACAAACTTAAAGGAATCAAGGAAACTCATAGAGAATCCCTATAGTATCCACCAACTTCCACCCAACCATCAACAAGACTCAACCTCCAAACCATGCATTCCCATCATCCTATCCTCTAGACAAGTGCATTAGCACCAACCCTCATACAACCATCAGCCCTCTTCTTCAGTTTCCCCGCATGGCTCCAAGT	CGAGCTTTACCCATGCATGC	59.97	20	99	96	GTTGGGTGGAAGTTGGTGGA	60.106	20	100	100	115	223	337	ACCCCTCACTTGTTCCCTCT	60.104	20	100	100	GTTGGGTGGAAGTTGGTGGA	60.106	20	100	100	170	168	337	AACACCGGGTGCACAACTTA	60.107	20	100	100	GTTGGGTGGAAGTTGGTGGA	60.106	20	100
nSSR_1219	CT	8|C6176102:1128-1543|+	N/A	8|C5267762:369-384|-	7|C5247998:288-301|-	N/A	8|C6047408:203-218|+	N/A	8|C5613097:545-560|-	0.4	0.38	1	AGAATGGGGAAGATGAGTACTGTGGGAATTGAATGCATGTGACAGTGATGACAGGCATAATTTAACTGTGGCACTTGATGAACAGACATGTCCTCCTTTTGACATCAAAATTATTAATGGATGATGACTCCCATCATTCATTCATTCACTTTGTTTTCCATCCCCATGACTGATGACCCTACTGACAACTCCTTCCCTTC	CCCACACTCTTTCTCTTTCTATCTCTCACTTCAACCAATGTCATCTCTCTCCTGTCATTGATAGTCTTTGAGACCACCCTACACCTACACAACCTCTCCCTCTAGGGGATATATGTGCACAAGTATTGAGGTATTGACACATTCTTCTTAATTAATGACAAGACTTTATTTTTTTATGTTTTTTATACAGTGTGTCCTTG	TCCCCATGACTGATGACCCT	59.955	20	100	100	AGGGAGAGGTTGTGTAGGTGT	60.133	21	100	100	157	360	516	TCCCCATGACTGATGACCCT	59.955	20	100	100	TGTGTAGGTGTAGGGTGGTCT	59.852	21	100	100	147	360	506	TCCCCATGACTGATGACCCT	59.955	20	100	100	GGGAGAGGTTGTGTAGGTGT	58.651	20	100
nSSR_122	AAG	5|C6178906:17-431|+	5|C5934300:208-222|+	N/A	5|C5242046:553-567|+	5|C5719137:308-322|-	N/A	7|C7051272:414-434|+	N/A	0.8	0.38	0.99	AAAGGAAAAAACTCGCCTATTTATTTCAAAGTTTTACTTACAAAGTTAGATCAAGAGAAAGAGAAAGAGAAAGACTTCGGATTACAGGCATGCATTCTCCAGGAGCAGCAGCACAGAAAACTGTATTTGGTTTCATCTGGTTACTGGAATCCCCCGGCCAATTAGGGCGAGATCACTTCTCAGTAATTCAAACAAGATCA	AACAATGAAGAGTCAATAAGATTCAGGTCCATCAAGTGGATAGCAAGTGTCTTCACCCCCAGTATTCCATAAGAAATGAGCGTAATTAGATGCATAGACTGCGTTCCCAGGATCAGCAGCAATGGCTTCTAAATAAGTCTCCTCAGCACCGTTGAGATCCTTGCGCACTAGCCACAAGAAACTCGCATACTTATCATAAG	GCCAATTAGGGCGAGATCACT	60.203	21	100	100	CATTGCTGCTGATCCTGGGA	60.107	20	100	100	183	172	354	GCCAATTAGGGCGAGATCAC	58.77	20	100	100	CATTGCTGCTGATCCTGGGA	60.107	20	100	100	183	172	354	GCCAATTAGGGCGAGATCACT	60.203	21	100	100	TTGCTGCTGATCCTGGGAAC	60.323	20	100
nSSR_1220	CT	8|C6190758:337-752|+	N/A	N/A	N/A	7|C5672553:222-235|-	6|C6079792:262-273|+	4|C7116306:550-557|+	4|C5629179:298-305|-	1.6	0.38	0.98	ACATGTATTTAACAACGAAGGCGTAGAAACAAGAGAATCATGGCAGGAGTTCATGCTCTCCCCTTCCACCCCCAGAAGTAGGACCATGGAAGCCCTGCAAGCTTTGGTTTCTTGTGCCCAAACCAATGAAGGGTCACAAGAATTATCCAGAATATATAACATCTTATGCGTGTTTCTTTTCTATGCACTCAAACCCCCTG	GAGCGCACACGCATACACACAACATACATCATCAGTTTTGTACACAGTGCAGCAGAGGCCTCAAGTGCATGAGTCCTTTTGCTGCTATGCATGGACTTATTGCAAGGTGGGGGTTAGAATTCTGAGTGATCTCTGCCGGACGTCTTTGGTTAAAGGGATTTCGAATTCTGGGATGCCAAAATTTACAAATCTCCGTTGAA	TGCCCAAACCAATGAAGGGT	60.105	20	100	100	CCTCTGCTGCACTGTGTACA	59.966	20	100	100	160	314	473	TGCCCAAACCAATGAAGGGT	60.105	20	100	100	TCATGCACTTGAGGCCTCTG	60.036	20	100	100	174	314	487	GTGCCCAAACCAATGAAGGG	59.679	20	100	100	CCTCTGCTGCACTGTGTACA	59.966	20	100
nSSR_1221	CT	8|C6208764:1274-1689|+	N/A	8|C5338983:2345-2360|-	8|C5308298:416-431|-	8|C5982507:855-870|-	9|C6104630:326-343|+	10|C6978046:387-406|-	N/A	0.76	0.25	1	AATTTTATTTTTTGTGAAAAAGATGGAAATTATCCACTCTTCTTCTTCTCTTCAGTGTGGGAGAAAACCCTAGATTGAAGCGGAGCAATGGAGGAAGGACGACGGATCGAATCGCTTCGTGATGTCGATGGAGGTATCTCAGTCATTGAGTCTTCGTTCTCGAGGATCGTTGCGCTCGAACGCCCAAGGTATGCCATGCC	CCGCGTTATAGGGTTTCTCGATTCGTTGTGTGTAGTTTATTGGATTTGTGTTTTGGAAGGGATCCTGAGAGTGAGGAGATTAGGGTTTCGAAAAAGTCGATCGAGGAAGACGAAGACGATGGTATGGGTTTTGGTTTTACCACTGAATTTGTCTCTTGGTATTAGGTTTAGGGTTTCTTATGAGGATAGTGGACAGATTG	CGCTTCGTGATGTCGATGGA	60.525	20	100	100	TCTCCTCACTCTCAGGATCCC	59.783	21	100	100	183	312	494	TCGCTTCGTGATGTCGATGG	60.525	20	100	100	TCTCCTCACTCTCAGGATCCC	59.783	21	100	100	184	311	494	CGCTTCGTGATGTCGATGGA	60.525	20	100	100	CTCCTCACTCTCAGGATCCCT	59.782	21	99.04
nSSR_1222	CT	8|C6213972:1232-1647|+	12|C6162835:542-565|-	5|C5263814:420-429|+	7|C5361962:367-380|-	9|C6028793:969-986|+	N/A	N/A	N/A	2.32	0.38	0.97	AGAAGCTTCATGGTGCAGGGAATCAAGCCAAGGTAAACAACAGGGATATATGATGGAGAAGAGAAGGTGAGGGGATGAAGGGGATATAAATGCACAGGCACTTGAGAAGAAGAGGGGGTCACATGTGAGAGAATCCCAAAGCTAAAACGGTTGTCTAGAACTTGAGCTTTCTTAATATGTGGGTCCCTCTCTCCACTCAA	CATCTCTATAATTATGTTTTTGCCTACAGTCTACAGACATTCATTCATTCATTCACTCATAATTAAAACATTAAGTTAATTAGGAATTGAGAACTAAGTAATAGAATACAAACTTAGCTAATTAGCTCTTTCTAGTGTTTTCCTAAGATTAGTCTTAAGAAGAAGAAGGGGAGTGGTGGACGTGGAGGTGGAAACCACTT	GAAGGTGAGGGGATGAAGGG	59.451	20	100	100	TGAATGTCTGTAGACTGTAGGCA	58.914	23	96.75	100	197	262	458	GGTGAGGGGATGAAGGGGAT	60.699	20	100	100	TGAATGTCTGTAGACTGTAGGCA	58.914	23	96.75	100	194	265	458	GAAGGTGAGGGGATGAAGGG	59.451	20	100	100	TGTCTGTAGACTGTAGGCAA	55.526	20	98.75
nSSR_1224	CT	8|C6222326:3464-3879|+	9|C6131331:569-586|+	N/A	N/A	11|C6000123:569-590|-	N/A	5|C6753757:219-228|+	5|scaffold9904:542-551|-	2.33	0.38	0.97	AAATTAATTAAAAAAAGACATTCTTTGGTTGTCGGTTGGGTAGGAGAGGATAAACAGATAAGAATTTAACAAGTATTGGATAAATATTAACTTAATTCGGAATTAAATCAATTTATCGAGTCCAAATAACCCAACTCGGACCCAATGTTCCCACCCAACCAATTAACCAACCTTCCAATTTGAGTCTATAGACCTTAGAA	ACTAGTCTTCTCAGAAGTCGAATTGACTCCCAGTGACAAGAGCCGAGAAGCGGTACGGAAATTACCATTCTACCCTTCTCCTTCTCTTCCAGACCTCCTCAACCTCTCTCATGGCCTCCGCCTCCGCTCCCGCTCCCGCTCCACTCCCCCCTGATCTCTCTCTCCTCGACTCCAGCCCCTTGGCGGCGATCTCTGATCCA	AACTCGGACCCAATGTTCCC	59.962	20	100	100	GGCTCTTGTCACTGGGAGTC	60.037	20	96.25	100	128	332	459	AACTCGGACCCAATGTTCCC	59.962	20	100	100	GCTTCTCGGCTCTTGTCACT	60.038	20	100	95	135	332	466	GACCCAATGTTCCCACCCAA	60.179	20	100	90	GGCTCTTGTCACTGGGAGTC	60.037	20	96.25
nSSR_123	AAG	5|C6186558:501-915|+	5|C6125153:322-336|+	N/A	5|C5364422:725-739|+	5|C6017917:505-519|+	5|C6363182:961-975|+	4|C6782757:187-198|-	N/A	0.37	0.25	0.99	AGAATAGGTTGAAATGCCAACTTCTTCAACTCCTGCAAGTGTAGTTCTAACTTTTATAATTGGCTAAATTAAGTACCAGGTTGCTTTGCTAAGAGGTTCTATTCTCTCGGGATGAACCCGGGATCGAGCCCCCCTCTTGCAAATGCGGGAACTCAGACGCCTGGGCCCCATCCTTGGCGCTTGTCGCCTTAGTCACAAAA	AATGTGAAATACCTCTGTTCATTCTCCAAGCAAAGAGACTCCATTGATCACCTCTGGTCACAAAAGCAGAGATAGCAATGAGAAGGATCATCAAGAAGGCAAATGGGGCAACATCAAACTCAAAGCAAACACAAGCTGAACAGCATCTCTTCTTCCTCTTTTTCTTCTCTGTTTGATGATCACTTGAAGCATGTGAACCA	CCTCTTGCAAATGCGGGAAC	60.109	20	100	100	TGCCCCATTTGCCTTCTTGA	60.179	20	100	100	193	332	524	GCAAATGCGGGAACTCAGAC	59.831	20	100	100	TGCCCCATTTGCCTTCTTGA	60.179	20	100	100	187	338	524	TGCAAATGCGGGAACTCAGA	60.251	20	100	100	TGCCCCATTTGCCTTCTTGA	60.179	20	100
nSSR_1232	CT	9|C6187466:204-621|+	12|C6005776:235-258|-	10|C5254130:280-299|+	N/A	12|C5862842:526-549|-	5|C5967264:212-221|-	N/A	N/A	2.58	0.38	0.97	ACCCTGTTTCTCGGACTCTCCCACACTCTTCCAGACCTTTGAGAGGGAGGATTCCCTTTGGGAAGCCGAGCTCCGCTAAGAGTTCCATGCAGTGGCGGTGGCACGCGTCTGCGCCGTGAACTATCTCGGCACCTTGATGCTCTTTGTTGGCGTTGCCTCCCACTAATGTGCTCATGGTTGTAGAGTTTCTTTATCTCTCC	TGTGAATGTTGCAGGGTTGAGAGAATGAATGGCAACGGAGTGGGGGAGGAATTAAAGGGTAAGAAGGTTTAAGGAGAAGGTTTGGAAGGGGTTTGGTATAAGGTTGTTGGGCTAACATATGAAGTGCATGTTTTCTTCATGGAAAGATCATTCTCAGAAGGAAAGGGTTGTGTGGTTTTTGGTTCTTAATTATTCTACCG	TCGGCACCTTGATGCTCTTT	59.963	20	100	100	ACCAAACCCCTTCCAAACCT	59.36	20	100	100	190	325	514	TCGGCACCTTGATGCTCTTT	59.963	20	100	100	CCCACTCCGTTGCCATTCAT	60.681	20	100	98.75	137	325	461	TCTGCGCCGTGAACTATCTC	59.899	20	100	100	CCCACTCCGTTGCCATTCAT	60.681	20	100
nSSR_1233	CT	9|C6200656:1079-1496|+	N/A	9|C5325452:1279-1296|+	13|C5390346:1257-1282|+	13|C5938935:384-409|+	N/A	13|C6962836:447-472|-	N/A	1.96	0.38	0.96	CCATCCAAACCCCAACCACATCGATCTACATCAAACCAACACCATTCAAGCTCGAAAAAACAGCAAGAAAACAAAAATATCAACAACACAATGAAGACAAAGAGAAAATACAGCGATAAGAACACCTTAGGGTATCATCAAAGCTTAGAACTCTTCGAGATCTTCCCGCTTAGAGAGATCTGAAGGTCTCCTCTCTCCTC	GTGTCTCTCTTTCTCAGTCGAAGAGAAGACATGGGTTTGCGATAACTTGCACCTCAGGAACATCAAAACATTGAACATTATATGAAGCCAATACATCACATGGATTTTAACACCGTCCAATAGTAGCCCGCCATGTATGTGGTTTACATTAGTTAAACTTCTTCAAAAACCTCATTCTCGCCTTCCATATTTATAGTTCA	CTCTTCGAGATCTTCCCGCTT	59.593	21	100	100	GGGCTACTATTGGACGGTGT	59.171	20	100	85	197	350	546	TCGAGATCTTCCCGCTTAGAGA	60.159	22	100	97.73	ACATGGCGGGCTACTATTGG	59.891	20	96.25	100	200	354	553	TCTTCGAGATCTTCCCGCTT	58.525	20	100	100	GGGCTACTATTGGACGGTGT	59.171	20	100
nSSR_1234	CT	9|C6212564:235-652|+	8|C5832053:203-218|-	10|C5122951:199-218|-	9|C5378226:718-735|+	N/A	N/A	6|C6842476:329-340|-	N/A	1.36	0.38	0.98	CTCATTGAAGACATAGGTAATGTGATTTCATTAACAGCGAACAAACCTCTTGGCAGATCATATGAGAAATAAACAATAGCCCCGGGAACAAAGCCAGATGAGTAGAAATCCTTTGACAAATCTTTGATTCTCTCCTTTGGAGGCGTCGTATCTGAATTAAAAAACATTGAAGGATAACTTATTTAATTCTACATATAGGG	AAACAATCTTATTGTACATCCAGTTGTGTAAATTCATTTTACGTACATAAATAGAATGGCAGGTTCGGTTGTGCTAAAACTTTCACAAGAAGATATACCAAATCTTGAATTTTCTCAGATGGGTGAAATTTTGCCTCAAGAATGTAGTTATCTGGGAACCGGACTCTGATTACAGCCTGAAAAAAATTGAAAAAATGGCA	TCCTTTGGAGGCGTCGTATC	59.541	20	100	100	ACAACCGAACCTGCCATTCT	59.89	20	100	100	158	332	489	CCTTTGGAGGCGTCGTATCT	59.54	20	100	100	ACAACCGAACCTGCCATTCT	59.89	20	100	100	157	333	489	CTCCTTTGGAGGCGTCGTAT	59.54	20	100	100	ACAACCGAACCTGCCATTCT	59.89	20	100
nSSR_1237	CTA	5|C6145815:355-769|+	5|C6188133:677-691|-	N/A	5|C5362388:1107-1121|-	N/A	6|C6324192:501-518|-	5|C7125310:682-696|+	N/A	0.4	0.38	1	ATGAAGATGGAGATGAAGTAGTCCTTGTTGTTGGCCCATTGAGTTGAGGCTTATGATCAGAAGGACATGTTTGAAAGGACACACGCTTAGAGACTGAACGGCCACCTTCTCCTGGCTTTCTCTCACTGTTACCATCTCTCAAACACTTTCTCACACCCCCACTGCCATTGCTGTTTGTGCTGTTGCTCCTGCTGGTCATG	CGACTGCAGTTAGTTGATGAGTGAAGGCTTGATTCTCTTGATACTATTGGACCTTGAAAAGTTTGTGGTATAAGCTGGCCATTAGAGAACAAGACGTCAGCCGGAGACGGCGATGAAGGATTTATCTGGCTGAACTCGAAGCTCAACTCCGTGGAACACTGCCGTCTATCCCGGTCCTTGTTCTCTACTCTAGTGGTCAA	CTGCCATTGCTGTTTGTGCT	59.967	20	100	100	CGGCTGACGTCTTGTTCTCT	60.039	20	98.75	100	157	361	517	CTGCCATTGCTGTTTGTGCT	59.967	20	100	100	AATCCTTCATCGCCGTCTCC	59.895	20	98.75	100	176	361	536	TGCTGTTTGTGCTGTTGCTC	59.899	20	100	100	CGGCTGACGTCTTGTTCTCT	60.039	20	98.75
nSSR_1238	CTA	6|C6129935:164-581|+	N/A	N/A	4|C5157895:300-311|+	N/A	4|C6328842:618-629|-	4|C7129460:420-431|+	4|C5702511:709-720|-	0.8	0.38	0.99	GGGAGGTGGTGGTCCTGGAGATACCTCGGCGACTGGATGCGTTCAATGAGAGAATCGAAGTCCGGATCGAAGTAAGCCCCGCCACCGCCTCCTCCTGCTCCACCGTCCACCAGCCCCATCCTCATCCCTGATGACATTACAGTAGTACTGTAAGATCCCAAAACCACAAACAATATCTCTAATTAATCTTGAATATCCCT	CAAATACAATCATCAACAACCTCTTCTCTTTCAGAATCAATCAATCAAAAAGAAAAAAAAGAGAGAGAATGAACAACAAGTTGTAAAATCCAAAATCAAGAAGCGAATTGCACACAAAAAGATATTATAAAATATATGCATTAATATTGATAATATCCAGCAAAATCATCGCCATAAATGCATGGGAAATTAAACCAAAG	ACTGTAAGATCCCAAAACCACA	57.553	22	97.75	100	TGTGTGCAATTCGCTTCTTGA	59.054	21	96.4	100	188	309	496	AGATCCCAAAACCACAAACA	55.345	20	97.5	100	TGTGTGCAATTCGCTTCTTGA	59.054	21	96.4	100	182	315	496	CCCCATCCTCATCCCTGATG	59.303	20	100	100	CTGAAAGAGAAGAGGTTGTTGA	55.965	22	100
nSSR_1240	CTA	8|C6219622:1237-1660|+	8|C6238099:1058-1081|-	8|C5318346:1072-1095|+	4|C5349700:270-281|-	8|C6055839:1335-1358|-	9|C6373758:1153-1179|-	N/A	N/A	1.61	0.25	0.99	ATGTTAGTGTTTCGTTCCTGAATTGCCTTTGTGTCTATGAAAAAATGAAACAATCTGCTATAGTATGTGGATGTATCACTAGGTAATGACGGGCTTGGTTGAAAGAGCTGTGGCTTCAAACTTTCCTGCAGGAGAACAACAGTCACTTAATTCAAGTGAGAGAGAAACAATACCTGTTGCTGTTTCAGAAGAAGAATCGG	CTCACGCTAGGTCCTCAAAGGCTTCTTTGTGGTCCAGTTTCTTTGCGTCCACTTTCGCCATCTTTGAGACTGATCACTCTTCAGGTGACAAAGAAGTCAAGAGAAGAAGTTATGGTTGGACAAGTGCTGTGAAGAAAGTTGTGAGTGGCAGTTCAATGAGGAGGCTTCAAGAGCGTATTCTGGGGACTAATAGGGTTGAT	TGACGGGCTTGGTTGAAAGA	59.818	20	100	100	AAGCCTTTGAGGACCTAGCG	59.749	20	100	100	162	286	447	GGGCTTGGTTGAAAGAGCTG	59.4	20	100	100	AAGCCTTTGAGGACCTAGCG	59.749	20	100	100	158	290	447	AGGTAATGACGGGCTTGGTT	59.303	20	100	100	AAGCCTTTGAGGACCTAGCG	59.749	20	100
nSSR_1243	CTC	5|C5857476:76-490|+	N/A	5|C5237221:415-429|+	5|C5311700:225-239|+	N/A	N/A	4|C7051426:695-706|+	4|C5671303:397-408|+	0.49	0.38	0.98	ATTATCTTATGGCTGCTCGACAACTCACCAAAAGGCGTGCAGGAGCGGCTCGGCTTCTTCGGCATCGGGATGTCTACACCAACGTCGACACACTCCCTGTCTTCCTCCAAGAACACTACATCTTCATGCACAAGACGACGCACCACGCCTACCGCCGCTCGTACTAGAACCTCACCAACAATACTGTCGACCTCCCGTCT	TCCATCCCCTTCGCCGCCACAACGTTCTTCATTTTCATGTATTTGGTTTCGTCCAACATGTAAAGTTTTATGTACTTTCATGCTTGTTAAAAACTGAAACTAGTGAAGTTTAAGATTAATGGTTCGGATGTCTTTTCATTTTCATGTTAATATGGCCTGCTAAAGGGCAATGGTTCAATGATATCTTTGTGATGTAATCC	GCCGCTCGTACTAGAACCTC	59.971	20	100	100	TACATGTTGGACGAAACCAA	55.21	20	100	100	124	228	351	GCCGCTCGTACTAGAACCTC	59.971	20	100	100	TTACATGTTGGACGAAACCA	55.21	20	100	100	125	228	352	CGACACACTCCCTGTCTTCC	60.038	20	100	100	TACATGTTGGACGAAACCAA	55.21	20	100
nSSR_1245	CTC	5|C6086100:254-668|+	N/A	5|C5337981:1745-1759|-	N/A	N/A	5|C6397164:438-452|-	6|C6933172:226-243|+	4|C5670133:311-322|+	0.63	0.38	0.99	AAAGACACAAATTCGTACCTCATTCACATGCCAAACCAAAACCAAACACAAAACAAAGAACTTCAAGATCAAGAACTCAAATTCACCATAAAACCGAACACCAAATCAAATCTAAGAACCATAGAATCGACAAGAGAATCCAGGATGGGGTAGAATCACACCTGAATCGAGATTTCTTCGCTTCCCCATGGCTGGAGGGA	CTTTGTCTTGGAACCGAAACGAATCGAATCGGATTGGGGTATATGTTTGAGTTAATAGAATAACCAACGAGGGGTTTCCGACTTTCCGTTTCCCAAACCCTCGAGATCCCCTCGCACGCACCAAAGGCAGCATAACTTATTCCTCTTTTTAAAGTTTAACTATCGTACTCCAACCCAATAAGGACAATCGCTTAAGCATC	TTTCTTCGCTTCCCCATGGC	60.965	20	100	100	TCTCGAGGGTTTGGGAAACG	59.966	20	100	100	149	372	520	TTTCTTCGCTTCCCCATGGC	60.965	20	100	100	GAAAGTCGGAAACCCCTCGT	59.966	20	100	97.5	129	372	500	TTTCTTCGCTTCCCCATGGC	60.965	20	100	100	CGGAAACCCCTCGTTGGTTA	59.965	20	100
nSSR_1246	CTC	5|C6105256:289-703|+	N/A	5|C5215845:579-593|+	5|C5339494:423-437|+	6|C6070913:1434-1451|+	N/A	5|C7131722:1350-1364|-	N/A	0.4	0.38	0.99	AATCGAGGAAACTTTTGGAGAAGCCACCCCAGGTGAGGATCTCGACAAGGAGACTTGGATACAATTAAGACCATCCATCGAGGAGCCCCCAGAGTTTGAACTAAAGAAGCTACCAGAGCACCATGAGTACACGTTCCTGGAGCTAGATATGGAGGACCTCCTTGAGCATGCATCGCCATCCGGTAAGGAAAATGAAGACA	CTTTTCTCAGAGGGTGCTGTCACAAAAGTTGAATAAACAAGTCAAGGCCATGTTTAACGAAAAGGGAGTTTGTTCGATCCAACCCAGCATTGATGACACTGCAATCTATGAACCATTGGAAGAAAACCTTATTGTTCAAGAAATCGACAGATGTCACAGTAAATTAGTCGCAACACAAAGAGCCGAAAGAAGATATCATT	CTTGAGCATGCATCGCCATC	60.04	20	98.75	100	TGCTGGGTTGGATCGAACAA	59.89	20	98.75	98.75	144	360	503	GGACCTCCTTGAGCATGCAT	60.107	20	100	98.75	TGCTGGGTTGGATCGAACAA	59.89	20	98.75	98.75	151	353	503	CTTGAGCATGCATCGCCATC	60.04	20	98.75	100	ATGCTGGGTTGGATCGAACA	59.672	20	98.75
nSSR_1249	CTC	5|C6136477:104-518|+	N/A	5|C5246339:459-473|+	4|C5358052:248-259|-	5|C6046597:324-338|+	N/A	4|C7113972:1195-1206|-	4|C5732121:631-642|+	0.5	0.25	0.99	ACCCATTTGAGCTGCTTTCTGGAGCAATGCAGTGGCTGACATGTGTGGAGATGCTACTGAGCTTTGGTAGTGACTTGGGAGAGAAACAGCTGGACCTTGGTTTTGATCATGTGAGTACTCTTGTTCTAGTCTTGTGGAGAAGATTGTACCAGCTTGTGTCATTTCTCCTCCTTGGCAAGCCAGCCATGGTGGTATCTGAT	TCATGTTGAACTGCTGCTCTCTCTTCAGTGACAGCTCTTGAACTTCATGGCTGCTGTTCATCATGCTGTTGTTGCTGTTGCCATTGCCATTAATGTTGTTGTGAGTAGTGAAGAGAAGTGGATGATGATGATGATGATGATGATTATGATTGATCATTGGATTTACAGCAGTAGTGATTGCTCTTGCACTCTCCTCTGCC	TTTCTCCTCCTTGGCAAGCC	60.251	20	98	100	GGCAACAGCAACAACAGCAT	60.25	20	100	100	136	264	399	TTTCTCCTCCTTGGCAAGCC	60.251	20	98	100	AGCATGATGAACAGCAGCCA	60.323	20	100	100	121	264	384	TTTCTCCTCCTTGGCAAGCC	60.251	20	98	100	GCATGATGAACAGCAGCCAT	59.255	20	100
nSSR_125	AAG	5|C6212168:2131-2545|+	N/A	6|C5339153:1498-1515|+	N/A	8|C6045399:608-631|+	5|C6327190:569-583|-	5|C7134060:1635-1649|-	5|C5715939:945-959|-	1.11	0.25	1	GCAATGCTTTGAAACACACTCTTGAGCAACAAAGCATGAAGAATGCGAAGACAAAACAGTGTGGAAGCAAGAATATTGATGAGAGTTTTGATAACAAGCTTCAGTGTTTGTCTTCATCGCCTAAGTCTCTCATTCCAAAGTTAAATGACAGTGATGAAGAACTACTCGGAGAACATAGTGATGATAAGAAGAAGAAGAAA	AAAATGAAGAAGATGATGATGATAATGAATAAGGGATCACAAGAGGATTTGGGTTGTAGGGTGAGGACATTGAGAAGGATTGTGCCTGGTGGAGAGGAAATGAATGCTTGTGAGCTGCTCTCAGAGATGGAGAGTTATGTTATGTGTTTGCAGATGCAAGTGTACATTCTCAAGTCTCTTGTTGCTAACCATTGAAGAAT	TCGCCTAAGTCTCTCATTCCA	58.265	21	100	100	TCCACCAGGCACAATCCTTC	59.962	20	100	100	192	316	507	TCGCCTAAGTCTCTCATTCCA	58.265	21	100	100	CCACCAGGCACAATCCTTCT	59.961	20	100	100	191	316	506	TCGCCTAAGTCTCTCATTCCA	58.265	21	100	100	CTCCACCAGGCACAATCCTT	59.961	20	100
nSSR_1250	CTC	5|C6150125:552-966|+	N/A	N/A	5|C5386326:1042-1056|-	5|C6075191:669-683|+	5|C6321506:492-506|+	4|C7110016:1175-1186|-	4|C5587071:322-333|+	0.47	0.25	0.98	ACCTCAAAACTCAAGATGAGTCATCATCCCCGATGAAATCATCAAGAGTGCAACCATAGCATGGGTACAAATAAAAATCAAAGTAACAGGAAGGGGACCAGAACAGGACTCCCCTATGTTGTGCCATTACTAGGCACTGCACCGCTCGGTCCGCTATCGACTGGTGGTTGTGGGGCTGGAGGGGGTTGCTCATCATCTGT	GAAAAGCTCAACAACGCGCTGCAGTAGCATAGTGTGGTGCTGTTGGAGCTCGATGTGTTGCTGTAGTAGAACTATGATTTGTTGCATCCTAGCTACCATCTGGTGTAACACGGTGATATCCTGGCAAAGCAATGAAATCTACGAATCCTCTACATCCTGCAATTGTTGCCTTCGGCGTCTAGGAGGAGGAGAGCTATTGG	CGCTATCGACTGGTGGTTGT	60.109	20	100	100	AGCAACACATCGAGCTCCAA	59.965	20	100	100	126	351	476	CGCTATCGACTGGTGGTTGT	60.109	20	100	100	GCAACACATCGAGCTCCAAC	59.833	20	100	100	125	351	475	CGCTATCGACTGGTGGTTGT	60.109	20	100	100	CCAACAGCACCACACTATGC	59.477	20	100
nSSR_1252	CTC	5|C6217762:921-1335|+	N/A	4|C5311246:1255-1266|+	4|C5364416:1102-1113|+	4|C6060867:706-717|-	N/A	4|C7096998:628-639|+	4|C5746277:636-647|+	0.37	0.25	0.99	TTGAGATTTAGATTGGTGTGAGAGCTTAGTGGAGAGAGAGATAAGAGGAGTTTTAGAGAGAGAAACCTCCTTTTTTATAATCAGATTCCTTGTTTGCTATTGGGGTCAAATGGGGCAGCTGCTGGCAAGGGTCTCCCCATGGTTTGACAGACATAGATCATGGCCATGGGAGTCCAAGCACTGCCCTTTTGATGCTGCTT	TCCTTCTGTGCCCAAGTGGGTCCCACTCTCCACTCCATCCTCACCATCCAAACTGCCACTCACCATCATCTCCACCATCCATTGCTGCACCCCTGTGAACTCACAGCACAAACACACACTCACATCCAATGATCCAATTCATTGGCAGTTGGAATTATTGGCCTTGTGATAATAAATTCATATACCATCATCCCCTGCCT	GTCCAAGCACTGCCCTTTTG	59.967	20	100	100	GGCAGTTTGGATGGTGAGGA	59.962	20	100	100	101	371	471	AGTCCAAGCACTGCCCTTTT	60.106	20	100	100	GGCAGTTTGGATGGTGAGGA	59.962	20	100	100	102	370	471	TCCAAGCACTGCCCTTTTGA	60.106	20	100	100	GGCAGTTTGGATGGTGAGGA	59.962	20	100
nSSR_1254	CTC	6|C5937687:50-467|+	5|scaffold20477:795-809|+	6|C5332583:1809-1826|+	N/A	5|C5698015:233-247|-	6|C6270320:478-495|-	N/A	N/A	0.49	0.38	0.99	AAAAAGAAAGAAAACTCACTCACCATAATGGAAGCATCATAAGAAAAGGGAGCTAAAACAGTGCTCATGAAGCACGCCGGCGTGGTAGCCAATCCCAAGTCAAACACTTCACACCCAGCTCTCGCCAGTCCGGCGAACACCGCCGCGCTCAGCCTCGGCCCCGAAATCCTCGGATCTCTCCCTAGCGACACTCTCACCTT	CTTCTTCTCCTTCTTCTCCACCACCCATTCTCCGAAGCTCTCGGCAATGGCTTCCACCGCCTGAGGCGTGAGATCCAATCTCCTCCCTTTCTCCCCTCGATTGCGACTCCTCGAACATCGGAGCCGTTTTGGAGTCTTCTTATCCGGTCGGCGTCTTCGTTGTCGGCGGAGATGGATGGTGTTTCGAGCTGGCTCGCCGC	CTCGGATCTCTCCCTAGCGA	59.964	20	100	100	TTCGAGGAGTCGCAATCGAG	59.901	20	100	100	165	217	381	CGTGGTAGCCAATCCCAAGT	60.035	20	100	100	TGGGTGGTGGAGAAGAAGGA	60.105	20	100	100	165	129	293	CTCGGATCTCTCCCTAGCGA	59.964	20	100	100	GTCGCAATCGAGGGGAGAAA	60.108	20	100
nSSR_1257	CTC	6|C6193584:1138-1555|+	N/A	6|C5193303:619-636|+	N/A	6|C6026101:970-987|+	N/A	2|C6794035:212-217|+	2|C5721893:461-466|-	1.96	0.38	0.96	GCACAGAGGGGCCTCTCGCTGTAAACAAACAGGGGTATGATTGGAGAGGGGTTGGCTACTTTGCTGGTGGGGTGGTACCTGCATGAACCAAAGACTCAGAAGAAATCAATGACCTATATACACATGACTACTCCACGCTCTCAACTGCTACCAAAACTACTCTTTTTGAGTTTTTCAATCATTCATCAATGTTGCTGCTG	CTTTCTATTATGTTTATTTATAAGGACACTCCATTCCAATGTCCTCTTATCATACATTGTAGCTGGGAGGGAGGGACGGAGGGAGTTTGGTATCACATGCCTGTGATGCCTCCCAACACTAAAACTCACATCAAAAGCGTGATTAAGATCATGAGGAGGAAACAAGTCAATAGTCAAGAACCAACCAGTATGCCAAATTA	CACGCTCTCAACTGCTACCA	60.038	20	100	100	CCTCCCTCCCAGCTACAATG	59.528	20	97.5	90	159	333	491	TCCACGCTCTCAACTGCTAC	59.756	20	100	100	CCTCCCTCCCAGCTACAATG	59.528	20	97.5	90	161	331	491	TACTCCACGCTCTCAACTGC	59.756	20	100	100	CCTCCCTCCCAGCTACAATG	59.528	20	97.5
nSSR_1259	CTC	7|C5899188:151-571|+	7|C6068534:237-257|+	7|C5130847:284-304|+	N/A	N/A	N/A	6|C6983564:347-364|+	7|C5698657:603-623|+	0.4	0.38	0.98	GGGACACACACGACTTTAGAAAGCAAACATAAAATGCTAAGAAAATTAAGGACACTCTTGAATCTTCATTCCATTAGAGAGCTCTGAATTCAAAAAGAGGAGCCACAGCAAGTTGGGAGCAAAACTAGTAATAACTTCAACATTATTACTGCTAGCTAATATAGTCTGTCTTATGAATCTTAAGTGATGATCATCATCAT	CTTAAACTTCAGTTCCTGATCATAACCCAACCAACAACATCAACAACATTGATCATCAGCATTAAACCAAGCATGAAACTCCAATGAATCAATCAAACAAGAACACAAATTAGTATAAGTACTGTTTAATTAATTAATTAGTTAATTACCAGACTCTCTGGGAGCATTGCACCGAAAACACTCCATCCTGCTAGCAAAGT	AGAGGAGCCACAGCAAGTTG	60.251	20	100	100	TGTTGATGTTGTTGGTTGGGT	58.538	21	100	100	171	245	415	AAGAGGAGCCACAGCAAGTT	59.524	20	100	100	TGTTGATGTTGTTGGTTGGGT	58.538	21	100	100	172	244	415	AAAGAGGAGCCACAGCAAGT	59.524	20	100	100	TGTTGATGTTGTTGGTTGGGT	58.538	21	100
nSSR_1260	CTC	7|C5934089:121-541|+	6|C5965798:266-283|+	7|C4941408:271-291|+	7|C5239068:208-228|+	N/A	N/A	6|C6995544:499-516|-	N/A	0.49	0.38	0.99	AAACCAATGGTAAGCCACATCTCCCTCTCAACGCTCTTATCGGATCCTCTGCCCTCCTCAGCTGGCATCCGATAGCGACAAATCGGGCACGATCCGTGGATCTGCAACCACCTCTCTATACACCCACCGTGATACCTATGCCCGCATGGCATCTCCTTCACCGTCTCCCCAGCCACCATCGCATCCAAGCACACCGAGCA	CCTCGCCTCCACCGACCTCATCGACTCGATCGACGCCTTCGACGCCGGCGGCGGGCCACCTCCTCCGAGGATCTCGGACACCAGCTCCGCGCCCCCTTGCAGGACAACCATCCCCTGCGTCACCGGGTTCACCAGCACAACCCGATCCGACAACGGCGGCCCCACCACTCTGAAGATGATCGGGAAGAACCTCGCCCTGC	CCCACCGTGATACCTATGCC	59.965	20	100	100	AGCTGGTGTCCGAGATCCT	59.999	19	100	100	185	242	426	CGTGATACCTATGCCCGCAT	60.037	20	100	100	AGCTGGTGTCCGAGATCCT	59.999	19	100	100	180	247	426	CATGGCATCTCCTTCACCGT	60.108	20	100	100	GGGGATGGTTGTCCTGCAAG	60.967	20	100
nSSR_1266	CTC	8|C6175712:513-936|+	4|C6141445:700-711|+	N/A	4|C5339328:281-292|+	N/A	7|C6322726:466-486|-	N/A	6|scaffold16730:1583-1600|-	1.6	0.38	0.99	TTGTTCTTTAACCACCCCAACCAACTTGGTCCTCCAAAGCAATACCATTTCATTTCTTTCAAATTGAGAGATAAACAACACACAAGTCACTCCATAGACTTTTCCAACCTTCAATTACCATCCAGCTTACACTTCCTCACATATAACATTCAACATCAATTACTCTTCCTTCCATTAGCATTTAGCAACATGAACTACTT	CGGCAAACCACCGCCGCATCAACGGGAACTCCAAGGTCCCCGGCCGACTCCTCTAAGACTCAACAAGGACTCCCACAAGATCAAAAAGACACAAACCAATGAGGCTTTGCCAAAACCACCAGTTATCATCTACATGGCCTCTCCCAAGATCATTCATACAAATCCAAGAGATTTCATGTCACTAGTTCAAAGACTTACTG	CCATCCAGCTTACACTTCCTCA	59.763	22	100	100	GACCTTGGAGTTCCCGTTGA	59.605	20	100	100	145	317	461	ACCATCCAGCTTACACTTCCTC	59.763	22	100	100	GACCTTGGAGTTCCCGTTGA	59.605	20	100	100	146	316	461	ACCATCCAGCTTACACTTCCT	58.73	21	100	100	GACCTTGGAGTTCCCGTTGA	59.605	20	100
nSSR_1267	CTC	9|C5980734:111-537|+	N/A	9|C5085933:283-309|+	6|C5376826:831-848|-	10|C5984235:425-454|-	N/A	7|C6921294:429-449|+	N/A	1.47	0.38	0.99	CTCAAAGTTTCAAATTCAAACAACTACATAGGAGATTCCAAGGAGTTCACATGAGCTTCATAAGAGTTTAAAAGATGGAATCGATGATATCCAAAGAATGAATTCAAGCAATCAACATATATAGATGTTCAAATATAAAATGTTAGCCAATTGCTTGCAAAGAAGCTGCTAGCAAACCAACAATGGAGCTCTCCACGCTT	CTACCCTTCGTCTCCCTCCTCCTCCTGAGACGAAGGTCCTCTCCATTGGCGACCAACTTCACCCCGCTCCGGCCATACCCGATCATCGGCAACATCCCACATCTTCTCAACAACCGATCGCGCCTGCTCGAGTGGGCCTCTGAGCTCATCCCTCTGAGCCCCACCGCCACCTCCACGGTCGCGCCCTTTGTATTCACCGC	TGCAAAGAAGCTGCTAGCAA	58.392	20	100	100	CCTTCGTCTCAGGAGGAGGA	60.034	20	100	100	108	265	372	TTGCAAAGAAGCTGCTAGCA	58.392	20	100	100	CCTTCGTCTCAGGAGGAGGA	60.034	20	100	100	109	264	372	GAAGCTGCTAGCAAACCAACA	59.391	21	100	100	CCTTCGTCTCAGGAGGAGGA	60.034	20	100
nSSR_1268	CTCCCT	5|C6157901:736-1165|+	N/A	5|C4841489:187-216|+	5|C5253750:337-366|+	5|C5876086:468-497|-	4|C6308350:724-747|+	N/A	N/A	0.4	0.38	0.98	CATCTTGCTTGCCACTCCCTCCTCCTAGATCTCCTCTCAACGATGTCATTATTCTATTACACTTCTCATCCGACATCCATCTAAAATCATTTGAGTTTATCAGATTTTAATCCTATTTTATTTACATTATATTCTGTTTGTGGGTTCAATTCCATATCTGTATGTAAAAATTGTTTAATATCATCTTATTATATACTTGC	CAAGAGGTCATTAATTACTTCCTAACCTGACATCATCCTTCTTATTATTAACCTCTTATGTATTTAAGTGTATTTTTCTAAAGTTTTCATCAAGTTCTTTTTGAATTAAAGACATTCTTAGGCAAATCAAAAACATAAATTCAACTCAAACCTTAAATTGATATTAAAAAAAACCTAAAGTTTATCTATTCAAATCACTT	TCTGTTTGTGGGTTCAATTCCA	58.363	22	100	100	AGGATGATGTCAGGTTAGGAAGT	58.634	23	100	100	137	332	468	TCTGTTTGTGGGTTCAATTCCA	58.363	22	100	100	AGAAGGATGATGTCAGGTTAGGA	58.375	23	100	100	140	332	471	TCTGTTTGTGGGTTCAATTCCA	58.363	22	100	100	GGATGATGTCAGGTTAGGAAGT	57.238	22	100
nSSR_1269	CTG	5|C5940365:21-435|+	3|C6226531:593-601|-	N/A	3|C5375246:825-833|-	3|C5922829:414-422|-	3|scaffold20899:1135-1143|+	N/A	N/A	0.8	0.38	0.99	ATGAGTGTATGTGGTCTGCTAGGTCATATAAAGGTGGTCTCAATTGTTAACATAGCGTAAAATAATGGCCTCCACTTCTTAGTGAATATTTCAAGATCTTGCAAGGACCAAGAATCAATACCACTTGCTTCTACATCAATAATAAAGTTATCTTCCTAAGTAATGAGCATCCTATTCATGAACTAATAAGGTGGAATCCC	AAAATGAAGAAAAGAAGATTGCTCCTGCTGGAAATGAAGAAGAGTAGATTGATATACTGCTGGTAAAGGTAAAGAGAAGGATACAAAGGAATTGCTAAACTTTCAAGAGGTTTAGCTCTCTCCCACAAAACACCAGAAAATCCACACAATGCCTCCCCCCTCTCATCCTGGCTATAAAACGACTAAAACAAGCAGAAAAG	GCGTAAAATAATGGCCTCCACT	59.05	22	100	97.73	TCCAGCAGGAGCAATCTTCT	58.717	20	100	100	193	74	266	AGCGTAAAATAATGGCCTCCAC	59.05	22	100	96.59	TCCAGCAGGAGCAATCTTCT	58.717	20	100	100	194	73	266	TCAAGATCTTGCAAGGACCA	56.749	20	100	100	TCCAGCAGGAGCAATCTTCT	58.717	20	100
nSSR_127	AAG	6|C6059280:27-444|+	7|C6174287:586-606|+	7|C5222319:319-339|+	6|C5359890:374-391|+	6|C6016545:795-812|+	8|C5836512:192-215|-	9|C7072086:879-905|+	N/A	1.07	0.12	0.96	TGTGGACAAAGAATCATATAGCCTGACTCATAAAAACATGTAGTCTAATCTAAGCACTACCTATTTGACATTGTCTTGTAAGATGCTTTGTGATATCACCTTTGTTACGGTTTTGTGAATCAGTATTTATCTCATTAGCACAAATAACTCTGTAAGGATGTAGGTATATATGTTCATATAAAAATAAAAAAAAGAAGAAA	AGCTTCAAGATCTCCTATGGACTTCAACTTTTCTCTTTTGAATTGGATCTTTTCGATCTTTAGTTATTTTTCGATACTAGTTAAGGGTGATGACTATTAGGGTAACTAATTGTAACGCCCCGACCTGAATTCCGGGACCTCGAGCACGTCAGCAGATCGGCCGTACCCAAGTGGAGACGTACCCCACTCGAATACAAGGC	CACCTTTGTTACGGTTTTGTGA	57.642	22	100	100	AGTCCATAGGAGATCTTGAAGC	57.046	22	95.5	100	145	122	266	TCACCTTTGTTACGGTTTTGTG	57.642	22	100	100	AGTCCATAGGAGATCTTGAAGC	57.046	22	95.5	100	146	121	266	CACCTTTGTTACGGTTTTGTGA	57.642	22	100	100	AAGTCCATAGGAGATCTTGAAGC	57.711	23	95.7
nSSR_1271	CTG	5|C6176588:503-917|+	5|C5974756:212-226|+	6|C5301346:777-794|+	5|C5137547:375-389|-	5|C6071759:1253-1267|+	5|C6358964:560-574|-	N/A	N/A	0.37	0.25	1	ATTAACAACTTCTATATGAAAGAGTACTGCTAGCTAGTAGTATAGATAGATATATACATGGCGGGCGATTAACCAGTCTAGTTCCAGTTGATGTTGTTGGAACTGGAAGGAGATGTCATGGCTGAAGAAGGATGGAGAGAAGCTGTGATCTCTCAAGCGTTTTCTGGGGAGAAAATCATTGGTGAGATTGCTTTCACAGA	TTGTTGTTGTCATGACAGTGCTGTACAATGGATTGAAGCCTGTTTGATTCTCTACTGTGTTTGTGAGCTCTCTGTTTGGACAATAAGATGAAATTAAAGAGTGAGAATTCAATTCATTGAGAGATAGAAGGGAGTACAGTTGGAGAGGAGGTGGTGAGAAGTTGCAACCTGTTGGCAAGGAGTTGGGATGGAAGGAGGTA	GCGGGCGATTAACCAGTCTA	59.896	20	100	100	ACAGCACTGTCATGACAACA	57.67	20	100	100	179	260	438	GCGGGCGATTAACCAGTCTA	59.896	20	100	100	CAGCACTGTCATGACAACAACA	59.645	22	100	100	178	260	437	GCGGGCGATTAACCAGTCTA	59.896	20	100	100	ACAGCACTGTCATGACAACAAC	59.644	22	100
nSSR_1272	CTG	5|C6195668:985-1399|+	5|C6053208:248-262|+	5|C5333863:844-858|-	5|C5361292:594-608|-	N/A	N/A	5|C7018348:370-384|+	4|C5688389:689-700|-	0.37	0.25	1	CGCCGATGGGGACGTTGCGCAGAGTGCCCCCACGAGTCCAGTAGCGCTTGCAGGCCTTGCAGAAGTGGCGAGGCTGAGAGAGGCTGTAGTTGTTATAGTAGCAGAACTTGGTGTTTGATGAATTGCAACGGGGGCACTTGAGCGCCGCCATGGATGTCTCCTTTGCATTCTTGATCATCTCCATATTAGTACAATATTCA	TTGTTGCTGTTGTTGTTTGAGAGAAGCATCTCTCACAGCATCATCTGGGAGGAAGAGAACAAAAGATAGTTGAAGGATGGGCTGGAGAGAATGAATAATGGATGGGAGCTAGCGATCGAGGAGAGGAAGGAGAGGAAGGTTCGGTGCCAAGAGGAAGACAACAAAAGAAGGAACAAGTATTATTGAGTGATGGTGATTGC	CCGCCATGGATGTCTCCTTT	60.107	20	100	100	TCTCTCCAGCCCATCCTTCA	59.957	20	100	100	161	344	504	CCGCCATGGATGTCTCCTTT	60.107	20	100	100	CTCGATCGCTAGCTCCCATC	59.83	20	100	100	191	344	534	CCGCCATGGATGTCTCCTTT	60.107	20	100	100	TCCTCTCCTCGATCGCTAGC	60.604	20	100
nSSR_1273	CTG	6|C6174192:301-718|+	8|C6218699:254-277|+	N/A	N/A	6|C6042625:640-657|+	7|C6091038:242-262|+	6|C7035568:389-406|-	N/A	0.8	0.38	0.99	GAGTCTGCTGAAATCTCATTGGCCATGAGGGGAAGATTTCAAGTGTAGGGGGTCTGGTTGTGAGAAATGCTGCAAGGAAGAGAAGATGAAGAAAAACAACATCATCAAGCCTAAACTTAAACCTAAAAACTGTCTGAGAATCAGGAAGGGAAGAGTGGTCTGGCTGTCAGTGATTGAAAAGCAAGTTATTCCTTTCCATT	CACAGCACTTAAAACCTGCAGAAATTTTCAGAGCAGCTGGGGGTATGGGAAATCACATCACATCAGCCAAGTTCTCTTGGCTCATGTGATCACTGTGATGGGAAAAAGGCAAAGGGGGATGCCTTGTGGAGACCATTTCAGACCTGCTGCATGTGTCTGTAAATGCATTCTGGGGAGGTGGTTACATGGTTGGCAAAAAG	GTGGTCTGGCTGTCAGTGAT	59.677	20	100	100	ATGGTCTCCACAAGGCATCC	59.743	20	100	100	200	354	553	GGTCTGGCTGTCAGTGATTGA	59.998	21	100	100	ATGGTCTCCACAAGGCATCC	59.743	20	100	100	198	356	553	TGGTCTGGCTGTCAGTGATT	58.941	20	100	100	ATGGTCTCCACAAGGCATCC	59.743	20	100
nSSR_1274	CTG	7|C6133921:249-669|+	7|C6014170:353-373|-	N/A	7|C5290320:580-600|+	7|C5865378:292-312|+	8|C6160690:229-252|-	4|C7110796:480-491|+	N/A	1.25	0.25	1	CCATAAAGGAAAAGTGGGAGTTTGGTTGATGGGAGGAGAAAAAGGGGGAGCAGGAGTAGTAGATAATGAGTGCGCTGGTGGTCGGGATGATGAAAAGCAGCAGTTTCTAGGGGTGAAGTTGAGGAAGAGAGTGAGTGTTGGTTGGAAGGGTGGTCCATGCACTCCAAAGCCCGACTGGAAGCTGGAGCCTGCTGGCCCTT	CTTTGTCTGCTAGGAAGCTTGGAGCCAACCTTTGGGAGATGCAGGGCTTGTCTCAATCACCATCGGTGAGCAGGAGAGATGGCAAGGCTTCTAGGAGGAAAAGTATGGAGCTTCCTGATGTATCTGCTGTCAGTATGGTGATGTTTTTCTCTGTTTCTCTTTTTGTTTCTCATTCAGTTGTGCTTCTTTGTAATTACTAA	TGTTGGTTGGAAGGGTGGTC	60.106	20	100	100	CCCTGCATCTCCCAAAGGTT	59.96	20	100	100	132	335	466	TGTTGGTTGGAAGGGTGGTC	60.106	20	100	100	CCTTGCCATCTCTCCTGCTC	60.179	20	100	100	173	335	507	TGTTGGTTGGAAGGGTGGTC	60.106	20	100	100	TGAGACAAGCCCTGCATCTC	59.749	20	100
nSSR_1278	CTT	5|C5820910:18-432|+	4|C5847169:258-269|-	N/A	N/A	5|C5924823:209-223|-	N/A	4|C7140922:2831-2842|+	4|C5701015:385-396|-	0.49	0.38	0.98	ATGGGCTTTTTTGGGGGGTTTCGTATCTTTTTCCTCTCACGGCACTTTTCTCTTCGTTGTCGTAATCCTTTGGTGATCATCGAAGGTTTCTTTGCGCTCGTCGGAGTTTGTTTCCTTGTTTTTTAAGGTAATGGATCGTACACCTTCGGATTCTAGGTCATCTGCTTTTCATTTTCCTTCCCCTCTGCCTTCCTCCTCTG	CTGTTTCTGGCTCTGCTGCGTCTGTCCCAGGTATTGAGTCCGGCGAGCCTGTCAACCCTACCTCTCCTCCTCCAGCCTCTGTTTCTGCCGTGTCTAGTAACCCTCTTGTCATCCCAAGAGTCCATCCCGGATCCTCTATGATTGAGAAGGGGAAGTCCGCGGTGTTCATTAGTATCCTTCGTCAGACGGACGTAGATAGG	CGCTCGTCGGAGTTTGTTTC	59.839	20	97.5	100	AGAGGTAGGGTTGACAGGCT	59.883	20	95	100	186	111	296	CGCTCGTCGGAGTTTGTTTC	59.839	20	97.5	100	CTCGCCGGACTCAATACCTG	60.249	20	97.5	96.25	168	111	278	GCTCGTCGGAGTTTGTTTCC	59.488	20	97.5	100	AGAGGTAGGGTTGACAGGCT	59.883	20	95
nSSR_1279	CTT	5|C5948945:132-546|+	N/A	5|scaffold12269:700-714|-	N/A	5|C5726825:275-289|+	4|C6385892:352-363|-	4|C7128256:455-466|-	4|C5715587:554-565|-	0.5	0.25	0.98	GGCCCATGATTGCGAGGATCTCACCGGGCTGAGCATAGCCAGTGACAGCATCAAGGATAACTCGAGGAACACCTTCATTGTTTGAAGCCAAGACCGTTAAGTCCTCCCATGTTAAGTAAACTCCCTGTTCATGATCTCTTGTTTCAATGGAGATCACTTCATGAGTACTCTGCATCTCCACTCCTCCCTTGGCCATGCTG	AGCTTCTTTTTAAGTGTGAACTTCTTGTTATTTATAGTGCATTAATATTGAAGAGAGGAGGGACTAGCTAGCTAGGGAGGTTTTATTTTTTATTTTTATAAAATAAAACTAAAAATCAAAATTGTTGTCCTGTGTTAATATATATTGGTGATGATGTATATATGTAGTTTGGAAACGGGTGGTGGAAGTGATGTGACGTG	GCATCTCCACTCCTCCCTTG	59.82	20	99	100	GCTAGCTAGTCCCTCCTCTCT	59.576	21	98.08	100	116	302	417	GCATCTCCACTCCTCCCTTG	59.82	20	99	100	AGCTAGCTAGTCCCTCCTCTC	59.576	21	98.08	100	117	302	418	GCATCTCCACTCCTCCCTTG	59.82	20	99	100	ACCTCCCTAGCTAGCTAGTCC	59.574	21	98.08
nSSR_128	AAG	6|C6189382:747-1164|+	5|C6029374:395-409|+	6|C5240843:500-517|-	5|C5250658:302-316|-	N/A	N/A	N/A	6|C5689395:803-820|-	0.49	0.38	0.98	AACCAATCCACCTAGCTCCGGTGAGTTGCTCAGCTCCGTATTCCCTCCTCGGCTCCCTGGTAATGCCAGAGACTGTGGTCGGTCGTTCTCTGGTGAGGTTCCCCACCTGGTCGCGGCGTCTCAAGATGGTGGAACTCCCCTGCGGTTCTCTTATGACCGCCGGAGATCTCTGTCAGTGGGTGCTTAGGCCAGAGGGGAGA	AAAATAGGACGGAGACGCTAGGGTTCCGAGAGCTGGCTCTCTACTTATAGGGCTCGCGGAGGATCCCGTCACAATCAATCTTGTTGATAGGGGGATTAAAAGAGATACGGAATAAGATTTACAATATCTGGCCGACACGAGGACGTAGAGGAGAAACGGCCACGACCTCGCTGGCGGAGGAGAACCGAACGGTGGAGCTG	GGCGTCTCAAGATGGTGGAA	60.036	20	100	100	CCCTAGCGTCTCCGTCCTAT	60.251	20	100	100	127	314	440	GGCGTCTCAAGATGGTGGAA	60.036	20	100	100	ATCCTCCGCGAGCCCTATAA	60.252	20	97.5	100	168	314	481	CGTTCTCTGGTGAGGTTCCC	60.037	20	100	97.5	CCCTAGCGTCTCCGTCCTAT	60.251	20	100
nSSR_1280	CTT	5|C6051596:269-683|+	5|C6175965:892-906|+	5|C5275932:501-515|-	N/A	5|C5964371:279-293|+	N/A	3|C6909840:279-287|-	N/A	0.8	0.38	0.99	AAGATTAAGTTCTAAGAATTGATTGTGTATAGAAAAGAAGGTACAAACTTCAACTCTAATATATCAAACTATGTATCAATTAATCCATCTCACAAATTCTAGACACCATGGTGTGTTGCTTTGATCAAGCATTATTATGTTGCTTGGAATATTGGTCTCATGCTGCCTGCCTTTGAAACAAGGCATATATTATAGATATC	TTTTCTGAATTTATGTATATTTGATGAAATATTTGGGAAATTTCTAAGAAAAGACTCATGTTGGACTTGGTTTAAACTTATCTAATAAGATGACTACTTTATTATAGAAAGGAAGGTGGGGGAATCTTAGGAGCTTTTTTATTTTTTATTTATTTTTTTAAGGTTTCTTTAGAGTGTGATAGTACTCATCTCTCTGTCTC	GCTGCCTGCCTTTGAAACAA	59.895	20	100	100	ACCAAGTCCAACATGAGTCT	56.371	20	98.75	100	125	361	485	CATGCTGCCTGCCTTTGAAA	59.681	20	100	100	ACCAAGTCCAACATGAGTCT	56.371	20	98.75	100	128	358	485	ATGCTGCCTGCCTTTGAAAC	59.681	20	100	100	ACCAAGTCCAACATGAGTCT	56.371	20	98.75
nSSR_1281	CTT	5|C6099528:371-785|+	5|C6063790:230-244|-	N/A	4|C5397690:567-578|+	6|C6058557:572-589|+	5|C6399642:2323-2337|-	N/A	N/A	0.63	0.38	0.99	CTTGTTACACATGTGGTCTTGGGCTCATCTCCTTCTGCTATGCGAACTTGGTAGTACCCCAACCTCAAATCCAGTTTTGAGAAATATCTAGCATTCCCCAACTGATCGAACAAGTCAGCAATAAGTGGAATATGGTACTTGTTCTTTACCGTGATCTTATTTAGATCCCGGTAGTCAATGCATATCAATAAGGAGCCATC	CTAAAAGAGCACTGACGCACCAAATGGGGCCTTGGAAGGCCTTATGAAACCAACATCCAGAAATTCCTTCAGTTGCTTTCGAAGTTCCGCCAGCTCTGAATGGCTGATGGTCTTGTGCCAAGTTCCATCTCAATCTGGCGGTCCACCTCCCTCCTTGGATGCAACCGTTTGGTCAAGGCATCCGACATTATGTCTTGGAA	AGCATTCCCCAACTGATCGA	59.088	20	100	100	CATTTGGTGCGTCAGTGCTC	60.11	20	100	100	152	289	440	GCGAACTTGGTAGTACCCCAA	59.998	21	100	96.43	CATTTGGTGCGTCAGTGCTC	60.11	20	100	100	200	241	440	AGCATTCCCCAACTGATCGA	59.088	20	100	100	ATTTGGTGCGTCAGTGCTCT	60.25	20	100
nSSR_1283	CTT	5|C6124813:404-818|+	N/A	6|C5314356:717-734|+	4|C5333618:338-349|-	5|C5933499:357-371|-	10|C6277818:445-474|+	4|C6855680:301-312|-	N/A	2.05	0.25	0.98	AAACAGTAAGTAAACTAGAGCAGCATATATACCAAAAGGACAGAAAAGGCCTTAAATGCGATTCCTCTGTGGAGCACCAGCAGCTTCTCATATAATGGAGAGACCTGACCTGGGTGTCAATTGTCAAATTCATAGCATACAATCATAACAAGTCCCAGTCTCTTCTCTCTCTCACTCTCTTTCACGGCCACCTTCTTCTC	CATCTCCTCCTTTTCCTCTATTATATCTTTCTCTCTCTAAACAAAAACGAAAGCTTTTTAACTGACCTTTTTAAATGCCTTTGTCTCATACGGCCACACACTCTCTCTTCTCCAAAGTTGAAGAAACAAAAGAGAACAACACATGCTTGTCCTTAGTCTAAAACCCCAAGGCTATTTTTGTCCCATCACACCAAACTTTT	TTCACGGCCACCTTCTTCTC	59.965	20	99	99	GTGTGTGGCCGTATGAGACA	60.038	20	99	100	136	380	515	TCTCTTTCACGGCCACCTTC	59.965	20	100	98	GTGTGTGGCCGTATGAGACA	60.038	20	99	100	141	375	515	CTCTTTCACGGCCACCTTCT	59.965	20	100	97	GTGTGTGGCCGTATGAGACA	60.038	20	99
nSSR_1285	CTT	5|C6179536:638-1052|+	3|C6114775:393-401|+	N/A	5|C5303692:296-310|+	5|C5972309:370-384|-	5|C6278804:550-564|+	5|C7074718:375-389|-	N/A	0.75	0.25	0.99	TCTGTCTTTATCATTGGCCAACAACCATCACCGAGCTCCGATCGGATTGGTGAACGTGCTGAGAGGATCAAAATTTGCAAGGCCGGCAAAAGAGCTTCTTGAAGAGTTTTGCAGTGTAGGAAGAGGCCAACTCAAGAGTAGAAGATCATTTGGTGGCCAGTCTTCTTCAAACCCTAACCCTAACCCTAATTCTAACGCTG	CAAAGGATGTTGTTTCTCAATTGTCTCCTGCTGATAAGTTTGAGCATCAGAGGAAGAAGGCCAAGCTACTCTCCATGCTTGATGAGGTCTTGATCAGTACATACTCTCTAGATGATTAATCTTTTAGTTTCTATAAATATAATCTTTTACTGCTGCTAGTTAATTAGCTAGTACTGAAGTTAATGAGAATTCCGGCCGGC	GCAGTGTAGGAAGAGGCCAA	59.675	20	100	100	AGCATGGAGAGTAGCTTGGC	59.82	20	100	100	184	310	493	GCAGTGTAGGAAGAGGCCAA	59.675	20	100	100	TGGCCTTCTTCCTCTGATGC	59.746	20	100	100	168	310	477	GCCGGCAAAAGAGCTTCTTG	60.388	20	100	100	TGGCCTTCTTCCTCTGATGC	59.746	20	100
nSSR_1289	CTT	5|C6214052:1251-1665|+	6|C6086178:389-406|-	N/A	N/A	5|C6069355:562-576|-	4|C6346038:293-304|+	N/A	5|C5593691:382-396|+	0.63	0.38	0.99	TCATCCATAATAATCTTGGTAGTAATAATGGGGAAATTGGAATTCTTGGATTGGACTAGGGCTTTCAGAGGCCCACATATAGTTGGGTTAGGTGCCCATGTACACAGGTCACAGGCCCATAGCCATGCTTTGAGAGGAGAGCCCCTCTCCATCGAGTCCCCCCAAACCGCCCCAGCAACCTTTTTTCAGGTACTCATGAG	CCTATGATTATTATTATTTATTGTTATTGGATTTATTGTTCATGTCGAAATCTGGAGTTTCTTGTGCCTATGGAATTCTTCTTTTAGTAGCTGAAATGTTCTGGAGCTGTTTAGTCCTAAAATGGCGGATTTTTCGTTGTCTTTTAACTTGGGAGATTTAGGATGCAGTTTTTGATCCTGTAGTTTTTTTATTTGCCTGT	GCCCATGTACACAGGTCACA	59.964	20	100	100	TCCATAGGCACAAGAAACTCCA	59.358	22	100	100	196	293	488	TGCCCATGTACACAGGTCAC	59.964	20	100	100	TCCATAGGCACAAGAAACTCCA	59.358	22	100	100	197	292	488	GTGCCCATGTACACAGGTCA	59.964	20	100	100	TCCATAGGCACAAGAAACTCCA	59.358	22	100
nSSR_1292	CTT	6|C6197802:592-1009|+	6|C6226737:387-404|+	6|C5324872:676-693|-	N/A	6|C6066643:851-868|-	N/A	7|C7114740:890-910|+	7|C5718683:475-495|-	0.47	0.25	1	AGGTGTAGTTGTTGCCTTTAAATCCTCTCATTTCTCTGTTCTACTTGTCCTAGATTTGTTTTATCATCCCTCATTTGAAATGGCTAATAAGAGTTTTTGGTGAATGCACAGGTAGAACATTTTGTTGTATGCCATGGATTGTGAACTTCTGGTGTCTGGTGATTCCCTCTATGCTCTGACTGCCACCAGAGACCGACTCC	TTTGTTTTTTGTTTTTTGTGTTTTTCCTTTTGTTTGTATGTGTGTTGGATTGCCGTTGGGGATGATTTCACATCTTATTTTACATAGCAGAACACTGGTGTAGTGATCATTTAGTAACCAAATTCAGCATACCCCTCATTAACAGCAGTGATACAGGCCGATTCTACGTTTTTATCTCATTCAGTCTCCCACTTATTATC	TATGCTCTGACTGCCACCAG	59.461	20	99	100	CCAACGGCAATCCAACACAC	60.319	20	100	100	108	369	476	CTATGCTCTGACTGCCACCA	59.461	20	99	100	CCAACGGCAATCCAACACAC	60.319	20	100	100	109	368	476	TATGCTCTGACTGCCACCAG	59.461	20	99	100	CAACGGCAATCCAACACACA	59.616	20	100
nSSR_1293	CTT	6|C6198486:1539-1956|+	5|C6222921:572-586|-	4|C5267200:701-712|+	6|C5329246:649-666|+	N/A	5|C6252982:397-411|+	3|C7141422:330-338|-	N/A	1.07	0.25	0.99	CCGCAGGCTGCACAACGGAGTGCGCTGCTTGTCCCTTCCTCACCATCAGCCATAAACTCCCTGCAACCATCAACAGCATAGCCACCAATGTTTGCTGCATGGTTTTTCTGACACTCTCCATACCTAGAACTTCTCCTCCTTGTGCACACTCTACTTGGTCCTCTGCTCACTGGTTCACACCTTCTCAACACCAAGCTCTC	CATCACCTTCATCAATATCATCATAATGTCCTAGGCCCAAACTGTAATCTATTCTTCCTGAATTCTTATAGCTTGCTTCTATGAAGAAATCTTATTATCTGTAGACCTAAAGGTTCGGCTGAATTGATAGTCCAACCAATTCCACTTCACTAGCTAGAAACGAAGTTTTGGGGCCTTGCTTTGCTGGAAAGCTCTTTTGC	CTTGGTCCTCTGCTCACTGG	60.037	20	100	100	ACAGTTTGGGCCTAGGACAT	58.627	20	100	100	110	353	462	GGTCCTCTGCTCACTGGTTC	60.037	20	100	100	ACAGTTTGGGCCTAGGACAT	58.627	20	100	100	107	356	462	TCTGCTCACTGGTTCACACC	59.893	20	100	100	ACAGTTTGGGCCTAGGACAT	58.627	20	100
nSSR_1296	CTT	6|C6209794:1544-1961|+	6|C6201083:332-349|-	6|C5268984:404-421|-	N/A	N/A	6|C6397796:1206-1223|-	7|C7003690:315-335|+	7|C5757977:1415-1435|+	0.47	0.25	0.98	CTTTCATATGATCTTATCATGTAGATGGTCAGCCATTGCTGCCAAGTTGCCTGGGAGAACTGACAATGAGATCAAGAATGTGTGGCATACTCACTTGAAAAAGAGAGTGAACTCAAATGAGATGGTTAAACAACCCAAGAGTAAGACTAGAGCTAAGATTAGTAAGAAGGAAACAGCTTCTTCCTCTTCTTCTTCTCCTC	CTGCTGTATCACCTTCAAGATCCTACAGTGATCTCTCAACATCAGTAATCACAGAAGATAACAACAATAGCAGCATTAAAGATCATGTTCAGTGGCTGAATTCTTCAATTGATCAACTCCCAGAGGTTGATGAGAGTTTCTGGTCTGAAGTGGTGATGCCCATGGATGTCCCTCTTGATGATCAGCCTTTCAAGTCATGC	GTTGCCTGGGAGAACTGACA	59.891	20	100	100	AGGATCTTGAAGGTGATACAGCA	59.223	23	100	100	197	245	441	AGTTGCCTGGGAGAACTGAC	59.602	20	100	100	AGGATCTTGAAGGTGATACAGCA	59.223	23	100	100	198	244	441	GTTGCCTGGGAGAACTGACA	59.891	20	100	100	GGATCTTGAAGGTGATACAGCA	57.857	22	100
nSSR_1297	CTT	6|C6213428:1046-1463|+	5|C6060272:508-522|-	6|C5336415:519-536|+	6|C5382488:685-702|-	6|C5963669:621-638|-	N/A	N/A	N/A	0.4	0.38	0.99	TTGTCCTCCCCTGACGAGGAACTTTCTGAGGGCATTGGCGTCTCGTCCTGAGGGGGAATAACCTCCCGAACAGGAACCGTCTGCTTTGCCTCCCTCGGAAGGTGGCTCGGCTCCTTTGTAGGGCATTTCTTTCTCCCCAAAGACCCCTCGATGGTGCCCTTTCTCTTCTTCTTTGAAGACTCGGCCTTCTTCTTCTTCTC	CAAAGAGCCCGGGCTAGCAGACGCGAACTCGGTCAACAAGGAACGGGCAAGCTGTTAAGAGTCCATTTCCTCACCTGCAAGACCACAATGATGGAATTAGTAATCAGCCGACTCATGTTCTAGCTGAAAAGAGTAAGTATGGACGGACTACCTATGGCTAAGTAAGGACCACACTTCCAAAGTTTCTCTATCATTAAATA	CCAAAGACCCCTCGATGGTG	60.393	20	100	100	GTGGTCTTGCAGGTGAGGAA	59.891	20	100	100	168	336	503	CCAAAGACCCCTCGATGGTG	60.393	20	100	100	TAACAGCTTGCCCGTTCCTT	59.89	20	98.75	100	139	336	474	CCAAAGACCCCTCGATGGTG	60.393	20	100	100	TTAACAGCTTGCCCGTTCCT	59.89	20	98.75
nSSR_1298	CTT	6|C6222994:3171-3588|+	6|C6116541:397-414|+	6|C5298986:769-786|-	N/A	N/A	N/A	7|C6881934:399-419|+	6|C5738139:1100-1117|-	0.4	0.38	0.99	TAAATAAGATCTAAGATCAAAGATCAAGGATTTCTCAACAATCCGATGACCGTGATGAGGGATTACCGGCTGATCAGAGAGATCTAGGGTCTGGACTTCAAATCGGGAGAGAAGGAGAGCGTTGGGGACGCCGGTTTGTCCCTCGCCGCCGCCGCCTGCCAAGACGACTATGGGGCCCGGTTCCCATCCTTGTTCTCGTG	CTCCTTGTTCTTCTAGGGGGTTGGGGGCGAGATGAGCGAGAGGAACCCAGGCGGCACAGAAAATCGGAAAATCAAACTTCTTGCTTCCCTTTTCCATTGCAAGCCAATTTAATATTTATCAATAACTAGTAAATTACTCTTTGCATTGGTCACGATGAATCTAATATATATACTTTTTAAAATCAAAATATCCGATTCTC	GAGAGAAGGAGAGCGTTGGG	59.825	20	100	100	GGTTCCTCTCGCTCATCTCG	59.97	20	100	100	159	306	464	GGAGAGAAGGAGAGCGTTGG	59.825	20	100	100	GGTTCCTCTCGCTCATCTCG	59.97	20	100	100	160	305	464	GGGAGAGAAGGAGAGCGTTG	59.825	20	100	100	GGTTCCTCTCGCTCATCTCG	59.97	20	100
nSSR_1299	CTT	7|C6100130:85-505|+	5|C6238173:2047-2061|+	6|C4962348:191-208|+	5|C5369306:480-494|-	7|C5919405:355-375|+	7|C6173840:460-480|-	N/A	N/A	0.9	0.25	0.98	TTGGTCTTCTCTAGCTAACTAGATGAATACAAGCCATGAGGCATCAATCATACAAGATGACGATATTAACAATGAGAAGAGAGTAATAAAGATCGAACCCTACAACTTTGGAGAGACTCTTACAAGGAACCCTTCACCCCAATCTTGAGAGCGAAGTCCGACACAAATTTGTCTATCTTCTTTGCAAGCCCTAGCTTCTC	CTCCTCTCCTCTCCTTCTAGTATGAGAGAAAAACCCTTAGCTCCTCTCATGCCACACCAAATTTTCCCTTGGTTGTTGAAAGAGTCCCCCAACTTATGGTTTAACCTAACCATACATCTCTTAATGTGGTGGAGGTCCACATCAAGGAGTTTGAGTCTAGCCTAAATGGAGTTGACCCAACCCAATAACAAGGAATCCGA	GAGAGCGAAGTCCGACACAA	60.039	20	100	99	TTGGTGTGGCATGAGAGGAG	59.674	20	100	100	135	230	364	TTGAGAGCGAAGTCCGACAC	60.039	20	100	97	TTGGTGTGGCATGAGAGGAG	59.674	20	100	100	137	228	364	GAGAGCGAAGTCCGACACAA	60.039	20	100	99	GGCATGAGAGGAGCTAAGGG	59.604	20	100
nSSR_13	AAAC	7|C6193748:1205-1632|+	7|C6236939:1063-1090|+	N/A	N/A	7|C6034727:1192-1219|-	N/A	5|C7137674:1046-1065|+	5|C5757845:1370-1389|-	0.98	0.38	0.99	CCCATCTTGTGAACAATTTGGGCTACTTCCTTGAATCCATTACCATCTTTAGATGAAGGCCACCTATCAGGGTCTGGATAGACCCTTCCCCATGGATCAATGGTATCATAGCCATACGCGTTTGCTGATGATCCATTTACATTCTTTCTATACCAGAGATAGTCTACCACAGCATACTAGATGAAATTTGGAAACCAGAA	AAATATTGTTAATGATCTTTCTTCCAAGGAGCACGAGCATTTGAATCAATTATTAATCATAAGCAAAAGCTGTACTGATACCTCATATCCATGTGGAAGAAGTCTCTTTGATAAAATCTCAGCATTATGTAGAAATGCATTTTCATCTATCACCCATGAGAAAGAATCATAAGAGTTCCAGCCTCTGGGTGGCAACATTG	AGACCCTTCCCCATGGATCA	59.954	20	100	100	AATGCTCGTGCTCCTTGGAA	59.963	20	100	100	190	279	468	AGACCCTTCCCCATGGATCA	59.954	20	100	100	AAATGCTCGTGCTCCTTGGA	59.963	20	100	100	191	279	469	TAGCCATACGCGTTTGCTGA	60.109	20	97.5	100	AATGCTCGTGCTCCTTGGAA	59.963	20	100
nSSR_130	AAG	6|C6194520:506-923|+	N/A	5|scaffold20621:499-513|-	5|C5200508:207-221|+	N/A	5|C6281766:460-474|+	N/A	5|scaffold13212:610-624|+	0.4	0.38	0.99	AATATTAAAAGAACATACAAAAAAAATATGAGAAATTATAGAGAAGTATTACAATTGGTAAGTGTAAACAAAGAAGCAGCTCCCTTTAAATCATGCTCCTGAACATGTTCAACAGTGTTTGTTTCATCTGTCATCTCTCCTCTTGAGCTGCAATAATTCACAAAATTTCCCCAAATTTTAGTGCATATAAAAGAAAGATA	CATCACATCATACTTTATTTTCATTTTTAGAATTAATTAATGGGTATTTAAAGATGAATTGGATTATAATGGAATGTATCAAAATTAAGGCCATGCAATGCATGCATTTAATTTCAAAATATTTCCATATTGATTGATAACATCATGCATTTAATTTCAAATTATTTCCGTATTTATTAATAACATGATCGAATCTCATT	CATCTCTCCTCTTGAGCTGCA	59.519	21	100	100	TGCATTGCATGGCCTTAATT	56.624	20	100	100	189	331	519	TCTCTCCTCTTGAGCTGCAA	58.363	20	100	100	TGCATTGCATGGCCTTAATT	56.624	20	100	100	187	333	519	ATCTCTCCTCTTGAGCTGCA	58.137	20	100	100	TGCATTGCATGGCCTTAATT	56.624	20	100
nSSR_1301	CTT	8|C6195492:346-769|+	7|C6020262:330-350|-	6|C5333453:1143-1160|-	7|C5297494:288-308|-	8|C5862150:393-416|-	7|C6172650:450-470|+	N/A	7|C5760043:509-529|+	0.64	0.12	1	AAGAATTGAAGAGCAGCAGCAAGCTGTTGAGCTTCAGAAAGCTATAGAGCTGCAAGGCAGGCGCTTTATGGGTCTTCAGCTGCTTGACCTTAAAACTAGAAGCTTTTCATCCCATTTGAATCCTCCTTCAGTGCCATCTCCCACTATTCCTGCCAACCAAGAAGAAGCTCCACTACCACCTGAACCTGAAGGTATGTATA	GTGATAAAATTATCTGTAAAAGAATGGATCATTAAAGTGCTTTTAATTTTTTCTATTTCTAGAGAAGAATGTTGAGCAGCATAGTCAGCAAGCTGAGAAGGAGGAATCTGGTGGTGAAGTTAGCCCCAATGAGGACTGTGATTTCCAAGAAAGGTTAGGAAAAATATATATAGCTTCAGTTGGTGTTGTGTGTGTGTGTG	GCTCCACTACCACCTGAACC	60.036	20	100	100	AGCTTGCTGACTATGCTGCT	59.748	20	100	100	152	366	517	GCTCCACTACCACCTGAACC	60.036	20	100	100	GGGGCTAACTTCACCACCAG	60.323	20	100	100	185	366	550	CCTCCTTCAGTGCCATCTCC	59.82	20	100	100	AGCTTGCTGACTATGCTGCT	59.748	20	100
nSSR_1303	CTT	8|C6208756:1351-1774|+	7|C6119537:698-718|-	7|C5104173:371-391|-	7|C5145979:194-214|+	N/A	N/A	N/A	7|C5543141:197-217|+	0.4	0.38	0.97	TAATCAAAGAGACATGATTTATTGGTGTGAAAAAGAGAAGTTCTATGTGTCCATTGACCATTTGAACATGACTACTCTTTACTTAATTAACACGGCCTACGCGTCTTCTCCACTAGATCTCTCTTATGTGTTCTCACTCATTTAATTCCTCTTTAAAACCACACCTCCATCTCTCAATCTCTTGCAACTCACAGACATGG	TGTCTTATGATCAACTACTACTAGTGTACTTCATGAAGATTATTAATCTAGTGTTGTTCTACTCTTTGATATTCTTGTTGCATGGCGGCCATGCATTAAGGGCTTCAAGTAGTAGTACTGATCCTCCGGCAATGTATGTGTTTGGTGACTCTCTTGCAGACGTGGGGAACAATGATCACATCCACTTGTCTCTTCTTAAG	TTGCAACTCACAGACATGGC	59.046	20	100	100	GCCGCCATGCAACAAGAATA	59.545	20	100	96.25	132	381	512	CTTGCAACTCACAGACATGGC	60.069	21	100	100	GCCGCCATGCAACAAGAATA	59.545	20	100	96.25	133	380	512	TTGCAACTCACAGACATGGC	59.046	20	100	100	GCCGCCATGCAACAAGAATAT	59.932	21	100
nSSR_1305	CTTCTC	5|C6155243:542-971|+	N/A	N/A	5|C5348138:264-293|+	5|C6000691:959-988|-	5|C6387010:339-368|+	N/A	4|C5613315:465-488|-	0.4	0.38	0.98	TTTGGTGCTTTTCATTCATCCACTTCCTATAAAACCAAAAACCCTAATTCTGACAGTGCTCCTCCAATCTCTCTCTATCTCTGATCTCTCCCTAGAGAGAAAGCTCACTCCTTGGATTCCTTCAATGCCTCCACATCCTCATCATCCTCACCACCAGCACCCCCATTTCCATTCTTCTCCTCCTCCTTGCTCTTTTTTCT	CTTCTTGCTGTTGTTGTTGTAGCTGTGGATGCTCCTCTTCGCCTCCATCTCCTCAACCTTCTGATCCGATGGTGCTCCTCCAAGCCATCCTCTCAAACCAACTCCATTCTTCCAATAGTTCTCACTCTGAACACCATCTCCTCCAAACTCTTGCAAGCCGTCTAATCAAACCCCACCCGCAGCCTCCCCAGCGCCATCAC	CATCATCCTCACCACCAGCA	59.746	20	100	100	TGAGGAGATGGAGGCGAAGA	60.033	20	100	100	146	339	484	CATCATCCTCACCACCAGCA	59.746	20	100	100	GAGGAGCACCATCGGATCAG	59.967	20	100	100	171	339	509	ATCATCCTCACCACCAGCAC	59.746	20	100	100	TGAGGAGATGGAGGCGAAGA	60.033	20	100
nSSR_1307	GA	6|C5707062:1-412|+	9|C6003436:351-368|-	N/A	10|C5234260:356-375|-	9|C6051353:894-911|-	N/A	5|C7128572:1191-1200|-	N/A	1.94	0.38	0.98	AATCACCCGATTACATTGACTCCTAGGGACCAAATCCTCATAAGTATCTAGCTCCTCGGTCATGGGGACAATCAAGGCTGCCAGGGCCTCTGGTTGATCTTGAAGCTTCTTCACCAGATGAGAAAGTTCTTTCCATGGACGCTGATACGTTGAATATGAGAAAGAAAAGGATAAGAAGATAAGATTTGATATGTGAATTT	AAGAAGAAGAGGAGAAATCATAGAAGTTATTGGAAAGAGGATAATTGGACTTTTACTGCTTAACCTCCTTTAAAAGATATTATCGACTATATATAATAGTCTTACAATATGAAAAGATAACAAACAACGCTAAGGATAAGGAAAACACAACTACCCCACTAAAGTCATGGGCTAAAACGAACTAACTAAACTTATCCACA	GGGCCTCTGGTTGATCTTGA	59.379	20	100	80	AGGAGGTTAAGCAGTAAAAGTCCA	59.65	24	96.85	100	198	83	280	AGGGCCTCTGGTTGATCTTG	59.377	20	100	85	AGGAGGTTAAGCAGTAAAAGTCCA	59.65	24	96.85	100	199	82	280	CAGGGCCTCTGGTTGATCTT	59.377	20	100	90	AGGAGGTTAAGCAGTAAAAGTCCA	59.65	24	96.85
nSSR_1308	GA	6|C5846324:57-468|+	6|C6033332:384-395|-	N/A	5|C5139347:358-367|-	N/A	6|C6207444:233-244|-	6|C6943044:224-235|-	6|C5587853:408-419|-	0.37	0.25	0.99	GAGAAAGATATCAGTTATAATGGACAGGATGACTTCTTTTCGTGCTCACAAGAACATTGTCTCCTCAGATCGAGCTTTGAGGGTTCGAACTTCACTAGGAGAAGGATTTGTAGAGAAAGAGGGTGCGAGTGAGCGCTCATGCTTCAGGGGAGCCTCCAATGCTCAAATCAAAGATTCTAAAGGGAGAGGAGAGCAAAGAG	GTGGAAGAAAGGGCCCCTTTGGTATATGGGAAAGTAACAACTTTCTAGGGAAAGTTCACTCCAGGAAACATTTTCACACGTTTGTTATGAAAATGAGCTATGGAAAGTAATGGTATTCTAGTAATTATTTTCCCTTTGACCAGGGAAAGTGATTCACAGGGGTGGGGGTGTGAAAATTATTCCATCGTGGGTGGGAAAGT	GGGAGAGGAGAGCAAAGAGG	59.17	20	100	98	CCCACCCCTGTGAATCACTT	59.594	20	100	100	197	237	433	GGGAGAGGAGAGCAAAGAGG	59.17	20	100	98	ACCCCTGTGAATCACTTTCCC	59.924	21	100	100	194	237	430	AGGGAGAGGAGAGCAAAGAGG	60.622	21	100	97.14	CCCACCCCTGTGAATCACTT	59.594	20	100
nSSR_131	AAG	6|C6213768:1922-2339|+	7|C6236269:1505-1525|+	N/A	N/A	7|C6013417:326-346|-	7|C6386064:1292-1312|+	3|C7131956:384-392|-	3|C5687341:525-533|-	1.8	0.25	0.97	TCTGAGGAAACAGACCTGGAAATTAAAAGAGTTCATCAGGATTGGGATACAGATGAATTTTTTTTTGTCAATTGAGAATGAAAAAGTTCTTGAGAGATAAGAACATCACCTTACAGCTTCAGTTGTGAAGAAGGTATCAGGCCTTGTTCCCAGTTTCATAAACTTCATCTTTGAACTAACTCCTCACAAGAAACAACAAC	ACTAGAAATAGATGTGGTGATTCTTTTGGTCTTGTCTCTGGCCATGCTCCATGTAATTCTGGGGGAAGAATATAAAGCATGCAGAGATGGGCCAGAATACAAAGGAAGAGATGGAAATCTCAGAATTGGTTGGGGTTATATAAGGTGGAAACAATTTAATGCTGTAATTGTTTTGAGGCAGAGGATGGGTGGTCAATGGA	AGGCCTTGTTCCCAGTTTCA	59.444	20	100	100	AGCATGGCCAGAGACAAGAC	60.036	20	100	100	128	338	465	TCAGGCCTTGTTCCCAGTTT	59.444	20	100	100	AGCATGGCCAGAGACAAGAC	60.036	20	100	100	130	336	465	GGTATCAGGCCTTGTTCCCA	59.376	20	100	100	AGCATGGCCAGAGACAAGAC	60.036	20	100
nSSR_1315	GA	6|C6031344:324-735|+	N/A	N/A	N/A	6|C5710703:302-313|-	5|C6305374:569-578|+	6|C7121730:1451-1462|+	6|C5709521:760-771|+	0.4	0.38	0.99	AATCCGTCATCAAATCCGCCCGGATTAAATAGTATACATAGAGAAGTAGAACATGTGCAGAAGACTCACGACGATGACTTTGAAGAGGTTTGACTCTTTGTTTGGAAGAGAGGTCCCCATTCTCTCCGCCGAGAGATCTCGACGAAACCCTAGAGGAGAGAAGAGAGCGCGAGCGAGAACGAGAGCGAGGGCGAGAGACG	AGGGTTTGGGAGGAGTCTCACTGTGGAGCAGCAGCGGAAACGGAAAAGAAGAGGTTTTATTTGGTTGGGTTGCAACCCTAAGCCAGTTGGGTTCGAACCCAACAAACCGGGCTTCACTCCTCGGGATATGTTTTCTCTTAACGGTTGGATGGTGCTAAGAGCTAACCTAATGCTATACGATTTTGGATGGATAAAAATAT	GTGCAGAAGACTCACGACGA	60.04	20	100	100	TGCTCCACAGTGAGACTCCT	60.179	20	100	100	188	254	441	GTGCAGAAGACTCACGACGA	60.04	20	100	100	CTGCTCCACAGTGAGACTCC	59.754	20	100	100	189	254	442	GTGCAGAAGACTCACGACGA	60.04	20	100	100	GTGAGACTCCTCCCAAACCC	59.675	20	100
nSSR_1316	GA	6|C6040356:168-579|+	N/A	6|C4976986:243-254|+	N/A	6|C5771081:269-280|-	N/A	7|C7120242:264-277|-	7|C5633363:244-257|-	0.49	0.38	0.97	ATAATAATAAGAACCCTAAGAAGTCAATTAATCGTACTTGGATTTCAAGCGCTGGATCCTATCCGCCAGGCTATCATCCTTATCGGCGATCGCTTCTTTGGAGCCAAAATAGTAGCGATTCAGAGGATATACATCTACAACCTCACCATCTCCAACGCCTCCATTCTCATCCCCCATAGCACAATCAAAACAAACGATCG	AATTGATTGATAGGAGAAGGGCGTGTACTAGTCGAGTTCGAGTAGCTAGGTATGAATGATAAAAAATAAAAATAAAAAATAAAAAACATAAAACATAAAGAAGAGAATGAAGGAGTAGGGATTTGTTTGGTGGTCTGACTGCTGGAAGCTTGGTGTGACGTGGCACGAACGAGAGAGACCCACGAAGCTTTAACGATTCT	CCTTATCGGCGATCGCTTCT	60.039	20	100	100	ACTAGTACACGCCCTTCTCCT	59.994	21	100	92.86	167	244	410	TCCTTATCGGCGATCGCTTC	60.039	20	100	100	ACTAGTACACGCCCTTCTCCT	59.994	21	100	92.86	168	243	410	CCTTATCGGCGATCGCTTCT	60.039	20	100	100	CGACTAGTACACGCCCTTCTC	59.936	21	100
nSSR_132	AAG	6|C6219832:2290-2707|+	6|C6082130:326-343|+	6|C5249791:457-474|+	6|C5266794:190-207|+	N/A	6|C5958206:265-282|-	5|C7051048:374-388|-	N/A	0.37	0.25	0.98	TATGAACCAAATCAACAATGTTTCTCGTGAATTCTAGCAGAATTTTAAGGTTTTAACTAAAAGATTTCCAATAAATTAACTAAAATTCCCTAAATAAGGTTCCACCTTCCAAAAATCAAGTCATGAATTCTTCCAATATTCGAAAATTATCGAGAAAAGCTACACGCCAACTCGTGATTCCAAACAGTTCAATCGATTTC	GAACCATAGAACAACGAGCAGAAGGGAAGCACCTCAACAAGGATCGTCATAAGGATGACATTAAAAGCCCTCTTCTTGGACGTTCGGGCCCTCCGTTGCATCCTGCCCATCACCAAGGCCTCCTCCTTAGACAGGTACTGCAGCCTCTTCTCAAAGTCCTCGCTTCTCCCACCAAACACCCCACCCCACAACCTCGATAT	AAAGCTACACGCCAACTCGT	60.25	20	99	100	TCCTTGTTGAGGTGCTTCCC	59.89	20	100	100	106	355	460	AAAGCTACACGCCAACTCGT	60.25	20	99	100	CCTTGTTGAGGTGCTTCCCT	59.889	20	100	100	105	355	459	AAAGCTACACGCCAACTCGT	60.25	20	99	100	TTGAGGTGCTTCCCTTCTGC	60.251	20	100
nSSR_1320	GA	6|C6089654:32-443|+	N/A	6|C5317506:822-833|-	6|C5197328:291-302|+	N/A	7|C6343456:377-390|+	N/A	7|C5540635:311-324|-	0.49	0.38	0.98	TGTGAGCCCGCAAAGCCTGTAGTGACGTCCCGCGTGCATGGGCATTGAAAGGGTAGGATCAGGCTGAGGCCTAGAGCTGCTCTCTCCTCTGGTCTTCTTGGCTTTGAGCCAGGAAAAAGTCCTGTTCCTTGGCGGCATGATGGACTCCGGCAAAGTGAGGATGGTGGTGGCCGGCAGTAGTTGAAAGAAAAAGGATGGGG	ACTTGGCGGTGAAGGGGGGAAAGGGCTGGCGTGCGGTCGATCTCTTCTTTCTCTGGTGTGAAACGGCGGTGGGAAGGAACTATGGTAAAGTCGGAGCGATGGTGCGAGGCCGTGCGGTGGCGGCTCGGTTTTAGGTTTGTGAGAAATCGGAGTCGTGCACGGGTTATAAGCATGCTCGTGCTTTATATGCACGGGTGTGC	ACTCCGGCAAAGTGAGGATG	60.036	20	100	100	CCATCGCTCCGACTTTACCA	59.825	20	95	100	171	174	344	ATGGACTCCGGCAAAGTGAG	60.036	20	100	96.25	CCATCGCTCCGACTTTACCA	59.825	20	95	100	175	170	344	ACTCCGGCAAAGTGAGGATG	60.036	20	100	100	ACCATCGCTCCGACTTTACC	59.825	20	100
nSSR_1322	GA	6|C6101548:472-883|+	6|C5960388:355-366|+	6|C5156433:546-557|+	N/A	N/A	6|C6401986:2244-2255|+	4|C7130510:904-911|+	N/A	0.8	0.38	0.99	CAAGGTGGTGGAAATTATTTCCAGACACCTGAAGAGCAAAGAATTTGGTGTTTAAGTTCTGTGAGTTCTGCAAAATGTGGACAACTTGCAACCATGTGTCCGGGTTGTTCTGTAGCTCCCGCAATATCTGGTCTGCTGCTTGCCTCTGAACGCAACAAAACAGACACCATATTAGATCATCAAACTACTAATTAAGAAGG	GTGAAAGCACATTAGGAAGTTGCTTCCGAAGAACAAAAACAAGACCAGAGAACAGGGCAACCATGATATGATGAAGAAAAATTAGAAAAGAAAGGAAAACAGTGGAAAATTGCATGCTAAGATGTACCAGAGGACAGAAAAACAATGTCAGCTAGAAAGAAAAGAAAAAAAGTTTTTTTTCCTTCTACTCATCGTTGCCA	TGTCCGGGTTGTTCTGTAGC	59.966	20	100	100	ATGGTTGCCCTGTTCTCTGG	59.961	20	100	100	180	296	475	AACCATGTGTCCGGGTTGTT	60.106	20	100	100	ATGGTTGCCCTGTTCTCTGG	59.961	20	100	100	187	289	475	TCCCGCAATATCTGGTCTGC	59.893	20	100	100	ATGGTTGCCCTGTTCTCTGG	59.961	20	100
nSSR_1325	GA	6|C6137157:516-927|+	6|C6236889:919-930|-	6|C5337267:2184-2195|-	6|C5324786:502-513|+	6|C6085785:1373-1384|+	6|C6394888:860-871|-	N/A	5|C5612985:219-228|+	0.35	0.12	1	TCTCCAAAAATGCCCAAATTTGTACTCAGTGGAGTGTTAAATGGTTGTTCAGGAAAATGATCCATAGCACGTTCAGGTTGTGAGTACTCTCGTCCAAATGCAATGTTTCCTCCGGAGATGTCATCAAATTGCAGGTCTAGTTCTCCTAAGATGCTTGAAGTTGTGTTCATTGTCATCTCAGCTTCAGTTGTCCTGATTTT	GTCTGACAGACCGGTCTCGTGCCGCCTTTGATCTTCATCATTGAGCTGCAGGAACCTGTTGGCAATGCCAAGGGCCTCATTGCGGTCCTCTGGCCAAGTATGGATTTGTCCATCAATTCCAAAGGATACAAGCAAGACCGGAGCGCCACAGAGTGTGGAAAGCTCAAAAGCCTTCTTCTTCAGGCCTTTAATTCTCCGGC	TGCAATGTTTCCTCCGGAGA	59.31	20	99.17	100	GCATTGCCAACAGGTTCCTG	60.038	20	100	96.67	182	298	479	TGCAATGTTTCCTCCGGAGA	59.31	20	99.17	100	AACAGGTTCCTGCAGCTCAA	59.817	20	99.17	100	174	298	471	TGCAATGTTTCCTCCGGAGA	59.31	20	99.17	100	ACAGGTTCCTGCAGCTCAAT	59.597	20	99.17
nSSR_1326	GA	6|C6137561:558-969|+	6|C6197103:907-918|+	6|C5152031:391-402|+	6|C5328954:815-826|+	N/A	N/A	4|C6886630:361-368|+	4|C5758753:1191-1198|+	0.94	0.25	0.97	TCCTCAACAAGGAGGGTTTCTTACTCAACTTTTGTCCAACAGCATGCTCTCTTTCCACTAGTGTTCAAGAGAGAGCCTCATGAACACCTTGTAATGTCTAAATTCAATACTTTTGCTTGCCCATTTATACATATATACAAGAATGATCATCCCATAGATTCTTATTTTGTATGCCTCTTTAATGCAGTACGTACAAAATG	TGCCCCCAGAGAATGAATGAATGACATTGGATTTTCCAAGTTGAAGTGGATGGAGGTCAAATAAATACTATAAACTGTGGGGATCATTTCCTTTAGAACTCTTGGACATATGCACTAATTCGAACGCATTGTTGATCATTTTGATATGACATAATATTACTTAGAAGAGAGAGAGGCTTGAGTGGCCTAGTGTTGTACTG	AGAGCCTCATGAACACCTTGT	59.298	21	100	100	CCTCCATCCACTTCAACTTGGA	59.96	22	100	100	197	271	467	GAGAGAGCCTCATGAACACCT	59.17	21	100	100	CCTCCATCCACTTCAACTTGGA	59.96	22	100	100	200	268	467	AGAGCCTCATGAACACCTTGT	59.298	21	100	100	ACCTCCATCCACTTCAACTTGG	60.225	22	100
nSSR_1327	GA	6|C6141897:683-1094|+	6|C6241487:2179-2190|+	6|C5266532:855-866|+	N/A	N/A	5|C6391288:827-836|+	N/A	8|C5489741:297-312|-	0.98	0.38	0.99	CAGAAAATTTCGGAGGAGAAATCTGCTACGATTGATAATTATTTTTATTTATCTTTTGGTTTGCAGGATCAATGCCTCTGCTCGAAATCGGCCTTCAGGGATTGAACCTTGTCGAGAGAGGAAACTGTAGAGAGAAGAGATCCAAGTGCTTGTGTATAGGAGATTCTCTGACACTCAAGTTAGCGGCTCAAAAGGGAGAG	AAAAGAGTGTGGTCAAATTTTAAAAGTTTTTTCAAAAAATAAAAAAAATCAAAAATATAAATTAATTGATATATTATTCATTTAGCTAATTTATTACTGTTTTGATTCTTATGACAATTTTTGTTGGATATAATGGTTTTCCATATTAATGTGACCATTGATATCTCAAACATATAGTTTTGTATTTATATGGAAAGGTT	Primers not available
nSSR_1329	GA	6|C6152985:216-627|+	N/A	7|C5203261:462-475|+	6|C5317408:443-454|-	7|C6066669:438-451|+	7|C6159316:441-454|+	N/A	N/A	0.49	0.38	0.99	TCAATGGGGAAAGACTATGTCCATGTTGGTGAAAACCTGGGGAAAGCTCAAACAGCGATCCACCAGTCCTGTCTCTGGCAATAGCTCTAGACAAGGCAACACCCAAAGCTCGAGAAACAGGAACAGCCACAGCATTGCCAACTTGAATGTATCTGGAGTGAATTATATGTTGAAAATTATTTGAAATAAGTGTCTGTCCG	CAATCCAATTTGATCAGAAAATAAGGAAAATACCTCTCTTTTATAGGACCACGGAGTTGGTAATAATCAGGGAATCCCTGAAGCCTTGCATTCTCACGGATAGAGAGCACCCGGTCTTGTTCTGGATGCAAAATTACCTAAAAGCATTGAACAAGTTTTTTGTTAAGGGAGTAATAGTGACACATTCGGGAGTAGCGGGA	ACAGGAACAGCCACAGCATT	60.179	20	100	100	TCCGTGAGAATGCAAGGCTT	59.963	20	100	100	196	316	511	AACAGGAACAGCCACAGCAT	60.179	20	100	100	TCCGTGAGAATGCAAGGCTT	59.963	20	100	100	197	315	511	CAGGAACAGCCACAGCATTG	59.757	20	100	100	TCCGTGAGAATGCAAGGCTT	59.963	20	100
nSSR_1331	GA	6|C6171051:154-565|+	6|C6140921:210-221|-	N/A	N/A	6|C5983971:335-346|+	6|C6397032:1869-1880|-	N/A	4|C5668505:227-234|+	0.8	0.38	0.99	CTTTGGTATTTGACACTTTGTCTCGCTAATTCCATAAAATCCCTTGTACTAAATTATATTACTATTAAGCCCCTAAGATACTCAGCTTGATGATTGTAGATTACAGTGAAGTACAACCTTCACAGATATTTAACAACCATAACAACATGAAATCAATGGGAATTATAAAGATCAAAACTATATATAAGGCTAATTTACAT	AAAATGGATTTCGTGGAAGTTATTGAGATGAAAACCAAAATCTCAGATTGCATACACTCTTTTGTATTCAGTGCCCAGCAATTCAGGATCAGACATCCCAGAAACAGACCAAGATCTTGACCTGCTCAGTGATGAGCGCCTGATGTTCCTCATCTTCTTGGCTTCAATTCTGTGCCATATCACCCAGTAACACATTGTTC	ACAGTGAAGTACAACCTTCA	54.146	20	100	100	CTGAATTGCTGGGCACTGAA	58.75	20	100	100	196	255	450	TGAAGTACAACCTTCACAGA	53.853	20	100	100	CTGAATTGCTGGGCACTGAA	58.75	20	100	100	192	259	450	ACAGTGAAGTACAACCTTCA	54.146	20	100	100	CCTGAATTGCTGGGCACTG	59.112	19	100
nSSR_1332	GA	6|C6171209:400-811|+	7|C6238211:606-619|+	7|C5277584:295-308|-	N/A	8|C6004871:964-979|-	7|C6313220:604-617|+	N/A	N/A	0.63	0.38	1	CGGGATCATCCAGAGGGCCCTTCTTCTCAGTGATTGAGAGCTCCTCGATCTTCTTGAGTTCCGAGGCCTCACCCTCGGCCACTACCGGAGCTACATCTACCGACGGCGGGTCCTCCTCCGTCTCCGGCTCCTCGTCGCCCCATGCCCGCCGCTTCTCTTCCGTCTTCGCCGACTCCGCCGACTCCGCCATCGATGTGTGT	GGTCGGTGAGGCTTAAGAGAAAATCGCAATCCTGATTTTTACTTATAGCCCAAGAAAATCTATTTAAATTAGGTAAAACAAATTTGGTAAGATTTTATACTTACAAATTTATCAGCGATCCTAAATATAACTTGAAAATGTTCTTTTATTTATGTAAAATTATTATTTGATCCTCACACTCTTTTATTGTGACTCCAATA	GCCACTACCGGAGCTACATC	59.968	20	100	100	GCGATTTTCTCTTAAGCCTCACC	59.936	23	100	100	162	277	438	ACCGGAGCTACATCTACCGA	59.818	20	100	100	GCGATTTTCTCTTAAGCCTCACC	59.936	23	100	100	156	283	438	CTTGAGTTCCGAGGCCTCAC	60.39	20	100	100	GCGATTTTCTCTTAAGCCTCACC	59.936	23	100
nSSR_1333	GA	6|C6177874:915-1326|+	6|C5965602:183-194|+	6|C5325618:649-660|+	N/A	6|C5805813:336-347|+	6|C6134116:337-348|-	N/A	5|C5667337:566-575|-	0.37	0.25	0.97	TCTCTGGTATTTAAATTACCGACCTAAATAAACCAAAGACCAAAATATTAGAAAATAAACTAAAATAAAATAAAATATGAATAATAATAATACACAGCCAATGTGGACAAGTTGGGAAGACCCGAAGAGCGGCCCTGAAATCACTGTTAAGTAATATTAGTCCATATTCTGGAACGTTCCATTAACGAGAACTGAGAAGT	CGATTGCCGTCGTCGACTCGAAACCTTGCCAAACGAGAAGATCGAAGAAGTGAAGGAGGACTGCCGAAGACGACGACCCCGACGACGAGATGGGAGTCGACTACTACAAGGTCCTCCAGGTCCAACGTAGCGCCACCGATGATGATCTAAAGAAGGCATACCGCAAGCTCGCCATGAAATGGCACCCTGATAAGAACCCT	GCCAATGTGGACAAGTTGGG	59.682	20	99	100	TTGGCAAGGTTTCGAGTCGA	59.895	20	100	93	148	296	443	GCCAATGTGGACAAGTTGGG	59.682	20	99	100	GTCTTCGGCAGTCCTCCTTC	60.109	20	100	100	187	296	482	GAAGAGCGGCCCTGAAATCA	60.393	20	100	91	TTGGCAAGGTTTCGAGTCGA	59.895	20	100
nSSR_1338	GA	6|C6195338:149-560|+	5|C6226735:1528-1537|-	N/A	N/A	5|C5908599:524-533|-	N/A	5|C7045642:388-397|+	5|C5579367:308-317|+	0.4	0.38	0.99	ATTCTTATGCCTTTTTGAGGGAGAGGTTGGTCATGGCGTTGATTTTCTTTCTAGTTTTTGTCAGCCTCTTGGATCAGGAACTCCTTTGAGGATCGGTCTTCACGTACACAACTCTTTTTTGAAAGAGGAGATCAGAACCGTAGAAAAATAAATCCTAGCGCTCATGCTCGAGGGTACTCTTCAACGATCAAGTCAGATTT	GCGCTTAAGAGAGGGAGGGAGGAAAAGGGATTTTAGACTAGGCTGAAAGCTAGCTTTTCGTCCCCCCAAGGTCTTGTCCTTACCAAGGTATTGGAGATCTCCTTTTATATCTCACTGACACGACTCGCTAGATATTAGAGCCCTTGGAGATTCATTTCCCTCCATTGGATAATTGATTATCCAAGTTTCTACCTTAGCGG	GCTCATGCTCGAGGGTACTC	59.969	20	100	98.33	GCGAGTCGTGTCAGTGAGAT	59.831	20	98.75	100	181	307	487	GCTCATGCTCGAGGGTACTC	59.969	20	100	98.33	TAGCGAGTCGTGTCAGTGAG	59.203	20	100	100	183	307	489	GCTCATGCTCGAGGGTACTC	59.969	20	100	98.33	CTAGCGAGTCGTGTCAGTGA	59.203	20	98.75
nSSR_1339	GA	6|C6197016:726-1137|+	N/A	6|C5216851:348-359|-	N/A	5|C5806187:305-314|+	N/A	4|scaffold29784:741-748|+	5|C5513921:401-410|-	0.75	0.38	0.98	GCGTACAGCTCGTCTCCGGCGCGCGGCTAACAGCTCAATTAAGACACAACCGTTGGATGAAACTTATCAAACCGGTACGCGACGATCTCGTCCGTCCATCACATTACACCGTAACCACGTGCATGTGCGTGTGGCATTTTTGCAAGCTGATCTCTGCGTTCTCTATAATATCATATAAGTCCTTTACTGTAATAACAACT	GGAAAATCTTGGTCCATACCCTGACATTCATGATATTCATGTTCCGGTCCTCATACTAGAGGGATCGACAAATTCACCTCAAGTCCTCATTAGAAACAAAATTACAAATTGGTTCTTGTCAGGCCCAATAATCACAAACTAAGATTAAATCCAATAAATTCAAATTGACCAAATAATTAGAAGCAAATAACACCAAATAA	TGCAAGCTGATCTCTGCGTT	60.321	20	95	100	TTGGGCCTGACAAGAACCAA	59.74	20	95	100	200	340	539	GCAAGCTGATCTCTGCGTTC	59.627	20	95	100	TTGGGCCTGACAAGAACCAA	59.74	20	95	100	199	341	539	TGCAAGCTGATCTCTGCGTT	60.321	20	95	100	TGGGCCTGACAAGAACCAAT	59.518	20	95
nSSR_1340	GA	6|C6201444:390-801|+	6|C6222037:277-288|+	N/A	N/A	7|C6039775:282-295|-	6|C6340824:301-312|+	6|C7049868:563-574|+	6|C5733021:941-952|-	0.37	0.25	1	ATGTCACGGACATTTTTCTCTGATTCTCCAATGTACATATTAATCAATTCTGGCCCTTTAACACTCAGAAAATTCAATGAACACTCGGTGGCTACAGCTTTTGCCAGCAATGTCTGAAAATTTCAAAGAAAGGTAATGAGCATGTCTAACCATGGCTTCCTTTGTTGGCAAATGAAAAGGAAGAAGAAGAACAAGAAGAT	AAGAGCGAAAGGGATAAGGAGCCAGCCTAAGAATTATACCTTCCCTGTTCCAGGAGGACCATAGAGAAGAACACCTGAACGCTTCCGCAACCCTGACGAAAATAAATCCTTGTATAGGAGAGGTAACTGCAAAAAAGATATAAAAGCCCAGTCTGCTATTTCAACTAAATCTGAATAATCAATCCATTGAGGAAAAAAAA	TGAACACTCGGTGGCTACAG	59.683	20	100	100	TGGCTCCTTATCCCTTTCGC	59.82	20	100	97	159	277	435	CCATGGCTTCCTTTGTTGGC	60.037	20	100	100	TTTTCGTCAGGGTTGCGGAA	60.464	20	100	100	165	349	513	CACTCGGTGGCTACAGCTTT	60.321	20	99	100	TGGCTCCTTATCCCTTTCGC	59.82	20	100
nSSR_1344	GA	6|C6209326:198-609|+	6|C6184845:781-792|-	6|C5286910:729-740|+	N/A	N/A	7|C6140514:300-313|+	6|C6949936:266-277|-	6|C5445227:253-264|-	0.37	0.25	0.99	ACTTCCCTTAGAGTAGAGTTGCTATGAAATTGGATAATTAAAAAACTATTATTTATAAGATAATAATGAAAAAATTAATTTTTTTTATCAGGATTCCTTATAGTGAAATTCATACATTTTATGAATTTTATAAAATGACTATTTTAACTTCTATTTTTTTATATATTATTTTTTCCACTCAATTTTTCTTTCCTATGTGG	GTGGTCAAGAGGGAAAGCATTATGGGGTGTTTGGTTTGAACGAATGGAATGAGAATGATTCCTTACATAGGGTTAATCCTTTGTTTGGGTATGGAGGAATGGGAATGAGAGAGGAATGATAAGGAATCACAATATTCCCGGAGTAGAAGGAATGAAAATCCCTCCAAAATTGAGTGGAATGCATATTCCCGACTTCTGAA	Primers not available
nSSR_1348	GA	6|C6216128:395-806|+	6|C6098923:471-482|+	6|C4804213:181-192|+	N/A	8|C5816303:281-296|-	N/A	6|C7134802:1741-1752|+	N/A	0.8	0.38	0.98	GGGTAAGACCCCGGCAATCAAAAGCCCTGATAGAGAGATAGGGTTTCCTGTGAGAAATTCGGATCAATAACCGCAGAAATGGCCACCGATTCCAGCAGAGATTCTTTAGAACAAGCGCTGATGATCGGAGGAGTTGGGGTTAAGATTAGGGTTTCGAACCCGATCGGATCGGTACCAATTCTTAGTGGAAGAGAGAGGGG	TGAAGCGATAGAGAGAAGCTGATGAAAGCCAGAGAGAGAAGGGAGTGTTTTGGGGGTATTTATAGAGTGAGAGAGCATAACAGAGAAAAGAAGGAGAGACTTGGGAATATCGCACTTCTTTGGAAGTTTTTATACATTACCCCCTTAAAATGTTTCAAATTGTTTATAAAACCACCCATTTTTTAATGTTTCTGAAGTAC	GCAGAAATGGCCACCGATTC	59.899	20	100	100	ACTCCCTTCTCTCTCTGGCT	59.29	20	100	100	186	272	457	AACAAGCGCTGATGATCGGA	60.108	20	100	100	ACTCCCTTCTCTCTCTGGCT	59.29	20	100	100	149	309	457	GGTTTCGAACCCGATCGGAT	60.179	20	100	100	ACTCCCTTCTCTCTCTGGCT	59.29	20	100
nSSR_1355	GA	7|C5922365:53-466|+	7|C6240753:292-305|-	N/A	N/A	7|C6052369:1069-1082|+	10|C6371738:480-499|-	N/A	7|C5586847:307-320|-	1.2	0.38	0.97	ACATCTCCTCTCTTTCTCTGTGATCTGAGACCAAATCAAAACCAAAACATTTCAAGATCTAGACCTACGAAAATCCGAGCCGGAGAAACATTGGACAAAGAACAAGAAGCTGAAAAAACCTCGCCGCAGATGCCTCGCTCCCTCCTCCCTCTCGACTGGGATTCAAGATCGCACCAGCAACAGAGATTGGGACGAAGTGG	GGGTCTCCTCCTCTCCTCGTCTGCAACGCGAATGATAAAAAAGAGGGAAAGAGAAAAGTGGGTAAACGTGGAAGGGGTCATCTCGATATTTCGCGGAACCGGGGGCCATAGAAGAAGAAAGCCACCCTTTCCTTTCAGCGTATCCGATCCGATCCGATCCGATCAGGGTACGCGTCTCCAAACACCGAGTCTGAGAGACT	TCGCACCAGCAACAGAGATT	59.965	20	100	88.75	GACCCCTTCCACGTTTACCC	60.322	20	100	100	125	220	344	AAGATCGCACCAGCAACAGA	59.965	20	100	100	GACCCCTTCCACGTTTACCC	60.322	20	100	100	129	216	344	TCGCACCAGCAACAGAGATT	59.965	20	100	88.75	TGACCCCTTCCACGTTTACC	59.602	20	100
nSSR_1356	GA	7|C6047362:229-642|+	10|C6087854:269-288|-	N/A	11|C5345976:527-548|+	N/A	8|C6399964:2307-2322|+	N/A	7|C5653823:236-249|+	1.62	0.38	0.98	CACAACTTTTAGCCACTGTATCGCTAGACTCTTTTAATTTAAGCATCGGTTGACCAAGTCAATAACACACACAAAACAACAAAGGAGATGTGTGTGATCCTGGATTGTTGATAAAAAGGATAGCTGCGAGAGGCCCACCAACCCTTCATTCCCAAGCAAACTCCACTAGTGGAAAACTTTCATGTTCTTTGAATAAAAAG	TGTGAATCGGGGATTCTCTTTATTTTATTTCAATAGCGATCAGTAATAATAACAGGCAAGGGCACAACCACAGAGAACAAGCTGGCAGTCAGTTACCACGAATACCGAGTAAAGAAAGACAGACAGTGTTCTGCTTCAGCACCTGCAGATGTGTGTGGGGTGGGGGCATGGTGATGGTGGGACAAGAAGCGAAGAGGTGC	CCACCAACCCTTCATTCCCA	59.886	20	100	100	GTGGTAACTGACTGCCAGCT	59.965	20	98.75	100	179	334	512	CCACCAACCCTTCATTCCCA	59.886	20	100	100	TCTCTGTGGTTGTGCCCTTG	60.179	20	100	95	156	334	489	CCACCAACCCTTCATTCCCA	59.886	20	100	100	ACTGCCAGCTTGTTCTCTGT	59.528	20	100
nSSR_1357	GA	7|C6052044:301-714|+	12|C6157307:729-752|-	N/A	9|C5364552:741-758|-	11|C5950355:445-466|-	N/A	8|C7134898:484-499|+	N/A	1.85	0.38	1	GAAGTTTGAGCAGAGGAAGCAGCAGGAATGGCGGAAATGGGAGGGTGAGGCCCACTGTCCTGGGGTGCCGGTGCCCCCCATTTGGACTCTGCATCCGATGGCTCCACAACATGAACAGCTCCATCACTCATTCCTAGCGCTATCTGGTTGGGCTCTGACGGGTGTGCAGCAATCACTGAAGGATAAACGCTTCCGGAGCT	CAGAAGTGGTGTTTAGAGAGCTACCAGTATTTAAGGGGGTGGAAGATAAAAAGTAAAATTCACATACCTAGAAGAAACAGGAGATAAGTAGGCAGAAGGTGCAATTCTGCACCGAAGCCTCAGACTCTCTGCATCAAAGATCCCAACTGCACCATCACAGAAACCGGCGTACACCAACTGGCCATCACAAGAGTATATTG	CGCTATCTGGTTGGGCTCTG	60.532	20	100	100	TGAGGCTTCGGTGCAGAATT	59.963	20	100	100	199	337	535	TATCTGGTTGGGCTCTGACG	59.176	20	100	100	TGAGGCTTCGGTGCAGAATT	59.963	20	100	100	196	340	535	GCTATCTGGTTGGGCTCTGA	59.167	20	100	100	TGAGGCTTCGGTGCAGAATT	59.963	20	100
nSSR_1358	GA	7|C6112334:623-1036|+	6|C5801159:229-240|+	7|C5330234:757-770|+	N/A	N/A	7|C6378802:823-836|+	7|C7140934:455-468|+	N/A	0.4	0.38	0.98	AAGGGGCTAAAAGATGATATTAGGTGAAAACCTCTTTATAAAATGAGCAAATAAAAATTTCTGAAGGAGCTTAAGAGGGACAATTACATTAAAAGTGCATTAAATGAATCATTTGAGAAGATTAAAAATATTAATAAGTATTGGAATGGAGAGATACCATTATGCCCCTAGTTCATGATTTGAGACTATAAATAGAGTTG	ATGAAGAAGAAGAGAAAAAGAGAAGTTTTTAGGCACTGTAGCACTTCAGTGAAGAATGTAAAGAGAAATTGAAGATTAACAAGAATTGATTCAAATGGAAGGTATGAAAGTTTAGATTAGTGGTTTTAACCCTTTTCCCCCATGATTTAAGTTTCCATATTGAGTAGTTTGTAAGGAGTTAATCTAGGACTTGAGGATTG	TGCCCCTAGTTCATGATTTGAGA	59.477	23	98.92	100	ACTGAAGTGCTACAGTGCCT	58.948	20	98.75	92.5	102	362	463	ACCATTATGCCCCTAGTTCATGA	59.278	23	98.92	100	ACTGAAGTGCTACAGTGCCT	58.948	20	98.75	92.5	109	355	463	GCCCCTAGTTCATGATTTGAGAC	59.12	23	98.92	100	ACTGAAGTGCTACAGTGCCT	58.948	20	98.75
nSSR_1360	GA	7|C6126321:343-756|+	6|C6176837:471-482|+	7|C5341085:379-392|-	N/A	8|C5882946:557-572|+	6|C6387170:1133-1144|+	8|C6900046:268-283|+	8|C5353047:266-281|-	0.83	0.12	0.98	AACCAAGGGTTAATCAGAATAAAGACAATCATTAAAGGCTGAGATGGGCACACTCGTGGCATTGAGATAAGGGCGAGATGATCAAGATTTGAGGACTCGTGAGCTGGGATACCTGACTGCACCACAAGAATCACCACAAATAGGGAAACAATAATTCCTTTTGTGGCGAAACAAGTTTCCTGACGATCAAACCGATGACT	GTTCGCGTCAGAAACGCCATGTGGTGTGACACAACGCACGACAAAAATATGAAACATGTTTCTCTTTGATTTCGCCAAGCGGAACCGAGATCAACCGCTCATCTGAACCAAAACCCAGATCCGAGGAAAAATGGGATTCTTCTCCATCTTCTTCACCAGCTCTAACAGTTAATCTGAGAAGAAATCAATCATGCGTACAA	AGGACTCGTGAGCTGGGATA	59.741	20	100	100	GTTGTGTCACACCACATGGC	59.969	20	98.33	100	158	291	448	AGGACTCGTGAGCTGGGATA	59.741	20	100	100	CACACCACATGGCGTTTCTG	60.04	20	100	88.75	151	291	441	AGGACTCGTGAGCTGGGATA	59.741	20	100	100	GTCACACCACATGGCGTTTC	60.04	20	97.5
nSSR_1361	GA	7|C6147161:156-569|+	7|C6042406:331-344|-	N/A	7|C5375996:367-380|+	7|C6076277:2022-2035|-	9|C6064838:191-208|-	6|C6923890:434-445|+	N/A	0.9	0.25	0.99	GAAAGAGAAGAAGAAACATAACTAAAAGAGAGGGAAGCAATGAGGAAACTAGAACGAAAAAGGAGCATGCATGCATTCGTTATTATCTCTGTTTTGATTTTCAGTAAGAGAGAGGGAATATTTACATGCATTCTTTCACATGTTTTTATTTCAGTTCTCTTGGGTTTAATAACAATGACATAAGGAATGAGAAGGAGGAG	GTGAGAGAGAGAAGGTGAAGAGCGTGCAAGGCATGCATGACCATTTTCTAGCATGCATAAGTTATTAAATTGGTTTTGGTTCTTTAATATTATGATAAGTTGTTAATTAGTTGTGAAGTTTGATTTATAAAAAGATAAGTTGGGAGAGAAAAGACAAAAGGAAATCATGGACATGCATAAGTTTTTATTATTTTGTCACT	GATTTTCAGTAAGAGAGAGGGA	54.652	22	100	100	CTTGCACGCTCTTCACCTTC	59.485	20	99	100	149	250	398	GATTTTCAGTAAGAGAGAGGGA	54.652	22	100	100	CACGCTCTTCACCTTCTCTCT	59.456	21	100	100	145	250	394	GATTTTCAGTAAGAGAGAGGGA	54.652	22	100	100	TGCACGCTCTTCACCTTCT	59.252	19	98.94
nSSR_1363	GA	7|C6165223:800-1213|+	N/A	7|C5333595:523-536|-	7|C5389590:462-475|-	7|C6043939:1108-1121|+	6|C6342520:663-674|+	9|C6680773:203-220|+	10|C5636663:331-350|-	1.29	0.12	0.99	TTCTAAGAATAGAAAAAGGGTAACAAATCCTATAGAATGTCTTATACTATTTATAGCACAGGAAGCCCCCTCCAGGCATCAACAAAGCCTGTTCTGTTGTGTACTTTGCACCCAGAACCAGGAACCACCCTCCCATAATTCTTTCACTCCCCAACCTCTCCCCAACCCTTCCCATCTCCTTCTAGGTATACACTTTCATT	GCACCAAAAGAGATGAGAAGCCGGTCTTCTTCCAAGCATAGCTGCAGGAACATGGAGGTGGAGAGGCCAAAGACCAACGAGGAGCCTCAGCTCTCCGGCGCCTACATTAGAAGCCTTGTCAAGCAACTTAGCTCCTCAAGAACCAAAGAACTGATAAACCCCAAGTCCCCTAACACTGTGCTTGGAGATGAGCTCTCCCA	CAACCTCTCCCCAACCCTTC	59.962	20	100	85	TCGTTGGTCTTTGGCCTCTC	59.965	20	100	100	143	351	493	CAACCTCTCCCCAACCCTTC	59.962	20	100	85	CTCGTTGGTCTTTGGCCTCT	59.965	20	100	100	144	351	494	CAACCTCTCCCCAACCCTTC	59.962	20	100	85	AGGCTCCTCGTTGGTCTTTG	59.965	20	100
nSSR_1366	GA	7|C6173838:305-718|+	N/A	11|C5284938:826-847|-	8|C5355680:184-199|+	9|C5802625:280-297|-	8|C6338058:592-607|-	N/A	N/A	1.36	0.38	0.98	TCTTGTCGCATTTGTCAAAAAAAAAAAAAAAAACATAACATTTACTCACAACACAAAAGAATATCACTAACCATATGTAATTTTACATGCTTTTTTTCCTAAACATATAAAAGAAAAACCAATAAATTTGCACATGAATTGAATGCAAAGTATATGTGTGTATATTTATAAATAGTGTTTCAATTAAAGGCTAGGTAAAT	AGGCATGAAACATCTCAATCTCAAGTGATTTGAAGGAGTATATATGGATGCTCCCGCATGGCATGTGCCCCTTCAACCCTTGACAACAACCCGCACGAGCGCTTGCCGGCATCCAAAATCTCTCCCTCTCTCCCTTTACCTTTAGAAAAACCAAGAGCTAGAAGACAAGAGGCCATGAAAAAGGCTTCTTGTGCCCCTAC	Primers not available
nSSR_1368	GA	7|C6181474:474-887|+	8|C6165323:720-735|-	7|C5305042:721-734|+	6|C5394280:723-734|-	7|C6046109:703-716|+	N/A	N/A	6|C5751749:397-408|+	0.69	0.25	0.98	AGAGAGGAACTATCTTGGAGCCTCTATGGAGTTGAACTCTCTTTGAGATGATCTCTCTTGGGGCCTCTATGGTGTTGAATACTCTTGTAGATGATCTCCCTTGGAGCCTCCATGGAGTTGAACCCTCTTTGAGACGATCTCTCTTTGAGCCTCCATGGAGTTGATCGGCCTTGGAGACTTGCATGAATGAAAGGGAGAGG	TCATACCTTTATTGGAGCTCTTCTCTAGAGAGAGAAGGCCATGAATCTTGGGGAAGAAGTACTTCACAGAGAAAAGAAGAGCCTCATGCCCATGATTATGCTTGGATCTTCTCATGGCGACACGGCTTCTTGGTCGAGTCCCCACAGACGGCGCCAAACTGTTAGGGCAAAAATCGGTTTGGATCCCAATTTTACTCTAA	ATGGAGTTGATCGGCCTTGG	60.107	20	100	100	CCGTGTCGCCATGAGAAGAT	60.179	20	98	98	185	354	538	CCATGGAGTTGATCGGCCTT	60.107	20	100	100	CCGTGTCGCCATGAGAAGAT	60.179	20	98	98	187	352	538	TGATCGGCCTTGGAGACTTG	59.75	20	100	94	GTGGGGACTCGACCAAGAAG	60.037	20	97.94
nSSR_137	AAG	7|C6173666:64-484|+	4|C6183761:253-264|+	N/A	N/A	7|C6000227:264-284|-	3|C6382104:652-660|+	N/A	12|C5654539:657-692|+	3.14	0.38	0.98	CTTGAACATTTCTCATAATAAGTGGGTTACAAGATCGGTTGTAAATGCCTGAAACACACGCCAAAAAAATATTTCAAACATAAAGAATCAAAAAAGCTTGGTCTCGATATAGGAGATGCATTTTCAAGTAACTGGTCACGATGTAGAAAATGAAAAAGGCTTATTATTCAACTAACAAAAGAGGAAAAGAACTGAATTAA	AAAAAACATGATCTTTAATTGGTTAAACAATAGTTTCCAATGTACATTTCCAATTAGATCAAAAGAATTCGCTAAATTGCAGAATATCATCCAAGCAACTTGCAAAAAGCTGACTGGCCTTAAAAGTTAAAACTTGGACACAGACAAACAATCATAGAAATACATAACAGTTTCATAAACCCTAATCAATAAAATCATTA	TCAAGTAACTGGTCACGATGT	56.978	21	100	100	GTTGCTTGGATGATATTCTGCA	57.094	22	100	100	197	186	382	AGTAACTGGTCACGATGTAGA	55.857	21	100	100	TTGCAAGTTGCTTGGATGAT	56.204	20	100	100	200	189	388	ACTGGTCACGATGTAGAAAATG	56.46	22	100	100	TTTGCAAGTTGCTTGGATGA	56.435	20	100
nSSR_1371	GA	7|C6191264:136-549|+	7|C5923036:334-347|-	N/A	7|C5330512:296-309|+	7|C6023923:1070-1083|-	12|C6134460:234-257|+	9|C7072990:895-912|-	N/A	1.86	0.25	0.99	GCTCAATCTAAGAAGAGAGGAACAGATGGAAATCAACCTCAGAGTCCAGCGTGGACCAATGGGAGCTTCAGAAACCCTATCCAATCCAATATTCTAATCCTCCTCCATTATCAACCTCAATCCTTCTAACAATCTATCTACATTCCATATCCAACACACACAAACAACAGAAGAGAAGAGGAGGAACTCACTGAGGGAGT	TGGCATCAACTGCATGTTTCCTCCACCACCATGCCCCCACTGCCACCACCAAGACTCCGGTGCATCGCCTACTGCCAAACATCAAGTCATCACAGTTGGTGTGCAAGGCTCAGAAGCAGGAACCAGAAAACAATGCAATGGTTTCACGCCGGTTGGCACTCACTGTCCTCATCGGCACCGCCGCTGTTGGCTCCAAGGTC	GTGGACCAATGGGAGCTTCA	59.962	20	100	100	TGGTGGAGGAAACATGCAGT	59.522	20	100	100	192	185	376	GTGGACCAATGGGAGCTTCA	59.962	20	100	100	GGTGGTGGAGGAAACATGCA	60.539	20	100	100	194	185	378	GTGGACCAATGGGAGCTTCA	59.962	20	100	100	TGGTGGTGGAGGAAACATGC	60.539	20	100
nSSR_1373	GA	7|C6205642:1531-1944|+	7|C6243883:1221-1234|+	7|C5310016:1139-1152|-	7|C5394842:1333-1346|+	4|C6077269:315-322|+	N/A	N/A	N/A	1.2	0.38	0.99	GACCAAAACTTTCAACCCACGACTCCGATTCGAGCGTCCCTCGACCAGTTCTTCCGATCGAGACCGTACGATTGAAGATCAATGGTTAGATTGAAATCAGTGGGGCCCGTGGATTCAACGGTCTGGATGGGTTTTGGGGTCGGGTTCGCGGGTTCAACGCAGACTGTTCTTATCCATACCCGACCCGTCAAAGGTCGAAC	GCGCGCTAAGCTTCAATGGCGATCTCTCTCCTCTCCGCTTCGATCCCATCGAATCCATAAAAGCCAAGTTACATCGATCCTGGAGGAGCTCATTGCGAGAAGTCCTTCTTGCCATGCGACGCTGGATCGCGGCGATCCTCCAGAACGAGGAAACCCTAGATATTGGCAGAAATCCGAGGTGTTTTTGGTTCTTTGAATCG	CGTGGATTCAACGGTCTGGA	60.038	20	100	100	GATGGGATCGAAGCGGAGAG	60.039	20	100	100	157	307	463	CGTGGATTCAACGGTCTGGA	60.038	20	100	100	AGCTCCTCCAGGATCGATGT	60.106	20	100	100	197	307	503	CGTGGATTCAACGGTCTGGA	60.038	20	100	100	ATCGAAGCGGAGAGGAGAGA	59.818	20	100
nSSR_1374	GA	7|C6213480:57-470|+	N/A	7|C5169029:526-539|-	6|C5388994:1726-1737|-	7|C5935285:596-609|-	5|C6399958:822-831|-	N/A	N/A	0.8	0.38	0.97	GAAGAGAACTAGCCTCATAGAGATCTTCATACATGGAGGAGAAGAGAGTTGGCCATGGAACTTGAGCTTGGAGCTCTTATAAGAGAAAGACCATTGAGAGTTTCCTCTTGGAGAGATCATCCAGGTAGGTGGCATGAGAAAAGCCTTTAGATTTGGAGAGCTTCATCTGGGAGAGAGAAAGGCCATGGAGAGTTTCGTCT	AAGGCCCTGAGCTCTTGTGAAGAAAAAGGAGCTTTGTTGGTGAATATCCAGGAGCACCTTTGGCCGATTCGAGAGGCTTCGAGACATGGAGAGATCATCCCCCCGTAGTAACTTTGTTCAGTTAGAATAAACAAAGGCTGGTTAAAACATATCCTTAAAAGAGAACCACAGCCTCTCATTCATTCACTGAGGAATGAGTG	TCCAGGTAGGTGGCATGAGA	59.957	20	100	100	CTCTCGAATCGGCCAAAGGT	60.108	20	100	100	170	175	344	GGGAGAGAGAAAGGCCATGG	59.818	20	100	92.5	CTCTCGAATCGGCCAAAGGT	60.108	20	100	100	121	224	344	TCCAGGTAGGTGGCATGAGA	59.957	20	100	100	CCATGTCTCGAAGCCTCTCG	60.249	20	98.75
nSSR_1376	GA	7|C6217200:2567-2980|+	8|C6156689:822-837|+	N/A	N/A	7|C5870614:242-255|-	10|C6101566:372-391|+	N/A	10|C5374973:225-244|-	1.36	0.38	0.98	TCGCCAGATAGAAAGCCCTAGGGATCCAAACATCACAAGAATAGGCAAAATTTGGATCAAATTGATGGGTTTGAGCTCGCGATCAAGGAAGAAGATGGGATCGGCGATACCTGAGCGGAGAAAGCCTGGGATTTGCTCTCTCGATTTGGAGAACTAATCGCAATGATTGGATGGCTTTGGAGGTTGGGGCCCCGAAATAT	AGTGACGTGGCAGCGTTTGGATACACCGAGAACATTTGAAGGGGTGTGTGGGCTGTGCTCTAATACCGGATCCGATGGATTTGAAATGACGAGAATGCCCTTTATGGGAAACGTGAGCACACGCGCCCTTCCATTTTATTATTGATCGAGTTTTTTTGGCCGCACTAGTTTAACTTAATTATTAGTGCTTTTTTTTTTAT	GCGATACCTGAGCGGAGAAA	59.898	20	100	97.5	TTAGAGCACAGCCCACACAC	60.25	20	100	100	174	303	476	GATGGGATCGGCGATACCTG	60.109	20	98.75	100	TTAGAGCACAGCCCACACAC	60.25	20	100	100	184	293	476	TGGATGGCTTTGGAGGTTGG	60.252	20	100	100	TTAGAGCACAGCCCACACAC	60.25	20	100
nSSR_1379	GA	8|C5915981:9-424|+	9|C6097273:570-587|-	9|C5325008:227-244|+	8|C5385260:1559-1574|-	N/A	7|C6074282:204-217|+	N/A	8|C5415877:294-309|-	0.69	0.25	0.99	TAGTGGAAGGATTTAAATGAAAACAACCCAAGGGTCACATGAGATAATAGCTCTGACTAGAACTTAAAGATAGCCTGATCAATCCCAATACCTAGTTACCATCCACTTAGTTTCATGAGGGATTTCGGGCTAGACACGCCTCTGATTGTCAACCGAAAGTGGACAAGGTTGAAGGCATGGGGTGCTGACCGTGGACTTGG	GGACAGTGATACGGTATCCAAAGGTCTGATCTCCTTCATGGAATTGTTTAATTGTTAGGTAGATAAGGGAGAGTCTCCCAAGGTTGGATTTGTTTGAATTTTTATTGGAATAAAATTCCCTAATCACTCTTTAAGTAATTAGGAGATTTATTAGTTGATGAAATAAATTTCTCAAACTCGGATCTTGTGTGCAAAAAGGG	CGCCTCTGATTGTCAACCGA	60.39	20	99	100	GGAGATCAGACCTTTGGATACCG	60.244	23	100	100	114	144	257	GGCTAGACACGCCTCTGATT	59.538	20	99	100	GGAGATCAGACCTTTGGATACCG	60.244	23	100	100	123	135	257	CGCCTCTGATTGTCAACCGA	60.39	20	99	100	AGATCAGACCTTTGGATACCGT	58.624	22	100
nSSR_1384	GA	8|C6090358:124-539|+	N/A	8|C5257016:573-588|-	6|C5362828:212-223|+	6|C5876908:187-198|+	N/A	6|C7089640:756-767|-	N/A	0.98	0.38	0.98	ACCAAGGTTTAACAACATTTAGGATCATGCTAGATGGTCCATTAGCCAACACATAACAAATCCTCTATAACAGGTGGCTGAACAAGCATAAACACTCATAAATCCTCATACATCATAACCTCAAGCACCTTCTATATAATAAACATTACGGGTACCCAGGGGCTCTCTTAGGATCTCATGAACATTCAGCATGCAAGAGG	TGATGACAGGACTCACCTTCCTCTTCACAGCTTTCCTGGCCCTCGAACTCGTGGCACCTAGTTTCCTAAGTAGTTGGCCCCTCAAGCAACTCCCTCGTCAAATGTTGATGGGCTTGGTCATGGTTCCCTTGCACCGTCTTAAGGTTTGGCCACCAGGTTGGGTTGGTTTCATAGCAGCGTCGTGGCCACGTTACTCCATA	GGTACCCAGGGGCTCTCTTA	60.031	20	98.75	100	GCTTGAGGGGCCAACTACTT	59.962	20	100	100	153	273	425	GGTACCCAGGGGCTCTCTTA	60.031	20	98.75	100	AACTAGGTGCCACGAGTTCG	60.039	20	100	100	129	273	401	CCCAGGGGCTCTCTTAGGAT	60.105	20	100	93.75	GCTTGAGGGGCCAACTACTT	59.962	20	100
nSSR_1386	GA	8|C6111134:440-855|+	5|C6191389:697-706|+	8|C5049903:236-251|-	N/A	6|C5760293:204-215|-	N/A	7|C7076614:415-428|-	N/A	1.17	0.38	0.99	ACCAATCAAAACAATCCGAAACAACAGACTCTTAACTTTCAACCTAAAGATGATCCTCATGTTCGTTCTACCCCAGCAATAATCCCATGCATAAACGAACAACAACACAGTCACATTGCTTTCCTCACAAACCTCACAAACGAAACCAGATTGATCAAAGATCTAAACATACTATATTTCATGAAAACCTAGAAGAGATC	ACGGCGGGTTACCCTTGGGAGGGGCTTTGGATATGGCAGGCTCCTCCACGGGGCGGATCACGGTAGCCATGGCCGGAGCAGCAGCGGTCCGCTTCTGATCCACAGCCCAATCGTCACCGACAGGACGCAGCGGCTCCATCTTCACCTTGGCCGCAGCACCGACACCCGTACCCCGGTTGGCAGAGCAGCATGGCGTCGCT	CCCCAGCAATAATCCCATGC	59.029	20	100	92.5	GTGGAGGAGCCTGCCATATC	59.964	20	100	100	195	270	464	TGTTCGTTCTACCCCAGCAA	59.24	20	97.5	100	AGCCTGCCATATCCAAAGCC	60.469	20	100	100	199	259	457	CCCCAGCAATAATCCCATGC	59.029	20	100	92.5	AGCCTGCCATATCCAAAGCC	60.469	20	100
nSSR_1387	GA	8|C6115912:233-648|+	12|C6240095:366-389|-	N/A	N/A	N/A	10|C6324178:749-768|-	9|C6862552:233-250|-	9|C5699281:359-376|-	1.36	0.38	0.98	ATGATACCAATTGGAGACAAGTCTTTTAGTGTTTGATTGGAGAATGAGAGAGTTGTTTCCAAAATGAAAGGCACCATGCAATCATCTCACTGTTTTTTAAACCAGAAAGAAATGAAAGGAGATGCATTATTACAAGGTGTATGTTTGTGTATATATTATATATATATCTATATATAAAATAAAAGAAAGAAAGAAAGAGG	TTCATAACTTAAGGGTTGTGCAAAGGGGGATTCACTTTAGAAGGCAAAGGCACAATCTTCCCTAAGAAATATTAAAAGGGCATGCACTACTTTTCATGCTTGGTGATGAGATTTGAAAAAGAATCACTTTTGCCTGCTTTTGATTTCACAACCAAACATTCTCTCATCTTTGGAAAGCAGTGGGAGTAAAAAGACTAAAT	GCACCATGCAATCATCTCACT	58.978	21	100	100	CCCCTTTGCACAACCCTTAAG	59.382	21	100	100	174	270	443	CCAAAATGAAAGGCACCATGC	58.922	21	100	100	CCCCTTTGCACAACCCTTAAG	59.382	21	100	100	186	258	443	GCACCATGCAATCATCTCACT	58.978	21	100	100	CCCCTTTGCACAACCCTTAA	58.289	20	100
nSSR_1388	GA	8|C6131033:724-1139|+	N/A	8|C5314784:805-820|-	9|C5235696:322-339|-	N/A	8|C6388420:1038-1053|+	N/A	5|C5746261:229-238|-	1.36	0.38	0.98	AGACTAATCTATGCCACATGACCTACAACAAATATAATTGTTAGAATTTAGCACTTTTCTCATTAAAGTGATAGCTTTTGGCAAGGAATGAGTGTAGAGATAATACTCACTCCATGCTTTTGGTTTTGAGGCATGATGGTAGAGAAGGTGGAGAGGTAGGAGAGCTTTGCTTTATGGTTAAAGAGATGAAAAGAAAAAAG	AGAGAAGAGAAATGGAGCTAGGAAGGTGGGGGATCGATGGTCAAGTGTGGGAACAAGACAACAGGTCTCTAGGCTGTAAAAGGATGCAGTATAAGTATTGCAAGTTGGGAGAAGGTGTGATGCAAGACAAGCTCAACAATGGTGGGAATATTTTTCAAGAAGAAAAACATGGAATGATAGGGAAAGACAAAGGGGGGATT	GGTGGAGAGGTAGGAGAGCT	59.739	20	100	76.25	ACACCTTCTCCCAACTTGCA	59.449	20	100	100	188	346	533	AGGTGGAGAGGTAGGAGAGC	59.739	20	100	73.75	ACACCTTCTCCCAACTTGCA	59.449	20	100	100	189	345	533	GGTGGAGAGGTAGGAGAGCT	59.739	20	100	76.25	CCCCACCTTCCTAGCTCCAT	60.696	20	100
nSSR_1389	GA	8|C6135595:322-737|+	7|C6155239:656-669|-	7|C5041061:303-316|+	N/A	N/A	N/A	5|C7017626:191-200|+	8|C5566229:321-336|-	1.1	0.38	0.97	GATCAACAGCTAAGATCATATCATCTGAACGTAACGGTGAAGGGCCAAGATCACCTTTAGTGCCTCGAACTTACGTACTAGCACTGATCTTTTAATCTCAATCGTCCGTCACTTTTAATCCACTACTCTACATGGTTTGTGTGTAACTTTGCAATAACCCCCTCGCCTCTTTATCCCTTTACATGCAGCTCCCTCCCAGT	CAAATTTGCTATAAGTCCTTAGACTCTCTTAAATTACAGATTAGTCCTTGATGGCTCCAATTAACACTAATTAAGAGATTAAAAATTTTAATCCCTTTTTCCACCTAGGATCCAAGTTTGGGGATTCTCTTTCATCAACTAATTAATCACCTAATTACTTAAAGAGTAATTAGAGAATTTTATTCCAATAAAAGTTCAAG	CCCTTTACATGCAGCTCCCT	59.743	20	100	100	TGGAGCCATCAAGGACTAATCTG	59.865	23	100	100	101	374	474	CCCTTTACATGCAGCTCCCT	59.743	20	100	100	GGAGCCATCAAGGACTAATCTGT	59.864	23	100	100	100	374	473	CCCTTTACATGCAGCTCCCT	59.743	20	100	100	AATTGGAGCCATCAAGGACT	56.788	20	100
nSSR_139	AAG	7|C6206518:735-1155|+	7|C6211845:315-335|-	7|C5342183:2193-2213|-	N/A	6|C6084875:2150-2167|+	N/A	N/A	7|C5541565:323-343|-	0.4	0.38	1	ATTAATGCAATAGAGGAACTAAATTTTAATTTCAGAAGTATCGAGCATTTCATTAAGGAACTCACAAAGATTGCAATTCGGATAGCTGGCTCAAATCACCACTCAATGTACCTTTGATACCCATGGTTGATAGTTTCCTGAGAGAGTGAAATTTCAGATAAAAACAGTATAGATTTTGAAACTTAAATGATGGAAGAATA	AACACTCACAGAGAAACCACTCTTGAATTACTGCAAAACACTCCTTCCCATGGTGTACCACAAGGATCATCTGACTGCCCCCATGTTGGTGGTGTGTTCTGCCATTGATTCATCAGGGACCTGAGAGCATTGACTGCAAGTGTTTTTTAGAACAAAACATTCAGTATTTTTGCTATCCAAACAAGCCAGTTAATTACAAT	TGCAATTCGGATAGCTGGCT	59.819	20	100	100	TGGGAAGGAGTGTTTTGCAGT	60.064	21	100	100	200	271	470	AGCTGGCTCAAATCACCACT	59.597	20	100	100	TGGGAAGGAGTGTTTTGCAGT	60.064	21	100	100	188	283	470	AGCTGGCTCAAATCACCACT	59.597	20	100	100	GGTACACCATGGGAAGGAGTG	60.065	21	100
nSSR_1391	GA	8|C6137069:53-468|+	7|C6239903:1564-1577|-	9|C5299920:517-534|+	N/A	9|C6074789:950-967|-	4|C6371808:1073-1080|+	4|C6881638:364-371|-	8|C5573589:312-327|+	2	0.12	0.98	ACCATAGAAGCTGCCAGTGCACGCGAAACTTCTTCATCCTCTTCCCGTAAATGATCTGCAGGAACAGCCAGAAAAGAAGCCACTTGAATAACTTCTGTGAGCTATAAAGCCTACAGTTGGACCAGTAAAACTACTTCTAAAAATCTTTAGCTGACTGCAAATGTAGAATGGAGAAGTGTGTGTAGTGTGAGTGCGTGTGT	AAGAACACACAAATTTTCTAAATACAGTTCATGAGCATGTGCATAAAAGAAGTAGAAAAAAGCCACGTTAACAATTCAGAAGAAATAAGATGGCTTAGACTGTATTTTGTTTAACCTGCTTCTAAAAGAAAATAACAACAAAAAGAGATTGGTATCCCAAGCCAATAATGCTGTAGAACAAGTGTGTCCATACTCGTTCC	ACAGCCAGAAAAGAAGCCACT	60.134	21	100	98.41	TGCACATGCTCATGAACTGT	58.1	20	99.17	100	196	115	310	GGAACAGCCAGAAAAGAAGCC	59.729	21	100	100	TGCACATGCTCATGAACTGT	58.1	20	99.17	100	199	112	310	AAGCCTACAGTTGGACCAGT	58.565	20	100	100	TGCACATGCTCATGAACTGT	58.1	20	99.17
nSSR_1394	GA	8|C6190260:1280-1695|+	N/A	N/A	8|C5322112:457-472|+	8|C6065085:1030-1045|+	9|C6339908:885-902|+	10|C7085356:503-522|-	N/A	0.8	0.38	0.98	GCCGTGTGATGCAGTAGTATGCAGGGTTTAAAAAAAATACATAATATAAAAGGGTTCAGCAATGGAACTTTTCGTATTTTAACTTAAAGACAACTTTTGTTTGTGGAGAGAGGCGACCAAAACAAAAAAGAAAGGCGACGACGACAGAGAGGAGAGGCGACGACGAGGTAGTAGAGAGAATAATCGATCGTGACTTTGTG	CGAGCAGAAAAGGTAACTGGTACCGGCGCTGGCAAAGAAGACGTCGAATAAAGACACCGACGTCGATGAGAAAAGAGGCAGCGATAAGAGGTAAGGTTTTGATTTCCAACCTTTGTGTGGAAGAGAAACCAGATGAAGATCGTGTGAGAGGGAGATAAAGATCTGAGTGTAAAACCCTAAACTCTCCCCTATCAAAACAA	GGAGAGAGGCGACCAAAACA	59.965	20	100	100	CGCTGCCTCTTTTCTCATCG	59.351	20	100	96.25	195	304	498	TGGAGAGAGGCGACCAAAAC	59.965	20	100	100	CGCTGCCTCTTTTCTCATCG	59.351	20	100	96.25	196	303	498	GTGGAGAGAGGCGACCAAAA	59.965	20	100	100	CGCTGCCTCTTTTCTCATCG	59.351	20	100
nSSR_1395	GA	8|C6192900:180-595|+	8|C6241645:828-843|+	N/A	8|C5181504:239-254|-	8|C6035709:420-435|-	N/A	9|C6892448:416-433|+	N/A	0.4	0.38	1	GCCCAATCCTCTGATTGCATGAGAGCATTGGCATTGCCCACAACCTGGAAAAATAAAACATATACATTAGAGCCATCAACAGCAAAACACAAACAATAAAGAAAGGACTTCCTCACTACACTACATCAATCAAATCCCTAAGACAATTAAACTAGAAAATTGCATCCAGAACAGGATTTGTCCGTTTTATCAAAAAATTT	AAGAGAGAGACATACCCACAATGCCTTCTTTGCTCGAGTAAGAGCAACATTCATACGGCGAATGTCAGCAACAAACCCAACACCATGACTTGAGGCACGAACACAGGACATGATGATGACATCTCGTTCCTGACCCTGAAATGCATCTACAGTGTTGATGTAAATATCTTTTCCTTCCTCTGTGTCCAAAACTTCTTCAA	TCCAGAACAGGATTTGTCCGT	59.303	21	100	100	TGCTGACATTCGCCGTATGA	59.825	20	100	100	122	343	464	TCCAGAACAGGATTTGTCCGT	59.303	21	100	100	TGTGTTCGTGCCTCAAGTCA	59.823	20	100	100	157	343	499	TCCAGAACAGGATTTGTCCGT	59.303	21	100	100	TCCTGTGTTCGTGCCTCAAG	60.25	20	100
nSSR_1398	GA	8|C6200112:51-466|+	N/A	N/A	7|C5115837:351-364|+	9|C6046409:311-328|+	5|C6142384:263-272|-	6|C6636447:195-206|+	5|C5691135:376-385|+	1.49	0.25	0.97	TCGGGGCGTTACACTCAGAGAAGTGTTCAGTAGTTGCATGACCTGCGCGGAAGCTATTTATTTTGAAGGGTTTCAGGTGTTGCCACGTCTTTGTGTTGTTCCGTGAGTAACTTCTCTTCCTTCACCATTAAAGAGCAACTGAGGCTCGGCCTCACGATCTACTACTCATCTGTGAAGAAGCTTCTCTTTCCTCTTTACAT	CCTTGAAGCTCAGCCTCGAGAAGCACAACCGGGTGCAACTTCCTTCCCTTCTTCAAGCTCCGCTGCCGGGATTCGGGGTGGAAGACGAGAAGGTCCTACGGCTCTACTCGAGCCCACCACGATGAAGAAAGAATACAGAGAGATCGAGCTTGGTCTTTCTGTCTTGAGATGGAGGACACGTTGGTGGACGGCCGGAGTTC	GTTTCAGGTGTTGCCACGTC	59.971	20	100	100	TTGTGCTTCTCGAGGCTGAG	60.038	20	100	100	175	119	293	CAGGTGTTGCCACGTCTTTG	59.971	20	100	100	TTGTGCTTCTCGAGGCTGAG	60.038	20	100	100	171	123	293	AAGGGTTTCAGGTGTTGCCA	60.033	20	100	96	TTGTGCTTCTCGAGGCTGAG	60.038	20	100
nSSR_14	AAACA	5|C6206842:1098-1522|+	5|C6188257:472-496|-	5|C5161039:281-305|+	N/A	N/A	5|C6389796:1487-1511|-	N/A	6|C5739497:1020-1049|+	0.4	0.38	0.99	GAAACCCATCTTACCATCAGTCCAACAGACTAAGTTCTAAAATCAGAATACTCCCAGAACAATATCAATGAGTGGAATCAACACAAACACCCAAACAAAAAGCCAGATTTACTAGTCCCGTTCAAAAAGCTACCCGCATAACCCCCTAAAACTGCAACTTTGAACTCATTATAAGTATCTTCAGTCTACTATCTTGTCAG	AAATCAGAAATCAAATGACCATCAATTTCACAAATTTAAACCACCAAACAACCAGAACATTCAATCTCCAAAACATTAAAAAAAACGAGTAAAAATATAGGGATGACAAGCACACATTCGGCGAGCTTAAACCCCAATATCCCAAAACAAAACATGATTCAAAACCCTGCCATAAAAACGGGAAAATAAAAAAATAATAC	AAAAGCTACCCGCATAACCC	58.241	20	98.75	100	TGTTCTGGTTGTTTGGTGGT	57.776	20	100	100	160	324	483	AAAAGCTACCCGCATAACCC	58.241	20	98.75	100	TGTTCTGGTTGTTTGGTGGTT	58.469	21	100	100	160	324	483	AAAAGCTACCCGCATAACCC	58.241	20	98.75	100	ATGTTCTGGTTGTTTGGTGGT	58.254	21	100
nSSR_140	AAG	8|C6115018:120-543|+	N/A	8|C5210733:286-309|+	8|C5387684:693-716|-	N/A	9|C6348752:703-729|-	9|C7057682:754-780|-	9|C5524949:282-308|+	0.5	0.25	1	TCTCTCACACTTACGTACACTGATGGGGAAAACAAGAAGGTTTCTCTCCAAGATCATCAAGCCTGCTAAGCTCCCCATCTTCAACCACAAATCCAGAACCCATTCCTTTAGAAACACAGAAAAAGAAGAACAACAAGAAGAACTCAGAGAGATTTCCACTTCCAAATCCAAAGAAGCATGTTTTGTTGCAGATACCATTC	TGATGAGTGATGGGAAGAAATCAACAAGTTCATCAGTTTCTGAATATTTGTCATGCACTTCTTCTTCATGTTCACTCTCATCTGTTTCTGATTACTTCTCATGCTCCTCATTGCATGAACTCTTGAATGAAAATGAGGAATATTTACAAGAAGCAAGAGATCATCATGATCATACAGATCAGTACTACTCCACTTCACTA	CCACTTCCAAATCCAAAGAAGCA	59.678	23	100	93.04	TGCAATGAGGAGCATGAGAAGT	60.027	22	100	100	184	274	457	TCCACTTCCAAATCCAAAGAAGC	59.426	23	98.28	100	TGCAATGAGGAGCATGAGAAGT	60.027	22	100	100	185	273	457	GCTCCCCATCTTCAACCACA	59.962	20	98.75	100	GTTGATTTCTTCCCATCACTCA	56.344	22	100
nSSR_1402	GA	8|C6209774:1916-2331|+	10|C6197323:1040-1059|+	8|C5051605:352-367|+	N/A	N/A	N/A	9|C6897674:316-333|-	7|C5636251:437-450|+	1.02	0.38	0.98	CGAAGGACTACCTCTGATGGTCACTGATTTCAGGAAACGGATTTTGGACGAAGAAAAGTGATAGAAGTTTAATCTTGTATTATATGAAAAAAGACAACATCAAAGTATCATTGTTTGAATTTATTTATGTCTTCTATCGGTAGTCATGCCATCTCTAATTTCTTCAAACCCCTAGCAATGTTTTATCTCAAAGTTCATTT	TTCTTAGATTGTCTTTATTAGAATTATGTACACAATTTGGTTTTGATGACTGTTTTGATTAGAATTATGCATTAACAGGCAACTCTTTGAGGTTTGAACACCATTCTGGAGCTTTACTTCACCCACTTTATAATTAAAATGATTATCTTATAATTATACACATATCAGAGAAAATTGTGCTTAATTTCTGTTGTCTTTCT	TCGGTAGTCATGCCATCTCT	57.927	20	100	88.75	CAAACCTCAAAGAGTTGCCTGT	59.31	22	100	89.77	176	336	511	TCGGTAGTCATGCCATCTCT	57.927	20	100	88.75	ACCTCAAAGAGTTGCCTGTT	57.263	20	100	100	173	336	508	TCGGTAGTCATGCCATCTCT	57.927	20	100	88.75	AACCTCAAAGAGTTGCCTGT	57.263	20	100
nSSR_1405	GA	9|C6074012:255-672|+	N/A	9|C5112919:411-428|-	N/A	12|C5938833:456-479|+	9|C6260252:493-510|-	N/A	12|C5679803:503-526|+	1.47	0.38	0.98	GACGGGGCGCGAGCGGAGTTGCGATCCAGGGCGACGTCGGGTCGTGCGCACAGGCGCGCGTCTGCAGATCCGCAGGGGAGAAGGGTAGCTGGACCGCGGGTGCTGGCTCGAGGGGTCTCGCCGGAGCTTCACCGGCCATCTCCGACCAGGATCTCAACGGTAGAGGAGAGGAATGTGGTGACGGCTGTCGTGAAGCTCGT	GTGAGTGAAATAAGAGGAACTTTAGTTTTTCAATTTCTCATCTAACCCTAACTCACTCTACTTATATCCATGTTATATCACAATAGGTTATCATTCCCTCTCATCACTTTAGTCACGGGCGAATCCTTTACCCCGACAAGATCCATTTCCTTCGGATCTAAATACTATTCCCCGATAATGGATGTCCTTTACCTATATTA	AGGAGAGGAATGTGGTGACG	59.102	20	100	67.5	GGTAAAGGATTCGCCCGTGA	60.108	20	98.75	100	187	363	549	AGGAGAGGAATGTGGTGACG	59.102	20	100	67.5	TGTCGGGGTAAAGGATTCGC	60.108	20	98.75	100	193	363	555	GAGGAGAGGAATGTGGTGACG	60.135	21	100	64.29	GGTAAAGGATTCGCCCGTGA	60.108	20	98.75
nSSR_1408	GA	9|C6143513:614-1031|+	N/A	N/A	7|C5208216:228-241|-	7|C5805877:210-223|+	N/A	6|C6792111:262-273|+	6|C5599415:302-313|-	1.1	0.38	0.97	GTGAGAACACGGGTCCTTCCTCGTCAACTCGTTTAACACACGGTATAAACATTATATCAAATTAAGAACAAGACGCCAGCAGCCACGCACACACTTTGTCTTATCCTGTTCACATGTCTGCATTTAACTTTAAATTATTATATATATAATGAACAGTGATTATATATATGCTTGATTAGAAAATGCATGTGAGATCGATG	AGTTGGTGGTGGTGGAGTACTGAGATCTTAATTTGTCCATAGAGAGAGAAGAAGTTCATGTTCTATTGTTATTGTTGAATATTATTAATTAATTATTATTTGATCAATGAATTGAGAATGAAATGCTATATAATTAAGGCCACAGCTCCAATGAGAATCTAGATCATGAGATAGTGGCGGTGGGTGGCTGGTCGGTCAGG	CCACGCACACACTTTGTCTT	59.267	20	97.5	91.25	TCAGTACTCCACCACCACCA	60.105	20	100	100	159	282	440	GCCACGCACACACTTTGTC	60.298	19	97.35	89.47	TCAGTACTCCACCACCACCA	60.105	20	100	100	160	281	440	CAGCCACGCACACACTTTG	60.299	19	100	100	TCAGTACTCCACCACCACCA	60.105	20	100
nSSR_1410	GA	9|C6192530:1117-1534|+	N/A	N/A	9|C5346676:965-982|-	9|C6068743:495-512|+	N/A	8|C6991050:445-460|-	10|C5652719:607-626|+	0.63	0.38	0.98	TCCAAAAGTGGATAATGACTCATATTCAAACTAGGGTTTAAATCATAGTCTAATCATGATTAGAGATATGATTGGTTTAGAGATAGATATTTAAGTTCTATTCATATCAAAATAAGAGTTATCTTTGGAGTGATATAAATAGGGCTTACTCTATTCAATTGTTATAACAAGAGAGAAAAAGGAAGTAAGTTCTCCTTCTT	GTTAGGTTTTTCTCTGAGTGATCACTATATCTGGTATTCTTCAGTGAAATCAATAAATCTGGTGTGGTTCCCGAGGATGTAGGCAAATTACTGAACCTCGTTAAATCTTGTTCTTATGATTGCTTGAGATTTTTTTTTCTTCTCCTCTGCGTGGTTTGATCCTAACATGGAATCTGCTGCAAAATTATCCACCACAACTA	AGGAAGTAAGTTCTCCTTCTTG	55.125	22	97.75	100	TTGCCTACATCCTCGGGAAC	59.46	20	100	100	125	379	503	AGGAAGTAAGTTCTCCTTCTTG	55.125	22	97.75	100	TCAAACCACGCAGAGGAGAA	59.244	20	100	100	198	379	576	AGGAAGTAAGTTCTCCTTCTTG	55.125	22	97.75	100	ATCAAACCACGCAGAGGAGA	59.023	20	100
nSSR_1412	GA	9|C6208778:548-965|+	N/A	8|C5330240:867-882|+	11|C5311456:365-386|-	8|C5999561:815-830|-	N/A	10|C7124954:1352-1371|-	N/A	1.17	0.38	0.98	GTCCATTGATATCTAAATGGCTTTGCATGTATGCGTGCTCGTGACTCCCCCCCTCTGTGGTGGTGGAGTGATGTATTATTAAAGGGTACAAACAGATGGCCTTCCGAGCTTTTCTCTATTCCTTTTGACCATCTACGAGAAAGCAACAAACAATAACTAGTGAAAAGAAGAGATATATAAGATATAGATAGAGGACTCAG	CTTTGAATGGGTGAACATCACTGTCTTCAAGACATACAACAGGTAATAGGTGTTGCAGGTTAAGAGAATTGGAGATGTGCAAAATGAGCAATTTAAATTATCTTAATTCACATGCACTTCTCATATATAAAATAATAAATAAATAAACAATGAATATTGGATATTTAGAATAGAAATTAAAGAGTTGGATAAATCCACAG	GGCCTTCCGAGCTTTTCTCT	60.036	20	100	100	ACCTGCAACACCTATTACCTGT	59.357	22	100	100	181	297	477	TGGCCTTCCGAGCTTTTCTC	60.322	20	100	100	ACCTGCAACACCTATTACCTGT	59.357	22	100	100	182	296	477	ATGGCCTTCCGAGCTTTTCT	59.67	20	100	100	ACCTGCAACACCTATTACCTGT	59.357	22	100
nSSR_1414	GA	9|C6222826:3868-4285|+	8|C6236559:838-853|+	8|C5323670:684-699|+	8|C5327474:438-453|+	N/A	8|C6153340:282-297|+	8|C7080554:536-551|+	8|C5640159:329-344|+	0.35	0.12	1	AGCACAAGCCACTCGATGTTAACGGGTCTCATCACGCACCAAAGATGAACCCTGGCAAAGCAGCTGCTACAACTATGAGATCAGAGTGTTCAGAGGGCGCCGGCAGTAGGATTCCACTTGGTTTCTTCGCCGGAGATAAGATCAATGAGACGCTAGCCAAGAGAGAAAGAGAGAGAAGTATACTCAACAGCCAACGGGTT	GTAAAACCAGTGGGTGTTGTGAAGAGGGCCTGGTTTCGAGATTTATAATGGGTGGTTTTGAACCGAGATGGTTCAGACCGGTTCGGTTCAATGGGTTTGCAGATAAACGTGTTTACCTCTTCTCTAGTTGCCACGTGTCACTCAAGCATCGTCCGGCTCACGTTGAAAGTTCATCTAAAGCCACATTCAACTCATTTTAC	CTTGGTTTCTTCGCCGGAGA	60.32	20	100	100	GAAACCAGGCCCTCTTCACA	59.89	20	100	100	139	316	454	TTGGTTTCTTCGCCGGAGAT	59.676	20	100	100	GAAACCAGGCCCTCTTCACA	59.89	20	100	100	138	317	454	CTTGGTTTCTTCGCCGGAGA	60.32	20	100	100	AACCAGGCCCTCTTCACAAC	60.179	20	100
nSSR_1417	GAA	5|C6031862:112-526|+	5|C5951020:312-326|+	5|C5225337:589-603|+	N/A	5|C5852094:414-428|-	N/A	N/A	4|C5728291:1119-1130|+	0.4	0.38	0.99	CTTCCAATTGAAATCTCTATCAAGCAATTATGAAAACAGGACCTAGAAAATTTAATGCAAACCTAGAAAATTCAATCAGAACCGACGCGAACATGAAAGGCAAAAAACCAAAACCAAAACTTACACGAAAGAAACGTTTGGGTAACAAGAAACGAAGTACCTCCATTCTCAGAAAGGGGTAGAACCCGTTCAGCTTCTCC	CTAAAGCAACAAGAAAAGGACGACGGAGAGGATGAGGTAGTGGAGATGGGGCAGCACAAGCGAGAGGAGGAAGAGGTGGTGGTGGAGGGCACGAGCAGAGCGGGAGCAGTGCGGAAGCAGCGGAGAGTATACGCGACAGTGGCCATTTCTAGTTTATTCTCGATCGCTGGTGCCACCGCCTCTTTTCTTGAAAGCTGCGG	TCAATCAGAACCGACGCGAA	60.039	20	100	100	TCATCCTCTCCGTCGTCCTT	60.034	20	100	100	179	182	360	CAATCAGAACCGACGCGAAC	59.907	20	98.75	100	TCATCCTCTCCGTCGTCCTT	60.034	20	100	100	178	183	360	ATCAGAACCGACGCGAACAT	60.109	20	98.75	100	TCATCCTCTCCGTCGTCCTT	60.034	20	100
nSSR_1418	GAA	5|C6089032:487-901|+	N/A	5|C5000048:315-329|+	5|C4999126:250-264|+	5|C5715403:315-329|+	4|C6204420:268-279|-	N/A	N/A	0.4	0.38	0.98	GGAATCTCTGGGAGAGCCAATAGGCGAGTCAGGCGCTTTTGCACAACATCGTGGAGGAATCCAAATAGAGAAGGGTCTCCTCTCCGGCTTTCCGACTTCCACCCCTTCAAGAGCACCGCCCGATTAACTGGCTGCGACCACAAGATATCGATCTCCATTGATCTCCACACCAGCGACGAGAGGGTCTCGAGCTCGAAGTT	GGATCGAAAAGAGCCACCGCCGCCGCACGATAGAAGCGTTGAGAAGTCCAGCAATCGAATGCTAAGTGGTGGTGATGTGAAGACTATCTAAGGACGAGATCCCCCTTCGCCTTCGCTCTCTTTTTGATCTCAAAATTAAGGCACAAAACATAGTCAGGAGAACATAATCCAAAGCAAGAATCGAAGATGATGGTCTTGAT	ATTAACTGGCTGCGACCACA	59.964	20	97.35	97.5	TGCTGGACTTCTCAACGCTT	59.893	20	100	100	146	322	467	ATTAACTGGCTGCGACCACA	59.964	20	97.35	97.5	TTGCTGGACTTCTCAACGCT	59.893	20	100	100	147	322	468	CTGGCTGCGACCACAAGATA	60.108	20	97.2	95	TGCTGGACTTCTCAACGCTT	59.893	20	100
nSSR_142	AAG	8|C6160361:950-1373|+	N/A	N/A	8|C5395428:360-383|+	4|C5671617:294-305|+	6|C6271190:604-621|+	6|C6874182:227-244|-	N/A	1.5	0.38	0.99	CATAAGACTTCTATGTTCCATCCATGAGTTTATCACAAGGAAGGCCATGTTCCTCTTTTGCAATGTCATCCTACTCTTCCTTGCCAAGGACTCTTGCAAATTCAGCTCTAGTCCTGTGTACTCCAAGGTTGATATCTATGAAGACTTCCTTATCAAGAGAGAAGACCTTCTCAAGTCTTCCATCTGCTCTTCAGTGGTTC	AATATGAAGATGCAATGGAGAATGAAGAACAAGAAGGAATGGGCGATGTTGTTGCATTTTTAGATCATGAAAATGATATTAGGGAAGCAGAAGAATTCAACAGAAGGTGTGATGAATTCATAGAGAAAACAAAGAGAGATAGAAGATTAGAGGCTTTGCAGCTTGTGCTTTCATGAATGGATCTTCTAGTTTTCTTTCCT	CTTGCCAAGGACTCTTGCAA	58.679	20	100	100	GCAACAACATCGCCCATTCC	60.458	20	100	100	200	279	478	TCCATCTGCTCTTCAGTGGT	58.351	20	100	80	TGCAACAACATCGCCCATTC	59.757	20	100	100	102	378	479	TTGCCAAGGACTCTTGCAAA	58.226	20	100	100	TGCAACAACATCGCCCATTC	59.757	20	100
nSSR_1421	GAA	5|C6178608:795-1209|+	5|C6243363:517-531|+	N/A	5|C5140039:245-259|+	5|C5928365:667-681|-	N/A	N/A	4|C5694407:826-837|+	0.4	0.38	0.98	CTCAAAGACTTGTTCAGCAATGAGGGCACCAGTACCATCAGCCCTTATGATCTCCAGGTGTGCCTTTTGGTAATGTCCAGTTCCCCTCAATGCGTCCGCGATGAAATCATCAAATCCAATGGCTATAGCTGCCTCTGCCTTCGCTCCATACACCAACCTCTGTGCATGCATCAGATGAAGTGAAAATATTGTCACCAAAG	GCATCATTGGTTTCCTGTCGGTTCAGTTGGATACAAATGAAATTGACAACTAGCCAGGACATCATCACTCACCTTGATTCGAGAAAGAAAGATCGCTCCGAAGCACATCGGGCAAGGTTCACAGGAAGCATACATCTCGCAATCAGAGAGTTCAATCTTCCCAAGTTTCTTGCATGCCTGAGCCATGAAAAAGAGAGCAA	ACCAACCTCTGTGCATGCAT	60.251	20	97.35	97.5	CTGTGAACCTTGCCCGATGT	60.606	20	100	100	188	351	538	CAATGCGTCCGCGATGAAAT	59.972	20	100	100	ACTGAACCGACAGGAAACCA	59.165	20	97.5	100	155	287	441	TGTCCAGTTCCCCTCAATGC	59.962	20	100	100	ACTGAACCGACAGGAAACCA	59.165	20	97.5
nSSR_1429	GAA	6|C6061020:270-687|+	N/A	N/A	N/A	6|C6072765:1571-1588|-	5|C6388390:551-565|+	5|C7086456:458-472|+	5|C5576079:338-352|-	0.49	0.38	0.99	TGAAAAAGCAAAAGCTTCAAGGGCCATACCATTCACATGAGAGAGAGATCAAGAGAGAAGTAGAGCTTCCAAGTATACACATACAGATCATAGCTAGAGAAGGAGCTAGCTGTTGTGGATGTTCTCATGTTCAAGTGAAGCTAGGCATTAGTGTTTTTCAACTGATCAATTACTTACTTGTTGAAGAGTGGGTGGGTTGT	GAGGAAAGTGACCATCATCATCAGTGAGCTGAAAAGTTGATGTTTCTTTTCAGTGGAGAGTGAGATTCCAGACCTCTACTACTATACTCATATACAACCTGGCCTTTCCTTTTTCCCTTGTTGCTTTTCATCTTGGGACTCTCAAGAACTTAAAGAAAGGATCATGATGGACTCTTCTTCAAACTCTGATCATCAGCTCC	TGAAGAGTGGGTGGGTTGTG	59.817	20	100	100	AGGTCTGGAATCTCACTCTCCA	59.956	22	100	100	112	381	492	TGAAGAGTGGGTGGGTTGTG	59.817	20	100	100	GGTCTGGAATCTCACTCTCCAC	59.833	22	100	100	111	381	491	TGAAGAGTGGGTGGGTTGTG	59.817	20	100	100	AAAAGGAAAGGCCAGGTTGT	57.825	20	100
nSSR_143	AAG	8|C6181092:611-1034|+	11|C5906042:188-220|-	8|C5273076:190-213|-	8|C5339244:337-360|-	N/A	8|C6331770:764-787|+	N/A	N/A	1.2	0.38	0.99	TACAGATATCTTCACCTAGAAAAAAACACACATCTACAAACCAAGCAAAAGTAGAATCCAAATCAATCATAACTACAGAAAGAAACCCAAATTCTTTCTTCATAATAACAATATTGTTCTTTTTTATAAATCATAATCACAATATTGTAATTTGACACCAGTAGTATGAAAGGCAAACAGATATTACTTGAAAATAAAGC	ATAGGGTGAAAAGATAAGAAAAAGCTGGAGCAAATCCTATTTCTAAGACCAATCAGGAAACAAGCGCTTACACACACACAAACAGAATGTGATCCCAAGCACCAAAAATTTAGAACTTTATGCTACAACTAACATCAGCTTAGAGAAGAGTAACTTCAAAATTAAACCCAAAATGGCAAAAAAAAAGGAGGAAAACAAGA	TGACACCAGTAGTATGAAAGGCA	59.419	23	98.92	100	GCGCTTGTTTCCTGATTGGT	59.402	20	100	100	139	352	490	TGACACCAGTAGTATGAAAGGCA	59.419	23	98.92	100	TGTGTGTGTGTAAGCGCTTG	59.345	20	100	100	152	352	503	TGACACCAGTAGTATGAAAGGCA	59.419	23	98.92	100	GTGTGTGTGTAAGCGCTTGT	59.344	20	100
nSSR_1430	GAA	6|C6071072:321-738|+	5|C6098093:398-412|-	6|C5313646:1165-1182|-	5|C5252740:554-568|-	6|C5990263:539-556|+	N/A	N/A	N/A	0.49	0.38	0.99	TCGAGGCGGACGTGGCCGAGGTTGGGAATTTAGACTACCTCTTTGAGGACATCCCTGATGGTGCTGGTGGTCTGGATCCTTTTGAAGGCCCCGAGGTCCCCGTCTTGTCGGGGGTTGCCGCTGCCCGTCCTCACCGCAGGTCTCCATCTGGAGGCGGCCTCTGACGCTGATCCCTCGGGGAGAAGAAAGGAGAAAAAGAG	GGGGATGGTGATACGAGCCACTCCCGAAAGAAGGCACGCAGATCTTCTTCCTTGTCTAGCGGGGCGCGCCTTTCACCCCGCATGGCAACTGGGGAAGAGGGGGAGGCTTCACACCTTTCAGGGTCGTCCAAGGCTCTCCTTTCAGTGTCCCCCCGATGCGCCTTCTGTGCTTTTGAGACGGTGCGGTCCCCGTCTTACGA	GCTGGTGGTCTGGATCCTTT	59.67	20	100	100	GTGGCTCGTATCACCATCCC	60.25	20	100	95	177	262	438	GCTGGTGGTCTGGATCCTTT	59.67	20	100	100	GATCTGCGTGCCTTCTTTCG	59.628	20	98.75	100	200	262	461	GGACATCCCTGATGGTGCTG	60.465	20	100	100	GTGGCTCGTATCACCATCCC	60.25	20	100
nSSR_1431	GAA	6|C6215628:2400-2817|+	7|C6242815:974-994|+	6|C5179561:461-478|+	6|C5296752:369-386|+	N/A	6|C6360264:984-1001|+	6|C6923684:463-480|+	N/A	0.37	0.25	0.99	GAGGAGGTTGAGCTCCAATGGCAGACGGAGTTCTTGGGCTTGCTCAGCGCGCCGAAGACCACCAAGAAGAAGCCCCGGGAGAGGTCGAGGTTGCTCGGAGATACGGACAGCATGGATTGGTGCGTCAAGGCGAGAAGAGTTGCTTTGCGAGCTATTGAATCCAAGGGTTTGACTCATTCTGCGGAGAAGTTGGTCGCGTC	GAGCAAAAAGAAGAGTGATTTTAAGCTCAAGAAGGGTAAGAAAGATGAGATTTTGGGAGATTCAGAGGATGAGTTTGAGGATATTGAGGATTTGGAGAAGTTGGACTTGGAGTTTGATGGTGATGAGCTGAAACATAGGGTGAGCTCGTTTGCAGATGGGATGTTTGTTGAAAAGAAAGAGATGAATAGACAAGCGTTTA	TCATTCTGCGGAGAAGTTGGT	59.652	21	100	100	CTGCAAACGAGCTCACCCTA	60.037	20	100	99	200	373	572	CATTCTGCGGAGAAGTTGGTC	59.266	21	100	100	CTGCAAACGAGCTCACCCTA	60.037	20	100	99	199	374	572	CATTCTGCGGAGAAGTTGGT	58.186	20	100	100	CTGCAAACGAGCTCACCCTA	60.037	20	100
nSSR_1432	GAA	6|C6216950:968-1385|+	5|C6240719:1031-1045|-	6|C5332044:1409-1426|-	5|C5287338:677-691|+	6|C6049399:1355-1372|-	5|C6378160:546-560|-	N/A	N/A	0.5	0.25	1	AGTGGAAGTGGAGTGGCTGTTAGCAGTGGGAGTCCCTCAATCTCTCAGCGCACACGGTCTCAGTTCCGCTCAGCGAAGCCCATCAGGAGGAAGAAGAAGCTTGGGACTATTGGTGATCCCTATGACATTGATGTGAATGAGTTGGAGTCCAATGACAAATCAGAGTCATCTTCCTCTGATGAGGAGGTTGAAAGAAAAAG	TATACCTGGTGATAGAATGGATGTGGATGGCATAGAGGAAGGAATCAGCCTGAAGAGGTTAGGGAAGTTGATTGAAAAGAAGGGTATTCAGGCGGTTAAAGACGGTGCTCTTTACAAACTCCTTGTGGATACTATTCAGAATGATGAGCAGGAACTCCCGGCGGAATTTCTTTATAAACAGGGGAGCTCTGATGAGAGAC	CGAAGCCCATCAGGAGGAAG	60.179	20	100	100	CCTCTATGCCATCCACATCCA	59.299	21	100	100	183	273	455	CGAAGCCCATCAGGAGGAAG	60.179	20	100	100	CCTTCCTCTATGCCATCCACA	59.229	21	100	100	187	273	459	CGAAGCCCATCAGGAGGAAG	60.179	20	100	100	TCCTCTATGCCATCCACATCC	59.019	21	100
nSSR_1433	GAA	7|C5954095:126-546|+	8|C5990494:363-386|+	N/A	7|C5339748:298-318|+	7|C5930241:581-601|+	4|C6284974:324-335|-	N/A	N/A	1.36	0.38	0.97	GCGACACGGTTAAGGGATTGGCGGTGTTGATGGCGGCCGCGACGGTGGAGGGGGCTTCCGACGAGAAGCGGCGCCATGGAGGCCGACGGAGAGGTCGGAGGAGAAGGAGACGAAGCATATTCTAGGGTTTCGGATTTCTATATCGATTTCGAGAGCACGCGATCTTCCCGCAAATTGCGCCTCTTGTTTGGCTCGGAGAC	GAGAAAACCGTCTCTGAATTCATTTCCGACTCATATTTATACACGGACCCACTAAAATAGGGTTATTACGTACAGATCCATACTTTAAATATTTACATAAAACCCCTTATATATATTTTTTAAAATTTTACTGTAGATAATAATAAAACTCATAATATTTTCTAAGGGAAATTTCATTAGTTTAATCCATAAGCATGTTG	AGGTCGGAGGAGAAGGAGAC	60.034	20	100	100	CCCTATTTTAGTGGGTCCGTGT	59.762	22	100	100	192	216	407	ATTTCGAGAGCACGCGATCT	59.899	20	100	100	CCCTATTTTAGTGGGTCCGTGT	59.762	22	100	100	138	270	407	TTTCGAGAGCACGCGATCTT	60.109	20	100	100	CCCTATTTTAGTGGGTCCGTGT	59.762	22	100
nSSR_1435	GAA	7|C6201826:524-944|+	7|C6188957:219-239|+	7|C5192363:555-575|+	N/A	7|C5921419:555-575|+	N/A	5|C7073636:741-755|+	N/A	0.8	0.38	0.99	ATATTAGAGTGAAAATAAATGAAGTAAAAGAAAGTCTTTTATAATGAAATTTTAACTGAAAATTAAAATTAAATAAACTTTGGAAAAATAATCAGGGGCTTTATGATTAAAGTCGGCAGGCAAACTAACGTCTTTGCATCAATCTGTTATGTTGCCTCGTGATAGGCACTCTAGTTAGATTATCATCACCCGAAAAGAAG	GCAGCACCTCCTCATTTCTAGATCTAAGCTCAATCGATGCTTCTCCGATCTCCAAACCCTAGATCCCATCTCCGATCGAAACCCTAGCTTCCGATAGAATTCCATGGCGTGCCTGGCCCTCGCCCTCCAGCCTGCCAATGGCGCCAACATCCTCCTCCAGACACGCGAGTGGTTCCCTCCAGCCCGCGCCCTCGCTGCCC	TCGGCAGGCAAACTAACGTC	60.947	20	100	100	GGGTTTCGATCGGAGATGGG	60.25	20	100	100	193	312	504	CGGCAGGCAAACTAACGTCT	60.949	20	100	100	GGGTTTCGATCGGAGATGGG	60.25	20	100	100	192	313	504	AGTCGGCAGGCAAACTAACG	60.949	20	100	100	GGGTTTCGATCGGAGATGGG	60.25	20	100
nSSR_1436	GAA	7|C6202880:1485-1905|+	8|C6238017:756-779|-	N/A	7|C5365488:255-275|+	7|C6019229:499-519|-	7|C6399162:588-608|+	N/A	N/A	0.4	0.38	1	GTAGCGAACGGGACAGAGACCGAAGGCGCGATCGAGATCGCGATCGAGACCGAGACCGAGACCATCATCGACGAGATAGAGACAGGGATAAAGATAGAGATAGAGATAGAGACAGAGACAAGTATAGAGATAGAGATCGGGATAGAGAAAGAGATCGGGATGGGGATTATAGGCATAGGAGTTCGAGGGCTTATGATGAT	GATGGGAGAAATGCTGCCCCTAACCATAGCCGGAGAATTGGGGATGAGCCGGAACTCTATCAGGTTTACAAGGGGAGGGTCTCGCGGGTAATGGATACTGGATGCTTTGTTCAGCTGAGTGATTTCAGGGGAAAAGAAGGGCTTGTTCATGTTTCTCAAATGGCAAGTCGGAGAGTTGCAAATGCCAAGGATGTTGTGAA	CCGAGACCATCATCGACGAG	60.041	20	100	100	GCTATGGTTAGGGGCAGCAT	59.889	20	100	100	196	255	450	GCATAGGAGTTCGAGGGCTT	59.534	20	100	100	TTCCGGCTCATCCCCAATTC	60.107	20	100	100	103	372	474	CCGAGACCATCATCGACGAG	60.041	20	100	100	TGGTTAGGGGCAGCATTTCT	59.296	20	100
nSSR_1437	GAA	7|C6212380:1604-2024|+	7|C6240165:358-378|+	11|C5244589:679-711|-	N/A	6|C6059665:548-565|-	N/A	7|C7026230:296-316|+	N/A	1.74	0.38	0.99	AAATATCAAACCAGAATTTGGAGACAGTAATTGCAAAGCGTAGCCCGAAAAATAATCAAAAATTCGTGTTTTATCTTCATAGTCATTTTCCTATATTTCTAGCCATCAATAAGCAGACTTTGCATATGAGCTTTGTTGTTTTAATGCATCAATGTAGTAGCTTTTGGTATCAAAATCTATTGAGTGTTGTGAGATGTTTG	TGATGTCATTGTAAATTTTGTTGGGAAAGCATTTGGTTGTATCCCAAAGTTAGGCCAATATTTATAGCTCCCCTTAGATGTTCGATGAAATTTTTAATAGAAGTCATGTGGCCTGAAATCAATAGAATTGCACTATGGCCGTAAAGGATGGCTTTAGTAGCAATGAAGAGCTTGCAGTTCCTGATGGCAAGTCCTCAATG	TGAGTGTTGTGAGATGTTTGG	56.389	21	100	100	TCCTTTACGGCCATAGTGCA	59.094	20	100	100	189	380	568	TTGAGTGTTGTGAGATGTTTGG	57.101	22	100	100	TCCTTTACGGCCATAGTGCA	59.094	20	100	100	190	379	568	TGAGTGTTGTGAGATGTTTGG	56.389	21	100	100	GCCATCCTTTACGGCCATAGT	60.203	21	100
nSSR_1439	GAA	9|C6061224:121-547|+	6|C6171769:278-295|-	8|C5122843:461-484|-	8|C5284886:471-494|+	9|C6032259:266-292|+	N/A	N/A	N/A	1.1	0.38	0.99	ATTTCCCTTTACCTTTCTCTCCACCGAAGAAGGGCTTCCAAGAGAGGGACGGGGGCATGCCGAGCAACCATAGCGAGCGAATCCAAAACTTGTTCATAAGCCGGATCGGTGGGCCTGAGGTACTGCCCATCCTGCATTCGTAACAAGACGATGAAGTGATAACTGAAACCCTAGGGTTCCCAACGGTGGATGCTCGAATC	AGTACTTGGGCTTGGGCAGTCTCGATGCGGCGGCGGGCCAGGGGAAGGAAGCGCTGGAGGAGCGCCTCGACGATGAGCCTGGCGGCGCTGCCGGCGTTCATGGGTGATGGCCGGGCGGCGACCGGCTACGAGAGGGGCCAGGGGTGTTCAATGAGGCATGGTGGGCTTTCTCGGAGTTTCCGCTTCCCAGATCGAGCGGG	GGTACTGCCCATCCTGCATT	60.107	20	100	100	GACTGCCCAAGCCCAAGTAC	60.961	20	100	100	130	238	367	CTGCCCATCCTGCATTCGTA	60.179	20	100	100	GACTGCCCAAGCCCAAGTAC	60.961	20	100	100	126	242	367	TACTGCCCATCCTGCATTCG	60.179	20	100	100	GACTGCCCAAGCCCAAGTAC	60.961	20	100
nSSR_1442	GAAA	5|C6191166:1070-1489|+	3|C5960918:248-259|+	N/A	4|C5332762:434-449|-	4|C6086253:1104-1119|-	N/A	3|C7013100:290-301|-	5|C5417061:213-232|+	0.82	0.25	0.97	TACTAACATTTGTGTTGTGTGTGGGCCTCTTTGGTGCCCACTAATCCAAACATGCACCTGAACTAAATATTTTTTTTTTTGATGACATTAATAAGGGTGAAGAAGAAGACTCCAAATTTATATATCAAATAAAACTTAGACAAAAATGACATGATAATTATTGAGAAAAACTAACAAGAAGAGGATAAGAGAGAGATAAT	GAGCAAGGTGCAGCAATATGGATGGAGATGGATAGTGAACAACACTCTGTGGTTAGGAGCTTAATTAGGATGAGGTTGCAATGCAGTAAGGTTCCCAAATGAAGAGTGGCCTCCAGAGGTGGCTACACCGGTGTAGCAGTTCTCCGCGTCTCCGACTCTTCGACATGAACAGCATCTTGTTCTCTGGTACTGTCTGCGCC	TCCAAACATGCACCTGAACT	57.637	20	100	100	TCCATATTGCTGCACCTTGC	58.895	20	99	94	198	244	441	TCCAAACATGCACCTGAACT	57.637	20	100	100	CCATATTGCTGCACCTTGCT	58.891	20	99	95	197	244	440	TCCAAACATGCACCTGAACT	57.637	20	100	100	TCCATATTGCTGCACCTTGCT	60.341	21	99.04
nSSR_1446	GAAA	9|C6093390:464-899|+	N/A	9|C5251807:309-344|+	10|C5358426:678-717|+	N/A	12|C6367672:595-642|+	7|C7116506:712-739|-	8|C5686971:378-409|-	1.57	0.25	1	TGAACAGAGAAGTCTAAAACTGAGTACAAGAATAGAAAGCCTGGAAGGCAACTAGTTAATCTATATAATCTTTTTGTAATGCAAAATTCCAAATAGTTGCGTTACTGAAAGAAGTACATTCTCCACACTAGTTAATCTTATATAATCTTGTGAAAGTTGGCCAAGGAGAGCTGCAACTTGTCCATATTTATAAAAAAAAT	TACATTCTCCTGGCACTGCTTCCACAGATAAGAATTGGCAAAAACGTGTGAGTTCCACTTGTGGTGTTCTTGGTCATGGTGGTTACTGAATGTGTTGTTTTAAGTGAAATAAAATAGTGCATTAATGGAGGAATGAAGGAACATTGTTAGGTAGAAGCATGACACAGAATATAGAGAATTTGAAAACAAAATTAGTAGTG	AAGTTGGCCAAGGAGAGCTG	60.251	20	100	100	GGAAGCAGTGCCAGGAGAAT	60.035	20	100	100	106	353	458	AAAGTTGGCCAAGGAGAGCT	59.52	20	100	100	GGAAGCAGTGCCAGGAGAAT	60.035	20	100	100	107	352	458	AAGTTGGCCAAGGAGAGCTG	60.251	20	100	100	AAGCAGTGCCAGGAGAATGT	59.597	20	100
nSSR_1447	GAC	5|C6218910:2759-3173|+	3|C6208839:336-344|+	4|C5334029:650-661|-	N/A	4|C6008737:680-691|-	4|C6285146:725-736|+	4|C7079386:226-237|-	N/A	0.58	0.25	0.98	CCGAGCCTGTTCCTGAGGACAAGGATAGTGACTCAGATGATGATGGTGAGGAGGATGATGATGATCAAGAGGATCAGGACGATGAAGGTGAAGATGACTCTGGCGATGAAGGACAGGACAGTGAAGGAGCTGAAGATGAGGATCCAGAAGCAAACGGTGAGGGTGGAAGTGATGATGACGATGATGAGGATGGCGAAGAT	GATGAAGATGATGAGGAGGATGAAGAGGACGATGATGATGAAGATACCCCTCAGCCACCTGCCAAGAAGAGGAAATGAGGTGAAGTTCTTCACAGTAGGTTAGCTTTTATTTGTGGTTCACTTCCATTCGTGTTTTAGGTGAGTTAGTCAATAGAAAATGTGGGGTTTGTTCATCGTCGTTGGATTTTCATTGGAGGGAA	AAACGGTGAGGGTGGAAGTG	60.179	20	100	100	AGGTGGCTGAGGGGTATCTT	59.955	20	100	100	124	351	474	CAAACGGTGAGGGTGGAAGT	60.179	20	100	100	AGGTGGCTGAGGGGTATCTT	59.955	20	100	100	125	350	474	CTCTGGCGATGAAGGACAGG	60.179	20	100	100	AGGTGGCTGAGGGGTATCTT	59.955	20	100
nSSR_1449	GAG	5|C6155595:679-1093|+	5|C6191949:1118-1132|+	5|C5253980:835-849|+	N/A	N/A	N/A	5|C7072484:201-215|-	4|C5693759:744-755|+	0.4	0.38	0.98	GGTTGGGGCCGGGGTCGGGCCCCGGCGAGCAGATGGATCGCCAGGTTCGGAGCGCCACCGACGCCGCGCGCACGCGGTGGAAAACCGATGCACTCCGGGAGATGACAGGGGATCCAGGGGCAACGTCGGCGTCCTCGTCGGAGATGAGGGTCTGCACGTCCTTAAAGGAGAAGGAGGATGAGTGGGAGAGGGCCAAAGGC	GCTGCTTTGGCGGCGGCGGCCGGAGATTTGCCGCTCGGGTTCTTGGCCCACGGCGGCCACATGAGATTGCGGAGCTCGCACGTGCGAGATCGCAAGAGATCGAAACAGAGAGATGGAGAGAGAGATGCGCGGAGTCTCTTACTTGAGGGAATGATGAAATGGATTGCTATTTAAGGGAAGTGCACCATACCATAAGGGCT	AGGAGGATGAGTGGGAGAGG	59.736	20	100	100	GTAAGAGACTCCGCGCATCT	59.617	20	100	100	186	371	556	AGGAGGATGAGTGGGAGAGG	59.736	20	100	100	AGTAAGAGACTCCGCGCATC	59.617	20	100	100	187	371	557	AGGAGGATGAGTGGGAGAGG	59.736	20	100	100	CGCGCATCTCTCTCTCCATC	60.387	20	100
nSSR_1450	GAG	5|C6172681:429-843|+	N/A	4|C5277384:715-726|-	N/A	5|C5995305:443-457|+	5|C6312606:783-797|-	N/A	5|C5562317:394-408|-	0.4	0.38	1	AACTTCAATGGGCCCTTCGGGGCGAGCACGGCGACAAGATCATACACCGCGAGGGCCAAAAGCAGCGTCCAAGTCGTCCACTCCGGGAGGTTCGACAACGAAGCGGCGACGATGACCCCGAGGACGACCATGTAAGCCTGTCGGAGCAGGATCGGCACCGCCGGAGAGAAGACAGAGACGACACCCACGGCGGAGAAGTT	CGAAGTAGCCGTATCGAGAGGGATGGCAAAACGTCGGAGGAGAGAGAGAGCGATGGAGCCGCCCATGGAGGCGAGAGCGAGGAAGGCGGAGAAGCGCATGTAGTTCTTGAGACAGGATGTGAAGTTGTAGTAGTAGAGGAGGACGATGAGGAAGGTGGCGATGGTGACGAGGGCGACGAAGGCGGCGGCGTTGAGGAGAG	CCCGAGGACGACCATGTAAG	59.898	20	100	100	TCTCTCCTCCGACGTTTTGC	60.039	20	98.75	100	144	316	459	CATGTAAGCCTGTCGGAGCA	60.108	20	100	100	TCTCTCCTCCGACGTTTTGC	60.039	20	98.75	100	132	328	459	ACGACCATGTAAGCCTGTCG	60.109	20	100	100	TCTCTCCTCCGACGTTTTGC	60.039	20	98.75
nSSR_1451	GAG	5|C6194884:1029-1443|+	7|C6189945:567-587|+	5|C5340565:2045-2059|-	N/A	N/A	5|C6397002:1575-1589|-	5|C7065096:703-717|-	N/A	0.8	0.38	0.99	CTTTCGAAGAAAGTAGAGGGCTTTTGGACAACAAGTGATATCAGAGCTTCAGGTTGAGGCCCAAGTGGTGTATTCTAAGAGAAAGTGAGAATATATGGGATTTGATTAGGGTGAAGAAGAAGGTGGTTGATTAAATAATATATATATGAGTTGGAGGTGATGTTGAGGAGAGGCTGAGCAGTGGTTTGAAAGTGGCGGGA	GAAGTGAGGTTTTCATGGTTCTTTGTTTATGGGTGGTTAAGGTGGAAGTCATAACTTGAAGTTAAAGAAAGAGGAAGGGAGAGAAGACAGGCAAGCTGAAAGTTGGGGTGGGATTGGAACTCATCACCTAAAAATATGTAAGGAAATTGAAAAACAAAGTTTGGGTGTAAAGTTGAAGTGATTTGGATTTATTTTGGTTG	GAGAGGCTGAGCAGTGGTTT	59.964	20	100	96.25	CACCCCAACTTTCAGCTTGC	59.967	20	100	100	158	367	524	GTTGAGGAGAGGCTGAGCAG	60.108	20	100	100	CACCCCAACTTTCAGCTTGC	59.967	20	100	100	164	361	524	GAGAGGCTGAGCAGTGGTTT	59.964	20	100	96.25	GTTCCAATCCCACCCCAACT	59.886	20	98.75
nSSR_1453	GAG	5|C6208316:1070-1484|+	5|C6185661:987-1001|-	5|C5337501:1049-1063|-	N/A	6|C5558426:181-198|-	N/A	5|C7119482:1119-1133|+	5|C5659301:483-497|-	0.37	0.25	0.98	CTTCAATCATGACTGGAGAAACTGAGTCAAGACTTTGCGAGTTTACTAGAAAGGAAGTCGCAGATCTCCTTCGCCTTCAAGGGCTTTTTGTAAGTGTTTCTTCCTTTGTCATTGGCAGATCTTTATTGATATTGGGTTAGAGTCAATTTATTGTTTCTGTGTAGAACCTTTTCCTAGGTCACCATGCTGCGAGAATGCAT	GTGTCTCGCATGTCATTACTCTCAGAGATTCTCGCTGAAAATAGGGAGTGGAAGGCCTCTTTTACTTAGGTTACTGATGATTTGAAGGGAGTAACTGAGGAGAAGAACTTGGCTGTTGGGGAGAAGAAAAGGACTCTTGGTCCACTGAACTTATCCATTGAAAAGTCCCAAAAGCATATGGATAATGAAATCAAGCTGAA	GTCACCATGCTGCGAGAATG	59.624	20	100	98	TCTCCCCAACAGCCAAGTTC	59.89	20	98.33	100	162	377	538	GTCACCATGCTGCGAGAATG	59.624	20	100	98	CTCCCCAACAGCCAAGTTCT	59.889	20	100	100	161	377	537	GTCACCATGCTGCGAGAATG	59.624	20	100	98	CTTCTCCCCAACAGCCAAGT	59.889	20	97.5
nSSR_1454	GAG	6|C6127457:368-785|+	6|C6197219:420-437|+	6|C5063443:296-313|-	N/A	N/A	6|C6379788:817-834|-	4|C7025384:219-230|+	N/A	0.8	0.38	0.98	GCGCGTGCGGACCCGAGAGCTCCATAGATCTATCGATCGATATCCTTCCTTCTCATCGATCGGGCAGCGGCTGAGGAGGAGTAGGAGAGGAGCTGATGGCACCGGCGCCGACGAGGATGGGCATGGCTTTGGAGGATGGGGATCAACCGGAAACACCAACCACTTGGCACGATTCCGCTCCGGAGGTGATCGATGATTTT	GACCGCCCTCTTAGGGTTTATGCTGACGGGATCTATGATCTCTTCCACTTCGGTCACGCGAGAGCTCTTGAGCAGGCTAAGAAATTGTGAGATTTTTCTTCTCCCCTTGTCTTCAACATTGTGCTCTCGTTTGCATAAGAATAAAACTATTGATATTATAATGTTTATGTGATTCATGTTTGATAAAATTCACCTATTGG	ACCGGAAACACCAACCACTT	60.034	20	100	95	CGTGACCGAAGTGGAAGAGA	59.403	20	100	100	131	345	475	AACCGGAAACACCAACCACT	60.034	20	98.75	100	CGTGACCGAAGTGGAAGAGA	59.403	20	100	100	132	344	475	TCAACCGGAAACACCAACCA	60.034	20	98.75	100	CGTGACCGAAGTGGAAGAGA	59.403	20	100
nSSR_1457	GAG	7|C6146155:282-702|+	N/A	8|C5284232:244-267|+	8|C5361494:524-547|-	8|C5925543:644-667|-	11|C6401926:4028-4060|-	N/A	N/A	1.36	0.38	0.99	GACTTGGCCAATAGTGCTGATGCAGTGGATTCTCATGAACAAGGTACTGATGTTTGTTCTCTGTATCTGTTTGGTTGTTTTATTTGTTTTGTTATTTTCTTTCGTCCTAACCCATTTCACATGCAGGGACTGTACAGCCTCAGGAGCTAGGTGTTAATGCAGACATATCTATCCCACATGAAGGTGAGGAGGAGGAGGAA	GTGGAGGTGAAAAAGGAGGAGGGAGTTAATGAAGGGGAGGTGTGTAATCCCTCAGATAATGAGGATGGTTCAGTTGTGGAGGATGAAGCACCAGTCAATGATGTGCTTAATCAAATTGAACTGGTGGCTGATAGAACTACTGCTATTCTCCCGGAAGATGCACCAAAGAAATCTTATGCTTCAATTGTAAGTGATAAGTT	ACTGTACAGCCTCAGGAGCT	60.252	20	100	100	CTGGTGCTTCATCCTCCACA	59.674	20	100	100	187	328	514	ACTGTACAGCCTCAGGAGCT	60.252	20	100	100	ACTGGTGCTTCATCCTCCAC	59.674	20	100	100	188	328	515	AGCCTCAGGAGCTAGGTGTT	60.252	20	100	100	CTGGTGCTTCATCCTCCACA	59.674	20	100
nSSR_146	AAGAA	5|scaffold26276:434-858|+	N/A	2|C5313426:1100-1109|+	N/A	5|C5906853:264-288|-	5|C6288270:512-536|+	3|C7033712:515-529|+	N/A	1.26	0.38	0.99	NNNNAACTGTAAACTAAACAGAAAGGAACAGTGTTATGCATAAAAACATAAATAAAGTTTTTCATTTTTCCCCCAAATCAATATAGATGGTAAAAAACATTAATTAGATTATGATAAATTTTATAAACAGCAGTAATTTGTAAGGATTTTAAAGTCCAAAACAGTATAGATGAAGAAACAATGCTCCATTTATTCAAAAG	ACAATGCTCCAAGGCTGTACCAAGGTTTGAGATTTACGGATGATGCGAACCAAAAACTTTTCATCTTCACTGGAATAGGAAAGCACACTTTAATCAAAGAGCTAGCATAAATGTTGAATAGGAAAGCACAATTACATAAATGTTGAATGCCATAAAGTAATTTTATAACCAGCTATAATTTTTCTCCCGTGCTTGGCAGC	GATGAAGAAACAATGCTCCA	53.876	20	100	100	TTTTGGTTCGCATCATCCGT	58.471	20	100	100	112	368	479	GATGAAGAAACAATGCTCCA	53.876	20	100	100	TGGTTCGCATCATCCGTAAA	57.612	20	100	100	109	368	476	GATGAAGAAACAATGCTCCA	53.876	20	100	100	TTGGTTCGCATCATCCGTAA	57.612	20	100
nSSR_1460	GAG	7|C6178906:739-1159|+	N/A	7|C5275092:454-474|+	6|C5208524:353-370|-	9|C5887606:320-346|-	7|C6201784:299-319|-	9|C7003570:192-218|+	9|C5648027:184-210|+	1.16	0.12	0.99	CTGGTTCAATCTCCACGGAGATGGGCGAGACCAAGCGCTGCAAAATCTCAGGATCCATGAGTGCCTCGTCTCTCAAACTCCCTTGCATTCTTGAAGCCGTTTGAACCACTCTGTTCCACAGAACCTGCTCGTCCTCCTCTTGGACGACGGATTGCTCGGGGGTTGGAGAAGGAGTGGAGGTCCTTGGGTTGTAGATTGAA	TGGCCATCCGGTCTTCCGTCGTCGGTGGAGCCAGCCACCGGCTTGATTGTCCCTCCTCCGCCGCCGCCGACAGAGGCGGTCTTCCCTGAGAAAGAGGAAGTTGTCGTTTTGATGGTCGGAGAGGGACCAAAACCGGGCCTTTGGCGCTGCTCGTGGTGGGTCACTGAGAGGGTGGAAGTGCTGGTTTGGGAGGGGATGGC	TTCCACAGAACCTGCTCGTC	59.966	20	100	100	GGAGGAGGGACAATCAAGCC	60.107	20	100	97.5	167	313	479	GAGTGGAGGTCCTTGGGTTG	59.963	20	100	100	GGAGGAGGGACAATCAAGCC	60.107	20	100	97.5	109	371	479	CTCTTGGACGACGGATTGCT	60.109	20	100	100	GGAGGAGGGACAATCAAGCC	60.107	20	100
nSSR_1461	GAG	8|C5941905:179-602|+	5|C6173959:230-244|+	6|C5154697:450-467|+	6|C5280044:247-264|+	N/A	N/A	N/A	4|C5647675:469-480|-	1.33	0.38	0.99	GACTGTTCCATTCCTTTGATGAGAACGGAGATGGCATGATATCCCCAGAAGAGCTGTGCAAATGCGTGGAGAGTGTGGACCTGCAGGAGCCGCTGTCCATGGAGGAAGCTGAGGCCATTGTGGAGATGCTGGACTCCAACCACGACGGACTGCTGGATTTGGATGATTTTTCCAGACTGATGGAGTGTGAGTGCGGGGAT	TGCAGGAGCTTGAGAGGGGCCTTTGACGTGTACCAGATGGAAGACCAGGGATGCATCACTCCCAAGAGCCTCAGTTGTGCGCTCCGCCGACTCGGCCAAGGAAAAACAGTCGAGGAGTGCGCCGCCATGATTCGTCATTTTGATCTCAACGGGGATGGCGTAATAAGCTTTGATGAGTTCAGGATCATGATGCGCTAATG	GAGGAAGCTGAGGCCATTGT	60.035	20	100	100	GGCTCTTGGGAGTGATGCAT	60.107	20	100	100	193	279	471	GACGGACTGCTGGATTTGGA	60.036	20	100	100	GGCTCTTGGGAGTGATGCAT	60.107	20	100	100	151	321	471	GAGGAAGCTGAGGCCATTGT	60.035	20	100	100	TCCCTGGTCTTCCATCTGGT	59.881	20	100
nSSR_1464	GAGCCT	5|C6154997:752-1181|+	5|C5982214:215-244|-	4|C5265270:363-386|-	N/A	5|C5890671:411-440|+	N/A	N/A	3|C5622265:332-349|-	0.8	0.38	0.97	GCTAGAGTCTAGAGAGAGAGATTATTATTATTATATTGGAATATTCTAACAGTAAGCAACACAAGACAGAGAGAGAGAGAGAGAGAAAGAGTGTGTGTAATTAGTGAGGGCACCAACCGAGGATGGGAATTGGAAAGAAGAAGGAAAGAGTGATGAGTGTAGCTGGGGTTTTTGTTTTCTGTTTTCAATGCAGTGTGGCA	GCCTGGTTTGTCATCATGTTGTATTAATTGGTTTTACCGAGCTGGTTCACATCATGCGCGTATAAACAAAACAAATGGCTCTGCTTCTTGTAGTGCATTTAAAGGGACGTTCAGCTTTTTCAGAAAAGGTTTGGGTTGGGTTCATGGGTTGGTTTGGGTTGGAGCACCTCTTGACTCTTAACATGCCCAAATATAGAAGC	CACCAACCGAGGATGGGAAT	59.744	20	100	100	CGCATGATGTGAACCAGCTC	59.624	20	100	100	178	310	487	CACCAACCGAGGATGGGAAT	59.744	20	100	100	TACGCGCATGATGTGAACCA	60.39	20	100	100	182	310	491	CACCAACCGAGGATGGGAAT	59.744	20	100	100	ATACGCGCATGATGTGAACC	59.063	20	100
nSSR_1465	GAGGGA	5|C5906733:154-583|+	6|C6238889:1231-1266|+	N/A	N/A	5|C6088339:1033-1062|+	5|C6273742:649-678|-	N/A	2|C5761619:1396-1407|+	1.36	0.38	0.99	CTTACCGTTGCCTTCTTGAGTTCGTGTATTTTACCCAAAGCAACCTCACTTAGCAGCATCAGGCCTACTGGATTTTTCTTGTCAACGTAGCAATATTGAGCGCTCTTACTAACTAGATCAGCAAAGTAAATTCCTTTTCCAAACTGAGAACAGAAAATGGAAAAACATATATCACATTCATGGCTTGTTAGAGAGGGAGT	GAACCATGTATCCTGTAACTGGAGCTTCTGGTGGGGCTATTCTCAGACCTTGACTGAGAATGCCCACAAAATTTGTCACCCGGGAACCTGTCGAGCAGACAAAGGTTTCAGTCATTTGTCTCCCATATGTCTCAGAAAAGATGAAGTAATCTTTACATTCAGTTTGGATTTATCCACAATAGTATCATGCAACTACATTA	TGGCTTGTTAGAGAGGGAGTG	59.097	21	100	100	CAGGTTCCCGGGTGACAAAT	60.251	20	100	100	140	333	472	TGGCTTGTTAGAGAGGGAGTG	59.097	21	100	100	AGGTTCCCGGGTGACAAATT	59.519	20	100	100	139	333	471	TGGCTTGTTAGAGAGGGAGT	57.673	20	100	100	CAGGTTCCCGGGTGACAAAT	60.251	20	100
nSSR_1467	GAT	5|C6014040:323-737|+	5|C6207485:197-211|-	5|C5338071:1481-1495|+	N/A	N/A	5|C6054666:193-207|-	6|C7096704:847-864|-	N/A	0.4	0.38	0.99	AGTAATAATCCTTTAACCAAGGGAAAAAGATGAACCTCTAGTTGTTCATGCAGTCTTCTCTGGAGTTCCATTTGGCCTTTCATCGCCTCATTGCATCCACTGAGAAAGAACTGAGTGAGATGTCATCAAGAAAAAAGGCACATACCCAATAATGCAAGTCTTACTCATTCACGTCTTGATTAACTAATCTTGATGACGGC	AATTGCCTTGGTCCAGGTCCCTGAGTCTCCTTAATGTCATTACCTGCAATCCCATGGCAATATTGATACTAAACCCTAAAATCAAAAGTAAATTCAGCAGCAAGGAATTACAATGTCACAGTATTCAAACAGTTGGAGTTGGTTTTTGTTCTGCTAGACTTGTACATGAGTGAATTTTCATTTTCCTACCTACCTAAAAA	TCATCGCCTCATTGCATCCA	59.819	20	100	100	ATTGCCATGGGATTGCAGGT	60.326	20	100	100	197	279	475	ATCGCCTCATTGCATCCACT	59.818	20	100	100	ATTGCCATGGGATTGCAGGT	60.326	20	100	100	195	281	475	TCATCGCCTCATTGCATCCA	59.819	20	100	100	TGCCATGGGATTGCAGGTAA	59.666	20	100
nSSR_1468	GAT	5|C6020990:173-587|+	2|C6210049:227-232|+	5|C5208977:412-426|+	N/A	5|C6076439:1245-1259|-	N/A	N/A	4|C5567765:388-399|-	1.17	0.38	0.99	TCCTAAGAAGACGATGACAGGTAAAACACCGGAGCATGAAATCTAGGAGAAATGTTCACATTAATGTGATTGGAAATAGGAGGAACAGCAAAGAGTAATAATCTTCGCATTATGAAAGCAAGCAAATGGGAGGAAGATCAAGAGAGTTCCAGAGTGATAATTCTCCGTCGTTCTTTGCGTTCACAGCTGATGGTGATGAA	GTAGATGTCAATGGAGAAGAAGATAAAGAAGAAGAAAGAGAGGAAGAAGTTGATGAAGAATGAACTTCATTCACTTCTTGTTTCATGACTCCCCATCCTACCTTATTATCTTCATGCCTCAGTCTCAAGCATTCAGATATACCATTGAGTGCATAGAGTGAAGCTGAGATCTTTCTCTCATACTTCATCCTCTTCATTGC	CTCCGTCGTTCTTTGCGTTC	59.839	20	100	100	TGCTTGAGACTGAGGCATGA	59.021	20	100	100	184	334	517	TCTCCGTCGTTCTTTGCGTT	60.249	20	100	100	TGCTTGAGACTGAGGCATGA	59.021	20	100	100	185	333	517	TTCTCCGTCGTTCTTTGCGT	60.249	20	100	100	TGCTTGAGACTGAGGCATGA	59.021	20	100
nSSR_1469	GAT	5|C6064894:451-865|+	5|C6141309:744-758|-	6|C5099309:204-221|+	N/A	5|C5893509:508-522|-	5|C6201240:410-424|+	N/A	N/A	0.4	0.38	0.99	AGCTTCAGTCTTGAAGATGAAAATTGAGCATAGAGCAGGGAAAGGGAATTTTTTGAGCAAGAGGCAGAGTTCTTTGGTGACATTGTCATGGTGCCTTTTATGGACAGCTATGATCTTGTCGTTCTGAAGACTGTGAACAACAATATGCGCCATCTCTGAAATCAGGAAGCTGCTGCTGTTTGATGATAATGTTGATAATA	AATGTTGATGAAGAGAATGAGAGAAACATGTCGAAGCTAACACCCATGTCAACTTTTAAAGGGCAAGGAGAAGTCCCAAGGACCTACTTCAGCAATTGCTTTGGCACAAGAAGCTTCTAAAAGAAGGATGGAAACAGCTACTGCTGCTACAAAGCAAACGGAGAACTTGGATGCGATAGTGAAAGCTGCAAAACTGGCTG	GCGCCATCTCTGAAATCAGG	59.057	20	100	100	CCTTGGGACTTCTCCTTGCC	60.323	20	100	100	150	346	495	GCGCCATCTCTGAAATCAGG	59.057	20	100	100	GGGACTTCTCCTTGCCCTTT	59.594	20	100	100	146	346	491	GCGCCATCTCTGAAATCAGG	59.057	20	100	100	TCCTTGGGACTTCTCCTTGC	59.307	20	100
nSSR_1470	GAT	5|C6164777:920-1334|+	6|C6216175:281-298|-	N/A	6|C5379968:606-623|-	4|C6038199:887-898|+	5|C5852128:181-195|-	N/A	N/A	0.75	0.38	0.96	GCGGTGTCCTTGGCGGACTGGACCCATTGCTCGCCCTTAGCCTGCATGCATGCGCGGAGGTCAGTGAATTAAGCAATATGACAAACACATGATGAGCATGTATATATGTACAAACCTGGCCCTCTCCGTGGGCTTTGCCGGCGTTGAACGTCTGCTTGGTGTTCGACATTATGCCTCAAAGAGTTTGTTTATGGGAGGAG	GTAGATAGAGAACAACTTGGGAGACTTGTTTGTGTTGCTTGGTGTTGCTTGGTGAAGTAGAGTGGTGACTCTTGGGGGGGTTTATATAGTGGTCGAAGGGGTGGTGAGGGAGAGCCACGTGGCAGAGGGGAACGGATCTCTGGGCTTGTAATCAGGTTTGCCCGTTTTGAACTTTGAATTAGTCCGGTGTGTCATGGCTT	GTACAAACCTGGCCCTCTCC	60.035	20	100	100	CCAAGCAACACCAAGCAACA	59.825	20	100	92.5	160	307	466	GTACAAACCTGGCCCTCTCC	60.035	20	100	100	CACCAAGCAACACCAAGCAA	59.825	20	100	91.25	162	307	468	GTACAAACCTGGCCCTCTCC	60.035	20	100	100	ACCAAGCAACACCAAGCAAC	59.824	20	100
nSSR_1474	GAT	6|C6117190:105-522|+	6|C6238431:1270-1287|-	6|C5324420:1117-1134|+	7|C5290804:229-249|-	6|C6081265:1430-1447|+	N/A	N/A	7|scaffold10464:1556-1576|-	0.47	0.25	0.99	AGGAGATTGTCATTGCTGCCAATGAATCAAAATCTTCATCTAAAAAAAAGAAACACACAGGTCGCATTAAGGGGAAGGATGTGAAAGATGATTTTGTACAAGATGATACCAAGTTTTCAAGATTCAGTGATCCTGATAAAGTTATTGATCCAGCCTTGATCAGCGGTGGGACACTTTATGAAGAAAAAGAAGAAGATGAC	AATGAAAGCAAGAATTCTGAAGCTTCAAGTGACTCATCATTGCAGCCATATGATTTAACTGATGATGATTCAGATCTACAAAGAAAAATCTCACAGATAGGTGAAATTTCTGCAGCATTACGAAAGCCTGATGATGCAGATGGTGTAAGTTCTTATTTCCATTTGCATCTTCTATCTAGTGGTTACATCCCTCTCTGTGC	CTTGATCAGCGGTGGGACA	59.704	19	100	97.89	CAGGCTTTCGTAATGCTGCA	59.196	20	96	100	194	258	451	CTTGATCAGCGGTGGGACA	59.704	19	100	97.89	TGGCTGCAATGATGAGTCACT	59.996	21	100	100	112	258	369	CTTGATCAGCGGTGGGACA	59.704	19	100	97.89	GGCTTTCGTAATGCTGCAGA	58.913	20	96
nSSR_1475	GAT	6|C6189460:19-436|+	6|C6214885:225-242|-	N/A	N/A	11|C6074673:977-1009|-	11|C6401530:2098-2130|-	6|C6904712:210-227|+	10|C5739681:726-755|+	2.36	0.25	0.99	TGGAGTCATTTCACCGATCACTCCATCACCATAACCAAACTCTTCAACTTGAAGAAACGGGTCATTCAGAAGCTCCCTTGCAGAAAGCCTTTGCGATACCGAAACCAAGCACTTCTCGATGAATTGCTTCACTTCAGGATCCTTAACTCTGTAAAAAGCTTCAGGCTTTGTTCCCTATCAAATAGAAAAACACTAAATAA	TATGACAATATTGATAAGAAAGGTCGGTGTAGGCCGATATAAAACACTTACAGAGATAACTTTCTTATAGATTTGAGCAGGATGATTACATTCACTATATGGATACTCAAAGGTTACCATCTCCAAGACACACATTCCGAAAGAGTATATATCTACCAATTCATTGTACTCTTCTTCATAAACCTCCGGCGCCATGAACT	GCGATACCGAAACCAAGCAC	59.904	20	100	100	GGCCTACACCGACCTTTCTT	59.676	20	100	100	161	110	270	GCCTTTGCGATACCGAAACC	59.902	20	100	100	GGCCTACACCGACCTTTCTT	59.676	20	100	100	167	104	270	CTTGCAGAAAGCCTTTGCGA	59.688	20	100	100	GGCCTACACCGACCTTTCTT	59.676	20	100
nSSR_1477	GAT	7|C6081250:326-746|+	8|C6171921:870-893|-	7|C5328638:1197-1217|+	N/A	8|C6027131:685-708|+	N/A	4|C7111760:751-762|+	N/A	1.47	0.38	0.97	CCAAGATTGGGAATTTCGGGATGGCGAGGTCGGTGGAGAGTAAAGAAGCGTTGCAGCTCACCAGGCATGTGACTGGGACGAGAGGGTACATGGCGCCGGAGTTTCTTGAGCACGGGTTGATCAGTCCTAAGGTGGATGTTTTCGCATTTGGAGTTGTGATGCTGGAGATAATGTCAGGCAAGGAGGCTGTGTTTTCCAGG	GGTGATGACAAGGAACAAGAACAACAAGTAGTGTTTTTGTCGGCATTGATAGAGCCAGTGCTGAGTGGGGAGAATGCGCGGAGTGAGCTGAGGGGTTTTCTGGATCCTTGTTTGGGAGAGGATTACCCGTTCGATTTAGTGTATGCTATGGCTCAGCTGGCCATGAGGTGTGTGGCTCACGACCCGTCCTCTCGCCCGGA	TGAGCACGGGTTGATCAGTC	60.037	20	100	100	ATTCTCCCCACTCAGCACTG	59.383	20	100	100	190	306	495	TGAGCACGGGTTGATCAGTC	60.037	20	100	100	CATTCTCCCCACTCAGCACT	59.383	20	100	100	191	306	496	GCAAGGAGGCTGTGTTTTCC	59.685	20	100	100	CCAGAAAACCCCTCAGCTCA	59.598	20	100
nSSR_1478	GAT	7|C6154975:389-809|+	N/A	N/A	7|C5096207:345-365|+	7|C6068579:1201-1221|+	N/A	7|C7133274:1271-1291|-	8|C5736021:944-967|+	0.4	0.38	0.98	TTGCTAAAGAGAACATTAAAGGAGGACATCTAACATAAAAATATGAAGGAAAGAAGAATTTTTTCAAGACAATGATACGTACAACTCTTTCATAGTTTGAGAAGAACATGAAAGCTGACATTGCACTCTTTGGTGAATTACGTTCCTTTGATTTCTTCTTCCTTGACTTGCATGAACTTGTTTCACCCCTAACCTTAGTA	TCCTCACTTGCACTGCCACCATTCTTTGAATTATTTATCGCAACTATCTGATATGAAAGCAATATATTTAGGTTTCATATTAATATTCCCCATCAAGATGCATGGTGCCATGCTTTCAACAAAGTGAAACAAGTTTGCAAGAAGGTATCTAATGCATTAATTATATATGACCAATACCTCTTTATCCTTACTGCCACTAC	GCTGACATTGCACTCTTTGGT	59.389	21	100	100	GAATGGTGGCAGTGCAAGTG	60.039	20	98.75	100	132	313	444	GCTGACATTGCACTCTTTGGT	59.389	21	100	100	AGAATGGTGGCAGTGCAAGT	60.179	20	98.75	100	133	313	445	AGCTGACATTGCACTCTTTGG	59.115	21	100	100	GAATGGTGGCAGTGCAAGTG	60.039	20	98.75
nSSR_148	AAGTG	5|C6153309:603-1027|+	5|C6144389:720-744|-	N/A	6|C5264732:609-638|+	5|C5972941:242-266|-	5|C6185558:313-337|-	3|C7033332:565-579|+	3|C5754943:296-310|+	1.05	0.12	0.99	ATTTCACCAAGAAGGGAAGTTACCAGAAATTATTCATAAGAAAATTTACTATAAAAATTTAACAAGTTAAAGAGCACATTTCATATAAAATCCTGAATAAGTTCCACATCGTAAGAGTAAATCATGTCCTATTAAAGTCTCCAAAATTGCTCAATCTCAAGGAGTATTTCTTTGTATCTATTCTCCTTTTCACATAAAAA	CATTTTTGGCACTGAACTATACCCTGCATTCATTTTGGTCTTTGAACCCATAAAAATTAAATTTGTTACTTGAACTAAGAAGTATGGGAGGAATCCCTAAACTATCAAAGAAAGTGCACAGTTTTGGTCCCTATTCAATTTATTTTTTAACCTTAGACAAAAATGAATATATGGGCATAGTTCGCGGACCAAGAGTGCAT	TCCTGAATAAGTTCCACATCGT	57.181	22	98.23	93.18	GCAGGGTATAGTTCAGTGCCA	59.79	21	100	100	162	290	451	CCTGAATAAGTTCCACATCGT	55.692	21	98.13	92.86	GCAGGGTATAGTTCAGTGCCA	59.79	21	100	100	161	291	451	CCAAAATTGCTCAATCTCAAGGAG	58.592	24	98.6	100	GCAGGGTATAGTTCAGTGCCA	59.79	21	100
nSSR_1480	GAT	8|C6136477:239-662|+	N/A	7|C5246339:594-614|+	N/A	7|C6046597:459-479|+	N/A	6|C7113972:1057-1074|-	6|C5732121:763-780|+	0.75	0.38	0.99	GGAGAAGATTGTACCAGCTTGTGTCATTTCTCCTCCTTGGCAAGCCAGCCATGGTGGTATCTGATCTCCTCCTCCTCCTCTCATGTTGAACTGCTGCTCTCTCTTCAGTGACAGCTCTTGAACTTCATGGCTGCTGTTCATCATGCTGTTGTTGCTGTTGCCATTGCCATTAATGTTGTTGTGAGTAGTGAAGAGAAGTG	TATGATTGATCATTGGATTTACAGCAGTAGTGATTGCTCTTGCACTCTCCTCTGCCAATGCATCACAGAATGCCCTGTGTGTTATAAAGCTATCTCTCCTGCAACCAAATTAATTACCATCTCAATTCATCATGTCTTAATTTGTTTTCATCTTGATATATGAAGATCATGAACATGTTTATATATGTATGTATATATAT	GGCTGCTGTTCATCATGCTG	59.899	20	100	100	CATTGGCAGAGGAGAGTGCA	60.036	20	100	100	156	328	483	GGCTGCTGTTCATCATGCTG	59.899	20	100	100	TTGGCAGAGGAGAGTGCAAG	59.964	20	100	100	154	328	481	GGCTGCTGTTCATCATGCTG	59.899	20	100	100	GGCAGAGGAGAGTGCAAGAG	60.108	20	100
nSSR_1482	GAT	8|C6192738:1140-1563|+	N/A	N/A	N/A	8|C6016651:635-658|+	8|C6374310:1163-1186|-	8|C7111864:1145-1168|-	12|C5660255:351-386|+	1.6	0.38	1	AGTGCCTGCAATTGCATTGCTTCTGCTTTTTTGGAGTACCATCCTTCACTTCAAATATAGGACGTGGTCGTGACCTCGGGGACTCCGGTTTACTGGCAAAGGAGGACGACGATGATGATCAGTAATCAGACAGCATTTTATAAATGTTTAAGGTTTATCTAATGTCAACTGAAGCTTCCTGAGCATCATAGGAGATGATC	CAGTAATCAGACAACATTTTATAAATGTTTAAGGTTTGTCTAATGTCAACTGAAGCTTCCTGAGCATCATAGCAGATGATCTTCAGCTAAAAAATGTTCCCAAGAGCACATGCATATAAAACTTGCATTCAGATACAGTTCAAGTCAGTCAAAACAAGCTTTATCACTTAAAAATTCATGAAATTATATCAATAAAAGAT	GCAAAGGAGGACGACGATGA	60.109	20	98.75	100	CTCAGGAAGCTTCAGTTGACA	57.883	21	100	100	193	295	487	TGTCAACTGAAGCTTCCTGAG	57.883	21	100	100	TGCATGTGCTCTTGGGAACA	60.179	20	100	100	176	362	537	GCAAAGGAGGACGACGATGA	60.109	20	98.75	100	TCAGGAAGCTTCAGTTGACA	56.7	20	100
nSSR_1483	GAT	8|C6196268:855-1278|+	N/A	9|C5203963:235-261|-	N/A	8|C6044595:1157-1180|-	8|C6392550:751-774|-	N/A	8|C5449525:235-258|+	0.4	0.38	0.99	GGAGGGATAAAATTTCTGATTTTGAAGAAGATCCTATGGATTTTCTCAAAGTGAAAAGGTTCGCAAAATTCAGCAAATCTAAAGGAAAAGAGGACCCGGATCCAGAAAATAGTAAATCTCCCCCAGAGGGATCAAAAGAAGAGATTACTGATTCTTTGCCAAAGTCCACAGATGTTGATCCCAATGTTGAGGCAGAGGAG	TTTATAACTAATGAGGTAAAGAAGAGGTTGAAGGAGCTGAGGAAGAATACTTTCATGGTTCTGATACCTGAGGAGGAACCTGACGCCGAGGAGGAGGATGAGGAGGAGGAGACGAGCTCCAGTGAGTGGAGAGAGTCAGAGGTGGAAGATGGATATCCATGGTGTGGGTTTGATACTTTGTATGATAAGTACTGTGAGCG	CCCAATGTTGAGGCAGAGGA	59.671	20	100	100	CACTCACTGGAGCTCGTCTC	59.83	20	100	100	173	379	551	TCCCAATGTTGAGGCAGAGG	59.671	20	100	100	CACTCACTGGAGCTCGTCTC	59.83	20	100	100	174	378	551	CCCAATGTTGAGGCAGAGGA	59.671	20	100	100	TCGTCTCCTCCTCCTCATCC	59.816	20	100
nSSR_1484	GAT	8|C6223276:3698-4121|+	8|C6162111:336-359|-	7|C5240715:764-784|-	7|C5395904:1352-1372|-	8|C6007591:596-619|-	7|C6372198:1303-1323|-	7|C7124208:436-456|+	N/A	0.49	0.12	0.99	ACAAAAGAACAATCACAGGCATTCTTTCTGCTAATCATCTGCAGAAATCCTTGAAGCCCACTTCACTCACACTCTTCCTTGCAGAAACCAACTGCTGAGACTTCTTACAGTAAGCAATGGCTCCTTGGATGGAGATCTCCACTTCAGAGTTAACACTACTGCTTCTCTTCAACATTGGTGTTGCATTGGAAGAAGAACAA	GTTGATGAGTACTTGCTGGATGTGTGCCATTTAATGGCACTGGAAAAGGACCTTCTATGAGAGCAAACCTCATTTGTAATCTTATCATGAGGCACTGCAGTAGACTCATCTGAACATCTAGATTTGAAGAAAAAAGACTTGAGATAAGACAATGAGGAATGCTTGATTAGCTTCAGCTTCTTAGACCAAGACTTCTTCTG	GCCCACTTCACTCACACTCT	59.605	20	100	100	TGGCACACATCCAGCAAGTA	59.6	20	100	95.83	198	255	452	AGCCCACTTCACTCACACTC	59.605	20	100	100	TGGCACACATCCAGCAAGTA	59.6	20	100	95.83	199	254	452	GCAATGGCTCCTTGGATGGA	60.396	20	100	100	TGGCACACATCCAGCAAGTA	59.6	20	100
nSSR_1489	GCA	6|C6029158:9-426|+	6|C6217829:975-992|+	6|C5291482:285-302|-	7|C5382640:1088-1108|-	6|C6042839:563-580|+	5|C6284368:447-461|+	N/A	N/A	0.58	0.25	0.99	ATGCCGCCAAGACGAGGTCCAGGCCGTCCACCCCGTGTGCCCCGGGCGGAACCTGTTGAGAACCCTCAGATGGGGGTGCCCGGAGGTGGAGTGTAGCAAGGGGAAGCGTCCCAGGCCCACTACGGGTAGGGATACAACCCGGGAATACAGCAGGCCTTCGAGATGATGGCCCAACACTTTGTATCCCCGGCCTTTACCCC	GCCACAACAGTATAGGAGCTGGGACATCGACTATGTGACCCGGGCCTGACAAATGGGAGTGTCCCACTTTGTCGCTACACCGGAGCCTACAGATGCCGAGGCATGGATTCGGCACGTGGAGTACGTCTTCGAGGCCATGAGGGTCCTGGAGGCTGAGAAGATCATTATCGTTACCTTATTGCTGGGCCCTGAGGCCCTGA	ACAACCCGGGAATACAGCAG	60.035	20	99	100	CCCGGGTCACATAGTCGATG	59.968	20	100	100	129	141	269	CACTTTGTATCCCCGGCCTT	60.034	20	99	100	GGTGTAGCGACAAAGTGGGA	59.966	20	100	99	125	182	306	ACAACCCGGGAATACAGCAG	60.035	20	99	100	GGTGTAGCGACAAAGTGGGA	59.966	20	100
nSSR_1490	GCA	6|C6074324:149-566|+	N/A	6|C5322620:788-805|+	N/A	8|C6086395:2589-2612|+	N/A	4|C7038432:282-293|+	6|C5702933:579-596|-	1.26	0.38	1	TTGTTTGAGCGAGTTGATTTCGGAGATGATCTTTGAGGACCATCTGAAGATCCAGTTCTACGTGAAGATGACAAGATGACACATACAAATTTTAGTATCTGCATGTATATGATGTTCAACTAGCCAGACATTCAACAAGATAATTCTTCATGATCTTTGATGATATTTACTTAATAGCTGAAACACTAGAACCACATTGT	AGACAAGAACCATTTCATGATCTTTGAAGATGTCTACTTAAAAAATATAAGCTACTAACAAAATCCAATAGCTGAAGAACTAGAAACACATTGTACTGCAGCAAGATAAGAACCAGTTCATGATGCAAACCCATGTGAATTCTTTTAAGCAAAAGTTCAACTGCAGACACACTGAACAAATTGGGTTTCTCATCTGGTTC	AGCTGAAACACTAGAACCACA	57.162	21	100	100	TGGGTTTGCATCATGAACTGG	59.106	21	100	100	176	323	498	AGCTGAAACACTAGAACCACA	57.162	21	100	100	GGGTTTGCATCATGAACTGGT	59.105	21	100	100	175	323	497	AGCTGAAACACTAGAACCACA	57.162	21	100	100	GGGTTTGCATCATGAACTGGTT	59.7	22	100
nSSR_1491	GCA	6|C6106624:429-846|+	11|C6182345:850-882|-	6|C5245449:309-326|+	N/A	8|C5928429:603-626|-	N/A	10|C7049812:532-561|-	10|C5594103:202-231|+	1.98	0.25	0.99	CTTCTGAGCAACCACATGCAAAGAAGCTTCCTGATTTCCCAATATCAGCATCGGCAGTTAAGGGAGGAAGCAGAGGAGTACGGGGAGGGGGTTCAGTTCTCTTTTGACTTTAGCAGCACAGGTGAGTCGAAGACTCAGAGGTATGGAGGAGAGGAGTCCCCTTCTCGTACCCCAGGCTCCGGCATATGCGGAGAAGGGGC	AGGCTACTGGCGCTGAGGAAGCCCCACCCAAGGACGCATTCCACATCGCGTACCTGATCTACTTCACGCTCGGCGCCGGATTCCTCCTGCCGTGGAACGCCTTCATCACCGCGATCGACTACTTCAGCTACCTCTACCCAGCGGCTCCCGTGGATCGCGTCTTCTCCGTATGCTATATGATATCCTGCTTGATCCCCCTT	AGGAGTCCCCTTCTCGTACC	60.033	20	100	100	GCCGAGCGTGAAGTAGATCA	59.899	20	100	100	141	351	491	GAGAGGAGTCCCCTTCTCGT	60.034	20	100	100	GCCGAGCGTGAAGTAGATCA	59.899	20	100	100	144	348	491	TTAGCAGCACAGGTGAGTCG	60.038	20	100	96	GCCGAGCGTGAAGTAGATCA	59.899	20	100
nSSR_1492	GCA	6|C6204568:677-1094|+	9|C6122933:349-375|-	6|C5328512:1029-1046|-	N/A	6|C6088209:3183-3200|-	6|C6397276:1278-1295|-	8|C7096632:649-672|+	N/A	1.21	0.25	1	CAGTTAGAGTTGCCACTCCCACCCACACAAGTTGCGCTGGATTGCTTCCTAAAACTCATTTGGCGGGTGAACACCAATACTTCCCCTCCCTGATCAGAAGAATCTCCACACTCACTAGCGGGAAACAAGTTTATGAAATTAAACCAAGGGATGCCTTTCAGCTCAGGGCTATTAGTATGACAGCACAGTGCCATTACCCT	GAAAGGGCTACTCTTGTTGATTCAGATGCGGAGGTTGATGATGGAAGGCTGCCAGGACTTGAGCCAACAATGCCTGGTGAGAAGCCACGGGTTGCCATTCTGGGCACTGGATGGGCTGCCTGCAGGTTTCTTAAAGGACTGGACACAAAAATTTATGATGTTGTCTGCATATCTCCAAGGAACCATATGGTCTTTACTCC	AGGGATGCCTTTCAGCTCAG	59.745	20	100	88	CTGGCAGCCTTCCATCATCA	60.107	20	100	100	127	346	472	CCACACTCACTAGCGGGAAA	59.68	20	100	100	CTGGCAGCCTTCCATCATCA	60.107	20	100	100	168	305	472	CCAAGGGATGCCTTTCAGCT	60.324	20	100	97	CTGGCAGCCTTCCATCATCA	60.107	20	100
nSSR_1493	GCA	7|C6112154:123-543|+	6|C6124473:275-292|+	N/A	N/A	6|C5962377:320-337|-	6|C6361986:454-471|+	5|C7085542:239-253|+	N/A	0.63	0.38	0.98	GCATGTTCATGATCATCATATCCCCCACAACCATAAATATTAATAATCTCCCACTCCACCCATCTGAAAACCTCTTATTGTTAGAGATAGCAAGAGTGAGAGAAAGAGAGTACTGAGTGAGAAGATCTTACAAAGAAGAAGGGAAAGAAGAAACCATGTTGTCATTAACATTAGATTGATTTGGTTGGAGTACTGGCTCT	GGATGGCCTTGAACACTCTCCCAAATAAGAAGGCCATTAAAGTGCTGTGAATCCATCCAATCACTGAGCTCCTGTTTCCCAAAGCTCTCTCTGCTAGTTTCCCCTCCATCCTCATGAGCACAACAATGGAGGCCATCCATGGCCACCATGTTCCCCAGACTATCAACCAATGGAGGCAAGTAGTTTGGATCCATATTGCT	TCCCACTCCACCCATCTGAA	60.179	20	100	100	GGGAGAGTGTTCAAGGCCAT	59.67	20	100	100	195	170	364	ATCTCCCACTCCACCCATCT	59.655	20	100	100	GGGAGAGTGTTCAAGGCCAT	59.67	20	100	100	198	167	364	CTCCCACTCCACCCATCTGA	60.619	20	100	100	GGGAGAGTGTTCAAGGCCAT	59.67	20	100
nSSR_1499	GCC	5|C6220502:754-1168|+	N/A	N/A	4|C4971288:197-208|-	5|C6010397:999-1013|-	N/A	4|C6801259:276-287|-	4|C5761655:257-268|+	0.49	0.38	0.99	GCACGAGGCCGGAACCCATGGCGCCGGGGCTTCTGCGACCGACCGCCTCCGGACGGCCGAGGAGGAGGTCGCCGCGGTGGCTTCGTCAGCGGGGATTCGCATATCAGGACCGTGAGTGATGCCAACTTTGGGTACCGTCAGGGGTTTCGAGGGGATGCTTGGGTTCCTCGAGGACCTCCATACCAACCCTTCCAGTGGCA	GCAAAATTTCGCACCTTTCCCGCCGCCGCAATTTAGTCAGCCTCCACCATACTATCGGCCATCTCCTCCATCCTTCAGGCGGCCAACCCCGCAACCTAAGCCACCGGATCACCGATATTGGGTTTTCTCCGAATCGCAACCCCCGCCCCAGTGTGGTAATTTTCCTTGATTTAAATCATTTCTTTGTTTTTTTTTTTTCA	CCTCGAGGACCTCCATACCA	60.106	20	100	100	TGCGATTCGGAGAAAACCCA	59.964	20	100	100	188	365	552	ACCGTGAGTGATGCCAACTT	59.891	20	100	100	GCGGGAAAGGTGCGAAATTT	60.039	20	100	97.5	130	308	437	GTACCGTCAGGGGTTTCGAG	60.109	20	100	100	GCGGGAAAGGTGCGAAATTT	60.039	20	100
nSSR_1505	GCG	5|scaffold8629:863-1277|+	5|C6228039:535-549|+	5|C5324184:1535-1549|-	N/A	5|C6046939:319-333|+	5|C6388622:857-871|+	4|C6810877:277-288|+	4|C5754843:1347-1358|-	0.45	0.12	1	GAGGCGTGGGGGCTTGATGTGGATCTAGGGTTTGGGGGATTGAGAGGCGTGGTATTGATGGTTCGCGCGGCGGGAGGGATCGGGGCTGGACAGGTTGGGGAAGATGCAAGGCTATGCATGGGCGGGAAGGTGAGGAGAGGAAGCGGCGGCAGCTACGGCACATGTTGCAGGTCCCCTCTGGCGCGGGCGCAGTAGACGCA	GCCAATTCGAAGCAGAATTCCAACGATTCCTTCGTAAAGGTGCCTCCTTCGTTTTATTTTTCATCGTGGTTTGTTGTTGATTTTTTAGATTAGGGTTTGGTGCTTTTCCTGCGATTGATTCCTGTGTTGATTGAAATACTTGATTTTGATTGAAATGATGAATTATATCAGAATTGAACGCCTTTGATTCATTATATGAA	CATGTTGCAGGTCCCCTCTG	60.679	20	100	100	GCAGGAAAAGCACCAAACCC	60.25	20	100	100	167	360	526	CATGTTGCAGGTCCCCTCTG	60.679	20	100	100	TCGCAGGAAAAGCACCAAAC	59.616	20	100	100	169	360	528	CATGTTGCAGGTCCCCTCTG	60.679	20	100	100	CGCAGGAAAAGCACCAAACC	60.597	20	100
nSSR_1506	GCG	7|C6056942:196-616|+	4|C6219085:932-943|+	4|C5287398:563-574|+	3|C5322674:604-612|-	N/A	4|C6239324:521-532|-	N/A	N/A	1.36	0.38	0.99	AGGGGAGCTCCGCGCCCGGGGTCGTGGATGATTTCGGTGACCACGCCCTTGAGGTATCCATTTCGCTCCCCGAAGTCGAGGCTCCGGAACCGCGCAGGGCCCTTGCGGTGGTGCGTGTGAGAGCGAAACACAGAGCCCGCTCCCTTTCGCTGCGCGCGAATCACGCGGCCCATCGCGGCGGCAGAATTTCGTCGACGTCA	AGGAAGGAGATAGAGGCCGGGGAGAAAAACAATATTTATATTAGAAACTGGTCTTACGTTGCCCTAGATTTCCCCGTGAATTGATTGATAGTCGGGCAATTCTGATGTTTAATCATGACCGTCCGATCATTGATTTGCAAAAGATTGATCTCTCTTTTTAAATTTTCATTTTTCATTCTCAAAAAAATACATATTATATT	GGCAGAATTTCGTCGACGTC	59.634	20	100	100	CACGGGGAAATCTAGGGCAA	59.745	20	100	100	120	374	493	GGCAGAATTTCGTCGACGTC	59.634	20	100	100	GGGGAAATCTAGGGCAACGT	59.745	20	100	100	117	374	490	GGCAGAATTTCGTCGACGTC	59.634	20	100	100	ACGGGGAAATCTAGGGCAAC	59.745	20	100
nSSR_1507	GCG	7|C6170055:995-1415|+	5|C5964370:189-203|-	5|C5180453:543-557|-	N/A	N/A	5|C6391914:230-244|-	N/A	5|C5751905:1591-1605|+	0.8	0.38	0.98	AATTCTTCGAATTCTTGGATCCAAAGTCGACTAACGACCCAAATGGATCTCCCTTCGTGGAACTCATCCCCGATCCAGCCGACCCTGTGGCCGATCTCATCGGCTGGCCCTGGCCGCCGCCCTTGGCGCCGATCGAGGAAAAACCGAAACCCGCGAGATTCTCCGCCGATCCCCAAGTAGACCTCATCGGCGAAGCGGTA	GTGTTGTTTGATGGAGGAACGTTGGTTTTGGGGAGCGAATTGGACAAGCTGCCGGTGGAGAAGGAGTTCTTTGAGGATTTGAGGGGGGCGTTGGAGGAGGATCGGGAGGAGCCGAGGGCTGGGCCGAGGAGATCGGAGAAGAGATTAGGGTTGGAAGCGGGGATGCCGATGCCAGAGGAGGAGGCGGCGGTAGAGGAGGT	GGAACTCATCCCCGATCCAG	59.605	20	100	100	GCTCCCCAAAACCAACGTTC	59.968	20	100	100	199	258	456	AAACCGAAACCCGCGAGATT	60.605	20	100	100	GCTCCCCAAAACCAACGTTC	59.968	20	100	100	117	340	456	AAAACCGAAACCCGCGAGAT	60.605	20	100	100	GCTCCCCAAAACCAACGTTC	59.968	20	100
nSSR_151	AAT	5|C5854318:12-426|+	4|C6244397:1807-1818|-	5|C5233551:585-599|+	N/A	6|C6088227:3179-3196|-	N/A	5|C7102958:967-981|-	5|C5761433:3362-3376|-	0.58	0.25	0.99	TATGGTTACTTTCTACCAAGGCAGTGAACAAAATATGTTACGATTTGCAATATCTATGCCATCTGAAAGAATTTGGCACATTGAAATTTTAACATTTGCATTTGATTTAGTTCACTTTGATGATGATTTTTAACCTAGTTAAGGGCGGTCTAGTTAGCATTCTCATTCTAACCATGTGCCATCCTTTGCAACAACAAAAA	AAATAAAGAAATACAAATAAAAACCCACATTCTATTTTTCTTTAAGAACAAATCAAACAGATCGAGCATATAATGTTTAGATACATAGCTTTTCAATTTTCTTTGTGAGGAAGTTAAATAATTCTCTGAAAATGTAAGTATTGGACGATTCACAATTAGCAAATGAAACTAACATAACAAAAATAATGATTTATTGCTAG	TGCCATCCTTTGCAACAACA	58.882	20	100	100	TGCTAATTGTGAATCGTCCA	55.079	20	100	100	200	187	386	ACCATGTGCCATCCTTTGCA	60.542	20	100	100	GCTCGATCTGTTTGATTTGTTC	56.35	22	100	100	112	181	292	CCATGTGCCATCCTTTGCAA	59.391	20	100	100	GCTCGATCTGTTTGATTTGTTC	56.35	22	100
nSSR_1512	GCT	6|C6060342:244-661|+	6|C6018364:482-499|-	10|C5247385:418-447|+	N/A	N/A	N/A	7|C7058384:363-383|-	7|C5739873:1171-1191|-	1.47	0.38	0.97	ATTGGTACACCCTGATGGCGTCGATGGAGTCACCGGACCTTTCGGCAGGGCCTGCAATGCTAAAACTCTATCGTTGAGTCTCAGTCGCCATTCTGATCTGTCTAATAACCTCGCCGCCGATGAAGTTTGTGAGCTCCCTACTAACAACACAAGCACCATCAATACCATCAATTCATCTCTTCCAAACTTGGCCATCTCTA	GTTGCTGCTGTTGTTGTTTGTCCTTCTCTTTCTAGCTAGTCTCAATGTGTTTATATAGATAGATAGAGAGAGAGTTCATGGATGTCTTAATTATGAATGAGTCATAGGTCTTATTTCACAGATGAGATCAATTCCAACAAAACTATCACGAAAAATTAGTATGGTCTTTGGACTAGACCTTATTAGTGAAAGTTCTGTGT	CTAATAACCTCGCCGCCGAT	60.039	20	100	100	GGACAAACAACAACAGCAGCA	60.135	21	100	88.1	140	301	440	CGTTGAGTCTCAGTCGCCAT	60.109	20	96.25	100	GGACAAACAACAACAGCAGCA	60.135	21	100	88.1	170	271	440	CGCCGATGAAGTTTGTGAGC	60.179	20	100	100	GGACAAACAACAACAGCAGCA	60.135	21	100
nSSR_1513	GCT	6|C6206874:511-928|+	6|C6044552:244-261|-	6|C5299648:1084-1101|+	N/A	6|C6038075:591-608|+	7|C6225672:456-476|+	7|C7131360:734-754|+	N/A	0.47	0.25	1	ATTTCATGCTCTGATCAAACTGCAGTTTAAGGAACAACAATGAACAAATCACCATTGAACACTTGATCAGAGCTTAATTTGCATGGATTTAATTATTTTTTCTCTCTAAAAAGGTGGCCGAGGGTGAGGCCATGGGAATGGATCATGGCTAAGGTGACCGCCGTTGTGAACTAGATTAGGTGGAAGGTTGAAGCTGGGAA	CTGGCAGACCTCCGGCGCCAGGGATACCCTGAAATTGGCCTTGTCCTTCACCCTCCTGAGCTAATTCTTCTTCACTGAGTGGCAACCTCTCATACGTCGCATTAGCGAAGGTGGCGGCCACCACCATGACCGGCCCTGCGGCGATGAGTGGCCCAACGACACTGCCTCCGACGACCTGTCCCTGCCCTCCGGACAAATAC	GACCGCCGTTGTGAACTAGA	60.039	20	100	100	CGACGTATGAGAGGTTGCCA	59.827	20	100	90	162	355	516	GTGGAAGGTTGAAGCTGGGA	59.89	20	100	100	CGACGTATGAGAGGTTGCCA	59.827	20	100	90	138	379	516	GACCGCCGTTGTGAACTAGA	60.039	20	100	100	GGGTGAAGGACAAGGCCAAT	60.252	20	100
nSSR_1517	GGA	5|C6052370:414-828|+	5|C6160657:807-821|+	5|C5337619:1959-1973|+	N/A	5|C5934871:230-244|-	6|C6380120:806-823|+	N/A	N/A	0.4	0.38	1	GTGGAGAGGAGGTACGCACCGTTTGTCCGGCGTGACGCTTACGGGACGATGGGGCGGGGACCAATCCCGACGGTGGAGAAGGTGCTGTTAGGGCTCGCGCTGGTGACGCTGGTGCCCATCCGGCTTGTGGTCGGGATCTTGATACTGGTTTCGTACTATTTGGTGTGTCGGTTTTGCACTCTGTTCTCGGATCCCAACCG	GCAGGAAGGCTACGCGCATATGGGTGGGTGGAGGAGGGATGTGGTGGTGCAATGCGGGAGGCTGTTCTCGAGAGCGATGCTGTTCAATCTAGGGTTTTATTGGATCAGCGAGTCTCGCCGGAGCCTTTGGGATGAGGTAACGAATCCTTGCTTCTTCTATGAGTATTGATCCTTGTGTTCTCTTGCTTTGAAATCGGATT	GCTTGTGGTCGGGATCTTGA	60.036	20	98.75	100	CCTCCTCCACCCACCCATAT	60.402	20	100	100	130	322	451	GGTGTGTCGGTTTTGCACTC	59.971	20	100	100	CATTGCACCACCACATCCCT	60.613	20	100	100	108	361	468	GCTTGTGGTCGGGATCTTGA	60.036	20	98.75	100	CATTGCACCACCACATCCCT	60.613	20	100
nSSR_1518	GGA	5|C6154273:835-1249|+	N/A	N/A	N/A	4|C6053425:467-478|+	4|C6234814:466-477|+	4|C7036860:387-398|-	4|C5309189:205-216|-	0.4	0.38	0.99	GCATGGAGGAGATGGCTCTCAATCCCAAGAAATCTCTAGTCATGCCATCACCTCCACCACCAATACCTCCATTAATGTTAACCTTCTGATCTCCACCTCCCATGGCTGAAGAAGAGATGGAAACCATTTGGCTTTGAGGCCTGCTCATTGTTGCACCCATTTGAGCTGCTTTTTGCAGCAATGCAGTGGCTGACAAGTGT	AGAGGAGAAGGAGAGATCATCTCTATGTGATTCAGCGCCCATGGTTGCTGTACTTGTTGAATCCCATGATGAAACTGATGAGAGATCTGATCAAGTGTTGATGATGAAGACGATGGTTGAGACAGAAGAAGAAGATGATGTTGTTGTTGTTGTTGTTGTTGTTGATTGTTTATAATCCCTGATCTTGCACTCTCTTCAGC	GCTTTGAGGCCTGCTCATTG	59.827	20	100	100	TGGGCGCTGAATCACATAGA	59.17	20	95	100	126	330	455	GCACCCATTTGAGCTGCTTT	59.681	20	100	100	TGGGCGCTGAATCACATAGA	59.17	20	95	100	104	352	455	CACCTCCCATGGCTGAAGAA	59.671	20	100	96.25	TGGGCGCTGAATCACATAGA	59.17	20	95
nSSR_1519	GGA	5|C6185754:1122-1536|+	N/A	N/A	5|C5196558:350-364|+	5|C6088275:893-907|-	4|C6370724:725-736|+	N/A	4|C5717809:316-327|-	0.49	0.38	0.99	TAACAATAGATCCGATCAACGATTGACAGGAAAGGAAGGGGTCGGAAGTTAGGCTTACGGAGAAGAGCCGGATCGAGAATGCGAGGACGCCAATGAGCAGGAGGATAAACAAGGCAAAGACACCGCCGAAGGCACTCCGTAGGTTGCCCGAGGGCGTGGTCTCAGGCGACGCCGCCATTGATGGCGGAGATCGAGGGCTG	GAAGAAGAGGAGGGAGAGAGATCGGGATGCGGAGGCGGAGACGGAGACTTATGTAGGGGTTTTCGTTCGAAAGTCCATCGAACCGGACCGGTCCGAGGAGAACCGAACCGAAATCGTTCTCATGAGACAAGTGTGTTACTGCTATTGGTGGGATGACATGTTTCGACATGGATTCCGCCAATCAAAAGAAATAGGTACCG	CCATTGATGGCGGAGATCGA	59.966	20	100	100	CCGGTTCGATGGACTTTCGA	60.109	20	100	100	127	374	500	CCATTGATGGCGGAGATCGA	59.966	20	100	100	TCCGGTTCGATGGACTTTCG	60.109	20	100	100	128	374	501	AAGAGCCGGATCGAGAATGC	60.25	20	100	100	GCATCCCGATCTCTCTCCCT	60.542	20	100
nSSR_1522	GGA	6|C6156527:817-1234|+	N/A	6|C5312688:740-757|-	4|C5303970:727-738|-	6|C6076155:894-911|-	N/A	N/A	4|C5400521:285-296|-	0.98	0.38	1	CTTTGGCTTCTTGTATTTCTGATCACACTTTATGCTCACAAAAAGACATGCTCAAAGACTTTGGGGTCGACGAACCTTTGATAAATTCCAGGGACAAAATACAATAGATAATAAAAAAGGCAAATTAAGAAAAAGAAAAAGATTTGATTCATTTTTATGTTTGAATGTACCTTTGGAGAGTGGAAGGAAGAAGAGTTGGT	GCAAAGATCAGGGAGACGATATTCATTCATGACCCAGTCAGTCTTACACCCTCTCGGAGCCCTTCCAGTGTAAAACACTAGTGTTTTCTTGAGTCCGATGAGCCTTTTCGGGTTGGTGGCACTACGAATAGGACGGTCGGAACCAGTGGCTTTCCAGAACCCTCGTTCAGTCGTCCGGTTTGGCCTACCACCATTAGCGT	ACCTTTGGAGAGTGGAAGGA	57.882	20	100	100	ACCAACCCGAAAAGGCTCAT	59.888	20	98.75	100	167	368	534	ACCTTTGGAGAGTGGAAGGA	57.882	20	100	100	TAGTGCCACCAACCCGAAAA	59.817	20	98.75	100	174	368	541	ACCTTTGGAGAGTGGAAGGA	57.882	20	100	100	GGTTCCGACCGTCCTATTCG	60.249	20	100
nSSR_1524	GGA	7|C6005924:128-548|+	2|C6152143:457-462|-	2|C5316036:671-676|-	2|C5352986:725-730|-	N/A	2|C6157376:246-251|-	N/A	N/A	2	0.38	0.99	TCCCCATCCTGCATCCCTCCGCCGCCGCCGCATGTTTGGCCGCGGCCTTGCCGATGACGCGCCAAAGGAATGCGCTGAATGCCTCCAGTTTGCTCCTCCTGCCGGACCCATGACTGCTTGCAGCTGCCTGCATCTCTTCAATGTCGTTCGCAGAGATGCAGTAAATGCGACTGATGGAATGATCATTGGAATGATCAGAG	GAAAGGGGGATCGGTAATGATGATAAAGGCATGTACAAATGGTCGAGGGACTCATCGTGGCAGCCCGGGCGGCGTGCGCTGAGTAGAGACCTTCGGAAGGATGGAACCACAGAGATGGGTTTCGCACCGGCGGCCTCCGCCCACGCCACCAGGAACATGTTGGCCGAGTACGCGTCGGTGATTCGGTGGTCGAACATGCA	CCTCCAGTTTGCTCCTCCTG	60.036	20	100	100	ACGATGAGTCCCTCGACCAT	60.396	20	100	100	198	208	405	ATGTCGTTCGCAGAGATGCA	60.109	20	97.5	100	ACGATGAGTCCCTCGACCAT	60.396	20	100	100	139	267	405	ATGTCGTTCGCAGAGATGCA	60.109	20	97.5	100	CTGTGGTTCCATCCTTCCGA	59.387	20	100
nSSR_1529	GGC	5|C6223052:777-1191|+	5|C6195185:332-346|+	5|C5324816:883-897|+	4|C5320500:627-638|+	5|C6043459:496-510|+	N/A	N/A	N/A	0.4	0.38	0.99	ACAACCTATACTTCTTCACCTTAACCCTAACTCTCCGATCTTCTTCCCCGCTTTCTCCTGGTGTCTCGCTTCCATCCGTCTCATTGCCCCATGTCTCATTCTCATCCAAGCCCGGATCCAACTCTCCGACATCAAAGTCCACCCTCATCGCCCCGTTCTCGTCCACAATACCAAACCTCTCCGGCAGCGGAGGAGGAGAA	GGTAAAGCAGGGAGAATTTCAGCGATGAGGGAAGCGATATCGATGGATAGGTTGCCGTTGGGGGAGAAGGCGATGGAGGATGAGGAGGCGAAGGAGGAGACGAAAGGACCAGGGCCATTGAAGAAGGGAAGCCGGGGTCTGCCGTCAGAGACGTGCTTTCCGATGAAGAAGGCGCCGATGCAGGCGAAGGCGATGACGAA	TCAAAGTCCACCCTCATCGC	60.036	20	100	100	CATCCTCCATCGCCTTCTCC	59.965	20	100	100	166	331	496	TCAAAGTCCACCCTCATCGC	60.036	20	100	100	CCTCATCCTCCATCGCCTTC	59.965	20	100	100	169	331	499	TCAAAGTCCACCCTCATCGC	60.036	20	100	100	CCCAACGGCAACCTATCCAT	60.107	20	100
nSSR_1534	GGT	5|C6159785:638-1052|+	8|C5778495:209-232|+	N/A	5|C5311812:483-497|-	N/A	N/A	5|C7076280:801-815|+	5|C5755569:1664-1678|-	1.2	0.38	1	TATGCAAAGTGTGATGAAATATGCAGGCAAGCTTAGACAAGTTGATGAGCCAAAGGTAAGCTAACATTCAGCATTTGAAATCTTGTTTCCTTTCAGATGGGATGCTAATCTTTCATTTGATGAACTATATTATCTTTCCATGAATATTATTCCACCAGATGATTGGCGACAAGAGTGGCGTCATCCTGAAAGACAATTCC	GGCGCTACCTGGGCATTTGAAGTTGCTGGTCAGACCATGGTCTGTCCAATTATTGTTGAGGACCTTAACCCTCCTGGTCAGATGCTAATTGAGGTAATAATACTCTTCCTTTGCCTCTGTATCTCTTGCTCACTATCTACTGGTTTTCAATTTTTTCCCTAAATATACTGCAGATGCTCTGCGAAGAGCACGGGTTCTTT	CCACCAGATGATTGGCGACA	60.393	20	100	100	TGGTCTGACCAGCAACTTCA	59.163	20	100	100	101	351	451	ACAAGAGTGGCGTCATCCTG	60.037	20	100	100	CCAGGAGGGTTAAGGTCCTC	58.795	20	100	100	124	368	491	CAAGAGTGGCGTCATCCTGA	59.753	20	100	100	CCAGGAGGGTTAAGGTCCTC	58.795	20	100
nSSR_1535	GGT	5|C6172513:796-1210|+	4|C6133083:462-473|-	N/A	N/A	4|C6018851:787-798|-	4|C6356638:835-846|+	4|C6722059:218-229|-	N/A	0.4	0.38	0.98	AGATGACAATCAAAAGCCAATCTCAAGGCAAATCAACGGTGGATTCATGCATCACCATGTACGGTGTACTCGCACCCTCCTCATCTGAAAACGTGTAACCCTGCCGTTGTTTTCCAATGTTTTCCACGCTTGAAAACTTGAAGATATAAATTGCCAAGAGAAGAGGGTTGGCAAGTTAATTGGTAATTCCAATGGAGTGG	GGAGGGGTGTTGCCGGCGAGGTGGTGTGAAGAGAGTGGGGACTCAGAGGAGGTGTATGAAGAAGGTGAAGGCATGGGTACTGATCAAGGTGATCATGAAGATGATGCAGAGTCATGCACTGGTGGAGATGAGGAGGAGGAGGAGGAGGAGATGATGGGGAATGGAAAGGAGAGGAGTTCAACAATGGATAATGGTTGGAG	CGCACCCTCCTCATCTGAAA	59.75	20	94.78	96.25	CCCCACTCTCTTCACACCAC	59.965	20	100	100	185	270	454	TACTCGCACCCTCCTCATCT	59.741	20	96.25	88.75	CCCCACTCTCTTCACACCAC	59.965	20	100	100	189	266	454	CGCACCCTCCTCATCTGAAA	59.75	20	94.78	96.25	TCCCCACTCTCTTCACACCA	60.105	20	100
nSSR_1536	GGT	5|C6191764:367-781|+	5|C6185031:540-554|+	N/A	5|C5384868:1232-1246|-	N/A	5|C6381012:1393-1407|+	5|C6944540:319-333|-	7|C5607007:406-426|+	0.75	0.25	1	TGCAGTGTGGACTTGCCACCATCATCCTCTACACTGGCTGGTACTCCTCCCTCACTCTTCTCTAATTTCTTATTCCCACAATGCCCAACAGGCTTCTTCAATCCTAGAAATTCCTTCCACTTGATAGACTTGGCCGGCCTTGTTGAAGAGGCCCATGGATTGGCATGGTCTTCATCACTGGCGAGCAGCTCTTGACGTAG	GGGTCTTGGAATGGTGCAGCTCTCTCTGAGTGGCACTAATCTCCCCTTGAAGAACAACTCATCGGCTGCCATCATCGGCCGGCTCCCGACGGAGAACTCGAAGTTTGGGTCCCCCGGAGAGGCTGAATGCTTTGGTACCGATGAAATCCCGGCCTGTTCGACCACAAAGTCATTGGAGAAGGAGATCCTTGGGCTCATGG	CCCATGGATTGGCATGGTCT	60.106	20	100	100	ATGATGGCAGCCGATGAGTT	59.818	20	100	100	139	351	489	TCTTCATCACTGGCGAGCAG	60.108	20	100	100	ATGATGGCAGCCGATGAGTT	59.818	20	100	100	122	368	489	CCCATGGATTGGCATGGTCT	60.106	20	100	100	GATGATGGCAGCCGATGAGT	60.25	20	100
nSSR_1539	GGT	6|C6193096:1239-1656|+	5|C6209417:1309-1323|+	N/A	3|C5395086:310-318|-	N/A	5|C6275016:622-636|-	4|C6904312:185-196|+	N/A	1.02	0.38	0.97	AACAAACCTCGTTCCTGGACTTCCACCTGATCAGCTCCAGTTACCTCCACATGCTGATGCTCCTGATCTGCCATATTAAAAAACAACTGATTTGAGAGAACTTGTTTTTGAGATCTGGTCGGTTTGCAGGTGAGTGATAGAATGAGAGAAGATCAGTGGGGAGGGTGTTATATATAGACTACTGATTAACTTAGATGCAA	CAAGCGACGTGCGATACGCGTTACCAAGGCGATCAAGTAAAGGATAATAAAGAAAAGAATAAAATAAAAGAGAGAGTGGGTCCCTTGCACTCCTGCAACCGACTTAGAATGTGGGACCCAAGGGGGCATAATTATTAAAGGAAAGAATTAAAGCTGGATGAAGACCTGGAGGGATGTGTCACCTTGCCTTGCCGACAACC	AGATCAGTGGGGAGGGTGTT	60.179	20	100	100	ATCGCCTTGGTAACGCGTAT	59.896	20	100	100	102	349	450	AAGATCAGTGGGGAGGGTGT	60.179	20	100	100	ATCGCCTTGGTAACGCGTAT	59.896	20	100	100	103	348	450	TGCTGATGCTCCTGATCTGC	60.179	20	100	100	ATCGCCTTGGTAACGCGTAT	59.896	20	100
nSSR_154	AAT	5|C5974294:252-666|+	3|C6147069:569-577|-	5|C4970780:263-277|+	N/A	N/A	3|C6381608:1054-1062|+	5|C7048274:529-543|+	N/A	0.98	0.38	0.99	TCTTGCCTGCTTTCATCCATGTTTAGATCACACATTCCATGAGAAAATCAAATGATAATTGTACTTAAATTGAATTATTTGGAATACCCAGGAGCCTCCTCCTCGAACATGAACGACCGCAGCTCTCTCCCATCCTCCGACCTCATCACCATCCTGCAAACAGCTGACGCCATTAAGGATATCAGAAGAAAAACATAAGA	AACATCAAAGAGAAAAATGAAGAATTAGGGTTTCTATCCACCCTTGAATCGGGAGGAATTGGCTCCTGAGCTCGTCCCCAACTCCGATGGCGTCTAGCACGCGCCACCCGTTCTTGAACAGCGTCAGCGAGGTCCCTCCCGTCCGGAGCGACTCCCCCTGCTCCAGCAATAGCGAGCGGACACCCAACCTACTCCCACGA	TCCGACCTCATCACCATCCT	60.032	20	100	100	GGAGCCAATTCCTCCCGATT	59.816	20	100	100	146	335	480	TCCTCCGACCTCATCACCAT	60.032	20	100	100	GGAGCCAATTCCTCCCGATT	59.816	20	100	100	149	332	480	ATCCTCCGACCTCATCACCA	60.032	20	100	100	GGAGCCAATTCCTCCCGATT	59.816	20	100
nSSR_1549	GT	6|C6109664:629-1040|+	N/A	6|C5256758:565-576|+	N/A	5|C6074625:651-660|-	6|C6395910:1118-1129|-	7|C7117690:1242-1255|+	7|C5682741:659-672|+	0.69	0.25	0.99	AATGAGGTCAGTCAACTTTTCTGAAGCATTGCAGTACTGATGTTGGGTGTATGCATCTTCTAATCAGAGGGTGTGTTGGAAAAATGATTAGAAGCAGCCAACCTAGTGGAGTGCATGGATTACGTGGGTGAGTTGAGTCAAAGTGTCAGTTAGTCATGTGTGTGTTAGTGGGCAGTTAGTGTAATATAGTTTATGTGTAC	AATGGGTTGTGTGATGGGTATCATGCATGGTGTGTTAGTTATGTTAATGTTCTTTATATTCTGCTGAAATAGTTTGTAATGGTTGTGTAGCTGTGAAATGTTATTCTGAATTTAGAGAATTGTCTTCATCTCCTTGTTTTATCCTTCTCCTTGAGTGTAATTCTTCTCTACAAGTTCTAACATTTCCATGGTTTTTTTTA	GCCAACCTAGTGGAGTGCAT	60.035	20	100	100	ACACACCATGCATGATACCCA	59.716	21	100	100	151	296	446	GAAGCAGCCAACCTAGTGGA	59.675	20	100	100	ACACACCATGCATGATACCCA	59.716	21	100	100	157	290	446	AAGCAGCCAACCTAGTGGAG	59.674	20	100	100	ACACACCATGCATGATACCCA	59.716	21	100
nSSR_1550	GT	6|C6135467:689-1100|+	6|C6101991:556-567|+	6|C5328090:825-836|+	5|C5305096:458-467|+	6|C6088005:3266-3277|+	6|C6401564:2765-2776|+	N/A	N/A	0.37	0.25	1	TTACTCCGAACTCTTAGTTTTATTGTCCGACTCCCACAAGTAACCTTTTCAGATGAATGGCGATTAGAGATTGAACTTGAATCATGACATCTTCATAAAAAGCAGAAAACTAGAATTTAGTAGTTAATTACAAGAACACAAGAAAGTTAAACAAAAGGTCTAATTAAATTGGTAACAACTTAATAAGTGCCATCTGAGGG	AGTACTTTTCCTTTTCTTAAACATGTTTCTGCAAATATTAGTGCTCACTAATAATAACAATTGTCACGACTAAGATGGACTATTTGCTTCAACAAACAAGTACTATGTAGAAGGACATGCTTGGCTCATTCATAAAGTCACCTTTAATGCCACTTGCAGAATAAAGAATTTTTGGTACAGTTACGTCTTTCAGGTACTTC	CAACTTAATAAGTGCCATCTGAGG	57.631	24	100	100	TGAGCCAAGCATGTCCTTCT	59.305	20	100	100	165	375	539	ACTTAATAAGTGCCATCTGAGG	55.598	22	100	100	TGAGCCAAGCATGTCCTTCT	59.305	20	100	100	163	377	539	CAACTTAATAAGTGCCATCTGAGG	57.631	24	100	100	TGAATGAGCCAAGCATGTCCT	59.995	21	100
nSSR_1554	GT	6|C6168355:985-1396|+	6|C6071710:304-315|+	6|C5316734:371-382|+	6|C5369376:276-287|+	N/A	3|C6091620:286-291|-	6|C6959030:414-425|+	N/A	1.12	0.25	1	AACATTGAGAGATAGCAGCTGCTTGGAACTGGATGATGTTTCTCCATTGAAGAACAGCAGCTTAATTTCCTGGTACATTGGAGAACTATGACACCATATAAAATTAGTCTATCATTCAGAAAAAAGATAAATAAAAAGGATGTGAAACTGCCATATGTTCAGTGAGAGAGTTGTTGAGGAGAACTGTTCATAATGCCTAG	CTCTCTTTGTATTAGCATGTGAAAGATGATGATGTTTCTGTATATATTGAAAAGATTCCCAAATTAATAAAAAAGGCAACACCATGATCATGCAGCAAATCATTAATAACAAACAAGGCTATTGTGAGAGTTTGAAAACTCTAATAATAAGTTTCTGAAAAAGACTTGCTAAATGAAAACACAACATTAACAAGTGCTGG	TCAGTGAGAGAGTTGTTGAGGA	58.434	22	100	100	TGCATGATCATGGTGTTGCC	59.181	20	100	100	148	358	505	CAGTGAGAGAGTTGTTGAGGAGA	59.428	23	100	100	TGCATGATCATGGTGTTGCC	59.181	20	100	100	147	359	505	TCAGTGAGAGAGTTGTTGAGGAG	59.428	23	100	100	TGCATGATCATGGTGTTGCC	59.181	20	100
nSSR_1558	GT	6|C6196746:718-1129|+	N/A	6|C5297038:657-668|+	N/A	5|C6079907:375-384|+	5|C6303550:661-670|-	N/A	5|C5708981:362-371|-	0.49	0.38	0.99	TCGAACTTGAGTTAAATTCGAACCACCGTTGTTTTAATGAATTTTGAGCCGAATTCAAACTAGATCAGACTCAACCGAACACAAGCAAACACGGTTGATAACAAGTGTGATTTTGAGCCGAATCAAACAAATTACATGCTTAATTAGTTCAATAAGTAGTATGTGATTAGTTTAATTTTATAAAAATAAAAATCCTACGA	TGAAAGGGATGAGCACCGAGAGCTAGAGCGCACTGAGATGTCCCAATCACATGAGTTGTACATGCATGAAGGATTCATGATACTTGGGTCAAATGTTTTCCTTCTTCAATTGCGGCCAAAGCAAACATTTTGTAATACTTATCATTAAATACTGAATGTTATTAAGGAAGTTGACTTGTGACATATTATAATCGTCTTTA	CGAACACAAGCAAACACGGT	59.902	20	100	100	CTCAGTGCGCTCTAGCTCTC	59.971	20	97.35	96.25	174	275	448	ACCGAACACAAGCAAACACG	59.902	20	100	92.5	CTCAGTGCGCTCTAGCTCTC	59.971	20	97.35	96.25	176	273	448	CGAACACAAGCAAACACGGT	59.902	20	100	100	ACATCTCAGTGCGCTCTAGC	59.898	20	100
nSSR_1559	GT	6|C6199446:730-1141|+	5|C6190355:1067-1076|-	6|C5312466:259-270|-	N/A	6|C6076417:1575-1586|+	N/A	5|C7037192:243-252|+	N/A	0.49	0.38	1	TCCTGCTTATTTCTCTCTATATTTCATCAATCCAAGCACACCATTAGTGGGAATAATGTCCTGATATGCACCTTTAGCAGCACTACTTTGCTTGGAGTGTTTGTGACAATTGAAGAAAAATGAAACTGTTATGGATGTTCTTGTTTTATCTATCAATGTCGTTATCTGCTTTGTTTGCTTCGACAACATTGATATGGTTA	GCGCGTGCATCTACGTGGATTGTCTAGAATTTTTTATGTGTTTATGGGTTAGAAGTCAGAATGCTTTGCCATATTGTTTAGATATGAATTTGTATGTATTAGTATTTGATGATAAACTAGTTTGCTAATGCGATTTCATTAAAATGACAGCATTGCAGGAGGCGAATGACAAACTTTTGCTCGCAGCTCGTAGAGTCAGG	TGCACCTTTAGCAGCACTACT	59.652	21	100	100	AGACAATCCACGTAGATGCAC	58.106	21	98.8	100	171	266	436	TGCACCTTTAGCAGCACTACT	59.652	21	100	100	AGACAATCCACGTAGATGCA	56.651	20	98.75	100	171	266	436	TGCACCTTTAGCAGCACTAC	58.192	20	100	100	AGACAATCCACGTAGATGCAC	58.106	21	98.8
nSSR_1560	GT	6|C6201648:792-1203|+	6|C6079328:617-628|+	7|C5161015:513-526|+	6|C5229490:397-408|+	6|C6086821:871-882|-	N/A	N/A	N/A	0.4	0.38	0.98	CATACTAAAGGTAAACATGACATAAATTAAGGAGGAAGATAAAATAAAGATCATAAACTTCGTGGAATGATGTCTCCTTCGCCTTCCATTTCTCTGTGAAGCCCTAGTCGTCGATAGAAGGTTCGCCAAAAGTCCCTTGATAATTAGATCTGACGAACTTTTATAAGTTTTGATTTTATGCCACACAGGCGTGTTTGGGG	GAATGTGTGCCGCTTTGGAGTCTTTTGGAACTGCTTTAATGCAGTTTCAACGCATACACGGTCTTGTACACGGTCGTGCATACGCTCGTATCACTTGGTACATGGTCGTGTCATCTGACACACGGTCATGTTATCTGACATACCATCTTGTCAGAGAATTCTGGGGTGCTCTTGAATTATTCATCTTTTAAATCCACATG	AGGTTCGCCAAAAGTCCCTT	59.815	20	100	76.25	GACCGTGTACAAGACCGTGT	59.969	20	100	97.5	169	318	486	AAGGTTCGCCAAAAGTCCCT	59.815	20	100	71.25	GACCGTGTACAAGACCGTGT	59.969	20	100	97.5	170	317	486	GGTTCGCCAAAAGTCCCTTG	59.686	20	100	81.25	GACCGTGTACAAGACCGTGT	59.969	20	100
nSSR_1561	GT	6|C6210778:1748-2159|+	6|C6181849:839-850|-	6|C5308028:474-485|+	N/A	6|C6036107:398-409|-	N/A	N/A	5|C5730933:462-471|-	0.4	0.38	1	CTTGCCACCTTGAACCCTTGGCCATCCTGTATAAGCTAAGCCTTAAGGGAAAGCATAGCAAAGCCAATTCTCTTTTGAAAAATATACAAAAATTATAAATAAATAAATAAAAGTTTGATAATTCAGTTACAGTAATTTCAAAAGAAAGGATTCTACAATTGAATGATATATCTTAGAACAAAATAATGTACCTTATAGGG	ATCCATGTCCATTGGTGCATGCATGATTTGGCCTCTAACAATGTTTCTTACATCTCTTACATAGATAGGACAACCACATGCAAAGGCATATACTTTTTGCTTCTACTTAAATTTAAATGTAAGATTGCTCCTAAAAATCAAAGCAAAGAAGCTTTGATTACAAAAAAATTGCTAGTTGATTATAAGGAAGTTTATTATAC	GGGAAAGCATAGCAAAGCCA	58.815	20	100	100	GCCAAATCATGCATGCACCA	60.108	20	100	100	198	246	443	GGGAAAGCATAGCAAAGCCA	58.815	20	100	100	AGGCCAAATCATGCATGCAC	59.823	20	100	100	200	246	445	GGGAAAGCATAGCAAAGCCA	58.815	20	100	100	GCATGCACCAATGGACATGG	60.179	20	100
nSSR_1562	GT	6|C6213402:763-1174|+	6|C6238051:1749-1760|+	N/A	6|C5391636:1492-1503|+	6|C5779413:203-214|-	5|C6285520:489-498|+	6|C6958806:334-345|-	N/A	0.37	0.25	1	ATGTTATTAAGTACCACTAACTTCAAGTCAAATTTCAGTTCCTTCTATTTCCCTCATCCCCAACATAATCTAACTACTACCATTTCAAGACCACAGTATCTCAACCAAAACTTTGGTTGGAGCTGACACAGGAAGTTCAGAGCAAATTCAGGATGCAAACAAACTTGCAATTTAGACCCAGGTGGTTGGAGATCGCGCGC	GAACCACAGGCATGTGGGTTACATAAGAATAATCCAAAAAATGTTGGGCTAACTCCAGGTCAGTGTATGCCATGGCCAAGATTGCTATGATGTTAACAGATGCATACTCACAGAATCAAATGTTTCCAGAGGCAAACTTTCTAAATGTCGCCGGATGACAGCATTTCCCTCCTTATGGATAAGTCGGATGTTGGTCAGTC	GGTTGGAGCTGACACAGGAA	59.891	20	100	100	TAGCAATCTTGGCCATGGCA	60.033	20	100	100	185	314	498	TTGGTTGGAGCTGACACAGG	60.179	20	100	100	TAGCAATCTTGGCCATGGCA	60.033	20	100	100	187	312	498	GGTTGGAGCTGACACAGGAA	59.891	20	100	100	GCCATGGCATACACTGACCT	60.107	20	100
nSSR_1563	GT	6|C6217842:2333-2744|+	6|C6198315:314-325|-	6|C5315642:968-979|+	N/A	4|C6081357:1229-1236|-	N/A	N/A	6|C5747009:1273-1284|+	0.8	0.38	1	CTGGATCTTGTGAGGAAGGTGCGGGAAGCTGTCCTTGTGGAGAAAATACAGGTGCAGACCTTCCAGTCCTCTTGGGAAACACCACTCCATAACGCTGGCATAAATAACAATTACTTTAGGACTGGAAAACTGAATTTGCAAAATTTAAAAAATATGACAAACTCAAATTATTGTCTAAATTTTAACAATTGCAGATCCTA	GAACATAAAAAGTCTACATACCAACAACTCTTGATATGCAGCATAATATTGTGTATGTCTACCATGAGGACCTCCAAATGCCTCTTGCCAAGTATCAATTAGTACCAAAATCTTCTCCTTGACACGAAAATCAGGCTGCCATATTTGAGAAAAGCAAATAATCAGTTAAAGGTACTAATATGAATCCAGGTGACGGAAGG	ACCTTCCAGTCCTCTTGGGA	59.806	20	100	100	TGCTGCATATCAAGAGTTGTTGG	59.559	23	100	100	198	257	454	ACCTTCCAGTCCTCTTGGGA	59.806	20	100	100	GCTGCATATCAAGAGTTGTTGGT	59.558	23	100	100	197	257	453	CCACTCCATAACGCTGGCAT	60.464	20	100	97.5	TGCTGCATATCAAGAGTTGTTGG	59.559	23	100
nSSR_1567	GT	7|C6168211:712-1125|+	7|C6238647:922-935|+	7|C5054633:373-386|+	N/A	8|C5998857:617-632|+	N/A	N/A	6|C5720079:356-367|-	0.63	0.38	0.99	ACTTGAAGCTAGCTTTGAGATAATTTGTAGTTGTGGTTGTAGGGATGCAGAGGGAGTTGCTAGGAGTGATCTACTTATATAGAGGAGGATGTGGGGGGTGTCATTAAGAGGAAGGAGAGGTGAGGGAATAAGGGATGACTTAGTACCTCTTAGAGCCACACAATGAAATTGAGGACATTGAGTATTAATGATCAAAGGGA	ATGGAGGTGTTTCTTCATCTATCTCTCTTTCAAGTTGTTCTTTTCAAGCATAAAGCTTTCCTAGCTCTTTCCCACTTCATCTTTCTTAAGGCAATTTTATTCATTTTTATTTTGTTGTTGGTGTTGTTGTTTCAATAGTGTAAATGCTCATTGGTTATGTGATATTAATTAAGAGAGAACTATTGGTAATTATATAAATA	GAGGAAGGAGAGGTGAGGGA	59.663	20	100	100	TGAAGTGGGAAAGAGCTAGGA	58.097	21	100	100	186	307	492	GAGGAAGGAGAGGTGAGGGA	59.663	20	100	100	TGAAGTGGGAAAGAGCTAGGAA	58.752	22	100	100	186	307	492	AGGAAGGAGAGGTGAGGGAA	59.206	20	100	100	TGAAGTGGGAAAGAGCTAGGA	58.097	21	100
nSSR_1571	GT	7|C6204792:1056-1469|+	10|C6002504:431-450|+	13|C5023001:289-314|+	N/A	9|C6064987:428-445|+	N/A	7|C7101118:684-697|-	14|C5402895:237-264|-	2.71	0.25	0.99	TTTCCTTCAAACAAAGAGGGCATATGCCCACAACTGCTTGTTTTGGATGGAAGTAACAACATGATGAGCTATCTTCTCTGTAGAAATTCATGTTTTTGTGTAGCTTCAAAGGCACAAAATGAATGGAGGAAGGAGAAGAGGAGAGTTGATGAAGATGAAGGCATGAGCACAAGTAGAGATGTGGATTTATATATATGTGA	TTGTGTGTGTAGGGTTTTCTCTTATGGATGGGAGCTTGTTTTCTTTGAAAGAGAGTTATGAACATGCACCACAAGGGAGACCATCTAGATCACATCTATTGGCTTGGATTTATTTATTTTTATTGAAGTTATAAAATTATATATAGGGAAAAAAAATCAATTGATATGATTCAACTAAGGGTTTAAGAGGTAGATGAAAG	TGGAGGAAGGAGAAGAGGAGA	58.996	21	100	100	TCCCTTGTGGTGCATGTTCA	59.815	20	100	100	169	323	491	GGAGGAAGGAGAAGAGGAGAGT	60.024	22	100	99.09	TCCCTTGTGGTGCATGTTCA	59.815	20	100	100	168	324	491	TGGAGGAAGGAGAAGAGGAGAG	60.024	22	100	100	TCCCTTGTGGTGCATGTTCA	59.815	20	100
nSSR_1572	GT	7|C6214250:895-1308|+	6|C6134925:493-504|-	6|C5258134:773-784|-	N/A	6|C5870192:254-265|+	N/A	6|C7101604:622-633|-	6|C5653855:296-307|+	0.37	0.25	0.98	GTATCCAAAAGGATCCACAACTTGTCCAACCCTAGACCCAACAAAACATATATATTACAACCAAATAATAGAGCATGCATTACAAGAAAATAAAGTTAAGGAACATAAATTACTAATTAGCACCAACAAGAAGTAGATATACACAATGCAAAAGAGAATTATTTTATGATAACTTTTAAGTTGTAGTCATGCACAACTTA	CACCTGGTTCTGGGCTTATCTCTTGTTTATTATGTGTTTGATCACGGCCCTCTGTTTTTCCGCATGGAGGAGCACATGTCCAGAGGCTTAATCCAAAAGAAAGAGTGGTAACAGGATTTTAGTTCAATCTCTCTTGAGCTTTATTTTAGAAGGATATCCTTCTCTAGGTTGTGACATTGGTCCAACAATCTCGCAATCAT	AGCACCAACAAGAAGTAGAT	54.27	20	96	100	TAAGCCTCTGGACATGTGCT	58.721	20	96	100	186	318	503	AGCACCAACAAGAAGTAGAT	54.27	20	96	100	GGGCCGTGATCAAACACATA	58.255	20	100	100	146	318	463	AGCACCAACAAGAAGTAGAT	54.27	20	96	100	GAGATAAGCCCAGAACCAGGT	59.159	21	96.16
nSSR_1574	GT	7|C6219416:1561-1974|+	N/A	7|C5336715:1164-1177|-	7|C5322412:472-485|-	7|C6043003:405-418|-	7|C6400940:1643-1656|-	14|C7088298:240-267|-	N/A	2.61	0.25	1	CTGGTATGGGTATGGAGGCAAGCTTAGGCTACTGCAAAGGATTGCCTACATTAATGCTACTATTTATCCCCTCACTTCAATTCCTATGGTCATCTATTGCACTATACCAGCCATTTGCCTTATCACAGGACGATTCATTATCCCAATGGTATGTGCAGATATCATTCTTTAACTGAATGTAGAAAATATAGCAAATTCGA	TTCCGTTTCTATATTGCATTTATGTTGACAATCCTTCTGATATCTTATAACTGCAGATAAGTAGATTTGGGAGCATCTGGTTTCTACTAACCTTTTCCTCCATCTTTTCCACTGGGGTTCTTGAAATGAGATGGAGTGGCGTTGGGGCCTTAGAATGGTGGAGAAACCAGCAATTTTGGGTGATAGGCGGGGTTTCGTCG	GCACTATACCAGCCATTTGCC	59.662	21	100	100	ACCAGATGCTCCCAAATCTACT	58.881	22	100	100	197	298	494	GCACTATACCAGCCATTTGCC	59.662	21	100	100	AACCAGATGCTCCCAAATCT	56.788	20	100	100	198	298	495	AGCCATTTGCCTTATCACAGGA	60.025	22	100	100	AGTAGAAACCAGATGCTCCCA	58.449	21	100
nSSR_1576	GT	8|C6084964:513-928|+	N/A	N/A	N/A	8|C6060591:1538-1553|+	7|C6157304:253-266|-	5|C7101980:955-964|+	5|C5728363:421-430|-	1.36	0.38	0.98	AGAAATTTAAGAGGAACAAAATGGGAAAATATGCAACTATTTAAACATAATTCATAAAGATGCCTTTCATAATTCTGCAAGTGAAAATTTCTTATAAAGTGAAATTCAATTGATATTTATTCTCCAAAAATGAAGCATTCATCAAGTTAAGAAGGTTAAATGAAAACTGCAAATCAATCAAACAAAAGATGCCAAAGAAA	AGGCGCAGGCATGCGTAACATGCACATTTCTGGAAGGAATCATCATAAACTTGGTAGGATATGCATTACCTCTGCTAGAGATTCAATGTCCCTCGTTGAAGAAGAGCTCAGTGGATCTTCTTTGTTTGTCTCTACATTAAAAACTTCCTTGAAGGTCTCTTCTTTGATGTCAGAAGAACCCTCCTCTTGCATTTTTTTCT	GCCTTTCATAATTCTGCAAGTG	56.299	22	100	90.91	CCAGAAATGTGCATGTTACGCA	60.095	22	100	100	188	261	448	GCCTTTCATAATTCTGCAAGTG	56.299	22	100	90.91	TCCAGAAATGTGCATGTTACGC	59.839	22	100	100	189	261	449	GCCTTTCATAATTCTGCAAGTG	56.299	22	100	90.91	CCAGAAATGTGCATGTTACGC	58.481	21	100
nSSR_1577	GT	8|C6102128:491-906|+	N/A	8|C5319192:1073-1088|-	8|C5342260:877-892|-	8|C5831196:241-256|-	7|C6393864:935-948|+	N/A	N/A	0.4	0.38	1	TAGGCTGTTTTGTTAGGAAACTAATTTGCTTTACAGTCAGTGTATGCTTAACAAAGATTTGCTACAGACAATAACCACTGCAATGCCTGCTTTTCATTTGCCACTTAACTTTTCACTACACTTGCATACTATGGTTTTCAGAGGTCTATTTTTCAGAACAATGTCATGCTTCCCATCTTTGGAGTGTGTACATTCTGTGC	TATCCAATCTGTGGTTATTTAAATACCTAGAGATTCGAGAAGGCAATATTAATCTAATTGAAAGGTTTCAATTGCAAGCAACAACCATTCATCTGCGCAAGTATAGTAATGTCATCTGTTTTTTATATTTAAGTTAGTTGTCTAAAGGTTCTTTTCATGGTGGTCTCTAGGGTCCCTTGGCTTTAAAAGCCCAAACCATT	TGCTTCCCATCTTTGGAGTGT	59.575	21	100	100	TGCGCAGATGAATGGTTGTTG	60.068	21	100	100	149	366	514	TGCTTCCCATCTTTGGAGTGT	59.575	21	100	100	CGCAGATGAATGGTTGTTGCT	59.799	21	100	100	147	366	512	TGCTTCCCATCTTTGGAGTGT	59.575	21	100	100	CTTGCGCAGATGAATGGTTGT	59.799	21	100
nSSR_1578	GT	8|C6105832:57-472|+	N/A	9|C5164109:249-266|+	8|C5018358:242-257|+	8|C5876030:494-509|-	N/A	12|C7010168:618-641|-	N/A	1.55	0.38	0.99	AAAGGAATGCAGTATTGGCTTACAAGAAAGATTTCTATTTCCAAGGTAAGAATCCCTATGGACTAATATATGAAAACGAATGCAGTACCTTCCTCCGACTGATTCTAGAGGACCTCCAACAACATATACTTCTTGCTCTTGGTTCCAGACTCCTGCAAAGAAAAACAACAATGTAAATGTGTGTGTGTATGTGTGAACGA	TGTTAAGAAGAAAATAGTTTTACTTACAGGTTCTCTATTTCGAGCTTTTCAGCAATGGAGATGGGCTTGTGTCTAGACCATCCACTTTGCAGTGCATTTCCCTTTGACTGCTGAATGATTTGAGCAAGGGATACTTTTCCTCTAACTAAGCTCAGTGACTGATTTTGTTTGCCATTCTCTCTTCTCTGGGCCTGTGACGT	CTTGGTTCCAGACTCCTGCA	59.602	20	100	90	GCACTGCAAAGTGGATGGTC	59.758	20	100	100	174	193	366	CTTGGTTCCAGACTCCTGCA	59.602	20	100	90	ACAAGCCCATCTCCATTGCT	59.666	20	100	100	149	193	341	CTTGGTTCCAGACTCCTGCA	59.602	20	100	90	CACAAGCCCATCTCCATTGC	59.541	20	100
nSSR_158	AAT	5|C6043434:309-723|+	5|C6231267:1248-1262|-	5|C5332609:599-613|+	5|C5250868:375-389|+	6|C5695055:186-203|+	N/A	N/A	N/A	0.4	0.38	0.98	AGATGTTAGAAAAAAAAAAGAATGCAAAGTGGGGAGTGATTGAGATGCTGTTGGATGGAGAGAAGGGAAAAGAAGAATAAGGAGAACACTCCACATGCAAAGGACAAAAGCCTAAGAACCCTTTAAAGGTGTGCATGCACTCTCTGGTGGCCTCTCCTCCAAAGCAAAGCAAAGCAAAGCAATGGCCAGTACTGTTCAAG	AGGACATCATCCATCATGTAAGATATATATATAACACCAACTTTTTGGCAATTAGGGAGGGGGCTCTGGTCAAATGCTAATCAGTAATCACCTTTCACCCATTTTAGGCATTTAATCATTCTTTATTTTAACCTAAGAGCTTAAGATGTGGTCATAGGCTTGTAAAGCAGTATGATGTTATCATTGAAATCAGACCAAGT	GGCCTCTCCTCCAAAGCAAA	60.251	20	100	100	CCCCTCCCTAATTGCCAAAA	57.754	20	100	100	129	348	476	AGGTGTGCATGCACTCTCTG	60.321	20	100	100	CCCCTCCCTAATTGCCAAAA	57.754	20	100	100	151	326	476	AAGGTGTGCATGCACTCTCT	59.601	20	100	100	CCCCTCCCTAATTGCCAAAA	57.754	20	100
nSSR_1584	GT	8|C6188118:918-1333|+	8|C6120123:522-537|-	8|C5281936:193-208|-	N/A	8|scaffold20632:1160-1175|-	10|C6341992:293-312|-	5|C7041710:744-753|-	N/A	1.46	0.25	0.99	CGAGAGGTTTTGATAAATAAACATGCATACAAATAATGAGAATAGATACTAAGTTTTAGTTAGATGACAGTGAGAAGAGGTCTCGTGTTTAGTTTGTTATTTATTGAGGTTTGATGAAGGTATGGGTTGTTCTCATATTTTATGCAAATTGGGTTAATCTCCAGGTATGTATGGTGGGTTGTGGGGGTAGTGATGATTAA	GGCTAGGTTAGATGGATTATATTATTGTCTTTATATGGACATGTTAGAGGTTGGGACTCCAAAGTGCTTTTGATTGGTAGATGCTTAAGATTTGATAATCAGTAAGTGCATTTTGGAAAGATGGCATGCCGATTAATGTTAGAGGATTAATACTGAATACATAGTTTCAGTCATGGATTGAGTGAGGGTAACCAATGGCT	TCTCCAGGTATGTATGGTGGGT	60.022	22	100	100	ATCGGCATGCCATCTTTCCA	60.107	20	100	89	192	357	548	TCTCCAGGTATGTATGGTGGGT	60.022	22	100	100	TCGGCATGCCATCTTTCCAA	60.323	20	100	92	191	357	547	AGGTATGTATGGTGGGTTGTGG	59.759	22	100	100	ATCGGCATGCCATCTTTCCA	60.107	20	100
nSSR_1587	GT	9|C6193120:1063-1480|+	N/A	N/A	8|C5211700:273-288|+	9|C6036957:204-221|-	11|C6319834:282-303|-	N/A	4|C5590163:339-346|-	2.32	0.38	0.98	ATCCGTACAAGCAGCTAGCTGTAGCTCCCCCACCCACTGCTTTATGAATTGGCCTTCTCTTCTCCTCCTATAATTATATGAATCATATCATATCTCACTCACATCAAATGTCTGCGTTTCACGTGACCGTGGGGTCTATCATTCTTTGAATTCTTCCACATGAACAGAACTTAATTACTCATTCATTTAGGAATATGGCC	GCACGTGCGTACGTACATTACGTATATGTTTAATGAAGGTACGTAGTAAACAAATGTGATTAAGGAATTGGAATGGGAGGCCATTGTGATTATTGCACTATTAAATCAGTTAATTGAATAGAATAGACGAGGAGGAATGTAGAGAGAGATGATGGGACCGAAAGGAAGGGACTGCACTGAACTGCTTACTGCTTGGCCAT	ATGTCTGCGTTTCACGTGAC	59.141	20	100	100	TGGCCTCCCATTCCAATTCC	60.032	20	100	87.5	194	307	500	ATGTCTGCGTTTCACGTGAC	59.141	20	100	100	GGCCTCCCATTCCAATTCCT	59.737	20	100	88.75	193	307	499	TGTCTGCGTTTCACGTGACC	61.149	20	100	100	TGGCCTCCCATTCCAATTCC	60.032	20	100
nSSR_1589	GTA	6|C6211984:1538-1955|+	5|C6222569:377-391|+	10|C5108053:228-257|-	N/A	6|C6056871:730-747|-	4|C6373098:1122-1133|+	4|C7115802:1102-1113|+	N/A	2.03	0.25	0.98	GAGAATCTCTAATAAACACAGAATCATATTCAAACCATTACCGGCCATGCCAAGTAGCCAACCGATCCAATTAAGAACCTCTATCAATTCATTGTCACTGTTTAAGCTAGACACTCTTGGGAACATCAACTTCTACTTCTAGGCATTGCCAAGTCTTCTGGTCTTATGATATCAGGGTTTTCATTAATTGATAGTGGTAC	GTTGTCTCCCTTTCATTGTTTCATGTCTGAATGGCTTATCTTTTTGAGAATTGGGATGAGTTCATACTCACCAGGCTCTGTTTAGATCTACTGAGCAACCAGTACTGATAAACCACCTTCTTTGCTTCGTTTGGAGAGTGGTCAGAGAAGTCAACGTGCAACGCGGTTATGGGAAGCCGCGTTTGACTTTGGAGTAGTAC	GCATTGCCAAGTCTTCTGGTC	59.799	21	100	100	ACAGAGCCTGGTGAGTATGAAC	59.765	22	99.1	100	157	342	498	GCATTGCCAAGTCTTCTGGTC	59.799	21	100	100	ACAGAGCCTGGTGAGTATGA	57.762	20	99	100	157	342	498	GCATTGCCAAGTCTTCTGGT	58.749	20	100	100	ACAGAGCCTGGTGAGTATGAAC	59.765	22	99.1
nSSR_159	AAT	5|C6071178:461-875|+	5|C6177779:218-232|-	6|C5062183:198-215|-	4|C5397544:1538-1549|-	6|C5818707:434-451|+	N/A	N/A	N/A	0.75	0.38	0.97	ACGGATGCGCTGAGGCTGAGCTGCTGCCTGGGGGTTACGACCACCAACGGAGACTTGTTATTGGCGATTCCTCCGCTTCCATGTGATCTGGTCTAGTACTGAGTGATTGAGTCCAGTGGAGATGTTTATTGTTTTCTTTCTAGCTGTGTTCTGATGAGAGTGATGAGAGATGTGGTGCCCCTTATCAGTGGCCCGTGATA	CAAGTAATATAATAATAATGCTCTTTGTAGTAGTATCTATTAGTAGAAATTGTGTTCCGGCAAATTGTAGTATTGTGTTGGCTACTTTTTATCTCTTGGCAATTAATTCATGTTTCATCAACACCCCCTCTCCAATTTAATCCATGCCATGTGAGCCCACCAAGGCCACAAGTGATTCACAAAGGCACCCATACTTGAAA	CCTTATCAGTGGCCCGTGAT	59.53	20	100	95	GGGCTCACATGGCATGGATT	60.758	20	100	100	194	379	572	CCTTATCAGTGGCCCGTGAT	59.53	20	100	95	GGGCTCACATGGCATGGAT	60.153	19	100	100	194	379	572	CCTTATCAGTGGCCCGTGAT	59.53	20	100	95	GGGCTCACATGGCATGGATTA	60.479	21	100
nSSR_1598	GTT	5|C5979164:80-494|+	5|C6237183:1468-1482|-	5|C5214983:545-559|+	N/A	5|C6008881:182-196|-	5|C6394804:1150-1164|+	N/A	6|C5531193:217-234|+	0.37	0.25	0.99	GAGCTTGGACACCATTATATCTCATCTCCTTATCAAGGGTTGTTCATCAAACTTTATGATTTAAATGCTAAGGATTGTCCAAAAGAATCAACACTCGAGTTATTTTGAACTCCGTCACATGCGGTATATTTGAGAGATTTAGGCTAAGTGCATTTTTTTATTAGTATTCTAAGTCAGCTCTAGTACGGGATTAAGGCTTA	TCTATTCTGAGTCGGCTCTACTTTACTAGTACCTATAACAAAAGAAGCCCACACCTGGTCTCAACATGGTAAAAGCTGATCTGTATCTATTCATCAATTACAAAATTGAGATAAAGTCCTGCATCTATCTTGCTTTTGTGCTTGTTTTTATAAGCTTGAGCATAAAATGGTACTGTTGAATAATGTGGCTATGATTGCAA	TTTGAACTCCGTCACATGCG	59.135	20	100	100	CCAGGTGTGGGCTTCTTTTG	59.324	20	99	100	170	182	351	TTTTGAACTCCGTCACATGCG	59.737	21	100	100	CCAGGTGTGGGCTTCTTTTG	59.324	20	99	100	171	181	351	TTTGAACTCCGTCACATGCG	59.135	20	100	100	ACCATGTTGAGACCAGGTGT	58.86	20	100
nSSR_16	AAAG	5|C6153471:80-499|+	4|C6210815:1049-1064|+	N/A	N/A	N/A	5|C6003530:265-284|+	5|C7103280:274-293|+	4|C5744819:1358-1373|+	0.49	0.38	0.99	ATTCCAAGCAGAGAGCAGAGAGAGTGCAAAGTCCCAAATCAAAGACATATATAAAACATGGATCATTCTCCCAAAACTATTTTCATGTTACCTTGAAAGGGGAGACAACCATGGCCAACCCTGAAAGAGAGAGATGGAGAGAAAAAGACTTGTTAGTTGTTACTACTACTTATTGTTAGCATCCAGCTTCAATACAAATT	CAAGAAAGTGAGTGAGAGGCATGACCTAATAATTAGGCACAGCCTTAATTACCACAAGGGAAGCCTTTGCTTTTTAGAAAAGCAAGTGACTTAAATAAAGCAAAAGGAGTAACAACTTAAACTGGTAATGCTTTCTTAGTTTTCTCACTGTCTTTAATGAATAACATGGACTGTTTTTGCTTTCTTGGCACATCCATCCA	AACCATGGCCAACCCTGAAA	60.105	20	100	100	GGTCATGCCTCTCACTCACT	59.099	20	100	100	140	185	324	AACCATGGCCAACCCTGAAA	60.105	20	100	100	AGGTCATGCCTCTCACTCAC	59.099	20	100	100	141	185	325	CCATGGCCAACCCTGAAAGA	60.252	20	100	100	GGTCATGCCTCTCACTCACT	59.099	20	100
nSSR_1606	GTT	5|C6164659:712-1126|+	7|C6116223:378-398|-	N/A	N/A	5|C5732177:353-367|-	N/A	5|C7141170:2301-2315|+	5|C5725529:440-454|+	0.8	0.38	0.98	GTTTAAGATAGTTTGGACATGTGTGTCGCAGACCCAGATAAACCCCAGGTGACTTAGTTCGAAAATATGATAGTTTAGTAAGAGATTGTGTTTAACGATCTACGTATATTATGTATTGAGCCGGATCTTGTCTTTGACAGAGAGAGATATAGACAGAGAATCCATATAGTCAACCCCATCTAGTATGGGATTAAGGCTTA	CATCATGGAGGTTTAAGTTTTTTTGTCTCTTTTCTTTTCAATTATATTTGGGTTGAACAAAGCAAATAAAACAGCCTTCAATCTTCTTCTACAGCATTAATCAAGCATGAGATTTGGAGGAAGTTCCAGGGGCCATTGTATTTCTTGGCCTCATCTCCGGTGTCATCACCGCTGGGTTCCTCCCATGCTGCCGGTCACTG	AGTCAACCCCATCTAGTATGG	56.212	21	100	100	ACAATGGCCCCTGGAACTTC	60.252	20	100	100	187	367	553	AGCCGGATCTTGTCTTTGACA	59.652	21	100	95.24	TGCTGTAGAAGAAGATTGAAGGCT	60.02	24	100	100	193	318	510	AGTCAACCCCATCTAGTATGG	56.212	21	100	100	CCCCTGGAACTTCCTCCAAA	59.223	20	100
nSSR_1608	GTT	5|C6201528:1311-1725|+	5|C6029382:482-496|+	N/A	N/A	5|C5963861:396-410|+	6|C6199628:499-516|-	5|C6806167:289-303|-	5|C5756805:462-476|-	0.37	0.25	0.99	ATTTCAGTCCAGCAAACCAGTGACTAGTGCTTTCTTCTTCAGTTCAGGTTGGTCAGCAAGTGGAAGCAGTTATTTTAACATGGGATAATGGTTGTCGTTGATGAAGCTTGGTTGTTTTGTGGTTGTATTTGATTGTTGGTGTATTATTGATCTAGTTGTTGCTTTATGCTGCTGTTTGATGGCTGGTTGTTGTAGCCATA	CTTGTTAGTCTTGAATGTGTGTATAAACTGGGAATTCAATGAATCAGGGAGAAGGTTTTGTTTGTCTATCTTGCTCATGCCCTTGAGGTGTTCGATGAAATGTTTTAATGAGCTGTTGAGGTGGATATGGCTGCAGTTGTGGTTGTAGCTAGTTGCAGCTGCTGTTGTTACCCTTATTGTGGTGTTGTAGCTGTTGTTAT	TGCTGTTTGATGGCTGGTTG	59.325	20	100	100	CCTCAAGGGCATGAGCAAGA	60.035	20	100	100	134	369	502	GCTGTTTGATGGCTGGTTGT	59.324	20	100	100	CCTCAAGGGCATGAGCAAGA	60.035	20	100	100	133	370	502	TGCTGTTTGATGGCTGGTTG	59.325	20	100	100	TACAACCACAACTGCAGCCA	60.107	20	98
nSSR_161	AAT	5|C6102918:511-925|+	3|C6064804:307-315|-	N/A	5|C5380910:490-504|+	N/A	N/A	5|C6954066:510-524|+	5|C5714683:841-855|-	0.8	0.38	0.99	TAAGAATAAAAAGTCAGTGCCTGAAGAGCTTCCGCATCAGTTGTCATCAAATTGGTTATTTTTCCTGATGTAAATTGTTTACGACCCTCCTGCGTTAACCTAAGTGCTTTGTTAAACACTGCAGCAACCTAAGAAAAGATAATCATGTAAAGGTGATGCCTTCAGAACAATTTTTTTTTATACTATGGCAAGAACATAAA	AAAGAAAATAAATCAGGTCATAATATTTTGTTGAATAATGCTGTTGTTGCAGTAGATCCCCCTTAAAACCTAAGGCTAAACAAAAGCATTATTCAACATACTGTAAATGAGATGTAGTTGGAAACAATGTATCTGAAGTATTCAATGAATTCATAATCAAAGCTATGGCCAAGAAGTAGTTTGTACTTGACTACGAAAAA	GTTTACGACCCTCCTGCGTT	60.32	20	100	100	GGGATCTACTGCAACAACAGC	59.26	21	100	100	199	276	474	TACGACCCTCCTGCGTTAAC	59.472	20	100	97.5	GGGATCTACTGCAACAACAGC	59.26	21	100	100	196	279	474	GTTTACGACCCTCCTGCGTT	60.32	20	100	100	GGGGATCTACTGCAACAACAG	58.64	21	100
nSSR_1611	GTT	6|C5919061:152-569|+	N/A	N/A	N/A	5|C5956171:350-364|+	6|C6354524:607-624|-	6|C6893208:380-397|-	6|C5753373:369-386|+	0.4	0.38	0.98	ATTGATTTTATGAAAAAGCAAACTAATAAAAATATTGTGCTATATTTGAAAATATGACAGAAATGTTTTTGTTATAAAATTCTAAAAGCAAATTCTAATTTACAACCTTCAAATCAAGAAACCTTCACCTCCAAGTCTCCAAGTTGATCAAGTCTTCAAGCAACTTTTTCTTCGAAGATCATTCTTGGCCTGATCTTTCG	CTTTCTCCAATATTTTTACTTGTGTCATGTCCTCCTTGGTCTTGTAATTTACTCTTCGACATCTAACCAGTTCTTCAAGCATTTGCGCATCTCCAAAGAAGCTTGGCTTAACTGACTCCTTTTGTCATCTAGTACTTTGCTCCTTGCACAAAAAAAGTCTCCAATATTATTGTGAATACCGGTGAGGGTTAATTACATAG	CCTTCACCTCCAAGTCTCCA	58.648	20	97.5	100	TGGAGATGCGCAAATGCTTG	59.828	20	100	100	192	272	463	ACCTTCACCTCCAAGTCTCC	58.647	20	97.5	100	TGGAGATGCGCAAATGCTTG	59.828	20	100	100	193	271	463	ACCTTCACCTCCAAGTCTCCA	60.415	21	97.6	100	TGGAGATGCGCAAATGCTTG	59.828	20	100
nSSR_1612	GTT	6|C5988702:254-671|+	4|C6003262:397-408|-	6|C5242425:397-414|-	N/A	5|C5927959:253-267|-	6|C6208282:304-321|-	5|C7126964:389-403|-	N/A	0.75	0.25	1	TCACATGGCTGGGTATAAGTTTATAGGAGCAATCATTCAGATTGGTTGGGGTTACTAAGATAATAAGTAGTGGTTTCTGTGTTGAAGAAAGTCATCATCATCAGCAAATGTGACCAGAACACATTTTAAAGCCAAATGACAACAATGTGGTGTTGTGAGTAGTACCTCGCTGTTATCTCTCCAAATTACCACCATGTTGG	GTCGTTGTCTTTTTGTATTAGTTGAGTATTATAGCTTTTGTGGCTCTGCACAAGATTTTAACAAATAATCTCACCTTTGGAGAGGGTTGCCTGACCAACTGAACTGTTAGCTGGAGATGAATTTTTATTGATTCTTTATTTCATAGATATGGGTAAACTTTCTCCTTGTGTTAGGATTGCTGTCTATTCCTTTCATGGTC	ACCTCGCTGTTATCTCTCCA	57.855	20	100	96	GCAACCCTCTCCAAAGGTGA	59.89	20	100	100	145	363	507	ACCTCGCTGTTATCTCTCCA	57.855	20	100	96	GTCAGGCAACCCTCTCCAAA	59.89	20	100	100	150	363	512	TGTGAGTAGTACCTCGCTGT	57.804	20	100	100	GCAACCCTCTCCAAAGGTGA	59.89	20	100
nSSR_1614	GTT	6|C6082756:521-938|+	N/A	6|C5148371:471-488|-	N/A	6|C5968921:387-404|-	6|C6400620:493-510|-	3|C7129204:790-798|+	N/A	1.2	0.38	1	GAAATGGTTGGAAAGGTGACAAAATAGCAGGTCATCTAGTAATGAGGAAAAGACATTTACAAGTATTTTACAGGAATTATTCCGTTACCCTGGGTAGGACCTACGTATATTAGATATTGAGCCGGATCTTGCCTTGACAGAGCGACATGGAGACATAGAATCCATATAGCCGACCCCATCTAGTATGGGATTAAGGCTCA	GTACCCTGGGTAGGTATTTACTCTTTCAAGTGTCATGAGTTCAAGGAGTGTTGGTGCTAAAAAGAAAAGTCAAAAAGTGACCGGTCCACATTTATTTGAAAGAAATTGCATCATCAACAAAGTAGTAGACAAAGAATAAGAAAATCTCCTCCACTAGTTTCTTTTTCCAGTTTCACAAGGTTCAATGAATCAAAGAAGAT	TTGCCTTGACAGAGCGACAT	59.965	20	100	100	AGCACCAACACTCCTTGAACT	59.787	21	100	100	148	328	475	CCTTGACAGAGCGACATGGA	59.753	20	100	100	AGCACCAACACTCCTTGAACT	59.787	21	100	100	145	331	475	CCGGATCTTGCCTTGACAGA	59.75	20	100	100	AGCACCAACACTCCTTGAACT	59.787	21	100
nSSR_1616	GTT	6|C6132493:155-572|+	N/A	9|C5327636:396-422|+	8|C5229694:415-438|+	N/A	N/A	6|C7092492:387-404|-	6|C5746569:1070-1087|-	1.26	0.38	0.98	GACAAGAAATACTTTCTTGCTCATTCTACAACAAACACTTTTTGACTTAGGGTTTATAACTCTATATATAATATATATATATATAGTTTGTTATTTTAATGAGGTAACACCAACAACATTTTCAAACAGAAAATTAGTATGGAACATACCAAACAAAATGGACAATTAGGTTTAGGTTACCTATTATATAGCTTGAAAGG	GTGCATGGTAAAAGTAAAACCATGGGTGTTACCTAGGGTTTGCAAAGCAGTGACTTGAGACTTCAAGAACTTGAGATAGTTGGCAGCCTCATCAAGCATTGAAGCAGTGTCCATCTTTGTACCTCCAGGGACCAACCTCTGCAACACTCTTAACCTTTCACTGATCCTCTCCCTTCTCTGCCTTGCAGCCACTGTTTGAG	TGAGGTAACACCAACAACAT	54.786	20	100	100	GTCACTGCTTTGCAAACCCT	59.253	20	97.5	100	173	253	425	TGAGGTAACACCAACAACAT	54.786	20	100	100	AGTCACTGCTTTGCAAACCC	59.253	20	100	100	174	253	426	ATGAGGTAACACCAACAACA	54.786	20	100	100	GTCACTGCTTTGCAAACCCT	59.253	20	97.5
nSSR_162	AAT	5|C6110206:309-723|+	5|C6174459:773-787|+	5|C5097887:238-252|-	N/A	5|C6058613:1289-1303|-	N/A	6|C7038720:477-494|+	5|C5743501:232-246|+	0.37	0.25	1	TTATGTTTGAAACTAGATTGTGTGAAACCATTCCAACAAAGTAACTTAGCATGTTACGCCAAGCATCATGTTGAACACCATCAAACACCATCTAAGGCTCTACTGTTGGCTAAATTACAAATGACGAAAAAATGACTGAACAGTTTAGTTTTTTTCTATAAATAATGAGATAACCACACAGGCATCAAATTTTAAAAGAA	AACAATAATAATTAAAAACACTATATTGGCTCTAACCAAATGACATCCTCTTATTTTATGAATTGCCAAGTGTGTGTTCTTCCCTAAATAGTGAAGGAAGTGATAAAATTCTAAAATTACCTCATAAGAGCCATAGCCATAAAGCATTAAAGGATCAGAGCCATCCAGCTTAACAAGATCCTTCCTATATAGAATAGACA	TGAGATAACCACACAGGCATCA	59.429	22	100	100	GGGAAGAACACACACTTGGC	59.331	20	99	100	134	365	498	TGAGATAACCACACAGGCATCAA	59.991	23	100	100	GGGAAGAACACACACTTGGC	59.331	20	99	100	134	365	498	ATGAGATAACCACACAGGCATCA	59.799	23	100	100	GGGAAGAACACACACTTGGC	59.331	20	99
nSSR_1620	GTT	7|C6186196:576-996|+	8|C6117801:428-451|-	8|C5222585:359-382|+	8|C5206826:250-273|-	N/A	8|C6260802:294-317|+	N/A	8|C5760617:2496-2519|-	0.37	0.25	0.99	TGCTGGTTTCCAGAACCAAGAGCAGATAATCATGTGCCACACCATAGTATAAGTCTTGCTAAAACCACAAACAGCCAGAACTAGAACTTTCAAAAATATGTAAGTGATAATGATAAAGGTGGAAGCTCAATAGATCAATGAAAGAGAGGTTAAAACAAAAAGAAAATTATTGCATAATCTGCAATAGAGATTGAGGCTTA	CTTCTGCAATAGAGATTGAAAGTAATTGACAGTACAGAAGTCATGGCGCAATCAGACCAGAGGTTACAAAAACAAAATTTTCAGGAAGGCAAGCCGTTTGTCCTTGATAGTGCAGATTGTTAATAATACTCCGGAGCAAAATATCAAAGTACAATACAGGTTGCCCAAAGATAAAAGAAGGTTACCCAATGGGAAGTCAA	TCTGCAATAGAGATTGAGGCT	56.51	21	99.04	92.38	CTCTGGTCTGATTGCGCCAT	60.463	20	99	100	106	377	482	TCTGCAATAGAGATTGAGGCT	56.51	21	99.04	92.38	ACGGCTTGCCTTCCTGAAAA	60.467	20	100	90	141	377	517	TCTGCAATAGAGATTGAGGCT	56.51	21	99.04	92.38	AACGGCTTGCCTTCCTGAAA	60.467	20	100
nSSR_1621	GTT	7|C6202588:1106-1526|+	5|C5952508:365-379|-	7|C5342107:1135-1155|+	3|C5339090:833-841|-	5|C6010713:921-935|-	N/A	N/A	N/A	1.5	0.38	1	CAGCCGAGGTTCATCCCACAACGTGGTGCTGTTCTGAGAGCTGTCTTGACTTCTCTTTTTCTTTTGTTCATGCATCACTCTCTTTGGCCTCTGCCGGGTAAGAGTTCAACCGCGGGCGGCGGAGGAGAGGAGGAGGGTGGCGGCGGAGAGTCTGGGAACCGTTGAAACTGCGAGGACTCTCTTAAAATCTCCGAGTATAA	ATATTTTTATTGAATTCTTGTACTTAGTTGATTGTTGTGGTAAAGTTTAAATATGGGTATTTGAATAAACATGACTAAAAGCAGTGTTTTGATTTTATTGAATGAAGTTTGGAGCTAGCAAGGAAGAGAATTGTTTCCCCTTTTAATTGGAAGGAACTGAGCATATTGCCATGCAATTATTTTATTGTAGGTGATGTGCG	AACCGTTGAAACTGCGAGGA	60.179	20	100	100	TCTCTTCCTTGCTAGCTCCA	57.762	20	100	100	194	356	549	AACCGTTGAAACTGCGAGGA	60.179	20	100	100	TCCTTGCTAGCTCCAAACTTCA	59.628	22	100	100	189	356	544	AACCGTTGAAACTGCGAGGA	60.179	20	100	100	TCTCTTCCTTGCTAGCTCCAA	58.46	21	100
nSSR_1627	GTT	9|C6213404:1011-1437|+	8|C6045956:502-525|+	9|C5325348:1485-1511|+	8|C4975422:215-238|-	N/A	N/A	4|C7074660:231-242|-	N/A	1.85	0.38	0.96	GCATCGTAGACCCCCCGATATATGCCTCCGTTCGAAAAAAAATGATAGTCTAGTAATAGAAGGTAAGAAGAGTAGAGGTAGGCCTAGGATTAAGTGGAGAGAGATAGTGGATAAGGATTTATATAGATTAGATATTGAGCTAGATCTTGCTTTTGACAGACCCATATAACCAACTCCATCTAGTATGAGATTAAGGCTTA	GTATTATTTCATATGCCAAAATAAGTTTTTATTCTTTCCCATTATAGTTATCATAAAAAGAAAAACCTCAACAAACTGTTATTTTACATCAATTAAACAAAATCTACAATTAAATTAAGGCGAAAAGCCAATTTTGGTCCCTAAACTATGGTATATTGTTCATTATGGTCCCTGTACTATGAAAATGTTCAATATGGTCC	ACCAACTCCATCTAGTATGAGA	55.449	22	96.62	100	CCAAAATTGGCTTTTCGC	53.433	18	100	100	196	368	563	ACCAACTCCATCTAGTATGAG	53.877	21	96.4	100	CCAAAATTGGCTTTTCGC	53.433	18	100	100	196	368	563	AACCAACTCCATCTAGTATGAG	54.717	22	96.62	100	CCAAAATTGGCTTTTCGC	53.433	18	100
nSSR_1629	GTTT	5|C5863386:48-467|+	4|C6240411:272-287|-	N/A	N/A	4|C5849790:295-310|-	4|C6235902:470-485|+	5|C7077808:655-674|-	4|C5735959:320-335|-	0.47	0.25	1	GTCGGCTTGTAACATATGGTCTACCGATGAGTTGTCGGCTTCTTGGCCATTGGAATGGTCCTCCCAGTGATCTCCATCTCGGACTCGGAGAGACATTTGGTTCCAAAGAGTTTGGGAGGGATGAGGCCGAGAGGCCTATGAAATGCAAGGAAATGGACAGTTCAATGTCGTTTGGTTTTGATGGAGAGAAATTAGGAAAG	GGAGGACGAGAGAAACGGAAGACCACAGTTGTTTCTCTTCTTACTTGGTTGTAGACCTTCAATAGATAACCATCAATAAATTTAAATTTGATTTTGACCACAGATATATTTATGCATAAATCCAAGGTTAATTTATAAGTGCATATTTATATGTGCGAAAATAAAGATGAGTCCGTCGAGCACCTACTGTTTTGCTGTCA	CTCCATCTCGGACTCGGAGA	60.179	20	100	100	GTGGTCTTCCGTTTCTCTCGT	60	21	100	100	175	118	292	CTCCATCTCGGACTCGGAGA	60.179	20	100	100	TGTGGTCTTCCGTTTCTCTCG	60.001	21	100	100	176	118	293	GGTCCTCCCAGTGATCTCCA	60.326	20	100	100	GTGGTCTTCCGTTTCTCTCGT	60	21	100
nSSR_1630	GTTT	5|C6068948:87-506|+	4|C6228013:1586-1601|+	4|C5157087:385-400|-	4|C5281070:530-545|-	N/A	4|C6076122:190-205|-	N/A	N/A	0.4	0.38	0.99	AACAACATCCCACTCAAGAGGCTTTCAAACAGCAGTTGTGATGACTACCGACAGGACTCAAGGAACTTGAGCACAAGTATTCCCTCCGTGGGGTCTCTTAATTACTGAACAAGCGACGAAAAGCTTCAAATCTCAAAAACCTTGGAATGACCCTCCCTCCTTTCTGAAGTTTTGTTGCACGAGTAAGTCTTCAAGTTTAC	GTTCAATTATTGTATCATATGATATGCATGAACCTGATCTATATATATTCCTCATGTATTACTAGAACACCGATTATGTTAATTTCCACATCTATATTATTCCGACCACACTTGCAAATTAGGTTTCATCTCATATCGAAACAGAAAGCAAACATTGTTCTCACATGCTTGTCACGATCCGAAGTTTCAGTCATACTGAT	TGGAATGACCCTCCCTCCTT	59.879	20	100	100	TTTGCAAGTGTGGTCGGAAT	58.314	20	100	100	196	228	423	TGGAATGACCCTCCCTCCTT	59.879	20	100	100	ATTTGCAAGTGTGGTCGGAA	58.314	20	100	100	197	228	424	TGGAATGACCCTCCCTCCTT	59.879	20	100	100	AATTTGCAAGTGTGGTCGGA	58.314	20	100
nSSR_1631	GTTTG	5|C6188866:813-1237|+	4|C6239957:747-766|-	5|C5017001:339-363|-	N/A	5|C5984789:302-326|+	N/A	5|C7070346:796-820|-	N/A	0.4	0.38	0.98	TTATTCTAATTTACTCAAAAAGTTTACCTTTAAAATTATTTTATTCTTCTTTTTAATTCTTACAACACCAAAAATCCAATTTTTTATAATAACATTTGAATATGATAAATATACTCATGATATATTTTACTTTTTATTTAAAAAAAATCTTAAAATTTTGTCCCTAGAATTAAAGAGAGGAAAAGGTGATAGTGAAGAGT	ATTAGTGAGAGTTTGTGAAGAGGATGTGAGTGGTTGTGGATGAGAAGATGATATGATATTAGAAGGTGGTGGTTGGATTGGACAATGGAGGCACCACTTGCAGGGTGGTGGCATGAAGGGCCCTCAAGAGAAGAAGTATATGCATGAAATTAAGGGTGGACTTGAGAGGGGATGTGGGGCTAAGTAATGCCTCTTGGTTC	AGGAAAAGGTGATAGTGAAGAGTG	58.201	24	100	100	GTCCAATCCAACCACCACCT	59.888	20	100	96.25	131	377	507	GAGGAAAAGGTGATAGTGAAGAGT	57.956	24	100	100	GTCCAATCCAACCACCACCT	59.888	20	100	96.25	132	376	507	AGAGAGGAAAAGGTGATAGTGA	55.926	22	100	100	GTCCAATCCAACCACCACCT	59.888	20	100
nSSR_1632	TA	6|C5775350:8-419|+	N/A	7|C5194423:353-366|+	10|C5064471:267-286|-	7|C5905411:568-581|-	7|C6295924:287-300|+	N/A	N/A	1.36	0.38	0.98	TGGAATGTATCTTATTTCCGATCTGACCAAGAAATGTAAACCTATTATCATATTTAAATAAAATATGATTTATTCTTTTTTTTTAAAGAAATGTTTATCTTATAGAAAATGTTTCTAGTCCAAAAACCCGCGTAGAGTTAAACGCTCCACAATGAGACGATTTTTTTTTAAAAAATAAAAATATAATTAATATGACAAGT	AATCTAAACTTTGATTTGATGATTAAATGGAAAAGGGTGCCCACCATTCATGAGTGGCATTATTGTTCAAATCCTTGAACCAAGTCCATGAGTGACTTGATCATGAAATCCCCCAAACCAATCTATTTGGTTGGTTTTCTTGTAGACAATGAATGAACAAAGTCTACTTCTACTGCTCTTCTCTCTCTCTCTCCAAATTA	AACGCTCCACAATGAGACGA	59.683	20	100	100	AGTCACTCATGGACTTGGTTCA	59.294	22	100	100	169	147	315	AACGCTCCACAATGAGACGA	59.683	20	100	100	ACTCATGGACTTGGTTCAAGGA	59.289	22	100	100	165	147	311	AACGCTCCACAATGAGACGA	59.683	20	100	100	CACTCATGGACTTGGTTCAAGG	59.184	22	100
nSSR_1633	TA	6|C5813220:68-479|+	6|C6125253:665-676|-	N/A	N/A	6|C6056641:567-578|-	5|C6391818:200-209|+	6|C6935738:190-201|-	6|C5322265:181-192|-	0.37	0.25	0.98	GAGATAACCCCTCACAAAATCATCGATCGATCAATTTTTAATTATGTTGATATTATTTTTATAACGATGATTAATTAGATTACTCATTTTTTATATCTAATATAAATCTTGATTTTATACATGTAATTACAATAAGCAGCATATTTGGTTTGCATGCAATAAAGTAAAAAAACAAAAAACAAAATTTAATCATGGATTGC	CTGTGCATGCACCTCTATAACATTATCAAGAAAGTTTGCTTTCTTGGACAGATGCTAATCACTGAATTGTGGTGAGGATACATAAGAATTATTCTTTACCCAAGGGAAGTGAGGCCAAGAAACCTCAAGCCTCTTGTTTGAGAGTGAGAGGCATGTGCATCATGAGCTCTTGGGGGTTTTCCATGGTCTCTCCTTTTCAT	GCAGCATATTTGGTTTGCATGC	59.969	22	100	100	TCTTGGCCTCACTTCCCTTG	59.598	20	100	100	197	202	398	GCAGCATATTTGGTTTGCATGC	59.969	22	100	100	CTTGGCCTCACTTCCCTTGG	60.61	20	100	100	196	202	397	GCAGCATATTTGGTTTGCATGC	59.969	22	100	100	GCCTCACTTCCCTTGGGTAA	59.303	20	100
nSSR_1637	TA	6|C5927945:61-472|+	6|C6240759:2275-2286|-	N/A	7|C5248532:384-397|+	N/A	6|C6362184:921-932|-	5|C7039702:524-533|+	N/A	0.63	0.38	0.99	AGCGACTCTCAGGCCATCACTATTACTGCTTCTTAGACGGGATGTCTGGGTATCTACAAATCCCCATAACCCCTGAAGACGAAGAGAAAATGACATTTACATGCCCGTACGGTATGTTTTCTTATCGCAGAATGCCTTTTGGTTTATGTAATGCACCTGCCACTTTTTAACGTTGCAAGATGTCTATTTATGCTTTTTTT	AGATTTTATGCAGGTTTTCATGGATGATTTCTCAGTATTTCGGTGACTCTTTTGACCTATGCCTCCATAATCTAGAATGAGTCTTGCAATGTTGCGAAGAAACTGACTTAGTTTTGAACTTGGAAAAGTGTCATTTCATTGTCCAAGAAGGTATAGTCTTAGGACACAAAATTTCTAAACATGACATCAAGATAGATAAA	ACATTTACATGCCCGTACGGT	60.066	21	100	100	TGGAGGCATAGGTCAAAAGAGT	59.087	22	100	100	187	152	338	ACATTTACATGCCCGTACGGT	60.066	21	100	100	GGCATAGGTCAAAAGAGTCACC	58.99	22	100	100	183	152	334	ACATTTACATGCCCGTACGGT	60.066	21	100	100	GGAGGCATAGGTCAAAAGAGTCA	60.055	23	100
nSSR_164	AAT	5|C6128813:170-584|+	4|C6093490:273-284|+	5|C5255662:255-269|+	5|C5372668:747-761|-	5|C6083067:965-979|-	N/A	N/A	N/A	0.4	0.38	0.98	TTTTTTTTTAAATGAAAGTGCTCAATCCGAAAAAACTAATATTGGTACCAGATTGCTTTGCTAAGGGGTTCCGTTCTCTTAGGAAGAACCCGGGATGAAGCCCCCCTCTTGCAAATGCGGGAATTCAGATGAATAGAGTGTTCTTTGTGCCTGGCCCATCCTTGACATCCCTCGTGGGGCACATATCACCATAGTTAAAA	ATTTTAATATTCAAAGTTTGCATTCAGTTATTTGGGATTCAGGCTAATGCTGCTGAATTTTAGTTTGCACAAAAGTGGAGCATGGCTATTAAGAAAAATAAAAACAAAACATAATAATTAAGAAAGGGCACTATTATTTCTGAAAGTTGTATGAATGGTATATCATCAGACTCAACTGTTCTTTTTTCTCAAATTGTATT	CTGGCCCATCCTTGACATCC	60.467	20	100	95	GCAGCATTAGCCTGAATCCC	59.043	20	100	100	118	319	436	CCTGGCCCATCCTTGACATC	60.467	20	100	93.75	GCAGCATTAGCCTGAATCCC	59.043	20	100	100	119	318	436	GAAGAACCCGGGATGAAGCC	60.748	20	100	96.25	GCAGCATTAGCCTGAATCCC	59.043	20	100
nSSR_1642	TA	6|C5975456:163-574|+	5|C6237747:1430-1439|+	6|C5203115:320-331|+	6|C5050602:194-205|+	6|C6069669:291-302|+	6|C6387262:1503-1514|-	N/A	N/A	0.37	0.25	0.99	AAAAAAATGGAAGAGGAAGAGGAAAAGGTCAGAGAAAGGGAGAAGAGATTTGTGGAAGTAGATGTGGTAAAATATTGCTTTTTACAAATAAACTTTTCTTACTATTGATCAGGTATTTATGCAATTGGTGTTTTGTGGGGGTATGTATGCAAATATGGTTTTTATGGAGTTAAATATGCAATTATAGAATTTTGTGGGGC	TGCGGATTTTTCATATTAAAGAAATCAGAAGGAATAGAAAGTGGAAATTTTATGAAAGATTGTATCTTCAAAATTATGATTTTCATCATTTACTATCTTTAAATTCTTAATAAGGAGAGGTGCTAGCCAGTGGCACTTGTCCTTTTGACTACAAATAGCCAAGCTTGGGCCAAATTTGCCCTTTTGACTGAAATAAGCAA	GGGGTATGTATGCAAATATGGT	55.965	22	100	100	AGCACCTCTCCTTATTAAGA	52.716	20	100	100	199	299	497	GGGGTATGTATGCAAATATGG	54.149	21	100	100	AGCACCTCTCCTTATTAAGA	52.716	20	100	100	199	299	497	497	497	497	N/A	N/A	497	497	497	N/A
nSSR_1643	TA	6|C5981526:280-691|+	5|C6075836:554-563|-	6|C5318732:249-260|-	5|C5068387:249-258|-	N/A	N/A	6|C7039786:210-221|+	N/A	0.49	0.38	0.97	TTAAGAAAATATAATATGAATGAATGTGAAGAAAGGAAAAGAAACATGATTGCGTGACGGTTACCGACTGTTCTGTTCATGAGCCTTCACACTGTGTATTTTATCTACTTCCTTATATGCCTCTCCCAAAATTAATACTCCTCTCCCTAAATTAATACTTCAAGGAATATGCCAATTTGCGATCCCATGTGCTCCAAGGT	GCAATGGAGGGTAGCCTGCTTATTCATCAAATCAAAACCATGAAGAACATGTCCTTGTTCCTCCCAATCCTTCTCATCCTTCCCTTCTTTGCAGTTCTATCCAATGCACAGGACTTCGACTTCTTTTACTTTGTTTTGCAGGTGTGTAGTAGTAGTGTACATCTTTTAGTTTAGTCTGTGTTGTGTGTTACTTCAGGCAT	GATCCCATGTGCTCCAAGGT	59.743	20	100	100	TCGAAGTCCTGTGCATTGGA	59.315	20	100	100	151	380	530	GATCCCATGTGCTCCAAGGT	59.743	20	100	100	GTCGAAGTCCTGTGCATTGG	59.201	20	100	100	152	380	531	TGCCAATTTGCGATCCCATG	59.539	20	98.75	100	TCGAAGTCCTGTGCATTGGA	59.315	20	100
nSSR_1646	TA	6|C5997492:198-609|+	6|C6232011:469-480|-	N/A	5|C5188362:284-293|+	N/A	6|C6393924:1723-1734|+	N/A	6|C5654839:650-661|+	0.4	0.38	0.99	AGAAAATTAAGATTGTACACTCATGATGATCTATGCTCCAAATAATGGGCAATAATATCACTAGTCAACTGTGGAGCCTACACAAGTAAGCAATAATGTGTAACAAGCATCTGAATGTAGGTTGTCTGAAATTGTTTATGTATCTGACAGGACAAGAGAAAAAAGGTTACAAGGCAGCAAAAGATGATCTTTCCTTCTTT	CACACACTTCCATGGTCTCACGTCCATATATCACCTTAAAATATGATTCATAGATAGACAAACTGATGGGGCTTTGAAACCATGTTTGACCTCTAAAACCTGGATCAAAGGTTAGCATTCAAATGTTAGGAAACATGAGATCAAATAGATACCGTCATTATATGAATTTAAGTTTTGATCACTAAGTACTGCAGTAAAAA	GTCAACTGTGGAGCCTACACA	59.93	21	100	100	GGACGTGAGACCATGGAAGT	59.391	20	100	100	174	260	433	AGTCAACTGTGGAGCCTACAC	59.655	21	100	100	GGACGTGAGACCATGGAAGT	59.391	20	100	100	175	259	433	TCAACTGTGGAGCCTACACA	58.581	20	100	100	GGACGTGAGACCATGGAAGT	59.391	20	100
nSSR_1648	TA	6|C6003206:202-613|+	N/A	6|C4934012:223-234|-	N/A	6|C6081583:1295-1306|+	N/A	6|C6861932:352-363|-	7|C5724497:749-762|+	0.4	0.38	0.99	TTTTAATTTAAACCTCCAAAAGTAGCTATTCAGTGTTATCCACTAAAGAGCGGCGGTATGTGTGCTCACGGGCGGGGGAGGTTGGGTTAGAGAGAGATATCCCATTATCTATATATATTTAAGCATCAATATGAAATCCTCATGCATCTATCCACGTGCCCTGGTTTCCCTTTACCTAGTATATATCTAAATTATTATAT	ATATAGCACAGGTGTCCGTGCTTAGATGAAAGAATTCAAAACCATCCTTATCTAATCATATATATTTATATAAAATACCAATCTATCAAATCTTATCATTAACTCAACCTCAGCCAACCACCTATTATTTATATAATATTTTCTTATATGTACCAATATGTATCCCTCATCCTCTTTGTAATATCTATGCACGTGACTTG	CTATCCACGTGCCCTGGTTT	60.035	20	100	100	GTGGTTGGCTGAGGTTGAGT	60.179	20	100	100	186	347	532	TATCCACGTGCCCTGGTTTC	60.036	20	100	100	GTGGTTGGCTGAGGTTGAGT	60.179	20	100	100	185	348	532	TGCCCTGGTTTCCCTTTACC	59.886	20	100	100	GTGGTTGGCTGAGGTTGAGT	60.179	20	100
nSSR_165	AAT	5|C6142813:120-534|+	N/A	5|C5228573:481-495|+	5|C5308334:429-443|-	6|C6071715:1227-1244|-	N/A	7|C6851114:240-260|+	N/A	0.8	0.38	0.99	ACCAATCCAACCTCAAAACATATTTAGTCCACATTTATTAAAAAAAAACAAAAATATCTATATACTAATTAATCAACACAATACTTTTATTTTAAACAGATTATTTCACATCAATATATAAACAAGTTGGCTTCTTTTTTCTTATGTATTTATCTCTATCCAACGTCCCAATTAACTCTTCTAATTCGTATCACAGTTAA	GTTAACAACCCTAGATAGTTAGATAATCACTTGTAAGCTAGACTTAGCTAGCTAGTAGATAAGTCCACTTTAATTGTCTTCCCTAATTAATTTTTTATATCTATCATTCCTTCATTTTTTTTGTTGATAAAGTGGATAAATCACATTCATTCATTAGAAAATAGAATTATAGTACATAATACATGGATAGGATCTTTTGA	TCCAACGTCCCAATTAACTCTTCT	59.959	24	100	100	GGGAAGACAATTAAAGTGGACT	55.987	22	100	100	140	277	416	TCCAACGTCCCAATTAACTCTTCT	59.959	24	100	100	AGGGAAGACAATTAAAGTGGAC	55.987	22	100	100	141	277	417	TCCAACGTCCCAATTAACTCT	56.938	21	100	100	GGGAAGACAATTAAAGTGGACT	55.987	22	100
nSSR_1654	TA	6|C6033716:222-633|+	6|C6244159:1645-1656|-	N/A	7|C5080647:197-210|-	N/A	N/A	6|C7126894:843-854|-	6|C5725845:223-234|+	0.4	0.38	0.99	TAGTGAAACTAGAAGTATGTACAAATGGTGTCGAATATATCGGTTTATGATCAATTGAGAGGAGGTTTCCAAAAACAAAAGCAAAGGATTTTAGCCAGCAACCTCTCCTCTGGAGTGGTATGATTATATGAATTGACTTGTATATACAGGTAATATATATTGAATTTATGAAGTGCTATACACTTTCTAATAATTTTCTG	AACATGTTTGCATGGTGGATTCATGCTGAAAATACTCGTACCTGTAAACTATGCAGTTATCAGTCAAGGTGAATGACATCTGAGTTAAAAAAATTCTGATACATGAAATTACGGCAAGCTTGTTACCTGAAAGTGAGAACTACTCAAGCAATGGGCGATCCGATGGAAAAGGGGAACCATACATCGCTGGAATTCTGATG	TAGCCAGCAACCTCTCCTCT	59.958	20	100	97.5	CATGAATCCACCATGCAAACA	57.404	21	100	100	146	291	436	TAGCCAGCAACCTCTCCTCT	59.958	20	100	97.5	TCACCTTGACTGATAACTGCA	56.952	21	97.6	100	193	291	483	TAGCCAGCAACCTCTCCTCT	59.958	20	100	97.5	TGAATCCACCATGCAAACAT	55.885	20	100
nSSR_1656	TA	6|C6046510:240-651|+	N/A	6|C5115233:340-351|-	N/A	N/A	6|C6256394:390-401|-	6|C7117416:657-668|-	7|C5744195:289-302|-	0.4	0.38	1	CATGTCAGCACCAGACCTCTCCCTGACCTGGTTGAGCTCCTGGTCTGGAGTCCAAGTGACCAGCATTCTCTTTCTGAGCTTGTGGGGAGTTTTACAGAGTGAATGGAGGATTGTGGAGAAGAAGAGGTGGGGTTGGCTGGAAGATGGAGTGGCCATGCTGGAGTTTGCCAATGACTTGATATTGTAGGCTTGCATGCATG	CATAAATATAATGTATATATTTGCATACATATTATTATACATGGGATTGATGAGGATAAGTTTCAAAGCTTGATGAATATTTGGTTATAATATTATCAAGTTGTTCTTGATTTGTGGATGGAAGTGAACTTGTTCAGACTTGGATTTCAGTGGATGCATGGTTTGGAAAATGACAAGATACTCTCCAAGGTTAATTTCCT	TTGTAGGCTTGCATGCATGT	58.452	20	100	100	TCCAAACCATGCATCCACTGA	59.925	21	100	100	198	381	578	TTGTAGGCTTGCATGCATGT	58.452	20	100	100	CCAAACCATGCATCCACTGA	58.452	20	100	100	197	381	577	TTGTAGGCTTGCATGCATGT	58.452	20	100	100	TCCAAACCATGCATCCACTG	58.452	20	100
nSSR_1667	TA	6|C6082192:89-500|+	6|C6045162:397-408|-	6|C5318920:739-750|-	N/A	N/A	6|C5966650:215-226|-	6|C7042668:419-430|-	7|C5726795:791-804|+	0.37	0.25	0.98	AGAGAAAAAAAGGAAACAAAAGCTAGCAGTACTCCTTATCATAATATATAGAAGCTTACGGAACCACTGCAGCATCAATGATCTCTGGTTGAGATTGCAGTACATGTTCTAGTTCAGCAGGTGGAACCTTCATCAAAAAAATCAAATCAGAATCAGAATCACACTTTAAACTTAAGTGATTTAATTAATCTTGCATGCAT	CCTGATAAGCCTTGTACTTGATCATCTCTTTGAGCCGATCGACGATGAAGAGAAAACCATCTTCATCGAAGTAACAAAGATCACCGGTTTTTAACCATCCTTCGGAGTCAAAAGCAAGGGCATTAGCCTCAGGATCACCAACATAACCTAGTGATTGTCAATATTGTTAGTATGTTTACAGTTAGGTTTTAATGCAACAT	TACGGAACCACTGCAGCATC	60.391	20	100	100	CGTCGATCGGCTCAAAGAGA	59.901	20	100	96	200	144	343	GGAACCACTGCAGCATCAATG	60.135	21	100	100	CGTCGATCGGCTCAAAGAGA	59.901	20	100	96	197	147	343	GGAACCACTGCAGCATCAATG	60.135	21	100	100	TCGTCGATCGGCTCAAAGAG	59.901	20	99
nSSR_1669	TA	6|C6093910:370-781|+	6|C6234219:1338-1349|+	6|C5169911:554-565|-	6|C5286616:666-677|-	6|C5730651:263-274|+	6|C6292694:572-583|+	5|C6842500:197-206|-	N/A	0.35	0.12	0.99	CAATCAAGTTAAAAATTAAAATATCATCTCTGGATTATGATTATGAAAATCTTACCTTTGTTCCATGAGTTTTCATTGAACCTTAGCTCAGGCTTACCCTTTTGGGACAAAAAGGGTCCAAGCTCCTCAGCCTCTCCATAACCAATAGAAGAACAACCAGGTCCTGCAATCAATAACCCATCTAGTTAGCCATCAAATTC	AATAAAATAAAATCAAGAATATATAGAAATCAAGAACAAACCTCCATTGAGCCAAAGAACAACAGGCCTCTCAGTAACATTGTCCATGGCTTCAAAGAACCAGTAGAAGAGTGCCCTCCCATGGCTCTCATTGACAGTCACATAGCCTGCATACTGTTTGAAGTCAACCGGGGGCTGGCCGGGCAATCGGACAACTCGGT	ACAACCAGGTCCTGCAATCA	59.522	20	100	100	AGGCCTGTTGTTCTTTGGCT	60.106	20	100	100	129	352	480	AGAACAACCAGGTCCTGCAA	59.449	20	100	100	AGGCCTGTTGTTCTTTGGCT	60.106	20	100	100	132	349	480	AAGAACAACCAGGTCCTGCA	59.449	20	100	100	AGGCCTGTTGTTCTTTGGCT	60.106	20	100
nSSR_1671	TA	6|C6116560:59-470|+	6|C5912404:209-220|+	5|C5281280:414-423|+	N/A	5|C5975385:621-630|-	N/A	5|C7139824:924-933|-	N/A	0.49	0.38	0.99	TGCATACATGCATCCATTAAATAATGTCAAACATTTCTCTTTGTCGTTTAGTCCCCACTGTTATGCTTCTTTACATTGCAGTGGGAGTTTGGATGAGGTGGGAATCATTTGTTGTTAATCTGAACGACTTGGTCCCTACCATAAAAGTTAATTCCTTGTTGATAACTTGTTATTTTGTTATCTTCTTGGCCCCATTTTTT	AAAGGAACAGATTCTATTTGTTCTTGTATTTTAGATTATACTAATTCATCTTGCAGATTAACATTTAATCTCAAAACTATACTTTGCTCATTCTACTTTATTTGGTTAGGTATAGGACATGGTCTCTCATGGCCCAAACTCTTGTTTTGATTTGTTGTTGATCTGATTATCTGTGTTTGAAGTTGTGTTTCTTCAGCCTA	TGTTATCTTCTTGGCCCCAT	56.477	20	100	100	GTTTGGGCCATGAGAGACCA	59.962	20	100	100	176	233	408	TGTTATCTTCTTGGCCCCAT	56.477	20	100	100	GGCCATGAGAGACCATGTCC	60.179	20	100	100	171	233	403	TGTTATCTTCTTGGCCCCAT	56.477	20	100	100	GGGCCATGAGAGACCATGTC	60.179	20	100
nSSR_168	AAT	5|C6155163:290-704|+	4|C6116211:614-625|+	5|C5286360:653-667|-	5|C5344498:500-514|+	5|C6083167:1500-1514|-	N/A	5|C6999840:606-620|-	5|C5623761:497-511|+	0.35	0.12	0.99	AGAAAATAAAAAGGACAAATAATCCGGTAACCATCACTATGGACACTCCTTAGCTCATCATCTAAGATATTGCAAGACCACTAATTACAAAGCCCAGAGTTATTACAATCAAATTCACAATAACTCAAAAGACCTAGAAACCAAATCAATCACCTTAAACTGGAAACAAGTCCTCATCTTTTATTTACAATAACAACAAC	TTCGAAAAATCAAGCCACCTATCAAAACACCAACCTAAATCATGTCCTCAAATTTGGAACCTACCAACAGCTATCCTTCCCAAAAGCCATAAAAACAAACATTAGGAAACCAAAAATAACCACAAGATCATCAAATTCACATTTTTATACCCCAAAGAACCCATCAAAAGAACCACAAGATCACCAAAGGAAACCAAAGA	ACTGGAAACAAGTCCTCATCT	56.563	21	100	96.83	TGGCTTTTGGGAAGGATAGCT	59.359	21	99.2	100	146	358	503	ACTGGAAACAAGTCCTCATCT	56.563	21	100	96.83	TGGGAAGGATAGCTGTTGGT	58.331	20	100	98.33	139	358	496	ACTGGAAACAAGTCCTCATCTT	57.286	22	100	96.97	TGGCTTTTGGGAAGGATAGCT	59.359	21	99.2
nSSR_1680	TA	6|C6129811:315-726|+	6|C6160487:307-318|+	N/A	N/A	8|C6022109:186-201|+	6|C6357404:901-912|-	4|C7004172:478-485|-	5|C5640351:560-569|-	1.21	0.25	0.99	TCTCATGACATGTTAAAATTTCACTCGTCTCATTGTTATGATATCATTACTCGACATTATCATTGTTGTCATTACATTTTTGTTTGAGTGCTAGGCTTTTGTGCTCTTGCACCTTGTTTTCCCTGACATGCGCCGCATTTCATATTTAAAAATCAAATGAAGAGCCATTGTAACCCATGATCACCTACATGGACGTGTAT	TTTTTGAAGCAGAAACAAATTCAATAAGATCTAAACAAGTGCTAGTGACATTAGAACACAAACACTTTCAAACTAATCCACTTGTTTGTGACAGGGAAATAGTTGTTACCATCTTCACACTTGTGTTATTATATTATAGATTTCAATGGAGGACACTTGGTTGGTCAGAGTAGCAAAGCAAGATGACATAATAACTAACG	CCTTGTTTTCCCTGACATGCG	60.068	21	100	100	TCCCTGTCACAAACAAGTGGA	59.438	21	100	100	198	311	508	CCTTGTTTTCCCTGACATGCG	60.068	21	100	100	TTCCCTGTCACAAACAAGTGGA	60.026	22	100	100	199	311	509	CCTTGTTTTCCCTGACATGCG	60.068	21	100	100	CCCTGTCACAAACAAGTGGA	57.949	20	100
nSSR_1681	TA	6|C6131021:706-1117|+	5|C6214979:248-257|+	N/A	N/A	6|C6051399:704-715|-	6|C6369926:767-778|+	N/A	4|C5655537:281-288|-	0.8	0.38	0.99	ATCTTTTTCTGTCTTGCTGCATTCTTAAGTTTTCCTTAGAAGGATAAACAATGACAATAGAGTTGCATGATAACATCATGGTTGCTCAAAAATCAAATTTACTATTTTGATTCAGGTCTATCTATCACCAATGTTTGACTTGGTTTGGATCATTTATCGGGAAATGCTCTATAATAGTTGTCCAATTTTTCGACTTTGTC	CATCAACTCTGTTTTGTTTTCCACTATTAAATTGTATACATGAAGTGATGACCATAATGTGAAATTCTCGTCCACATACAAATCCTCACCAGTTTTTATGGAATAACCAGCAATTGCTGTCATCCAGGGATGTCAACTCTCAGACCTCCAGCTTCAGATAACAAATGAAGATGAGATTGATACTCTCACGAAAGCCACAA	TGGATCATTTATCGGGAAATGCTC	59.238	24	100	98.96	CCCTGGATGACAGCAATTGC	59.541	20	100	100	196	345	540	GGATCATTTATCGGGAAATGCTCT	58.994	24	100	97.92	CCCTGGATGACAGCAATTGC	59.541	20	100	100	195	346	540	TGGATCATTTATCGGGAAATGC	56.883	22	100	100	CCCTGGATGACAGCAATTGC	59.541	20	100
nSSR_1682	TA	6|C6131219:250-661|+	6|C6235885:267-278|+	6|C5080273:240-251|-	6|C5340876:689-700|-	N/A	7|C6298810:396-409|-	N/A	N/A	0.4	0.38	1	TATGGGAGGCCGCCGTGACTAGCAGAATGCCGACAACCCAAATAGGCAGCATACGGATGATTGACTTGAGCTCTTCCACTCGGTGCACGGTCGATAATCTCCAGAGCTTAGGCATGCCAGAGCTCAGCATGTCACGGTCAGTCATAATGGCAGCTCGGTCAAAGAACCTTCATAATTATCAAATTAAATGTTAGCTTATT	AGTCTAGATCTCATGTTTTTAGAAACATCGATCACTTACATGAGCTGGTTAGTGTGGAGGAGTCTTCCAGTGACTGAAATATCAGCATCCAACTCCTTGTTCTGGTAGAGAAGGTTTGGGTCAGAAGGCACGACTGCCTTTCTCTTCTTGAAGGCTGCAACCACAACCTGGGACAACCGGATCAGAGGACTACCTCCAGG	ATGGCAGCTCGGTCAAAGAA	59.963	20	96.25	100	GTGCCTTCTGACCCAAACCT	60.179	20	100	100	197	346	542	AATGGCAGCTCGGTCAAAGA	59.963	20	96.25	100	GTGCCTTCTGACCCAAACCT	60.179	20	100	100	198	345	542	ATGGCAGCTCGGTCAAAGAA	59.963	20	96.25	100	TCGTGCCTTCTGACCCAAAC	60.534	20	100
nSSR_1684	TA	6|C6131357:679-1090|+	6|C5908586:240-251|+	6|C5330730:347-358|-	6|C5329580:298-309|-	6|C6000973:347-358|-	N/A	5|C6987626:476-485|+	5|C5672193:523-532|-	0.45	0.12	0.99	AACTATATATTTTTTTAAAGATTTGAGAGACCAAAATAAACAATGAAATCCATTCCACTCAACTTGAGGTTTTTTAAAGAAAAAAGTTTTTGTTGGCAGCACAGTGACTCTACTTGAGTTACTTAAATCACAAACAAACCCTAATGGTGGCTTAAAAAAATATATAAAAATCATATAAAAGTGGTAATGAGATCAGATTT	TTCAATTGAATTGGAGGAGAAGGAATCAAACAAAATGGAAAATTAAAGTATGATGAAGAGAAGAAGAGGCAAGTGCAGAGTGCAAAGATGAGAAGTTAAAATAAAATAATGGGAAAGGTCCAAGATGAAGGAATTTAAAGGCAAAAGATGGATGGGGCATTGCCAATTACTCACTATGTGTACCTCACAAGTACTCAGAA	TGGCAGCACAGTGACTCTAC	59.682	20	100	100	ACTCTGCACTTGCCTCTTCT	58.945	20	100	100	200	293	492	GGCAGCACAGTGACTCTACT	59.394	20	100	100	ACTCTGCACTTGCCTCTTCT	58.945	20	100	100	199	294	492	TGGCAGCACAGTGACTCTAC	59.682	20	100	100	ACTCTGCACTTGCCTCTTCTT	59.581	21	100
nSSR_1688	TA	6|C6137561:289-700|+	7|C6197103:636-649|+	N/A	7|C5328954:544-557|+	6|C5879496:431-442|+	N/A	N/A	6|C5758753:925-936|+	0.49	0.38	0.99	CTGTGCACCCAACCAATCACATTCAGCTCACAGCTTTTGAAGAGGCCACAAACAACTATAGAATGATGGAGGCTTCAGTACCTTTTTTACTGCATGGAGAAGGACCCACTGCATTCTCTCAGGTCTGCATTAATTGACTGAGTTCCAACTAAACAAATGTTTAAACTTTAAAGATATATATATGGGTTTTATGTATTTAT	TCTCTCTTCATGACTGCAGGATAATAGTAGCTCTCTCATGCAAGTGGGTGGTCAGAGTCCTCAACAAGGAGGGTTTCTTACTCAACTTTTGTCCAACAGCATGCTCTCTTTCCACTAGTGTTCAAGAGAGAGCCTCATGAACACCTTGTAATGTCTAAATTCAATACTTTTGCTTGCCCATTTATACATATATACAAGAA	GGAGAAGGACCCACTGCATT	59.67	20	100	100	GGACTCTGACCACCCACTTG	59.965	20	100	100	177	295	471	GGAGAAGGACCCACTGCATT	59.67	20	100	100	ACCCACTTGCATGAGAGAGC	60.036	20	100	100	166	295	460	GGAGAAGGACCCACTGCATT	59.67	20	100	100	GACCACCCACTTGCATGAGA	59.963	20	100
nSSR_1690	TA	6|C6141399:485-896|+	6|C6158273:534-545|+	6|C5209871:605-616|-	6|C5362584:780-791|+	N/A	7|C6301828:605-618|-	5|C6951750:366-375|-	N/A	0.58	0.25	0.99	TCAGCGCGAGAGCCGCACATTCCTGCCGCACCACCATCAGCACCACTTGCAGCATCGACTGGGAGCTTACCACATGATACACCCGTTGCATCCGCAACGACACCAACCTTAGTGGAATTCATGGATTTGTATCACATTTTTGTTTTCCAGTTAGCAAGGGTCCACCCCTACTACATTTTTTCATGTTGACTACATCCTTT	TCTACTCTTCATTTTCATTGTGCGGTTGTGGTTTGATGTCCTCTTCATATTTGCAGGAGTTTATATAAATTGTTAACTGGAAGCCTCCTCACCATCCCCCCTACTTCTTATTCGCACAATGAACGACAAACAACTGGGGAAGTTTCAATTTACCCATTTCCTCTTTTTATATTATTTTCTTATCTTTTCCATGTTATATT	TGATACACCCGTTGCATCCG	60.461	20	100	100	CATCAAACCACAACCGCACA	59.616	20	100	100	176	274	449	AGCATCGACTGGGAGCTTAC	59.538	20	99	100	CATCAAACCACAACCGCACA	59.616	20	100	100	200	250	449	TCCAGTTAGCAAGGGTCCAC	59.309	20	100	100	GATGGTGAGGAGGCTTCCAG	59.82	20	100
nSSR_1692	TA	6|C6147773:153-564|+	6|C6232035:1599-1610|-	6|C5264076:577-588|+	6|C5373588:614-625|+	N/A	N/A	10|C7138350:1993-2012|-	N/A	1.6	0.38	0.99	TTGGCGCTGCTTACTACCTCATTGTAGGAAACTTCAATTCATGGACACCAGAGGCTGAACAGGGTAACCTCTTTGCTTCCCATTACTTGGTTTCTCTCTGTTAAATTCATAGAATGGATCTAAATGCCGTTGTTCCTTCCAATATATTTCGTGAGTTCTACTATAAGAAGAACTTTTAGATTTTGTTTTTCGATATGCAC	TTATTTGCATTCATTTTTTTTAGTAGTTTGATTGAAGTCTTCTCCTATTTCAGACTCCTTGTCATTGGAGAAACAAGATGCATTGAACATCAGGCCTTTCAAGAAGGAATTGGGTGTTGATAAACCTCATCAAAAGAAAGGTAGCTTGTGTGAGAGAGTACTTGATCAAGGAATTGAGACTTTTTCTAAATTCAATTAAA	AATGCCGTTGTTCCTTCCAA	58.301	20	100	100	AAGGCCTGATGTTCAATGCA	58.073	20	100	95	188	274	461	AAATGCCGTTGTTCCTTCCA	58.301	20	100	100	AAGGCCTGATGTTCAATGCA	58.073	20	100	95	189	273	461	AATGCCGTTGTTCCTTCCAA	58.301	20	100	100	GGCCTGATGTTCAATGCATCT	58.97	21	100
nSSR_1699	TA	6|C6161041:408-819|+	6|C6011972:481-492|-	6|C5338979:665-676|+	6|C5394426:1676-1687|+	7|C6017059:536-549|-	N/A	N/A	N/A	0.4	0.38	0.99	CATGAGGGGATAAATGGTTAAAAACACTTGGATATGAGAGTGAATAAACAGGGTCTTGAGGATATAGTGGGATTTGCTTGAATAAACAGTAAATTTCAAAATTATTTTCCATCTCCCACTTGACTCTCTGGTCCATGATGTCATGACAGACATCCCCAGGACAAATATCTTCATGTCAAAGCATAACTCTTCACCTATTT	AAAGGTACCATATCAATGGAAATAAGTGATGAGTGCATTCATAATATACTTTAGTTTTCCCAAAACACAACAAATTAGATGACTCCATTGCTTATTCTGTAATAGAAAATCACAAAAGAATAAAGGAATTCATATAGATTAATCAAAACAATTCCCTCTATGACAACTCTTATAATACATCCAATCATATTGTAAACGAA	GACAGACATCCCCAGGACAA	59.016	20	100	100	CAGAATAAGCAATGGAGTCATC	54.972	22	100	100	167	344	510	TCTCCCACTTGACTCTCTGGT	59.852	21	100	100	CAGAATAAGCAATGGAGTCATC	54.972	22	100	100	200	311	510	CATGACAGACATCCCCAGGA	58.793	20	100	100	CAGAATAAGCAATGGAGTCATC	54.972	22	100
nSSR_1702	TA	6|C6162409:703-1114|+	N/A	6|C5083461:255-266|-	N/A	4|C5992073:908-915|+	6|C6174932:349-360|+	7|C6995752:445-458|+	N/A	0.98	0.38	0.99	GTTGCTTGTTGGTGGTGGCCTTGCACTCTTGGGCTAGGCAAGAGGCAGTGCTTAATTATGTTCATTAGACTACTTATTTGATTCCATCCATGTGTTTGTGGTTTTGTATCATGGGACTTTGTTTATGAGCTAGCCAGCCAGCTTTGTTATTTGTGTTAATTAATAAGATGCATGATTTCTTTGTTTACTGTTGGTTTAAT	TTTGATAATTGGTCTTTGAAGTTGACTTTGCTGACTGCCAACTTAACTAATTAGAACACAAATTAAGCAAAGGCCAACTACTCTTTTAATTATTTATATGTATGTGTTACATCATTGAGAGCCGCCTTGAGATTGAAAATTTGAATCATATAGAAATTAAGTAGATGTTATCATTGCATGAGGAAGAGGAGTTGGTATCC	GCTAGCCAGCCAGCTTTGTT	61.247	20	100	100	GCAGTCAGCAAAGTCAACTTCA	59.644	22	100	100	122	328	449	GCTAGCCAGCCAGCTTTGT	60.677	19	100	100	GCAGTCAGCAAAGTCAACTTCA	59.644	22	100	100	122	328	449	GCTAGCCAGCCAGCTTTGTT	61.247	20	100	100	AGAGTAGTTGGCCTTTGCTT	57.041	20	98.75
nSSR_1703	TA	6|C6163193:648-1059|+	N/A	6|C5277810:627-638|+	7|C5323586:346-359|-	6|C6082665:1284-1295|+	12|C6354058:814-837|+	N/A	N/A	2.33	0.38	0.99	TTCACCAATTACATGTGTATTTACCTATTTAAACCACCGGACTTAGATCAATCCTATGACATGATTCAGTATAGCTCTAGATGAGAATTTCACTCCACTTACCATGTTCCTGAGTCTTAGAGTGACAAGCGTACCCTCAGTGGACTCTAGAAGCTCCTTGAGACCCTAAGTACGAAACGACTAGCCCCTTATGAGAATTT	TGTATGTAGGGCATCCCTAATAGATCCGACTTTCCGGGTAACCAAAGATTAATATAGAGTGTAGATCTCCCTTCCTGAGGGATGCACATCCTGGCCAGGTACCGGAAGGTACCGGAATACCCAACTACTTAGGAGGTTGCAACTCTACTTATGCGCGCTCATGCTTATAAGGGATTTTTCAACTTGAGGGGTGCCTACTT	ACGAAACGACTAGCCCCTTA	58.451	20	98.75	100	GCGCGCATAAGTAGAGTTGC	60.043	20	98.75	88.75	199	371	569	TACGAAACGACTAGCCCCTT	58.451	20	98.75	100	GCGCGCATAAGTAGAGTTGC	60.043	20	98.75	88.75	200	370	569	TGACAAGCGTACCCTCAGTG	59.683	20	98.75	100	CTTTGGTTACCCGGAAAGTCG	59.198	21	100
nSSR_1708	TA	6|C6169861:894-1305|+	N/A	N/A	5|C5363668:337-346|+	5|C5976413:536-545|-	5|C6385310:1609-1618|-	N/A	4|C5449601:353-360|+	0.63	0.38	0.97	TGCCTGATTTTCAGCATATATTGATATATTCACTCAAACAATTAAGAGACTACTGATTTGGAATTATGAAGGTATATGGCCGGAATCAAGTAGTTTTGCAGATAAGAAAATGGGACCTATACCTAAACAATGGAAAGGAATCTGTCAAGTTGGAGATGCCTTCAATTCATCCAACTGCAATAGGTGATTGCTGAAACCTC	TCTTCTCATGTATATATCATTATATATCATCCATCTATTCTAGTAGTACATGTGCTGTTTCAAACTTACAGAAAGTTCTTAATTACCAAGAGTTGTAGATATAAAATCATATTAATTTGCAAAGGCAAATTAAATACTTATCTAAGTCTGAAGAGTCACGTTCATCCAACCCAACTTGTGATTGTTTTGAATATATGGAC	AGGTGATTGCTGAAACCTCT	56.738	20	98.75	100	TGGATGAACGTGACTCTTCAGA	59.109	22	100	100	199	381	579	AGGTGATTGCTGAAACCTCT	56.738	20	98.75	100	GGATGAACGTGACTCTTCAGACT	60.057	23	100	100	198	381	578	AGGTGATTGCTGAAACCTCT	56.738	20	98.75	100	GGATGAACGTGACTCTTCAGAC	58.753	22	100
nSSR_1709	TA	6|C6178576:465-876|+	6|C6180847:568-579|+	N/A	7|C5388350:597-610|+	6|C6051683:1084-1095|-	N/A	9|C7125322:1169-1186|-	N/A	1.17	0.38	0.99	GTTTGATTGTTCCTCCTCTCTTCCCGGATACCTTTCTCTTCCCTTTGTGGGTTTGGTGGGGAGAGGTTGATGCTTCTCCATCCACAGGCAGAGAAGAAGATAGAGCAGGAGCAGGTGACATGGTTTCTAACTGGTAAATGTAGGTTTCCATGAAGACTAGCTTGGGACTCTTGTGGGATTCATGCATCTCCTCAAATGGT	AAGATGCGTAGAGAGGAGATAGAGTGGGGATTTGGTGGGGCTTCTTTTGTTCTCTCTCTTCTCTGTTTGCTTTCAATCTACAGACATGTACACCTATTAGCTCAAGTACTCGTTGTTGTAAACTCTAGCTTGTAGCTAGAATGAATACTATTATATGGGACATTGAAGTACAATCATGCTGTCTGTTTGCTGTTCCTGGA	CAGGAGCAGGTGACATGGTT	59.963	20	100	100	AAGAAGCCCCACCAAATCCC	60.252	20	100	100	153	305	457	TCTCCATCCACAGGCAGAGA	59.958	20	100	100	AAGAAGCCCCACCAAATCCC	60.252	20	100	100	184	274	457	TAGAGCAGGAGCAGGTGACA	60.252	20	100	100	AAGAAGCCCCACCAAATCCC	60.252	20	100
nSSR_1710	TA	6|C6184206:104-515|+	N/A	6|C5034551:357-368|-	6|C5391258:409-420|+	6|C5961407:672-683|-	N/A	5|C7105900:900-909|+	N/A	0.4	0.38	0.98	CTTTCACCTTTTCAATTTATTTTCTTTGAGATAACCGTAGCTCTTTGGACCTTCTATCTCACTGAAATTCCATGCCAAGAATCAGTTTTGTAGCACATAGATCCTTCATATCAAATTCATTACCCAACCTTGGCTTTAACAAGTCAATATCTGACATATTCTTGGCATTAATCAACATGTCATCCACATAAATTAACAAG	TGAACCATGATGAAGAACTTGAAAATAAACCCAACAATCATACTAACAATGAGTATATCTGCTCTTCATCATGCAAGAATCAAACCTCTTGTACCACACTATATATCTTGGTAACTGCTTCAGTCCTTATAGTGATCTCTTTAAACATGCAAACATGGTTCTCCTTTCTAGGTCCCTTGAAACCTTCGGGGTACTCCATA	CCAACCTTGGCTTTAACAAGTCA	59.617	23	98.8	97.83	TCTTGCATGATGAAGAGCAGA	57.378	21	100	100	167	226	392	CCAACCTTGGCTTTAACAAGTCA	59.617	23	98.8	97.83	TTCTTGCATGATGAAGAGCAGA	58.053	22	100	100	168	226	393	CCAACCTTGGCTTTAACAAGTCA	59.617	23	98.8	97.83	TCTTGCATGATGAAGAGCAGAT	57.848	22	100
nSSR_1711	TA	6|C6185508:806-1217|+	6|C6235083:717-728|-	N/A	5|C5380576:1372-1381|+	6|C5983937:679-690|-	5|C6232258:310-319|-	N/A	N/A	0.49	0.38	0.98	TTTCTTCTCTTCTTCGAAGGCGTCGCCGAGGTGGTCGCGCTCGGACTCGGGGCGCACGTACTCCGTGGGAATGGAGTCCAGGCCGCTGCTTGCGAGGCTCTCCACTCTGGGAACAAGAAGCACCTTGGTGGCCATTGGAGCTGTGATAGATCACTGGTCCTGTTGAAGTACTACTACTGATGATCTCTTGCATAGTGGTT	GATGGATGAAGAACAGATGGTAAGTGGAGCACATCCTTTGTTAGAAGTCAAGAGAGAGAGAATCTTGTTTGGTTGGTAGAGTAGAGAATGGAGGTTAAGTACTTAAGTGAGGATGTGCACCGGTTGCCATCTCTCCATCCATCCATCTATCATCTATGAACCACCATCCACAAGGACCACAACCAACCAAACAAGATTCT	GAGGCTCTCCACTCTGGGAA	60.616	20	100	100	TGTGCTCCACTTACCATCTGT	59.022	21	100	100	152	293	444	GTGGCCATTGGAGCTGTGAT	60.682	20	100	100	TGTGCTCCACTTACCATCTGT	59.022	21	100	100	118	327	444	GCTCTCCACTCTGGGAACAA	59.313	20	100	100	TGTGCTCCACTTACCATCTGT	59.022	21	100
nSSR_172	AAT	5|C6173334:390-804|+	5|C6238633:962-976|-	5|C5296090:1132-1146|-	N/A	N/A	5|C6218720:312-326|-	N/A	7|C5741465:1040-1060|+	0.8	0.38	0.99	ACTGAGAACCAAAAGGATTTGGGCTTCCAAAGGGTTTAGGAGCAAAGGGATTATTGTTGGGACTGCTTGTTTGCCCAAACACAGAGGAGCTGAATGGGCTACTTGAGGACTGCCCAAAGGCTGCATTCCATAAGAGAATCAGTCAGAACAAGGGGAAAAAAAACTGCATACCAGGGAAAAACAGCTGTAAGCACCAACAC	AAAACGTCCCCTTGCTGCTCATCCGCAGCAAAAGATAAACTTTGTCCGGATAAGCAAGCAAACTAGAACATCAGTGAAGGAAGTTTCCAATCCAAAAGATCATCTCTTTTTATAATGCCATAGAGATCAAACGATGTATCAACGGTGAAAAAGCACGTCTGTTATTTACGAAATGGAAGATCGAGGAGCTAGATTCATAT	ACTTGAGGACTGCCCAAAGG	59.889	20	100	100	TCTTTTGCTGCGGATGAGCA	60.606	20	100	100	150	300	449	ACTTGAGGACTGCCCAAAGG	59.889	20	100	100	ATCTTTTGCTGCGGATGAGC	59.263	20	100	100	151	300	450	GTTGGGACTGCTTGTTTGCC	60.249	20	100	100	TCTTTTGCTGCGGATGAGCA	60.606	20	100
nSSR_1720	TA	6|C6198198:989-1400|+	N/A	6|C4971204:299-310|-	5|C5296320:442-451|-	5|C5776385:258-267|+	N/A	9|C6928080:198-215|-	7|C5516991:263-276|+	1.37	0.25	0.98	CCATAGATCTTGTATCTTGTTCGGAGAATCCCATCCCAAGGATCTATGAACCAAACGACAAAGAATCAAAATTATAACATAGATGTAACCAATTCATGTTTGCTGACATAATGAATGATATTCAAGAGTAATAATTGGCTGAATTGTCAAACATTTTGGTGGCTTTTTCATATAAAATTGTTGATTCCATGCATGTGTGC	GATTATGTACGTACATCGATCACTCCCGCTTGAGACCTTTGGGTACTTGCCTTTTATTTAAAATGGTGAAAATTATGACTTTTATTTGATTAGTTTGTTTGTTTGTGTTTTAAGGTGTGTTGTATTGAATTTTGATATGTATAATTTAGAACTCAATATTAAAGGAATTTTTATAAAACATATGGGATGATTTCTCTGCT	TGTCAAACATTTTGGTGGCT	56.339	20	100	100	AAAGGTCTCAAGCGGGAGTG	59.965	20	95	100	108	344	451	TGTCAAACATTTTGGTGGCT	56.339	20	100	100	CAAAGGTCTCAAGCGGGAGT	59.965	20	95	100	109	344	452	TGTCAAACATTTTGGTGGCT	56.339	20	100	100	TCAAGCGGGAGTGATCGATG	59.897	20	97.5
nSSR_1721	TA	6|C6198444:272-683|+	6|C6148675:598-609|-	N/A	N/A	N/A	6|C6209024:259-270|+	7|C6888332:261-274|-	6|C5741423:1325-1336|-	0.4	0.38	0.99	TATATGAATTCAGCTTACAGGAAATGAAATGAAACAGTCCAGAAGGATTGGTGAAATGCAATATATTGCCTGTTTCTCTCTCGTGGATCACTGGCTTTGGGATGGACACCAGCCAATTCCAGTAATTATATCAAACAACCAAAGCCAATGTACGCTATCAGGGGCAATTAGGTATCTTTTCTCCCCATGACATTACTCTG	GATATTTCACTGGATTTTTAGCTCCAACTGTTAAATCAGCTCTTTTCTGCAGTGATTTCAGTTTCTTCAATCCAAGCCCCTTTATCTGGCAACCATGGGAATAGTTTTTCTGCTATCATTATGTCTAATGCTTGAAATGTGATAGATGGTTAAACAAGCACCTTTCTTGGAGCTTTCTTTGTTCAATTGTTAGTCTAGTG	TGGACACCAGCCAATTCCAG	60.251	20	100	100	GCCAGATAAAGGGGCTTGGA	59.741	20	97.5	100	200	302	501	GGACACCAGCCAATTCCAGT	60.251	20	100	100	GCCAGATAAAGGGGCTTGGA	59.741	20	97.5	100	199	303	501	ACAACCAAAGCCAATGTACGC	60.001	21	96.4	100	GCCAGATAAAGGGGCTTGGA	59.741	20	97.5
nSSR_1722	TA	6|C6200532:39-450|+	5|C6189777:429-438|+	6|C5228891:463-474|-	N/A	N/A	5|C6376188:821-830|+	3|C7138912:2081-2086|-	3|C5530387:363-368|+	1.25	0.25	0.99	CAAAGTTTCATTGTGCAAGCTATCAAATTCTGAAGAGGTCGTAGTGTGGTCTATAATTAACATTAAAATTCAAATTTTAGTGATACTAACTACTATCTTGTCACGAGAAAAGTGCATACAGCATTCTTTGTCTCTGATGATTGGTTCATATCCCTTTATGACTGTCAAGTGAGGAGTGGTGTTCATTATCTTATCTTTGG	AACCCAATTATAATTTCTTGATAGGTGAAGGGTGCTCTGTGAGTCTGCAGTTTGACTGTAATAATCCAGGATCTCCAGAGCTTCCATATGGGCCATTTATTGTTTCAACCTGCGTTGCTTATTGTGATAAAACCCGAGCAATGTGCTTTTGTGGAGAAGGAACAAAATATCCGAATCGTCCTTTGGCTGAAGCATGTGGT	CTGTCAAGTGAGGAGTGGTGT	59.586	21	100	100	ACTGCAGACTCACAGAGCAC	59.967	20	100	100	102	199	300	ACTGTCAAGTGAGGAGTGGTG	59.586	21	100	100	ACTGCAGACTCACAGAGCAC	59.967	20	100	100	103	198	300	TGTCAAGTGAGGAGTGGTGT	58.504	20	100	100	ACTGCAGACTCACAGAGCAC	59.967	20	100
nSSR_1724	TA	6|C6202238:73-484|+	N/A	4|C5235305:309-316|+	4|C5373054:1156-1163|-	4|C5811763:362-369|-	N/A	N/A	4|C5687393:246-253|+	0.8	0.38	0.99	ACACATGTAAAACATTTGTATCTTTTTGCATGCATTCAGCATTACATTCACCAACTCATCCAATTTTATACAACATAAGACAGTATTATTTTGAGTGATTCTTCAAGTGGTTCATCCATTATGTTTCAGAAAAAATAAAAAAACTTGCAATAAAGATTTATAAGCTGCTGAAGACAAAGATTTAAAGAACTAAATAAAGC	TTTGATTTCTCTGAATGAGTTTATTTGCTAAGCCTAACCTACAATTAATGAATCAAACTATATATGAACTGTACTAACTAACTACTGAAGAAATAAAAAGAAACTAGCATCTAATTCATTCCTAATTACTTCTTCTTCTTGATGTTGGTTACCAAAGGGCTTCCAACATGATGCTTCCCATCAGACCATACAAGTGTTCC	GTGATTCTTCAAGTGGTTCATCC	57.698	23	100	100	TGTAGGTTAGGCTTAGCAAA	53.967	20	100	100	161	166	326	GTGATTCTTCAAGTGGTTCATCC	57.698	23	100	100	TTGTAGGTTAGGCTTAGCAA	53.967	20	100	100	162	166	327	TTCTTCAAGTGGTTCATCCA	54.477	20	100	100	TGTAGGTTAGGCTTAGCAAA	53.967	20	100
nSSR_1727	TA	6|C6204430:1576-1987|+	4|C6225813:212-219|-	6|C5337509:1744-1755|-	6|C5340108:437-448|-	6|C5863310:207-218|-	N/A	7|C7058344:527-540|-	7|C5597615:457-470|-	0.93	0.12	0.99	ACACAGTGGTCCTGATGGCAGGTGACAAGCACATGCACACCAATCTGCTGATGTTATCTAGATCCACTCAACATATCATTTTGGAGTGAGTTATTTTCAGTATTGCATGTGTATTAAAATTTTCCTGTATTTACAAACAATTAAAATGAAAATTTGTATTTAAAAGTTTATTTGTTTTTATCATTAAGAAATTATTTATT	GTATTTTTTTTACAGTAGTTGAAGTGAGTAACTGTCTTGTTTTGTTTTGGTTCTTAAAATGGAAAATAAAGTTTGTTTTGTCTCTTGAAGTAACAAAATTTAGTTATTTTGACATTTTATTTGACAACCTTAGCCACGTGAAATTATGTGCACATATATGCCCTATTGTATTTAGGTGGTTTTGTTTTTGGATTTGTAAG	GCTGATGTTATCTAGATCCACTCA	57.662	24	100	100	CAGTTACTCACTTCAACTACTG	54.229	22	100	100	200	246	445	GCTGATGTTATCTAGATCCACTC	56.066	23	100	100	CAGTTACTCACTTCAACTACTG	54.229	22	100	100	200	246	445	GCTGATGTTATCTAGATCCACT	54.876	22	100	100	CAGTTACTCACTTCAACTACTG	54.229	22	100
nSSR_1729	TA	6|C6206062:287-698|+	N/A	7|C5017239:188-201|+	6|C5373314:660-671|-	6|C6013921:961-972|+	N/A	10|C6997746:436-455|-	N/A	1.55	0.38	0.98	CCACTCTATTCCCCCAGGCGGGCGACCGCAAGGAGAGGAAGGAGATGATGAGGAAAAAGGAATGTGATCTGACTGGAGACCCCTGCTGGGCCTCATCAATCTGCTAGCCCCCACCATTGATTGAGTTCCTTCTTGCTGGTTGGTTCTACTGCCGTCCTGGTTTAAGACATAAATATATAAATATATACTATATACAGTAG	AGAAGAAGGCCTGGAGTTGGTAGATGGGATGACTCTGAAGAATCAAAGAATGGGATTTGGCGGGATCCCAATCGTATTTTCGACGGGCCTTCTGGGAAGTCAAAATGGAGTTTAATTCTATCCGCACGTGTCGATCGAGTTGCCTCTATGGTGTATATTGGTCGTTCCTTCAGGGTCCAGCTGCAGCTGGGTGGTGATGC	TGCTGGGCCTCATCAATCTG	60.107	20	100	100	TCCCGCCAAATCCCATTCTT	59.665	20	98.75	100	194	283	476	TGCTGGGCCTCATCAATCTG	60.107	20	100	100	ACCAACTCCAGGCCTTCTTC	59.598	20	100	100	150	283	432	CTGGGCCTCATCAATCTGCT	59.817	20	98.75	100	TCCCGCCAAATCCCATTCTT	59.665	20	98.75
nSSR_1733	TA	6|C6211492:670-1081|+	7|C6153897:520-533|-	6|C5301950:946-957|+	N/A	N/A	N/A	6|C7117154:228-239|+	6|C5761527:1418-1429|+	0.4	0.38	1	ATGTTGATGTTGTTATCTTGGAGACATGAGCTAGTGCATTGGCGTGATTTGTATGTTAACACAGTTTATTATTCTTTTGGTTATGGTTGATGTAGGTTTGGACCAAAGAGTTGGTGTTACTGTTATTGCTGCTACTAATCGTCCTGACAAGGTTGATCATGCCCTTCTGAGACCAGGTTCTCCCTTGACTGTCATTCAGC	ATACCTAAAACTTGTGTAGACAATTTATCCAGTGTCCGCATTTAATCTATAGATGCTAGAAGATCAACCTTCATACATCCTGAGAAATAGTGTATTTCCTGGTACAGGACGCTTTGACAGGTTGTTAGATGTCCAGCCACCAAATGAAGCTGATCGCAAAGATATATTCTGCATTCATATGCGTAGCATGCCCTGCAGTT	GCCCTTCTGAGACCAGGTTC	60.036	20	100	100	AACCTGTCAAAGCGTCCTGT	59.82	20	100	100	175	360	534	GCCCTTCTGAGACCAGGTTC	60.036	20	100	100	ACAACCTGTCAAAGCGTCCT	59.82	20	100	100	177	360	536	GCCCTTCTGAGACCAGGTTC	60.036	20	100	100	CAACCTGTCAAAGCGTCCTG	59.412	20	100
nSSR_1734	TA	6|C6211802:2027-2438|+	6|C6184027:639-650|-	N/A	N/A	6|C5945769:271-282|-	7|C6269060:312-325|-	8|C7045954:701-716|-	N/A	0.8	0.38	1	GCCATGGCCTTGTTTTTTCTGATTTACAGGAACACAGTTCCAGATTTGCAGATGAGGATGTGAAGAGATCCAAATGGTTTTCCATGGGAAAAAGCAAGTCTGAAGAAGCTGGAGAAATTGCATTTATGACTGGTCTTCAAATACTGGATTTTCTACTTCATGAGGTAGTCAGTGACTTGTTGTATCTCAACTAGAAATTG	AATGTATTTCTTTGTCAAAATGAAACAAATACAAAGTGGTAAATGTCAACATGTATTTCACCATCAATCTTCAATCAGGTTCTAAGCAAATACTTGAAATCAAAGTAAAAGTCAAGAGAAATTTAAAAATAGCAAGTTCAAAGACCTGAGCAATAATCAATAATAATCAATTGGTTAACAGAGGAACAAATCCAGCCGAC	GGTAGTCAGTGACTTGTTGT	54.954	20	100	100	GCTCAGGTCTTTGAACTTGCT	58.775	21	100	100	200	363	562	AGCAAGTCTGAAGAAGCTGGA	59.304	21	100	100	ACCTGATTGAAGATTGATGGTG	56.4	22	100	100	200	292	491	AGCAAGTCTGAAGAAGCTGGA	59.304	21	100	100	CCTGATTGAAGATTGATGGTGA	56.135	22	100
nSSR_1736	TA	6|C6213262:2119-2530|+	6|C6145729:195-206|-	N/A	N/A	6|C5939237:652-663|+	5|C6256352:381-390|+	N/A	5|C5477577:325-334|-	0.49	0.38	0.98	CACGAGAGAGGGTGTCTGGGTGACCATTTTGTCTCTTGGGTGATCCGTACCCTGGCATAGGGTGGTATGGCAGTTCCCTTCGGAATCTGTGTTGCCTTTATGGGCGTGCGTTGATTTTGTCATGTGGAGGCCGAGATTCAGGGTGTGCGTATAGTATGAGGTCGGCCTTACTACTATTCAAGTGTCGTCTAAGTTTTGCC	GAAAAAAACAAAAAAAATATACTATTTTCCAATATACTAATGAACAAGAAGCTCTAGATAACTTAGAATATAAGAACTTGACTATTAAACATTTGATGTTACAATTCTACACAATAATACAAGCAACCAAGAAAGGTTATTTATTTATCTATTTATCTATTTTTTTATTTATTTATTTTGGTATTAAACAATATGGAAAG	AGTGTCGTCTAAGTTTTGCCT	57.529	21	100	98.81	ACCTTTCTTGGTTGCTTGTA	55.08	20	100	85	169	380	548	TCAAGTGTCGTCTAAGTTTTGCC	59.442	23	100	100	ACCTTTCTTGGTTGCTTGTA	55.08	20	100	85	172	377	548	CAAGTGTCGTCTAAGTTTTGCCT	59.44	23	100	98.91	ACCTTTCTTGGTTGCTTGTA	55.08	20	100
nSSR_174	AAT	5|C6176586:1088-1502|+	4|C6132735:422-433|+	4|C5325542:926-937|+	N/A	N/A	4|C6007366:209-220|+	N/A	4|C5519517:205-216|+	0.4	0.38	0.99	TTGTAGACGGAAAGTAAGAGATGAGACTCGAGACTCTGGTGATCAAGTGGATTAGATGTACCGTTTATTCATTGGTTTGTGCGTTACTTGCATGTATAAATGATATTTTTTCGGTGTAATACCCAATTTTGATGTTAATAGTCCAAAAGAAGAGTTTGGCTAATATGAATGACCAATAAATGCCTTAAAACATAAAAAAA	TAATAAATAAAAGAAAATTAGGCCTGAAAAGAGACAATAACAAGAACAAAGATTCATGAATAGATATATTAGCTCAATACTTGAAGGCCCAGCAAGCATGGCCACAGATTGGAAAACAAGAAGGATGTCTTCTGAGAGGTAACTTGCCTTGCATTGATGATGATGCTCTGCTGTTATTTATTACTCTGCATTGCACTGCC	TGGTTTGTGCGTTACTTGCA	58.904	20	100	100	TTGTCTCTTTTCAGGCCTAA	54.178	20	100	100	180	272	451	TGGTTTGTGCGTTACTTGCA	58.904	20	100	100	TGTCTCTTTTCAGGCCTAAT	53.934	20	100	100	179	272	450	TGGTTTGTGCGTTACTTGCA	58.904	20	100	100	ATTGTCTCTTTTCAGGCCTA	53.934	20	100
nSSR_1742	TA	6|C6218540:576-987|+	4|C6157335:327-334|+	4|C5244617:221-228|+	N/A	N/A	4|C6373472:1165-1172|-	4|C6951342:524-531|-	N/A	0.8	0.38	0.99	AACAATGATAGAATTTGTATGGATATATGGCTTTGAGAGACGATTTAATCTATGTTTATAGACCTAAAAGATGTTGATTGATGTTTGGGAGTGGGTTTGATGTTAATAGCTATTGTTGTATTACATCCTCTCGAGAGTTATTGACTGATTTGGTTATATACTTGTAGGTCTTCAATAGTAAGGCAAGTAAAATATATCCC	CGTGGTCCATGTAAGGATCAATTTGAGTATAACGTGAAATTGGCTGATTTGGGTTTTGAAAATATAAATCTTAGATTAGGTAATCTCATCCTTGTCTTTGGTTATCGATTTGAAAAAAAATATGTAATTAAATTAGTAGATGTTGTTATAATTGTTAAAAACCAGTGCAATTTTTCAAGTCAAATACTCTCGGGCTCTTA	TGATGTTTGGGAGTGGGTTTGA	60.092	22	100	100	CCCAAATCAGCCAATTTCACGT	60.029	22	97.75	100	187	278	464	TGATGTTTGGGAGTGGGTTTGA	60.092	22	100	100	ACCCAAATCAGCCAATTTCACG	60.029	22	97.75	100	188	278	465	TGATTGATGTTTGGGAGTGGGT	59.89	22	100	100	CCCAAATCAGCCAATTTCACGT	60.029	22	97.75
nSSR_1749	TA	6|C6220524:909-1320|+	6|C6243271:678-689|-	6|C5332179:1803-1814|-	N/A	6|C6046215:1025-1036|-	5|C6398142:917-926|+	N/A	7|C5726827:724-737|-	0.58	0.25	0.99	CTACTGCATGAGCCTAATTAGAAAAGTAATTGCCTAAAGGGGAATATGTGCAAAAAAACATAAATGGGAATGGGAGAAGGGAGATGTACCCTTGTTTAATATGTATTTAATATTTTAATAAGTCATCGACAAATACCCTCATGATATTCGTGACCCGGACCCCACACATAGCGGGAGCTTTGTAGCTCCGGGATGCCATT	TTCCTAGGTCATGTTATAATCAGGGTGCTTCATCATTTTCCCCACTGAATAAAAAAACTACATTGAACATGTTCTTTGTAGGATGGCTAGATATTCCAGGTATCTCATTCAGTTTTCTAAAGAGGAGTTATTTGTCCTGGAACTGCTTGCCTTGTTTTTGGGAATCAATTATTGTTGGTCTCTTCTGTCCTAAAATGGCA	GTAGCTCCGGGATGCCATTT	60.179	20	100	96	CAAGGCAAGCAGTTCCAGGA	60.538	20	100	100	185	381	565	GTAGCTCCGGGATGCCATTT	60.179	20	100	96	AAGGCAAGCAGTTCCAGGAC	60.538	20	100	100	184	381	564	GTAGCTCCGGGATGCCATTT	60.179	20	100	96	GGCAAGCAGTTCCAGGACAA	60.823	20	100
nSSR_175	AAT	5|C6182380:756-1170|+	6|C6050854:243-260|+	5|C5314548:522-536|-	5|C5360592:1025-1039|-	5|C6061109:1178-1192|-	5|C6037172:224-238|+	N/A	N/A	0.37	0.25	0.99	TGCATGAGCGAGCGTAATATCTTGACGGCATTGCTAACTCATCGGTGAGTCATAAAACTCTGGAATTTATGAGAATATGTTTCATGTGTATTAATGAGAAAGCTATCTTACAGTCAATAAAGAGAAGGGAGTAAGTATGCATAATTGGCCCCATTGCTTTATAGAGGTGTATTATAAGACTGAAAATGCATGACCAAAAA	AAAAATAATATAAATAAATAAATAAATGAATTTATTGTGCTTAAGTAAGTGGGTTGGATTAACTCAACATGGCCAAAGGTGCAAGTATGGTTGGGTTAGAAAAATGTAAATAAAAGATGGGGTTTGGATACTTAATGAGGACTGGTATGCAATATAGTTAAGGGCCCATTAGACTAGAATATGACGCAACAATGACCATG	TGCATAATTGGCCCCATTGC	59.531	20	98	92	GCACCTTTGGCCATGTTGAG	60.038	20	100	100	160	337	496	TGCATAATTGGCCCCATTGC	59.531	20	98	92	TTGCACCTTTGGCCATGTTG	59.894	20	100	100	162	337	498	GCATAATTGGCCCCATTGCT	59.239	20	96	100	GCACCTTTGGCCATGTTGAG	60.038	20	100
nSSR_1750	TA	6|C6222818:788-1199|+	N/A	6|C5091839:404-415|+	6|C5250178:415-426|+	N/A	6|C6288586:309-320|-	7|C7099066:732-745|+	7|C5677241:685-698|-	0.47	0.25	1	AAGATTATTTCCAAAAATATAGAAATGTACTCCATTTGTAAGTTTTAACCATTTATTCTGAGTATCAGATAAAATAGTGAACCTATATTGAAGAAATATCTGAAGTAGATTTTAATCATTATTTTTAGAAAAAATCAAGTATACCTAAGAAGAACAGCAAGATTTTGTGTATGTACGAGCGTGTCTAGTGAACAAAGTTT	GCAGTTGAAAGTGTGATAATAATGACAATGAATAGGAATATAGTTGTTATAGAACACATACACTATTGCTATTCAGGAAGGTTGGGGGGCATTAAGTTGATTCATAAAAGCCACCAAAAATTCAAATCGACATTCTATGAAATGCCATCACCAAGTATTAATATGGATTTTATAACATTTGACAGATAGGAAAGAAAGAC	ACGAGCGTGTCTAGTGAACA	59.051	20	99	100	CCCCAACCTTCCTGAATAGCA	59.715	21	100	100	125	374	498	ACGAGCGTGTCTAGTGAACAA	59.664	21	99.04	100	CCCCAACCTTCCTGAATAGCA	59.715	21	100	100	125	374	498	ACGAGCGTGTCTAGTGAACA	59.051	20	99	100	CCCCAACCTTCCTGAATAGC	57.941	20	100
nSSR_1753	TA	7|C5871810:118-531|+	8|scaffold22040:801-816|+	7|C5340475:1412-1425|+	N/A	7|C6068877:829-842|+	N/A	N/A	9|C5583417:368-385|-	0.8	0.38	0.99	TGTAGCATGGATTCGACCCCGAGTCTTCCAGATATCAAACCCCTTGCGTAAGGGACCTTGCCACTCAGCCAAGAGGCCTTTGGCAAAAACAACTTTTAAGCTTTATGTGTAGGTTTTCAAGTTGACTCTCTTTCAAAGGAAAAGAAGCTCAATAATGCCTCATTAATCTATTTTGCAAGATCAGATAAAAAAATCTAAAT	ACATATTCTGATTTTGTTGTCACTCACCGCTCCTGCCAGTAGTCTTGGTTTATTTAAAAAAAATAATCATATTTTGTTAATAATTAAGTGTTATATAGCCGAATTATAACAGAAAAATGTGAGACATTAAAGTGTTGTGCATGCTTCGGCTAGAAGTGCATCCCTCTTAATCAGTTGCTTAGGTGGCACCTGTAGGGGTG	GTAAGGGACCTTGCCACTCA	59.309	20	100	97.5	GGAGCGGTGAGTGACAACAA	60.532	20	100	100	200	164	363	CTTGCCACTCAGCCAAGAGG	60.959	20	98.75	97.5	GGAGCGGTGAGTGACAACAA	60.532	20	100	100	191	173	363	CCTTGCCACTCAGCCAAGAG	60.959	20	98.75	100	GGAGCGGTGAGTGACAACAA	60.532	20	100
nSSR_1754	TA	7|C5872650:80-493|+	7|C5940282:318-331|-	6|C5235851:292-303|-	N/A	N/A	6|C6319268:837-848|+	7|C6805307:237-250|+	N/A	0.49	0.38	0.98	TCTCGCTAGAAACCAAAGATGTGGAGGGCCGAGTCTGGATTTTTCGAGCTAAGTCTTGAATTTGATTCATTCTATTCCAACTTTGTAGGCAATGACTGTATCCATTATCAGTTATTCATTGAACTAGTAAAACTTTTTGGGACACAGACACACACATACACTCGTTTGAAACTTTAAATTATTATATGCACCCACACAAT	CCTTATAAAAATCACATTTTACATTTATAATATTTTCAGAGTTAGATATGATTTTCTCTTGGTTTAATGCAGCTCATGACATTAAGAAGTCGAAGTTTTACCCAAGAATGTGGGAGCAACAATCTTTCTGAATTTGAGGATGAGACTTTGTCAGAGTAGAGCTAATAAAAAGTCGGATGACAATATAATCACTTGCCTAT	TTGGGACACAGACACACACA	59.384	20	100	100	TGTTGCTCCCACATTCTTGG	58.38	20	95	100	199	215	413	TGGGACACAGACACACACAT	59.163	20	100	100	TGTTGCTCCCACATTCTTGG	58.38	20	95	100	198	216	413	TTGGGACACAGACACACACA	59.384	20	100	100	TTGTTGCTCCCACATTCTTGG	59.037	21	95.2
nSSR_1757	TA	7|C5925675:172-585|+	N/A	6|scaffold5660:819-830|-	6|C5145689:200-211|-	6|C5808243:259-270|-	6|C6401282:2720-2731|+	N/A	N/A	0.4	0.38	1	TTATGCATGTATACCCTTATATATCTCCTCAAATAGATAAGAAAACTTGAAAACAGGTACTGCATGGATAAGAAAATTAATTTTAAATTATATAAATTTTGTTTTTGGAAGAGTTTTTAAGATGTGTGGCTTTGAATCTCCATTTTGAACTTTATAAAATTTGAAAACCAAATCCTACTTATTGTAAATATATCTCAAGT	ATATTCGATGTTTGAAAGGCAACCTTTGTCTGTCTTTGTGCAACAATAATAATGACTTGATGGTACAAAGCTGTGAAACTTGAGTATGTTAATACCATGAGTGAACTTTTCTTGTGTTTGAAGCATGAATGGATCGTTTACATACTAATCCCTGAAGTTGTTTGTAATTGCATTTGTAGTTTTTGTTTTAGCTTATTTTA	TGTGTGGCTTTGAATCTCCA	57.345	20	100	100	ACAAAGACAGACAAAGGTTGCC	59.573	22	100	100	131	293	423	TGTGTGGCTTTGAATCTCCA	57.345	20	100	100	AGGTTGCCTTTCAAACATCGA	58.418	21	100	100	117	293	409	TGTGTGGCTTTGAATCTCCA	57.345	20	100	100	CAAAGACAGACAAAGGTTGCCT	59.31	22	100
nSSR_176	AAT	5|C6189700:997-1411|+	5|C6236379:386-400|+	N/A	N/A	6|C6088125:1836-1853|+	6|C6326014:745-762|-	N/A	5|C5481541:347-361|-	0.49	0.38	0.98	GGATGGTCCGTCCAACCCATGGACGAAGCCATCTATGCAGAATGAAATGGACGGGATCCATATCAAAGACCGTGGACACAAACAGGAACTAGTACTTTGACAAGCTAGACAACATGCCAAGCAATATCTATGATCTTGTTTTGAAACCTAGGAACCTCATTTGAATTTTAGCTGCTGCAGCTCTGTAATTTACCAAAAAA	ATAGCTGAGAAGCCAAAGCCTTTCATAATTGAATCTTTGAGGCCGCCTTTTTCCCTCATTCCCGGAATGGAAACCAATGGAGATATGATCCAAAGCCATTTGCTGGAGTGCCTCAGTCCTAGTTAATGGCAGCTGGACCTCCCATTATTCATTAATAAAGAGTGGTTTTGCAAATCTTAGGCTTGCCTTATAATAGTTAC	AGACCGTGGACACAAACAGG	60.179	20	98.75	100	AGGCGGCCTCAAAGATTCAA	59.962	20	100	100	197	266	462	AGACCGTGGACACAAACAGG	60.179	20	98.75	100	AAGGCGGCCTCAAAGATTCA	59.962	20	100	100	198	266	463	GACCGTGGACACAAACAGGA	60.179	20	100	95	AGGCGGCCTCAAAGATTCAA	59.962	20	100
nSSR_1760	TA	7|C5974880:73-486|+	7|C6103439:588-601|+	N/A	7|C5001726:241-254|-	N/A	7|C6377706:848-861|-	5|C7139602:1708-1717|+	N/A	0.8	0.38	0.99	TAAATATCTATAAAAATGATTCAATGAAATACTCATAGTCATGATATACATACTTTGTGTAGATCTTGAATGAAAATGTCACATGCCGCGGCGATCTCTTTCATTAGTCCTGTGACTCAGGTGGGAACTTCCAAAAAATGATTGTTGCATATCAGTAGCAGAAAATCCCTGAAAGTGAAAACATGCAGGAATTTTTTCTT	AAACTCATGGGCCAAACTACGAAATTACCTGTAACATGAATAATGTTTAATGGATATAAAATGTCAAGGTACCAACCTGATTTAACTGAGCAGTACCATGGACTGATTGTTGATGCAGATCAGAAACAGGAGATTCCTGCAGTGCATTACACTTATCCATATTAACTTCAACAAAACATCTGCCAAGTCATGAACTTTCT	CTGTGACTCAGGTGGGAACT	58.948	20	100	100	TCGTAGTTTGGCCCATGAGT	59.019	20	100	92.5	127	181	307	GACTCAGGTGGGAACTTCCA	58.943	20	100	100	TCGTAGTTTGGCCCATGAGT	59.019	20	100	92.5	123	185	307	TGACTCAGGTGGGAACTTCC	58.943	20	100	100	TCGTAGTTTGGCCCATGAGT	59.019	20	100
nSSR_1761	TA	7|C5980048:166-579|+	6|C6135699:695-706|+	4|C5016177:235-242|+	N/A	6|C5997157:277-288|-	N/A	6|C7104988:943-954|+	N/A	0.98	0.38	0.99	GGCCAAAACCTAAGCGAGGATTTTATCAAGAAGGTGGACAAGGTTAAGCAACAGCTAATGCAAATGCTTAAAGCCCCGTTTGGTTTGGCTATAATTGAGCAGGTAGCAGCCTGTGTTTATTTAGCTCTGAGACTTGGCTGTTTCTTTTTTGTCTTCCTTAATTCCAAGCTATCATAATTAACTTCACTTAATTTCCATCT	AACCTCACCCCACTACTTAGAATATATAACACATCATGGATCTCTTCTATATAAGTTATCTTCATAATTCCTTTTAAAAAAACTCCTTTGATCTCCATGGATATCATGAGTTCTTTGGTTAAGATGAATTCCTAGTGATGTTTGTCCTGGTTGTCGTTTACTGGGTTTACTCGGGCCTGTATGAGATACTTGGTTATTTA	TGCTTAAAGCCCCGTTTGGT	60.468	20	100	100	TCTAAGTAGTGGGGTGAGGT	56.685	20	100	100	171	229	399	GCTTAAAGCCCCGTTTGGTT	59.323	20	100	100	TCTAAGTAGTGGGGTGAGGT	56.685	20	100	100	170	230	399	TGCTTAAAGCCCCGTTTGGT	60.468	20	100	100	TTCTAAGTAGTGGGGTGAGGT	57.445	21	100
nSSR_1769	TA	7|C6071482:464-877|+	N/A	6|C5296350:331-342|+	N/A	6|C5980411:525-536|-	6|C6219770:420-431|+	5|C6795875:312-321|-	5|C5320115:193-202|+	0.69	0.25	0.99	GACAACTTCGTAACGGAGAAGATGTCCGAGGATGAAGAGAGGATGAGATACACCAAAGCTTGCACCAAGATGAACACACCAACCTTCATCAAATCATCACTTGATCCATCAAATGCCATTTCAATGCAAATTTGATAAGAAGATGAAAAAGGAGAACAAGAAGAAGTAAGCGAGATGAAGGATTAGTACAAGTGTTCAAG	AGAGAGAAAAAGAGAGAGATTCAAGCTTAAAAGCCGCCTATTTTGAGTCAATGTCACATGTTTGTAAATTGAAATTTCATTGGAAGGCTGCTTAGTTTGGTTATATGAGAGTTTGGTGTCCCACTTTGACTTTTTTAAGAGAGCTGGTTGTCGTATTCGGGTCAAATGCGGTTTCCATGTTGAGAATGTGTGGTTTAAGA	CCAAGATGAACACACCAACCT	58.414	21	100	100	TGACTCAAAATAGGCGGCTT	57.51	20	100	100	200	264	463	CCAAGATGAACACACCAACCT	58.414	21	100	100	TGACTCAAAATAGGCGGCTTT	58.21	21	100	100	200	264	463	AGGAGAACAAGAAGAAGTAAGCGA	59.719	24	100	100	ACCAAACTAAGCAGCCTTCCA	59.855	21	99.04
nSSR_1772	TA	7|C6093690:177-590|+	7|C6237675:761-774|-	7|C5315478:790-803|-	N/A	N/A	6|C6382626:784-795|-	N/A	6|C5753847:1491-1502|-	0.49	0.38	0.99	AAGTATGGGTAGGGGTTTTATAAAAATCACTATTTCTATTTCAAAACTCCCCTCCCAAATGGGTACTAATTGAGGTCTCAAAGACCTCTCATGCTCTTACACCGAGCATTGGGCTAACTACGCTAACTTGAAGGGTGCACACAGGACATATGTCCCCAATGCCCATAATTGGTTATTTCAATTCGTAGTCTTTGTATCTC	TTTTCATGCTTTCGTACATGTCATAGCATTCATTTCAGTGAATAGTTCTATATTCTAACTACTCACAAATACAATTTCACATTCAAGCATTCACAAGCTATTTCAAGTCAAGTAGACAAGTCGTGATCATGCAAGCCCTTACTAGGGACAATCAGCTTGTAAATACTAGAAATAGCACAAGAAACACAATTCAAATTCAC	TGTCCCCAATGCCCATAATTG	58.603	21	100	100	GCTTGCATGATCACGACTTGT	59.534	21	100	100	200	326	525	ACGCTAACTTGAAGGGTGCA	59.892	20	100	100	TGCTATGACATGTACGAAAGCA	58.144	22	98.88	100	123	295	417	ACGCTAACTTGAAGGGTGCA	59.892	20	100	100	GCTTGTGAATGCTTGAATGTGA	58.095	22	100
nSSR_1773	TA	7|C6096272:134-547|+	N/A	6|C5324352:920-931|-	7|C5396732:998-1011|+	7|C6075765:1879-1892|-	6|C6310970:455-466|-	8|C7069030:293-308|-	N/A	0.69	0.25	0.99	TTAGATTTGATCTATAAACCCAGCCCACTTCCTTGGATTAATAGAGAAGCCTATGAATGTGCTTGAATTGAAAATTAGCAGATTGGTGATTAATGGGCTTGACCCACAAGTTAGCCTATGTGAGGGAATCGGTGGGTCGCAACCCATTTCAAAGACATTTAAGTATGGAGGCAGAGGCCAATCCATTAGAGATGGATTTT	TGGACCCGTATGGCTGGCCTTAAACAGTTGGCTCAAGGGAGTTAAAGTTTATTAGTGGACAAAGCCACCCTTGTGAGGTAGAGAGATGCTAGAAGGGTTAACAAATGCTAATGGGCTATCGGCCCAACTAAGACCAAGTGAGGTTGGTGGGCTCTAGAAATTAATGGGCCAACCATCATGCAGAGAGATTATACTTATGA	GCCTATGTGAGGGAATCGGT	59.241	20	99	100	TCACAAGGGTGGCTTTGTCC	60.467	20	99	100	177	246	422	GCCTATGTGAGGGAATCGGT	59.241	20	99	100	CCTCACAAGGGTGGCTTTGT	60.468	20	99	100	179	246	424	ATGTGAGGGAATCGGTGGGT	60.914	20	99	100	TCACAAGGGTGGCTTTGTCC	60.467	20	99
nSSR_1774	TA	7|C6100400:127-540|+	3|C6053836:313-318|-	7|C5341701:763-776|-	N/A	3|C5721523:221-226|-	N/A	5|scaffold24396:1080-1089|+	N/A	1.79	0.38	0.98	ATCTCAATCACATTATAAACTTCTTAGTGTTAAAATTAACACTCTTGCAATAGTTACTTCTTGAAAAAGTAACTTAACTGTGAAAAGGTCAATGACTTAGTTAAGAAGAAAAATAACTAAGTTAAGAAAGTAATTCTTTTAAATTACTTATTTAGTAAGTTTTGAGTTGCTTCACTATAAAGTAAAGCTACTCTAACATC	CAGATCTTGAGTCTCATAAAAATGTAATAAATCAAGAGATTGAAAGTTATCAAACTAAATCAGAAGAATAGAAGTACTTCATTCTCTCTTCCAATTCTCATTTCCTTATTCGTTTCCTTTATCTAGAATACTCCCATATATCATTCCTTCTAATTCAAAATCCCAACACCTAACAAGACTGTTGCTTGTGTTCTTGTTGC	Primers not available
nSSR_1775	TA	7|C6106586:266-679|+	6|C6210015:1070-1081|-	7|C5286176:739-752|+	N/A	7|C6082701:1193-1206|+	7|C6385112:1546-1559|-	N/A	N/A	0.4	0.38	0.99	GGCCTCTGGTGTCCCCATCCACTTCATCAACATCCAGACTGAAGCCCTACTCACCAAGGTACGTAATTATATATTATGATGATATGATATCTAATTAACTAGTTTTGCTTAACTTAATTTGGCACTTCATTTCATTTGATATAATTAATTAATTGATTAGAACCAGGCCGTATTCTTATACCTTAATTAGAAACATATGC	CCTTGGTTCAGAGTTAAAAAGATCCTTCTGTGTTTTTATTATTATTATTTTGGCATAAATGTTAATAATTATTATCTACTCTATTTAACTAGTTTATGAAGAATAAGATGGAATTCAAAGTACTTGTTGTGTTTTGTGGAAATCAATATTGTAGATATCTGGAGAGACAGCTTCAGCTACAGTGAATGCAGGATCACTAT	TGATTAGAACCAGGCCGTAT	56.015	20	100	100	CCACAAAACACAACAAGTAC	53.239	20	100	88.75	200	353	552	ACCAGGCCGTATTCTTATACC	56.956	21	100	97.62	CCACAAAACACAACAAGTAC	53.239	20	100	88.75	192	361	552	AGAACCAGGCCGTATTCTTA	55.943	20	100	100	CCACAAAACACAACAAGTAC	53.239	20	100
nSSR_1777	TA	7|C6108778:346-759|+	N/A	7|C5243557:360-373|+	8|C5153661:292-307|-	N/A	N/A	6|C7014916:577-588|+	6|C5646889:273-284|+	0.75	0.38	0.98	TAGTTCTATTTGCAGAGACAAACGCATTACTCACTGTTCCATCCAAAGATTCACATTTTAATATTGTTTGGAAAAATTCAGAAGTTCTCTCAGCTTCCTGCTCACAAAGGATTTAAATGTGCATCAAGAGATTTTCATGCATTTGATTCTTGGTGGTATGTTTCTCTTATCCTACCTAAAATCTTAAGCTGATAGGATTT	AGTAGATGCTTCTCTAGTTGTTTATATGCTTCTTCTCTAGTTTCTCAACTCTCACATGTCAATCTCTTTCTTTATTTCATTGATACGAAACGACAAATATATGATTGGTCATTTAGTAAAACGAACAAAATAGAGATGTTTACAAATGAAACAAGAGAATCATCGTATACATGAAAATTCAGCCACAACTTACAACAACA	GCTTCCTGCTCACAAAGGAT	58.168	20	N/A	N/A	TGACATGTGAGAGTTGAGAAAC	56.325	22	100	100	183	292	474	GCTTCCTGCTCACAAAGGAT	58.168	20	N/A	N/A	GAGATTGACATGTGAGAGTTGAGA	58.282	24	100	100	188	292	479	GCTTCCTGCTCACAAAGGAT	58.168	20	N/A	N/A	AGAGATTGACATGTGAGAGTTGAG	58.278	24	100
nSSR_1782	TA	7|C6144647:47-460|+	N/A	7|C5299470:930-943|+	7|C5388634:442-455|+	N/A	7|C6388290:1536-1549|-	9|C7141846:3322-3339|+	N/A	0.8	0.38	0.99	GGTGAGGGCACGTTTGCACGAGTGCCGCATTGTCCGCCCCTGACTTTCCTTACGGTGGTGCTTGTCGCCTTTGTCAAAAATAAAAAAGAAAAGGATCTTTGTTTTTATCCCTTTAATATACTAATTATTTTTAAAAAGTTTCCATTCATCTAGGAAGCCAAAATTTCAAAATTTAAGAATACAAAGTCGAGGAATATATG	CAAGATATCTGAAGAGTCATTGCTTGTAGAGGAAGCTTTGGAAAAACCTCAGGTAGTTCCCAATTGTTAGGTCACTCATTTTCATCAAGGAAGCATCATTCAAATTAAAGTGGGACCATAAACAGTCGTCTCCCGAAGTTGCTGAGTAATAAAAGTCAATTTTTTGGACCATTTCAGTGGGATTTTGGAAGAAAGAACCT	GTGCTTGTCGCCTTTGTCAA	59.62	20	100	95	TCCAAAGCTTCCTCTACAAGC	57.941	21	100	100	199	103	301	GTGCTTGTCGCCTTTGTCAA	59.62	20	100	95	TTCCAAAGCTTCCTCTACAAGC	58.588	22	100	100	200	103	302	GTGCTTGTCGCCTTTGTCAA	59.62	20	100	95	CCAAAGCTTCCTCTACAAGC	56.423	20	100
nSSR_179	AAT	5|C6215764:619-1033|+	4|C6165923:733-744|+	5|C5242015:732-746|-	5|C5177187:305-319|-	N/A	4|C6336876:253-264|+	N/A	3|C5739249:216-224|+	0.75	0.25	0.98	GTTTCTTAGCGGTTTGCCGCTCATATTATCAAAAAAAAAAACTTGGATGTATCTCCAAAGGATGAAAGAGAGTAGCAAGGGCAGGGTGACGATGGCCATAAAAAAGCCAACTATATATCAAATGTATCTTTGAATTCCTAATGTAACATCGATGCTTTTTAATTCTAATGAAAGGAGCTTAACCATGTTTATATATAAAA	TATATATCTTCGAAATCCAAAATAAACAAAAAGAAAAAAGAAAACAAGTCTTATTTTTATATCTCATTGTCATGTGCACAAATCAGGACTGTTCTAAGCTGGAATTTTTATTGTAATACTAAACTTGGCCCACTTTAAATCAGGGATTCACACAAAAATTACCTTTCCAAATGCCAAGTTATCAGACAAATAACAACCAT	TGAAAGGAGCTTAACCATGT	54.545	20	100	100	ACAGTCCTGATTTGTGCACA	57.653	20	100	100	139	368	506	TGAAAGGAGCTTAACCATGT	54.545	20	100	100	CCCTGATTTAAAGTGGGCCAAG	59.503	22	99.1	100	192	368	559	TGAAAGGAGCTTAACCATGT	54.545	20	100	100	CCCTGATTTAAAGTGGGCCAA	58.465	21	99.04
nSSR_1795	TA	7|C6170855:9-422|+	N/A	8|C5321494:260-275|+	7|C5283050:576-589|+	N/A	7|scaffold26805:933-946|+	N/A	6|C5686505:342-353|+	0.63	0.38	0.99	AGATAAAAGAATAACTAATGAGAGTGTTGAAGAATATTCTAACTGTGCATGCATGCATGTAAACCCTAAGTTTATACTAAATCCTAATAAGACTCCAACTTAGTTTCCAACACTGATGATGCACATGGAGATCAGAGCTTTTCCTTTGTCTTCTAGTGCATCAACCACAATATCATCTTCTCCTCTTTCTTCCTCCTTGC	TGTACATATATAAACACATGAAATTACATCATCTGATCATCTATCTTGTTAGAGTCTCTAGCTCCATGGCTCAACAGCAGCAGCATCAGCAGATCCTCTCCGGCATGTGGCCATGGTCCGGTCACCGGCCGGAGGACACCGATGACTCCTGGGAAGTGAGAACCTTCAGTACTGAAGATCATACAAAGAGCAGCAACTTA	TGCACATGGAGATCAGAGCT	58.799	20	100	100	GCTGTTGAGCCATGGAGCTA	60.108	20	100	100	173	127	299	TGCACATGGAGATCAGAGCT	58.799	20	100	100	CTGATGCTGCTGCTGTTGAG	59.552	20	100	95	184	127	310	TGCACATGGAGATCAGAGCTT	59.442	21	100	100	GCTGTTGAGCCATGGAGCTA	60.108	20	100
nSSR_1797	TA	7|C6175440:878-1291|+	N/A	7|C5338441:1646-1659|+	9|C5308052:748-765|+	7|C6046823:1236-1249|+	7|C6114348:257-270|-	N/A	N/A	0.8	0.38	0.99	TGATTAAGTTATATATGACTTAACAAACAGAACCGAGAGAAGGTTTTAAAATAAAAAATCTAAATGGGATGGATTGATAGCACTGAGACTGTATGTTATTGTGAATGTATGGACAAAAAGTTATTATATTCATTATGCTTTTCTTTATAAATTTATTTTTATAAGTTTTAGATAATTTTATTTGGGAAAAAAAACTTCAT	GCATTTTTTTTTCATAACAATTTTTTTCTTTTGTTTTATACATGAATAAATAAATACAAACTGTTATGGGGAGAATCTAGCCTTATACGTGCATGGCATGATCCTACAGCCTAGAACCCCACGTCCAGTTATTGACGAGGAACTTCTAGAAAATACGAGAAGAATCATGGTGAGCGATAATGAACCAACGACCTCCATAG	Primers not available
nSSR_1798	TA	7|C6176498:1137-1550|+	N/A	7|C5335781:589-602|+	7|C5292990:308-321|-	9|C6030175:702-719|-	7|C6193192:300-313|+	N/A	N/A	0.8	0.38	1	GATGCAAAGAAGGTTATATGCACAAGTAACACCTTTGTAGAAATAATTTTAGCACCGACTATTGCAGTCAAACGATTGAGCTATTTCGTGAGTAGCTCAAGCTCGGCTCGCTGAGCTAAGCTCGAGCTTGAAATTTCAAGCTGAGCTTGATTGAGTTTAGTTCGAAAGCTTGAAATTATATATACTATTATATTTATATT	ATAATTTATATTTTTTATTTTATAGGAGTATAGAAAAAATCAAGTTGTAAATGAGCTTTTAATTTTGAACCAAGGAAATGAAATCAATTTGATTTTAATTTCTAGCTAAATCGGGTCGAGCTCGAGCTTTTGTAAAATCAAGCCAAGCTTGACCTAACCTATTTGTGCCAAGCTTGAGCTGGGCCCATGTCGATCAAGCT	AGCTGAGCTTGATTGAGTTT	55.259	20	100	100	GAGCTCGACCCGATTTAGCT	59.614	20	100	100	199	338	536	GCTGAGCTTGATTGAGTTTAGT	56.713	22	100	100	GAGCTCGACCCGATTTAGCT	59.614	20	100	100	198	339	536	AGCTGAGCTTGATTGAGTTTAG	56.443	22	100	100	GAGCTCGACCCGATTTAGCT	59.614	20	100
nSSR_18	AAAG	5|C6210312:1637-2056|+	5|C6168209:184-203|+	5|C5314116:483-502|+	5|C5265896:602-621|+	N/A	5|C6382792:1086-1105|+	3|C6768773:188-199|+	N/A	0.75	0.25	0.98	GATCAAAAGGCGTTTCTAAAAGAGGTTTCTAACTACCTGTTAAAATGCGACAGAAAAATGTAAAAATACTATACAAGCTCAAAATCTCAAATCTTCAACATCAGGTATAAGAACCAAGTCTTGAATATGTTCAGAGACAACTAAAAACTTCAAAATTTCACCAACTCCACAACACTACTAATCACTCAGCACAAGTTAAA	AAATGATGCCCACAGACAATATTGAAATTCATCTGTGAGATCCCATATGTTACAAGTTTGAGGATAATCTGAATGAAATCACATAAAGAATACTCTTTAAAGCAACATAAAATTGAGAGTTGGTCTGGATGAAAATGCATACATTTTGGTCTGGATGAAAATGCATACATAACAAAAGCATCATCAAGCACCAAGTCTTA	CACCAACTCCACAACACTACT	57.806	21	96.16	100	GCATTTTCATCCAGACCAACTCT	59.239	23	99.14	100	200	358	557	TCACCAACTCCACAACACTACT	59.23	22	96.4	100	TCATCCAGACCAACTCTCAA	55.781	20	99	100	195	357	551	TCACCAACTCCACAACACTACT	59.23	22	96.4	100	TTCATCCAGACCAACTCTCA	55.781	20	99
nSSR_1803	TA	7|C6185566:266-679|+	7|C6240649:1054-1067|-	7|C5104163:454-467|-	N/A	7|C5938729:230-243|+	7|C6396994:1191-1204|+	N/A	12|C5525839:257-280|-	1.86	0.25	0.99	TGTCACTCATTAACTTCACCTGTCCACATGTCATATATGACATAATCTGGAATAATACAGTTCAGTAGCAGGTCTCAAACATCAATACAGACATGCATTCATGATTGGAATCCTCAAACATGACATGGAATAAGGAAAATATGTTGTAAAAATTGTTCACAAATACACAACATTGAAGAAATAGTAAGAATAGATTATGT	ACTTCTAGCGAGTTTGTTGTTCTTTTAAATTTGTTTTTTCTTCACAATGGGTATTGTAATTGTTGTAAAGCCGGTGAGAAACAAAACAAATAACTAAGCAAATACAGGAAGTATACAAACCCAAAAACTTATCAATACCCATTCTCATCTTCTTGACCAGGTCAGGATCTGATCACAAGATTTTCAACATGATAGTTTGA	TGGAATCCTCAAACATGACATGG	58.982	23	100	98.26	TGTTTTGTTTCTCACCGGCTT	58.904	21	100	100	197	305	501	TGGAATCCTCAAACATGACATGGA	60.264	24	100	97.5	TGTTTTGTTTCTCACCGGCTT	58.904	21	100	100	197	305	501	GGAATCCTCAAACATGACATGGA	58.728	23	100	97.39	TGTTTTGTTTCTCACCGGCTT	58.904	21	100
nSSR_1806	TA	7|C6193152:607-1020|+	7|C6215597:1286-1299|+	7|C5333915:491-504|-	N/A	7|C5954989:749-762|-	7|C6394504:1794-1807|-	N/A	8|C5726249:775-790|+	0.37	0.25	1	CTATTGTAACTTATTCATCCAATGGATATCTTTGTCCAATTATCAGTGCTTTCTTTCAGTTAGAAAGCTGTCTTATCTCATATTTGTCTAATTGCCTTTGACCCAGGCAGCAAGGTAAGAAAGCTAAAAGTCCAGAATCTATTTCTAGAAAAGCAAAGAAAGTCACAGTGCGGAAAAGGTGGGTTCGTATTGCTATTCTT	GGCCTCTCTGTAAAGAAATTGTTCAAAACAATCTCCTATTTCTTCTGGTTCTCCTAGGCCAAGGGAAAAGTCTTGGTCAGGTGGCAAAATTTCCAACAGTAAGCGTCAAAATTACTTCCTAAGGCCTAGGGGAAGGCCCAAAGGTAGATCTCCAAATGTTACTAGTCTGTGTTCTTCAGGCAAACCCAAGGGAAAGCCTG	CCCAGGCAGCAAGGTAAGAA	59.962	20	100	100	CCTTGGCCTAGGAGAACCAG	59.456	20	98	100	177	301	477	CCCAGGCAGCAAGGTAAGAA	59.962	20	100	100	TGCCACCTGACCAAGACTTT	59.449	20	100	100	199	301	499	CCCAGGCAGCAAGGTAAGAA	59.962	20	100	100	TTGCCACCTGACCAAGACTT	59.449	20	100
nSSR_1807	TA	7|C6199668:1284-1697|+	7|C6118335:582-595|-	7|C5198801:225-238|-	6|C5346016:453-464|-	N/A	5|C6138256:264-273|+	6|C7012578:401-412|-	N/A	0.75	0.25	0.98	TCTGCTGCCCAACTCCAACTAAGCCATATGTAGATCACCTAATAGTGTGTGTCTTAATTATAATCAACTAATCAATCATGGACTTTCTCATGCCTTATTAAAAAACACTGTTTACCTGTCTCTCAAAAGGTAACCAATCTTCTAATTGGCTTGATGGTGAATGAAGTAGGTTACAATTAATGGAATGTTGCCTTTTTTTT	ATCTAAATCAATGTATCAAACTATTATAAGTTGTGTTCAAGTTGTATCCTTAATTTGCATAAACCATAGTATTTTTATTAAAAAATAATTGGATTGATTGGACGAATTCAATGATTTATTTCAAATTAAGTTATAAAGTGGATAAATTATATTTTATTTCATTAGATTTGGAATTTGAGCACATGTAACACAACCTGATG	TGGCTTGATGGTGAATGAAGT	57.841	21	100	100	GAATTCGTCCAATCAATCCA	53.67	20	100	100	177	346	522	TGGCTTGATGGTGAATGAAGT	57.841	21	100	100	TGAATTCGTCCAATCAATCC	53.67	20	100	100	178	346	523	TTGGCTTGATGGTGAATGAAGT	58.501	22	100	100	GAATTCGTCCAATCAATCCA	53.67	20	100
nSSR_1817	TA	7|C6215516:965-1378|+	7|C6190903:927-940|+	N/A	7|C5054068:282-295|+	N/A	N/A	4|C7105362:304-311|+	4|C5759789:333-340|+	1.47	0.38	0.98	TAACCACTGAATGATACATGAAAACTCAGTGGATAAAACAAACACAAGTATATTCTTTGATAAATAGATCTCTCAATTCAACAGAACAAAGCACATGGAAAGAACCAAAACTAAAGCCCTTGATTAGTTAGGAACAACAAGAAAACATTCTTATTACCTAGGAGCAATGTAATATACAGAGAATATAGCAAAAAAAACAT	ACAACACAGAAACCGCCCAACTATCATTCCCCACAACTCTCCCGCATTTTTATTTATTCATCAGATAAAAACCACAGAAACTGCCCAAGCATTCATTCCTCACAGCCATTAGAAATAGTTTTAATGTTCATTACATGTTTACCTACATAAACCCAGGTACTTACACCCTTTGGTTGCTTAGATTGTCATAGAACAGAAGC	ACAAAGCACATGGAAAGAACCA	58.97	22	100	100	GTTGGGCGGTTTCTGTGTTG	60.249	20	100	100	150	285	434	ACAAAGCACATGGAAAGAACCA	58.97	22	100	100	CGGGAGAGTTGTGGGGAATG	60.393	20	100	100	173	285	457	ACAAAGCACATGGAAAGAACCA	58.97	22	100	100	AGTTGGGCGGTTTCTGTGTT	60.395	20	100
nSSR_1818	TA	7|C6216084:791-1204|+	7|C6240197:785-798|+	N/A	N/A	8|C5886012:444-459|-	6|C6317728:197-208|+	N/A	6|C5682789:254-265|-	0.75	0.38	0.99	TCTTAATTCAGATGGTTAGTTACAACATAATTGAATCTCTTCTTATTTTTTCCTGCATTATGTATACAATCTTCATGATCAGAACCATTCAACTCTTATTTCTGTAAATGCATTACAAATCTTCTCTGTTCTTCGAACTCTTATTTCTCTATACATCGAATCATTTAATATATAATTAAAAGTTACTTAAAATGTTCTCT	TTAAGATATCACCTTGTATCTTTGTCGTGACGGTAAAGTTGTCTCCATGTGACCTGGAGGTCACGGGTTCGAGTCATGGAAACAACCTCTTGCAAAAATAACAGGGTAAGGCTATATACAATAGACTCAAGTGGTCCGACCCTTCCCCGGACCCCGCACATGCTGGAGCTTTTGTAGCACCGGGTTGCCCTTGTATATTT	TCTTCTCTGTTCTTCGAACTCT	56.542	22	100	100	CATGACTCGAACCCGTGACC	60.736	20	98.75	100	173	319	491	TCTTCTCTGTTCTTCGAACTCT	56.542	22	100	100	CCATGACTCGAACCCGTGAC	60.736	20	98.75	100	174	319	492	TCTTCTCTGTTCTTCGAACTCT	56.542	22	100	100	TCCATGACTCGAACCCGTGA	60.896	20	98.75
nSSR_182	AAT	5|C6218530:2765-3179|+	5|C6158347:792-806|+	6|C5330802:1752-1769|+	N/A	N/A	5|C6348536:534-548|-	N/A	4|C5633057:193-204|+	0.63	0.38	0.99	ACTCAAGACCCTCAAGAGTGCTGAGGGAAGAAGCGAGATCGTTGGCCCAAATATTCCTCCCATCTACAACTCCAGCAAAAAGGTACTTTCCAGAAGGAAACCCACTTTTAATCAGGTCAAGGGTCTGGGTTCCACGCACAAGATCAAAACCAAAACCAGAAATGCCGTTCAAGGAGGTGATAGTCCTAAAGCAGAGTTAA	AAGATTCCACACAGAGAAACATAGAAATTCATGAAACAAGGATAGGAACCAACTTGTATGCCTCTGCAGAGACATCAGCAAAGTAGGTCTCAATCAACACACTCAAACCAGAAAATGATGATTCTAGTTCTGAGTAGGCCTCAGTAAATGCCTGCAATTGGTGAGAATGGAGATCCAGGATAAGGGAGGGCTCATCAAAC	CAGGTCAAGGGTCTGGGTTC	59.963	20	100	98.75	GCAGAGGCATACAAGTTGGT	58.174	20	100	100	170	312	481	ATCAGGTCAAGGGTCTGGGT	60.179	20	100	96.25	GCAGAGGCATACAAGTTGGT	58.174	20	100	100	172	310	481	GTCAAGGGTCTGGGTTCCAC	60.251	20	100	100	GCAGAGGCATACAAGTTGGT	58.174	20	100
nSSR_1831	TA	8|C6029818:17-432|+	N/A	N/A	7|C5281278:389-402|+	N/A	6|C6255230:464-475|-	8|C7100496:352-367|+	10|C5709335:745-764|+	1.33	0.38	0.99	TTAGTACTCTATAAAAAATTTATAGCTTATGAAGGATGAGAATCTTGATGATGCTGCATCGGCAATCATTGACTAATGGAGTAACAACCATGGAGAAATTAAGTCTTAGAGGTGAAGCCTTATAAACTCTTTTCCCCTTTCTTTTTTGATCTTTTCAAGCATTAAAGCAAGATTAACACTTCATATTCACATGTGCAGGC	TTTTTTCTTGTTTGTATTCTCAGTGATATATATTAACCTTTAATGCCTTACAGTACTGTTGTATTCAGCATCTCAGTGAAGTTTCATCTGCTTCTTAAGGGTTTGGAGCTACTCAGACTGTATCTCTTCTAAATTATATATTTCTTATTGTTATTAGTTTACATTTTTAAGAAACCAGAAGAAAGTGTAACCTTCTCTTC	TCATATTCACATGTGCAGGCT	57.714	21	100	95.24	GTCTGAGTAGCTCCAAACCCT	59.097	21	100	98.81	154	196	349	TCATATTCACATGTGCAGGCT	57.714	21	100	95.24	AGTCTGAGTAGCTCCAAACCC	59.097	21	100	97.62	155	196	350	TCATATTCACATGTGCAGGCT	57.714	21	100	95.24	AGCTCCAAACCCTTAAGAAGCA	59.892	22	100
nSSR_1837	TA	8|C6099444:278-693|+	8|C6189107:783-798|+	N/A	N/A	11|C5775175:214-235|+	N/A	7|C7073508:444-457|-	7|C5710559:571-584|+	1.47	0.38	0.99	TATCTACCTTTTGGCCAAGATACATTTTCAAAAACACTGTTCTTCTCATTTGACTTAATTCCTCCATCCTAAACATACAATGTATCTGTTGATCATGCATGACTCTAATTACTTCTCTTCAACGACATTGAAAACAGTGGTTTGTTATAATAACTTGTTAATCAAATTAAATATGGATAGATTGAACACAAGTTCTTATG	AAATTAGAAGTTAAGATAAAGAGAGGCATAATATTGCATGTGAAATCTGAAGAGGTTCCTCTGGCTAAAATGGGTTGACAGACTGGCTAGAATGGTGCAAAACAAGTACCTGGAGACCTAGAAACAGCACGTTTGATGAAGTGATTGTGTTGTTGTGGAAAAGATGAAGAGATAGTGACCACACATTGCCTTATGTTCTG	CAACGACATTGAAAACAGTGGT	57.972	22	100	100	AGCCAGTCTGTCAACCCATT	59.226	20	100	100	185	319	503	ACGACATTGAAAACAGTGGT	55.807	20	100	100	AGCCAGTCTGTCAACCCATT	59.226	20	100	100	183	321	503	CAACGACATTGAAAACAGTGGT	57.972	22	100	100	CTAGCCAGTCTGTCAACCCA	59.023	20	100
nSSR_1839	TA	8|C6103794:243-658|+	7|C6230181:310-323|+	N/A	6|C5381822:1445-1456|-	6|C5860338:399-410|+	N/A	N/A	5|C5493241:243-252|+	1.02	0.38	0.99	GACTGTTTTGTAACTCTCCGCCGTCAAAATAAATAAAATGTCGTCCATCCATTTATTTTTTTAAAAAAAATACTGAATTGAAAGAAACAATGCATTCCATTCAGATATAAGCAATTTTTTCAAACTTCAAACTAGTACAATGTCATCATAAACAACAACACAGCATTTTATGAACATTAAGTGAGAGTGAACACCTCTTT	TCTCTCTCTTCAAAGCCATGGAGAGTTATAGAGAGGAGTGACCACAGACTTGACTTGCAGATACTTATCAAGACCATTCAATCCAGAGTCCCTCCCAAATCCACTCGACTTATAACCACCAAAAGGAGCATCAGGATCAAAAGCAAAGTAGCAATTGATCCAAATAGACCCTGCTCTCACTGATCTTGATACTCTGTTGG	AGTGAGAGTGAACACCTCTT	55.724	20	98.75	100	TCGAGTGGATTTGGGAGGGA	60.253	20	100	97.5	145	379	523	AAGTGAGAGTGAACACCTCT	55.724	20	98.67	96.25	TCGAGTGGATTTGGGAGGGA	60.253	20	100	97.5	146	378	523	AGTGAGAGTGAACACCTCTTT	56.517	21	98.8	100	TCGAGTGGATTTGGGAGGGA	60.253	20	100
nSSR_1844	TA	8|C6130901:694-1109|+	N/A	7|C5006811:288-301|+	N/A	N/A	5|C6366272:270-279|-	5|C7016624:647-656|+	5|C5559077:435-444|+	1.26	0.38	0.99	ATTGATGAGCTGCTGAGTGATGATGAAGAATTCAAATAGGATTCAATTCTATATGCTTGAAATAAAAGTAGAAACCGCCTTCTACTCAGAGAAGAAGATTTCTTGTAGCAAGCATCTTCAAGAGTTAGTTCTCTCTCTATACCAGCTTATACAAAATACTGTAATCATGGCAACGCTAGAGATGTTGATAAAAATAAAAT	AAAGGTTTTTGGAAGAGTTGATTTCTATGCAATGCAAAGTAATGAATAGAAAATGCTGTGAATTTTCTGAATTTTGTAAAAGATTATGGAACACAACCTTTTTGCTATATATCATGGAAACAGGCAGAAGTATTTTCTTGGATCTGGGTTATGATCGCTACTAAGGTGCCTATAAAAATCAAAATAAATTTAGTTCTTTC	TGGCAACGCTAGAGATGTTGA	59.725	21	100	100	ACTTCTGCCTGTTTCCATGA	57.043	20	100	100	180	367	546	TCATGGCAACGCTAGAGATGT	59.518	21	100	100	ACTTCTGCCTGTTTCCATGA	57.043	20	100	100	183	364	546	TGGCAACGCTAGAGATGTTG	58.274	20	100	100	ACTTCTGCCTGTTTCCATGA	57.043	20	100
nSSR_1848	TA	8|C6141289:172-587|+	7|C5967028:415-428|+	8|C5306718:377-392|-	6|C5382782:1244-1255|+	N/A	6|C6319142:293-304|-	N/A	N/A	0.89	0.38	0.98	ATTCGGCGACGAATGAGGTTCTTCAAGAGATGTTGAGAGTTGGAGCTGCGTCTAAGCTTTGTTTTCTTCTCCAAGCCAATTGTTCAAGCTTTGTGAGAGAAAGGACAAGGTGGATTCTAAAGATGCACTCTGGTGCATGGAAGAACTCTCCTTGCATCAGTGTTTATTTGTTATCATGCTATCCTTAATTGATTTAACAT	ACATGAATTAATTGTTCATATATAACTTTGTATATTGAGAGATGATCATTCTTTGTAATTGATTACTAGACAAGTAGCTAGTGTTGTGATTGACCCGCTCCCTTTGTCGAGGCTATCACTGGCAACACACAGTGCGGAATATAGAAGGCAATCTTAGAAACCAAAATATCCAAGAACACTCAAGAACAAATCATGCAATG	TGGTGCATGGAAGAACTCTCC	59.996	21	100	100	AGCGGGTCAATCACAACACT	59.891	20	100	90	185	301	485	TGGTGCATGGAAGAACTCTCC	59.996	21	100	100	CAAAGGGAGCGGGTCAATCA	60.322	20	95	100	192	301	492	TGGTGCATGGAAGAACTCTCC	59.996	21	100	100	AAAGGGAGCGGGTCAATCAC	60.323	20	100
nSSR_1849	TA	8|C6142993:160-575|+	N/A	8|C5290146:868-883|+	7|C5308238:625-638|-	7|C6068523:1118-1131|+	7|C6374710:664-677|+	6|C7109652:380-391|-	N/A	0.69	0.25	1	CAGTGGGATGACAGGGAGATTATCACAGTTGCAAATCTCAATCATAAGGCCATCCGGATCATGGAAGAACAGCTGCTCCACATAAACTCCATCATCCTCCACCTGCCTCTGGATGTAGCTTATGCCCATCTCCTTCAGCTTTCTCTCCACCATACTCATGCTCTCACACTATTTACATATAGAATAGTAATAAGTGGATG	AGGTGGTGGCCGGTGGTGGTTCATGCATGCACGTACCTGGAAAGAAATATGATTGTCCTTGGGATTGATCTCTGTTTTCTTAGGTAGGCTGGCAGGGTCCTCTGCTTGCAGGAGATGAATACCAATCCCATAGTCACTGAACAGCCTATGTATATACAACAAGGTGAGGTAGTGGCAATAATTTATGAAAGATTGCATAT	ATCATCCTCCACCTGCCTCT	60.03	20	100	98	TTCCAGGTACGTGCATGCAT	60.036	20	99	100	168	249	416	TCCACCTGCCTCTGGATGTA	59.957	20	100	100	TTCCAGGTACGTGCATGCAT	60.036	20	99	100	161	256	416	ATCATCCTCCACCTGCCTCT	60.03	20	100	98	GGTACGTGCATGCATGAACC	59.901	20	99
nSSR_185	AAT	6|C5798712:7-424|+	6|C6103419:553-570|-	N/A	6|C5388098:787-804|-	6|C6082263:1605-1622|-	6|C6375466:859-876|+	N/A	5|C5667903:720-734|-	0.37	0.25	0.99	TTAAAAAAGAGCAGATAGGCAGAAGACTTGAAATTCTTTTAAAATTTGAAAAACGTGAACTTCACGTGGTGATTGCTGAAAGTATCATGAGAACACGGGAAGTCCGAACTTCACCTTTTGGTTTACGAACACAGCAATTTAAAGTTGAAATCCACAAAATAGTGCTATTGTGATACCGCAAAATAGAATTTTGATCACAA	CAACAAGAAGTACCAAATGGGAATGGATCTTTATCTTGATACAATCATAGAAATCTGCATTTGTAACTGATTGGTTGATGAAGATTGAATTATTTACCTTTCCTCCAACAAAAACAACTGCAATGTCTACCGTTTGCTGATGATTCTCCATAGAGCACTGGAAAATAAATAAGAATACATCATTACAACTTGAACCATGT	AGTGCTATTGTGATACCGCAA	57.74	21	100	100	GCAAACGGTAGACATTGCAGT	59.465	21	95.2	100	195	166	360	AGTGCTATTGTGATACCGCAA	57.74	21	100	100	TCAGCAAACGGTAGACATTGC	59.196	21	95.2	100	198	166	363	AGTGCTATTGTGATACCGCAAA	58.394	22	100	100	GCAAACGGTAGACATTGCAGT	59.465	21	95.2
nSSR_1853	TA	8|C6166783:759-1174|+	N/A	7|C5202067:284-297|+	10|C5358634:793-812|+	8|C6035339:932-947|-	N/A	6|C6983512:268-279|+	N/A	1.33	0.38	0.99	AATTAATCAACAGAATCTCCACGGCACGTTGAAGGACGACGTCCTTCTCCACTCCCTCAATCATGGAGAATATATTGATCGATCGTGTGAAACTCTCTCTATATCTCTCACAAAAACTCTCTATATAAACCTCACACATTATGCTACTACTTGGAACACAGCAGTACCAATAATATATACAACTTATAAAAGTTATAAGT	GTTAAGCAGTAGTATATATCATGGCTGCGAAGACAATATTCCTGCTAGCTTTGTTCATCTTGGGTTTCATGCAGGCTACTCATGTTGTTTCAAGAACTCTCAACAGGGACATGGCCATGAAGGAAAGCCATGAGCAGTGGATGGCTAATTATGGGAGAGTGTACAAAGATGCAGCTGAGAAGCAGCATCGTCTGGAGATC	ACTTGGAACACAGCAGTACCA	59.511	21	100	96.43	ATGGCCATGTCCCTGTTGAG	60.034	20	98.75	100	186	348	533	ACTTGGAACACAGCAGTACCA	59.511	21	100	96.43	CTTCATGGCCATGTCCCTGT	60.034	20	100	100	190	348	537	ACTTGGAACACAGCAGTACCA	59.511	21	100	96.43	TGGCTTTCCTTCATGGCCAT	59.958	20	100
nSSR_1859	TA	8|C6183880:721-1136|+	9|C6173185:685-702|-	10|C5260470:810-829|+	8|C5251510:203-218|+	N/A	N/A	9|C7059028:569-586|-	N/A	0.75	0.38	1	TCGTAACTTACTTGAAGGGAATGCATGGATGACTCTAACTGGAGTTTTGTGGCGTGAGTATGGGTATACTTAATGTATTAGTAGAGTCTTGATTATCTGGTGTTGTTGAACTAATCAGGTGGTTGTTATAGGCTTGGTGACTAGGATGAACCCGGGTGTTTATGGACTTTAGTTGGGTCACGGTTGAAAACCTGAGGCCT	GGGTTGGGATTGAGAGGGGCACATATCGCTCTAGCAATCAACCACGCGGCTACATCACAGCAAACATCCTAGGGCCCTTACAACCCAACTCAAGACCAAATAGATGAGCTACTCGGAAAACAGTCACCCAAGTACCGTGGTCCTAATCTACTCGGCCTCTACCCTCCTAAAGAGCCGCTCCGCGGAACACAAAGGTTCCC	ACTAGGATGAACCCGGGTGT	60.253	20	100	100	AAGGGCCCTAGGATGTTTGC	60.033	20	100	100	156	339	494	ACTAGGATGAACCCGGGTGT	60.253	20	100	100	GGCCCTAGGATGTTTGCTGT	60.034	20	100	100	153	339	491	ACTAGGATGAACCCGGGTGT	60.253	20	100	100	GAGCGATATGTGCCCCTCTC	60.038	20	100
nSSR_1861	TA	8|C6188372:1023-1438|+	N/A	8|C5236873:309-324|-	N/A	11|C6074861:920-941|-	10|C6129650:354-373|-	8|C7109128:805-820|+	N/A	1.26	0.38	0.97	TGTCATTCATATTATGGTACTGAAAAGCAAAATTTAATTCAAAAATGTGTGAATCATAAGGGTAGTCTTTAAATGGTCAATTAATGAGCACCAGAGACTCAAACAACTTGATTAATGGTCCATAAGTTATCCCTATGTAACTCTTCCTAAAATAGTCCATCTTCCAAGTGGTTTTGACTTGTCATTCATGATATTTCATC	AGAAATCTTCAAGTATATATTATTGTATAATCCTTAGGTTGGAACAACTGATATTGCAGTGAAATTCTCATACAATTTGATGGCTCTTGGTAGTGTAATTAATTAAGCAATTAGAAGACATCTCAAAGAATTTATGAGGTTTGAGCAACCTCAAATTTACCTTCTAAAATAAGTAACAATGAATAATTAGTATCAAGAAA	TGAGCACCAGAGACTCAAACA	59.238	21	98.8	100	ACTGCAATATCAGTTGTTCCAACC	59.782	24	100	98.96	192	284	475	TGAGCACCAGAGACTCAAACA	59.238	21	98.8	100	CTGCAATATCAGTTGTTCCAACCT	59.54	24	100	95.83	191	284	474	TGAGCACCAGAGACTCAAACA	59.238	21	98.8	100	TCAGTTGTTCCAACCTAAGGA	56.491	21	97.5
nSSR_1863	TA	8|C6192216:1167-1582|+	8|C5962932:353-368|-	9|C5286730:938-955|+	8|C5208948:184-199|-	N/A	N/A	7|C7125442:549-562|-	8|C5742385:880-895|-	0.58	0.25	0.99	CTGATTGAGCCTTTCTTGCATTTTGATGCAGCTGTCATCTGGATGAGAATGCTTCGCAATGTTTCACAAGGGAAGGGAGAAGATATCTTTGCTTTTGCAGCGGACCTTAGGAAACGGTCTAGATGGGTATCAAGCTCATACAAGTATCTGCAGATGGTGTTAGGGAATTGTATAAAATTCCAAAACAATTGAAATATATC	GCTGGTGTGTGGGTGTGTATTTGTGTGTGGATGTGTTCATTAGTTCAATGAAAGATACATAGCTATGAAAATTCAGCTCTATATTTTAATTGATTTCCTAGACTTATGTAATTGTATAATGCAAGCATCAGCATTCCTAAATGACACCATGCTTCATCTAAACGAGCTTACAATAATATTGTGTGCTCAAATATTTTTAT	GCTTTTGCAGCGGACCTTAG	59.831	20	100	100	CACAAATACACACCCACACACC	59.966	22	100	100	151	290	440	GCTTTTGCAGCGGACCTTAG	59.831	20	100	100	TCCACACACAAATACACACCCA	60.092	22	100	100	157	290	446	TGCAGCGGACCTTAGGAAAC	60.321	20	100	100	CACAAATACACACCCACACACC	59.966	22	100
nSSR_187	AAT	6|C6068260:76-493|+	6|C6004178:204-221|+	5|C5339405:1834-1848|-	N/A	6|C6019031:848-865|-	N/A	N/A	5|C5385947:255-269|+	0.49	0.38	1	TATTAAAGTCTTGCGGGTTTATTAGACCCGAAATTAAAATATTTTCATTAAATCTATTAAAAATATATGAATAGTCGGTCAAAAAGATGTTTCCTTACCGATAGGAGGGTCTCGTGGCAACCTGAAGTTTGGTGGAGAAGCATCATCAATTCTTGGATCTGTTTTATGTTCCAAGTTTCAAATTCAAATTCAAATTCAAA	AACACAAATCCATTACAAAAAGATGAGAAAACATAAAATTAAACATAAGCAAACTTCCCTCCGATGTTTTTCCCCACTATTGATGGTGTATTGGATCTGAAATCTCTTCTCCCTTCAGGCCCTCGCTATCTCCCAAGATCGCTTCCTTCAAACCCTAGCCGTCGGTGAACTCCAAGATCTCCAAGTTGGCCAAAGAGGTG	CGTGGCAACCTGAAGTTTGG	59.969	20	100	100	ACATCGGAGGGAAGTTTGCT	59.307	20	100	97.5	173	187	359	GTCTCGTGGCAACCTGAAGT	60.25	20	100	100	ACATCGGAGGGAAGTTTGCT	59.307	20	100	97.5	177	183	359	ATAGGAGGGTCTCGTGGCAA	60.325	20	100	100	ACATCGGAGGGAAGTTTGCT	59.307	20	100
nSSR_1870	TA	8|C6202882:478-893|+	N/A	7|C5243253:669-682|-	12|C5024224:241-264|-	N/A	8|C6321334:791-806|-	7|C7013510:647-660|+	N/A	1.85	0.38	0.99	ACAGGTTCTTTGAAGTTTTTGTTTTCTTCATTATAGCTACTTAATAGCAAGAAGCTTCTCTCTTCTTATATATCTAGAGAGGATTTGTAGGAAATGGTGATGGGAGATATGATCTATTAATTGGAGGACACAGCCTAGCCTCTCAGTCAAGTTGAGAGCCTTTTTGGAGGTTTTTAGAGATAAAAGGAGAAGAGTTCACT	CACACACACTCAAAATTTTCATATTTTATACTTGCATATCTATTAATTATTTTACTGAATTTAAAAAATAAATCAGAGTAGCCATTTTTTGGTTCAATGTAAAACTCTATAATCTTGACAATGATTTGGAAAACTGAGATTAAGCTGTAGAGAACTTTATTATTGCATTTTATTTTCTCCTATTTCTCTTCCTTTCTTTT	Primers not available
nSSR_1874	TA	8|C6209514:1420-1835|+	N/A	8|C5267338:557-572|-	8|C5158303:331-346|+	N/A	N/A	7|C7126098:1033-1046|+	7|C5752491:751-764|-	0.49	0.38	1	GTCAATCATCTAACTTTCCTGTCAAAACTAGAACTTTGATCCCATTAGCTGACCACCTTTCAAATGATAATGCCTCGTGTTACTGACCAACTACATGAGATGGAAGTTATAAACTCGACAGGAAGAGGATGACACTGCATGACAAAGGACAAGGATTTTGGACACTGTAGTTCTATAATTAAGATAAGGCAGCATGGAGG	CACACTTAAACTAATATTTATAAATCCAATGTTTGAAGATTAAACTCCAACCTGAATGAGGAAAATCACATGAAAGAGTTACAATAGCATCATTTAAAGAATAAAGATATGCTTTCTTGTAAAGCTTGTTTATTACAACCTACACCTCATAAGGAAAAGAAATTGGGTCATTAATAATTCAAAAGGACATGCTTAATGTT	CAGGAAGAGGATGACACTGCA	59.723	21	100	100	TCCTCATTCAGGTTGGAGTT	56.049	20	100	100	160	318	477	CAGGAAGAGGATGACACTGCA	59.723	21	100	100	TTCCTCATTCAGGTTGGAGT	56.049	20	100	100	161	318	478	ACAGGAAGAGGATGACACTGC	59.722	21	100	100	TCCTCATTCAGGTTGGAGTT	56.049	20	100
nSSR_1881	TA	8|C6216208:1852-2267|+	7|C6113761:293-306|+	8|C5317956:1247-1262|+	7|C5390414:1660-1673|+	N/A	N/A	N/A	10|C5740339:242-261|-	1.1	0.38	0.99	TTAAATTACAATAGCGTCAGACATGAGCAACCTAAAAAGACAAGTGAAGTTGAGAAAGTCATAACTTGTGCTATGAAACCAAAAACACCAGAACAAAATTACTAATCTAGTTGGTTTCCACGGTCCTTCTCAAAAATAAGAGGTTGAGGGTTGAGGGTTCGAACCATGCATGAACCATGGCAACTTGGCTTGTCCACATT	AAAAATTACTAATCTAAAAAAACATGAAGGGGAGCCTAGGCACAACAGTAAATTTGTCGCTATATGGTCTGGAGGTCACTGGTTCGAGTCATGGAAACATTCTCTTCTAGAGGAAAAACAAACAGAGTACGACAATAAACCCAAGTGGTCTAACCCTTCCCCGGATCCCGCACACAGCGGGAGCTTTGTAGCACCGTGCT	CATGGCAACTTGGCTTGTCC	60.038	20	100	100	CGAACCAGTGACCTCCAGAC	60.038	20	98.75	97.5	127	375	501	AGAGGTTGAGGGTTGAGGGT	60.104	20	100	100	CGAACCAGTGACCTCCAGAC	60.038	20	98.75	97.5	164	338	501	CATGGCAACTTGGCTTGTCC	60.038	20	100	100	ACCAGTGACCTCCAGACCAT	60.179	20	98.75
nSSR_1885	TA	9|C6036850:132-549|+	8|C6230565:1001-1016|-	7|C5115731:242-255|+	8|C5390938:1323-1338|-	N/A	7|C6201876:368-381|+	7|C7120754:809-822|+	N/A	0.75	0.25	1	TTTTATTTTTCAAAATAATTTAAAGATGTTCTCTCCTCACCAATTAATGGCTTTGGTGTTAATGTGCTCCTATGCTTGTAACAGGACCACACTATGATTCAAAAGAGAAGGCTAGACCTATTTGGAAAGGAACCAGATTCAAGGATTGGGCTTCAAGGTTGATCATGCATGCATGTCTTGATAAGTTGGAGTTAAGGAAC	CATTATATACTTTATATATATTTTTTGAAACTAGGCATGCTTGCTGCTCTTGTACGTATCCATTTGTTTTAGAACAAAGAAGGATTAGAAAGAAGAAAAGCAGGGACATGGATTCCTTTTTTGCATTAGCTTTACAAGCTTTTGGGGCATGGCAATGGAGCATGCAAAGCAAGCCTAAGCCAAGCACACGAGGGTTCCCT	GGGCTTCAAGGTTGATCATGC	59.864	21	100	100	AGGAATCCATGTCCCTGCTT	58.697	20	100	100	188	278	465	GGGCTTCAAGGTTGATCATGC	59.864	21	100	100	AAGGAATCCATGTCCCTGCT	58.697	20	100	100	189	278	466	AGGATTGGGCTTCAAGGTTGA	59.571	21	100	100	AGGAATCCATGTCCCTGCTT	58.697	20	100
nSSR_1890	TA	9|C6083434:124-541|+	9|C6241131:1451-1468|+	9|C5149107:371-388|-	N/A	N/A	N/A	4|C7137136:1988-1995|+	4|C5585525:205-212|+	2.45	0.38	0.96	TTAAAAAACAACTTTTTTTCCTCTATTCTAGTCATAAAAAATACAACATGATCTGTCTATTCAAACAATAAATTTCCTAATTTTCTGAATAAACCACTAGACAATTCAAGCATATATAATTCTGAATTTTAATGCTCATTTTATCATACTAACCAATCAAACATACTTCCTATTTATGAATTATTGCTTGAATATGTATG	TGCATACCCAAAGGAGGCCCATGATGGTTTCCTCACTGAGACCATACTTGTCCTGGAGAGTGAGCAAAGCGTCGACAAAGTGCTGCTTGGCGCCGCTCTGGCTGCGCGCGCGGGTGTGCTCGGCCATGATGGCCTTGGTGAGGCGGTCACGGCGCGCATTGTGCTTGGCGATGGCGCCCTCGTCCAAAGGGAACATCCAG	ACCACTAGACAATTCAAGCA	54.582	20	100	100	ATGGGCCTCCTTTGGGTATG	59.442	20	100	100	148	215	362	ACCACTAGACAATTCAAGCA	54.582	20	100	100	CATGGGCCTCCTTTGGGTAT	59.442	20	100	100	149	215	363	ACCACTAGACAATTCAAGCA	54.582	20	100	100	AACCATCATGGGCCTCCTTT	59.288	20	100
nSSR_1899	TA	9|C6175384:1056-1473|+	N/A	9|C5261010:264-281|+	10|C5376430:978-997|+	8|C5896181:435-450|-	8|C6187544:320-335|+	N/A	N/A	0.75	0.38	1	TAGAAATTGAAACAATGACACAAGTATGTCACTTAAAAGTTACCTTTGCATATAAACTAGGACTAGATTTATAATATATTAACTAATACTTTTAAAATTTAAGATTCAGATAAGGAGTCTTTGAATCTCTGTATTCCAAGACAACTAATCTAATAACTTATTAGTTAGAACGTAGAACCTATACAAGATTGGAATGTATG	TGCCTACGCCTAAGCTTTCACCATGAGAGTATAAATAGAGGGGAGAACCTACCTGAGTTTCTAATAAGCAACATGAGATTCCACTTTAATTCCACAAAGGAATAACTCTTGATAAGATCCAGAGAGTTTGTAGATGTGGGATCATGATTGTAATAAACATTGTTGGAAATAATAATTAAATAAACATTATGTGAAAGTAT	GGAGTCTTTGAATCTCTGTATTCC	56.84	24	100	100	TGGTGAAAGCTTAGGCGTAGG	60.066	21	100	100	128	313	440	GGAGTCTTTGAATCTCTGTATTCC	56.84	24	100	100	CTCAGGTAGGTTCTCCCCTCT	59.71	21	100	100	162	313	474	GGAGTCTTTGAATCTCTGTATTCC	56.84	24	100	100	TCAGGTAGGTTCTCCCCTCT	58.605	20	100
nSSR_190	AAT	6|C6140521:702-1119|+	N/A	5|C5287098:408-422|+	N/A	5|C5933079:404-418|+	5|C6384342:507-521|-	N/A	5|scaffold5428:1192-1206|-	0.4	0.38	1	TTGAGTTGGCATTTGACAAAAGAGTTGAAAGCTTGGCAGCCTCACATGGAACAATAGAATTTGATTTATATAGTTTCCAACTTAGACAAAGGCTGAGGTCTTTGCAGACTAAAAAGACTACTATTTCTTTTCTTCTCTTCTCTTCTCCTCTTTCTTATGAAACATATGTACTTGTTATAATATATGCAATTGTTTGATTG	TAAGTAGGTGGGAGTGAAGTCTCCAAGACTCAAATTTCATAGATTGACAAGTCTTTATTTTATCACCCAACAAACATTATGTCTACACCTTGCACCTTCAATGCTTAATTATTCTTGCTTGCATGTTTGATGTTCATCTATGATCTACCACTTTTTTTTCTTCTTTTATATGTAATTTTAAAAAGCTGACTATTTATCTT	AAGGCTGAGGTCTTTGCAGA	59.233	20	100	100	GAGACTTCACTCCCACCTACT	58.19	21	100	100	153	288	440	AAGGCTGAGGTCTTTGCAGA	59.233	20	100	100	AGACTTCACTCCCACCTACT	56.997	20	100	100	152	288	439	AAGGCTGAGGTCTTTGCAGA	59.233	20	100	100	GAGACTTCACTCCCACCTACTT	58.833	22	100
nSSR_1903	TA	9|C6181462:923-1340|+	10|C6174835:489-508|-	N/A	7|C5313458:376-389|-	N/A	7|C6083482:281-294|-	6|C7031060:393-404|+	N/A	1.47	0.38	1	TTTTATGTTGATTTGATGATCTGATGATTCTGAACCGTTGGATCTGGAATTGATGACAGATGATACCCCGGAGGAAAAGAAGGTGAGGCTGAGGCAGTGGGCCCAGGTGGTTGCGTGCTCGGTGCGCCAGTGTCAGCCGTTGAAGAAGAAGACGAGCGGGGATCAGAGTGAAAAGTGAGAACTTATCATATGTTCGGTGT	GAAAGACTATGCTTTGTTTTTCCGATTATGTAGCTTTAGCTAAACCAGAATATCTTTATATGGCTTGTTCTTGTATAATGGACCAATGGTGAATTCAAAGATAACATGACTTAAAGTCAACTTATCATAACTTCATATGGGTGTGATGATAAATAAATTGAGTTTGGATAAATTGTAATTTATTAATACGAGATGAAATT	GAAGAAGACGAGCGGGGATC	60.249	20	100	100	CTTTGAATTCACCATTGGTCCA	57.13	22	100	100	174	344	517	CCAGTGTCAGCCGTTGAAGA	60.25	20	100	100	CTTTGAATTCACCATTGGTCCA	57.13	22	100	100	192	326	517	GAAGAAGACGAGCGGGGATC	60.249	20	100	100	GGTCCATTATACAAGAACAAGCCA	59.053	24	100
nSSR_1904	TA	9|C6182338:938-1355|+	11|C6094605:358-379|+	N/A	9|C5378152:677-694|-	12|C6040965:1215-1238|-	9|C6385094:285-302|+	N/A	N/A	1.26	0.38	0.99	ACACAGCATTGTTGGAATAATGAAGATCGATCAATCAAATTATTAATTAGTTAAACAAACTTAATAAAAATATAAACAACAAATTAACAATAAATAGGCTATTGGCAAAAAGTAGAGTATCGAAATACAATATGTTAATATTATTTTATAGATCAGACAATATATATGAGTGTTTGTTACACAAGTCACAAGTGTACATG	ACGCCCATTCCTGGTCTCTTGCTCTCTCCGCTCGTCGTCTTCTTATCGATCCACCGCGCCGCTACCTTCTAATTAGGAGATCGAGAGAGATGTCGAGCTCTTCTTCGCCTTCTGGTTCGGAAGGCGGGGACGAGGGTATCGGCCCTTCAAGTCCAGCGCCCCGGCGCACCGACGAGCCCTCACCATCCCGACGCCGTTCC	CACAAGTCACAAGTGTACATGT	56.857	22	100	100	ACCAGAAGGCGAAGAAGAGC	60.037	20	100	100	155	379	533	ACACAAGTCACAAGTGTACATG	56.857	22	100	100	ACCAGAAGGCGAAGAAGAGC	60.037	20	100	100	156	378	533	CACAAGTCACAAGTGTACATGT	56.857	22	100	100	AAGGCGAAGAAGAGCTCGAC	60.109	20	100
nSSR_1910	TA	9|C6198772:363-780|+	9|C6196825:869-886|+	8|C5106923:318-333|+	N/A	N/A	8|C6360352:800-815|+	9|C7010988:479-496|+	N/A	0.49	0.38	0.99	TTAATTTACTTCCAATAAATCCTCTAATGTTGCTGCTTAATTCACCTCATTGTTCCTTCTTCATTGTGCCTACAGGCCACATCTTGATCTCTTAAGTCATGGAAGAACTGATCAGCAACTGCAGTTGAGACAAGTCATCAGCTGGTCAGTCAAACTCCCACTTCTCTCATCACCATCCCTCCTCAGATCTCAATTTGAGG	AATATATCACCAGCCTACTCTTTCTACATTCTAATCTCTCATCCAGTAGTAGTACTACATACATCTCTTTTTCAGAAGACAAGTTTTGTAGGTTCTTCATGTTCTTTTGATCATCAGAGGTACAGATTTCACCACAAGAAGTAGAGATGGAGGGTAATAAGTGAGTGAAACCAAAGATATTTCAGCTATTTTCAGGTACA	GCTGGTCAGTCAAACTCCCA	59.891	20	100	85	TGTAGAAAGAGTAGGCTGGTGA	58.225	22	100	100	106	340	445	GCTGGTCAGTCAAACTCCCA	59.891	20	100	85	TGTAGAAAGAGTAGGCTGGTG	56.76	21	100	100	106	340	445	GCTGGTCAGTCAAACTCCCA	59.891	20	100	85	TGTAGAAAGAGTAGGCTGGTGAT	58.646	23	100
nSSR_1915	TA	9|C6216878:755-1172|+	11|C6038456:321-342|-	10|C5025783:351-370|-	N/A	8|C5993213:762-777|+	N/A	8|C7131934:1190-1205|-	8|C5733705:515-530|-	1.15	0.25	0.99	CAATATGTTATAAACCTTCACTCCGATCCTGCCTCTGTTTAGTTGATAAAAAGGACTCAACTAGAGTTTTGGCCTACAGAATGGGCTTTTGTAAAGGAGTTCAAGTAGTTAATTAGGGCTTAGCTCAGGTATAGCTGATGAATCTCGTGGCCCAAAAGGACTAAATTTCTACCATATAAAATTGTGCCTCTGAAGATGTG	TCAAATCCATGTATATGGGCTAGGCTTTGACCTCGTGTAGGCTCAGGTTTTTTATTGGATGATTTCTCTTTCTACCATGTCTTAAATCAAGATGAGATTTGATCATTGAATTAAATTCTGAAGATGGATAATGCATTGCAATCATGTACTTGATGTTCATGTACATGGTAGTATGTTGAAAAAAATAATGCAATTGGTCG	AATCTCGTGGCCCAAAAGGA	59.596	20	100	100	ACACGAGGTCAAAGCCTAGC	60.037	20	100	100	116	340	455	TGATGAATCTCGTGGCCCAA	59.382	20	100	100	ACACGAGGTCAAAGCCTAGC	60.037	20	100	100	121	335	455	GAATCTCGTGGCCCAAAAGG	59.189	20	100	100	ACACGAGGTCAAAGCCTAGC	60.037	20	100
nSSR_192	AAT	6|C6166731:223-640|+	N/A	5|C5267086:901-915|-	4|C5367030:262-273|+	5|C6070691:1320-1334|+	N/A	5|C6732889:259-273|-	N/A	0.63	0.38	0.98	GTAAGGTATATATATCTAGGTTCAAGTGGAATAGTATTGTTTAGTTTGCCAACTATTCATTAATGGCACCCGGACCTATATGCTAGCCAATCTTTATAAGAAAAGTTGATAATTCATTTTTTCTCATAAAAAGAGCTTGAGGGATCGAACCACATTTATGAGATGAGATGCTTCTAGTAAAATATTCATAATTCTTAAAA	AAAAAAATTTGCAAGATAGTACTTGAACTGGTCTATCAAGCATAAGCTTATTGTTTAGCCAAAAGCTATTAGTTATTGACTTTTGGGTGTTGGCCAATTCTTATTTTTATTTATTTTAAATTTTTTAACAGGTGATTGATAGCTAATTAATATCGTGATAAATGAATTAATAACTTAACCATCTAAATATTAAACACCGT	GCTTGAGGGATCGAACCACA	60.036	20	N/A	N/A	TGGCCAACACCCAAAAGTCA	60.325	20	100	100	180	334	513	AGCTTGAGGGATCGAACCAC	59.749	20	N/A	N/A	TGGCCAACACCCAAAAGTCA	60.325	20	100	100	181	333	513	GAGCTTGAGGGATCGAACCA	59.463	20	95	100	TGGCCAACACCCAAAAGTCA	60.325	20	100
nSSR_1926	TAAA	5|C5990936:125-544|+	5|C5895792:306-325|-	4|C5341545:2558-2573|+	N/A	5|C6079521:505-524|-	6|C6375146:278-301|-	N/A	N/A	0.63	0.38	1	CAATGGTTTATCCCTCACGGCCACACAACAATTAGCCCCCATGATTGTTCAAACACCAAAAGGCAAACCCCCTCACAACAGAAAAGCAACTCACAGATGGTATTTGAAATCAAGAAGCATATATTTTATTTAAATTCATCACCCTGATGCTCTAATATTGCATCAAACTAACGATCACCAGCTGCTCCTGTACAATACAT	TGTTAAATACATGAAAAAGAACTCTCAAGCATGACTGAGCTCAACAAACCATCAAACAACCATTCTACTGAAAATTATAATCAAAGAACATAATTTGAAAACCAAGAACATAAAAGGTCATCCACAACCTTGATAGGACAAAAAAGCTAACCATCTTATTGGATGAGAGGGACATCATCATGCCTGGTTATCAGTCTCCA	ACTAACGATCACCAGCTGCT	59.102	20	100	100	TGTTGAGCTCAGTCATGCTTG	58.851	21	100	100	100	290	389	ACTAACGATCACCAGCTGCT	59.102	20	100	100	TGTTGAGCTCAGTCATGCTTGA	60.224	22	100	100	100	290	389	CACCAGCTGCTCCTGTACAA	59.965	20	100	100	TCCTATCAAGGTTGTGGATGACC	59.8	23	100
nSSR_193	AAT	6|C6175714:1097-1514|+	6|C5840693:224-241|+	8|C4983032:226-249|-	N/A	7|C5805791:325-345|+	N/A	N/A	6|C5390631:229-246|-	0.8	0.38	0.98	GGTCCATTGCAATGAAAGTAATCTATTTGCCTTAGCAACCCCAAAGTCACGTAACCCTACAAAAACCCTTCCCAAAATACCCACCAATCATCTAAGAAAAAAGAGCTTCAAGATTCCCGAAATGTCCCCTTTCCTGTTGGTCTCTTTTGAAACTCAGTTAGCCGTTGTCACCATGCCCAATGCCCAAAACTTAAACCCTA	AAAAATAAATACAATGAAAAAAAATTCCCCTCTCTACTTCCCACAATGCCCCTACTTCCCAAAACATAATTTTTTTAGGGTGTTTATTATTAATGAACTTTGAGATTTATTAATAAAAATTCTTAGAGGTTACAATCTCATTTCGATTAATTAAATAACATATTGGTAACAATATAAATTCAAATAATTTTCTTAGAAAC	CGTTGTCACCATGCCCAATG	60.109	20	100	100	TGGGAAGTAGGGGCATTGTG	59.669	20	100	100	117	362	478	CGTTGTCACCATGCCCAATG	60.109	20	100	100	GTAGGGGCATTGTGGGAAGT	59.668	20	100	100	111	362	472	GTTAGCCGTTGTCACCATGC	59.832	20	100	100	TGGGAAGTAGGGGCATTGTG	59.669	20	100
nSSR_1931	TAAAA	5|C5920615:42-466|+	5|C6242983:1665-1689|+	N/A	5|C5223728:365-389|+	N/A	5|C6330388:735-759|-	4|C6995998:249-268|-	N/A	0.4	0.38	0.99	GATGAAGACTTCTCAACCATCATCTGAAGTGAAAGCAAAGCATTGCTGCAGAGGGATCTTCACAAAGCACAATCCATTGAACACCGCATTTCATCAAACACTTACTTCGCGTTCGACCGTTTGCTTGAACGATTCAAATGACAACCAAAGCCAGCAAAACTCCCTCCTGGCCATCAGATTCAACCCAGCCAATTTGAAAC	AATCGAACTTAATTTTCTCATCAAACAAATACTGGTTTTCAAACATCTCCATAGTCAACTCCAACCAGATCAGCAAGATTAAAAATAATAAAAATAATAATAGAAGAAAAGCAGCACACTCCACACAACCACAAAGTAAAATAGTAGAATAATATATAAAATACCTGGAAATCAAGATCTCCGATTTCTTGAAAAATGAG	CAAAACTCCCTCCTGGCCAT	59.96	20	100	100	TGTGTGGAGTGTGCTGCTTT	60.394	20	100	100	198	195	392	CAAAACTCCCTCCTGGCCAT	59.96	20	100	100	TTGTGTGGAGTGTGCTGCTT	60.394	20	100	100	199	195	393	CCCTCCTGGCCATCAGATTC	59.89	20	100	100	TGTGTGGAGTGTGCTGCTTT	60.394	20	100
nSSR_1933	TAAT	5|C6149119:575-994|+	N/A	3|C5323094:989-1000|+	4|C5283572:206-221|-	5|C5911913:571-590|+	2|C6366824:984-991|+	N/A	N/A	1.17	0.38	0.99	TAGCCTTCTGACTAAACTTACAAAACATCATACGTGAGCGCAATAATAAAAAACAAAATCCTATTCATTAACTAAGGTATTGCTCAATCAAGGTATATATTAGTCAAATTCTTCGGTTGAGGTTGTTTATCTCTTCGCATATTCTTGGCCACTACTTATTTTAACAAGTTTAAAACTCTTGATTTTTTTTCAACCATCGA	TATCGAGCCACTAACAATGATAAAGTTGATGGTAAGTGGGCATGGATTATGGAACCAATAATAAGAGGGAATTAGGACCATTGATGATGATGATGGGAAAGAATGGTTAGAAGATGATCCAAGAAATATTATTTTAGAGGTGAAGTATAACATAATAATTAAAAATAAAAAAGCTAGTTATCTTCTCTCTTGGATTATCT	TCTTCGCATATTCTTGGCCACT	60.093	22	97.75	100	TCCATGCCCACTTACCATCA	58.706	20	100	100	135	331	465	CTTCGCATATTCTTGGCCACT	58.708	21	97.6	100	TCCATGCCCACTTACCATCA	58.706	20	100	100	134	332	465	TTCGCATATTCTTGGCCACT	57.582	20	98.75	95	TCCATGCCCACTTACCATCA	58.706	20	100
nSSR_1938	TAG	5|C6204462:1440-1854|+	N/A	5|C5313244:603-617|-	3|C5312880:402-410|-	4|C6061691:919-930|-	N/A	5|C7077132:534-548|+	N/A	0.8	0.38	0.99	TCTCTAGTTGTTAACTCTGTACTCTATGTCTATCTTGATAAAGCCTCTTAGCAATTTCTTGTGCATGTTAGGTGAAGCCTATGTTGTCTTCAATACAAGCGATATGGCAGATTCAGTTGTTCGAAGGAGCAATGAAAGGTGTCTGATGCAAGAGAATGGAAGGTATTTTTCTTCTTGTTCTGCATATCCCAAAGATTCAA	TAAGCCCCACAGACTGTTTTGCGGCCATTATTTGGTTCATGCAATTTGTTGTTCCTGCAGACCTCTCATCTGCAGTAAAGGTATTCTGAAGATGCCATTGAAGTCATCATCATCATCTACATTCACTGGTCATTTAGTAATTGACAAAGTCAGACGCCAAATGCAATGGGATGAGGTGGTGATTATATCTTCACTTTTTG	TGTGCATGTTAGGTGAAGCC	58.466	20	100	95	AATGGCCGCAAAACAGTCTG	59.685	20	100	100	185	259	443	TTGTGCATGTTAGGTGAAGCC	59.114	21	100	95.24	AATGGCCGCAAAACAGTCTG	59.685	20	100	100	186	258	443	TGTGCATGTTAGGTGAAGCC	58.466	20	100	95	ATGGCCGCAAAACAGTCTGT	60.823	20	100
nSSR_1939	TAG	6|C6092686:361-778|+	N/A	5|C5330456:1524-1538|-	5|C5298800:711-725|+	N/A	5|C6343168:651-665|-	5|C6839834:344-358|-	N/A	0.4	0.38	0.99	AGTTTAAGTTGTTAATTACTCCTTTTGCTTTATTTAAGTCACTTGCTTTTCTAAAAAGCAAAGGATTCCCTTGTTGTGGTGGTGATAAATTAAGGCTTTGCCTCATTATTATTAGATCATGCCTTTCACTCACTTATTAATTTCTTGCTTTCTTTCTCTGTTTTGTATATGATATATTGAAGCTGCTGGATGCTGGCAAT	TAATAAGTCTTTTTTCTCTTCATCTATATATCTCTTTCAGGATTGGCCATGCATGGTTGTGATCTCCCCTTTCAAGGCAACATGAAAATAGTTTTGGGAGAATGATCCATGCATGTTTTATCATTTGTCTTTGATTTGGGACTTTGCACTCACTCTGCTCTGAGCTCTCTGCTTGGAATTAGAGAAAGGAAAATTAAAAG	ATTGAAGCTGCTGGATGCTG	58.896	20	100	100	GGGGAGATCACAACCATGCA	60.034	20	100	97.5	112	375	486	ATTGAAGCTGCTGGATGCTG	58.896	20	100	100	AGGGGAGATCACAACCATGC	59.743	20	100	98.75	113	375	487	ATTGAAGCTGCTGGATGCTG	58.896	20	100	100	TGTTGCCTTGAAAGGGGAGA	59.15	20	100
nSSR_1944	TAGG	5|C5969467:53-472|+	5|C6093480:475-494|-	N/A	4|C5376390:516-531|-	5|C5966695:186-205|-	5|C6349122:760-779|+	N/A	N/A	0.4	0.38	0.99	TTTGGTAGCCTGAGTGGCACTTGGGACTAGGTACGCCACATCCACTCCTAATTTTTTCTTTCTTGAGTTAAATCATGTCAAGCCTGAGCTCTTGAAATTACAATAAGCCGAGGTTAAGCCAACACGATCAAGCTAAGTTTCGAGCTGAAAATCAGCTGACTGGTCACCAATTATCAGCAGCTGCAGCAAACAGAGTGAGC	CTTTGAGAAGTTTAAGGCCCATGAACTTAACCCCATAACCAGCGGGCCCATAACATTCCTAGGCCTGGTCCTGTTGTGTTGCATAATGTAAACCCAAATTACTTCATTCTTTAAAAAAGTCAGATCCGACAGTCAACAATAACAATCTTACAATAGCAAACAGGTATCCCTGGCACCGTGCATGCATTGCATCATGCATG	CAGCTGCAGCAAACAGAGTG	60.04	20	100	100	CACAACAGGACCAGGCCTAG	60.036	20	100	100	121	229	349	CAGCTGCAGCAAACAGAGTG	60.04	20	100	100	AGGACCAGGCCTAGGAATGT	59.955	20	100	100	115	229	343	CAGCTGCAGCAAACAGAGTG	60.04	20	100	100	ACAGGACCAGGCCTAGGAAT	59.955	20	100
nSSR_1947	TAT	5|C6058300:403-817|+	N/A	5|C5209001:514-528|+	5|C5373332:1226-1240|+	6|C6066537:361-378|-	6|C6346424:1034-1051|+	6|C7020424:520-537|+	N/A	0.5	0.25	0.99	TCCTCCTCTACTCTCTAGGGTTTGGGAACGATTGAGGAATCGAAAAAGGCTTTGAACCCCTTTTCCCTTCTCTCGCTTGTTTCTTCTTCTCCAGCCGATGGCCCAATGCCGGGTCAGTCTTAACTAATTGCGCCAATTATAGATCATCAACAGAATGAACGGTTGAGATTACCCATCAGGATTTCTATTTCTTTTCTTTA	TGTTTTGCGCCAATTTTGACCGGAAGGAATATAACTTTAAAATTATAAATTTGTAGGAATTAATATTTAGGGCATGTTTGGTTAATCCAAAACTATAGCATAATTTTATTTATTATGGGGATTATGTCATATTGGGTGTTTAGGTTGGTTATTTAAAGGTATAGAATTATGTCATAAGATAGGGACCCTTTCACGATTTC	CCAATGCCGGGTCAGTCTTA	59.748	20	99	100	CCGGTCAAAATTGGCGCAAA	60.599	20	100	98	136	302	437	CCCTTTTCCCTTCTCTCGCT	59.384	20	100	100	CCGGTCAAAATTGGCGCAAA	60.599	20	100	98	181	257	437	CCAATGCCGGGTCAGTCTTA	59.748	20	99	100	CCGGTCAAAATTGGCGCAA	60.007	19	100
nSSR_1948	TAT	5|C6111770:583-997|+	5|C5999984:310-324|-	5|C5340663:708-722|+	N/A	3|C6073969:511-519|-	N/A	6|C6993960:542-559|-	N/A	0.98	0.38	0.97	TTTCAAGTCTGATGTTGTCTCAGGCCTCACCATTGCTAGCTTGGCCATACCTCAAGTAAGCAAACAGATTAAACATAGTAATCACAGAGAGAATGTTATATGTTCTTAAAATTAACTTCATATCTTCATTTGCAGGGAATCAGCTATGCAAAACTTGCAAACTTGCCTCCCATTATTGGTCTATGTGAGTCCCTCTTCTG	TAACTATGAGTTTCTTCAAATGGACTATGAACTCATGAATATACTTGGGATAAATTCATGCATGCAGACTCAAGTTTTGTGCCACCATTGATATATGCTGTTCTTGGGAGTTCTAGAGACCTTGCTGTTGGACCAGTGTCAATTGCATCTTTGGTCATGGGGTCCATGTTAAGGGATGTGGTGTCTCCAGACCAGGACCC	TGCAGGGAATCAGCTATGCA	59.452	20	100	100	GGCACAAAACTTGAGTCTGCA	59.595	21	100	100	168	330	497	TGCAGGGAATCAGCTATGCA	59.452	20	100	100	TGGCACAAAACTTGAGTCTGC	59.595	21	100	100	169	330	498	TGCAGGGAATCAGCTATGCA	59.452	20	100	100	TGGTGGCACAAAACTTGAGTC	59.252	21	100
nSSR_1953	TAT	5|C6220812:1603-2017|+	N/A	5|C5014555:284-298|-	5|C5151841:391-405|+	5|C5918373:264-278|-	4|C6030296:193-204|-	N/A	5|C5704923:627-641|-	0.37	0.25	0.99	TCATGTAAAAAGGGTACCCAAACGGGTAATATTTATTTCATAGTAATGGCCCATTCCATAATAATGAGGGTCGTTACTATGGAATATGGGTGCATCCAAACATACCCTAAATGTTTAATTTTCATATTATATAATAAATAAAATAAAAATGATATTTTATATCAAAACAATTAACACGGACCATTTAAATTCAGCTGAGA	TAGAGCCATGGAGCTAACCTATAATTGAGCTTGGCTCAAAAGTCAAGCTGAGTTTTGTTTGAGTTGTAGTTGGGGATGATCTGCTATGAAGTTGGGGGTTGACTGAGGCATGCATGCTGATGCACTAACCTTAAGAAGTATTTCGTCTCCTCAGAGTTTGTAACTCGGTGCATTACGACGTACTTCTCTTAGGATTCAAT	GGGTGCATCCAAACATACCC	58.889	20	100	100	CTCAGCTTGACTTTTGAGCCA	58.775	21	99.04	100	180	287	466	GGGTGCATCCAAACATACCC	58.889	20	100	100	TCAGCTTGACTTTTGAGCCA	57.653	20	99	100	179	287	465	GGGTGCATCCAAACATACCC	58.889	20	100	100	ACTCAGCTTGACTTTTGAGCCA	60.422	22	99.1
nSSR_1960	TAT	7|C6201872:734-1154|+	11|C6200993:529-561|-	N/A	N/A	5|C6014873:492-506|-	8|C6338472:937-960|-	7|C7121378:1260-1280|-	7|C5705021:407-427|-	1.8	0.25	0.98	TCATTATAAAAAGAATGAGATCAACTTAATCTCCAGTTACAAACTAAGTACAAGATTAACACTAATCCATCATCGATCAAGTTCATAATTAATTAAGTTATAAGTTTTGATGGATCATATTAATCAATCAATCAACCAAGAGTCCCCAATTACATTCCATAAATTATTACTGTCGCTCAAGTGATCACCACCAGTACTAG	TACCCGGCCATGACCATCCTGGATCAAACTCCATGTATCCACCAGGGCTCAGCAAGCACTGTTCAGGCCAGCAGCCTGCAGTACCGAGGAGGACTCCGGTACTGTTGTCAACTTCGGGAACGTCGGAGAGAGGTGGCGGAGCTTCGAAGGAGTCAGACGATGAGCCGGCGAAGCTTGAGCTGCAGTACTCCGGGCTGGGT	CGCTCAAGTGATCACCACCA	60.321	20	100	100	CGACGTTCCCGAAGTTGACA	60.596	20	100	100	173	373	545	CGCTCAAGTGATCACCACCA	60.321	20	100	100	GAGTCCTCCTCGGTACTGCA	60.68	20	100	100	144	373	516	CGCTCAAGTGATCACCACCA	60.321	20	100	100	AGTCCTCCTCGGTACTGCAG	60.682	20	100
nSSR_1961	TAT	7|C6208388:449-869|+	N/A	7|C5157091:440-460|+	9|C5306548:635-661|-	9|C5972319:356-382|-	5|C6291798:727-741|+	N/A	N/A	1.5	0.38	0.97	TTCTTGTTCTATCATGTAATTAAACAACTTGAGAAATCATCGTTATTCTTGTTATTCTTAGAGATCATCCAAGGCTTTCATTAGACTCAAAATTAAGTTTGAGGGTTTGTAATCGAAATTAATTGGAGCAATAGGTCTAAAAACAACTTCTTCGCTTGATGGAAAATACAAATATATCGAGTGAATAAAGCTTGAAGCTA	TTAAAAAATAGATAAACCACTATTTATATACAAGCAGTCATATGGTTACAAAATAAAATTGTTAATTAAAAGTAGGTAAACACCATTGAAAGTTGTATTTTCCGGCATGTTATATTTACAAACTATAATATTATTTATATATCATTATTATATCTTGCTAGCTTAAGTCATGAATTCGGTGTTCTCATGAAGAATTAAGA	ACAACTTCTTCGCTTGATGGA	57.874	21	100	92.86	ACATGCCGGAAAATACAACT	55.628	20	100	100	189	342	530	ACAACTTCTTCGCTTGATGGA	57.874	21	100	92.86	GCCGGAAAATACAACTTTCAATGG	59.375	24	100	97.92	185	342	526	ACAACTTCTTCGCTTGATGGAA	58.523	22	100	90.91	ACATGCCGGAAAATACAACT	55.628	20	100
nSSR_1964	TATC	8|C6203318:1509-1940|+	5|C5726073:187-206|-	7|C5263400:204-231|-	N/A	8|C5801319:368-399|-	N/A	5|C7081346:195-214|-	9|C5465667:295-330|+	1.53	0.25	0.97	AGACCCTTGAGATGAACAACTATTGGGAGACAAGTCCCGAGGGTTCAATACTACAAGTACATGTCCACACAGGAATATAAGTTTTTATAATTTTTTTATTTAAGAAAAAGAGTAAAAGGAAACAGAAAAGTGGGTCATATCTCAGAAACATGGCAATGTGACACAATAATGGAGCCTTCCATCATGTGGGTGGTGGCCAT	ATCCGAAGAGCTGGCTGGCTCATGGCTGAGGTTCCTCAAAAATACAAATACTATAAATTATACTCTCCAACTGTGTATTTGCTTACAGTATCTTTTCTGCACATTCTATATCACATCTAAAATCAATTGTATTGTATCTCATGAGATGTGATTTGATGATATTTTAACAAGTCATGTCATGAGACCTATCTATCTATCTA	CATGTGGGTGGTGGCCATT	60.61	19	100	90.53	AGCAAATACACAGTTGGAGAGT	57.642	22	100	100	133	382	514	AGAAACATGGCAATGTGACACA	59.042	22	100	90	TGAGGAACCTCAGCCATGA	57.913	19	100	100	127	343	469	TCAGAAACATGGCAATGTGACAC	59.995	23	100	100	TGAGGAACCTCAGCCATGA	57.913	19	100
nSSR_1965	TATT	5|C6092058:467-886|+	5|C6155255:225-244|+	N/A	5|C5326904:482-501|-	5|C6017251:914-933|+	N/A	N/A	4|C5652459:286-301|+	0.4	0.38	1	GAATGATATACTCTTGAAAATATTTTGGCAAGTCTTGAGAAAGACAGCATAAAGCTGACCACTACACTCTTGTAGGAATCCAAACATAAATATGGGAAGCAACAGACAAAGCAATCCTCAACATAACATGGAGAATGAGAATTTAAACTAAAATATCAATCAGGGATTTGAGAACTCCCACATCTAAAGTGCAGGATTTC	TTTACATCATAAACATTATCTTATTCTATTTTACATTGGCTTATCAATGAAAATATATACATATTTTCAATCTTCTAAAACCAACATGAAAATTATTCAATTTTTTCTAAATATAATATGAAAAGCCAAGATGGTCGACATATAGTAAACAGTCCGAAGTATAGTTTCTGCATAACCCTAAGAACAAGTATTCAAAAGAT	CTCCCACATCTAAAGTGCAGGA	59.763	22	100	100	GTCGACCATCTTGGCTTTTCA	58.849	21	100	100	185	374	558	CTCCCACATCTAAAGTGCAGGA	59.763	22	100	100	TGTCGACCATCTTGGCTTTTC	58.849	21	100	100	186	374	559	TCCCACATCTAAAGTGCAGGA	58.735	21	100	100	GTCGACCATCTTGGCTTTTCA	58.849	21	100
nSSR_1967	TATT	5|C6139105:475-894|+	N/A	5|C5334705:715-734|+	N/A	6|C6077567:1139-1162|-	5|C6398484:1857-1876|-	N/A	5|C5558625:308-327|-	0.4	0.38	0.98	TTCTTTAAATTCTTTAAATTTGGCTAAAATTCCACAATTAGAAACCAGAAAAATTGCTCCCAGAAAGTTCATATAGAATGATTCATCTGTTTGATTAAAAATCACTCCTCAAACATTATTTTCCATTTCTCAAACATTTTGAACACCAATCTACTATTGGCAGTGTATATATATTTATTTCCAATTTGAATCTTATTATC	ATCGGAGAAATGTGGGCAAACCTATATATATCATCCGAGTAAAAATTAGTCTAGGGGAATAATATTGTATAGCAATCCACCCATTATTTGATATTGTATGCATTTGTAAATATTAAAACATGATTCAGTTCCTCCCATACAACATCAATTGCAAGTTTGAACTTTCTTCAAGATATATGGCATGCATAGGCTAGAATTGG	AATTGCTCCCAGAAAGTTCA	55.138	20	100	98.75	GTTTGCCCACATTTCTCCGA	58.756	20	100	100	190	251	440	ATTGCTCCCAGAAAGTTCAT	54.898	20	100	97.5	GTTTGCCCACATTTCTCCGA	58.756	20	100	100	189	252	440	AATTGCTCCCAGAAAGTTCA	55.138	20	100	98.75	AGGTTTGCCCACATTTCTCC	58.367	20	100
nSSR_1968	TATT	5|C6177552:56-475|+	4|C6200203:442-457|+	5|C5278738:236-255|+	5|C5390044:1419-1438|-	5|C6073343:1718-1737|-	N/A	5|C7052252:598-617|-	N/A	0.37	0.25	0.99	TAGATTGCTTTGTTTAAATGCAAATTCATTGGATTGGATTTTGTGGCTATGGCTCTGTAAGTTACATCTTCGTGACATGTTTTGTTTGGAAAGGTTGATTTTCTTTTGACGTAAGCTCATGTTCATAAGCTTTTGGTCCATTCACAACTGTTGCTTAGGGGTCTTTTCTCTTAACTTCAAAGTTTTTAACTTAGGCTTCC	GCATGAATACAGTTGCTGTGAACTTACTTAAAAAACTCGTTGACCAATATAGGGCATGATGGGATTTGATTTCCTTGAACGAAAGAAGAAAAGGTGAATTTTGTATGACTATAGCCGGCAACTGCTAGATGACTACAGAAGTTGTTTGGTATCTGAGCATCACCTGTTAGATTTCCACTCAAGGTAAATCATACTTGCCA	ACTGTTGCTTAGGGGTCTTTTCT	59.862	23	100	100	AGCAGTTGCCGGCTATAGTC	59.895	20	100	100	200	201	400	ACTGTTGCTTAGGGGTCTTTTCT	59.862	23	100	100	GCAGTTGCCGGCTATAGTCA	60.179	20	100	100	199	201	399	ACTGTTGCTTAGGGGTCTTT	56.652	20	100	100	AGCAGTTGCCGGCTATAGTC	59.895	20	100
nSSR_197	AAT	6|C6217948:1555-1972|+	6|C6206855:553-570|+	6|C4949012:240-257|+	N/A	5|C6005963:833-847|+	4|C6098478:301-312|-	N/A	N/A	0.8	0.38	0.98	TCACTACAGGACATATATTTGCAACTTGTTATCATTATCAAGGTGAAACACCGAACCAAAAGAAGAAAATTTTCATTTTTTCTTGTTGGGAAGCCCATCATCCCAAAACTATAACTTTCACTACAGGAAATGTTTTTGGAACTTGTTATTATTATCAAGGTGAAACACCGAAGGCATAGAGATCGATGCACTTTCAAAAA	GATAAAGAGACAAATCCAATATTTTTTATGCCCTTAAAATTTGAGTTGGAATATATAGTCTTGCACAATAAAGGAAAATGAAGAAATGCTTCCCGTATGATGGGCATCATTTAACATTTCAATTGCAAAATAAGTCAAAGGGATTCACAGTTCACTCTCTATGATCTTCCATAAAAGACAAAGATGCTTGCAATAGAAGA	CCGAAGGCATAGAGATCGATG	58.126	21	100	100	CCATCATACGGGAAGCATTTCT	58.52	22	98.88	100	154	367	520	CCGAAGGCATAGAGATCGATG	58.126	21	100	100	CCATCATACGGGAAGCATTTCTT	59.115	23	98.92	100	154	367	520	CCGAAGGCATAGAGATCGATG	58.126	21	100	100	CCATCATACGGGAAGCATTTC	57.096	21	98.8
nSSR_1972	TATT	5|C6218344:483-902|+	6|C6028502:342-365|+	5|C5299028:211-230|+	N/A	5|C5955533:717-736|+	4|C6401744:3151-3166|-	5|C7124254:343-362|-	N/A	0.58	0.25	0.99	GAGGGTTTCTTAGGTTTATTGCTGTCCGAAGTTGTTTCAGCTGAGCTTCCATCATCTATGACTATTAGATGCCCTTCCCTTTGTATGAGTCGCTGCATTTAATTCGATTTCCATGTATCTCAGGTGCATAAAACTAAACAGGTAATTAATTAGCTATAACTGAAACAGTTTTTTAAAATTATTTAATTTTTAACTTTATA	TTATAGAGACAGTTAGTAGTCTTTATCTTCAATGAACAGACAATGAATAGGATACCTCGATGATAGCCTTAATGCATGTCACCTCTTCTACAACCTCTTCTGTGGAACTATATGCTCCTTGGGCGTTCTGCTGTTCTACATACCAAACGATGAGATCTTCTTGCTTCATCCCAGCCAGACCACTCCCTGCAAAAAACATC	TTCCATGTATCTCAGGTGCA	56.232	20	100	100	AGAGGTGACATGCATTAAGGCT	59.759	22	100	100	198	308	505	TTTCCATGTATCTCAGGTGCA	57.001	21	100	100	AGAGGTGACATGCATTAAGGCT	59.759	22	100	100	199	307	505	TCCATGTATCTCAGGTGCAT	55.996	20	100	100	AGAGGTGACATGCATTAAGGCT	59.759	22	100
nSSR_1973	TATT	5|C6219812:1898-2317|+	5|C6123899:702-721|-	N/A	N/A	5|C6030375:283-302|+	5|C6247946:422-441|-	3|C7109142:841-852|-	N/A	0.8	0.38	0.98	GTATCCTACGAATAGATCAACCATGGAGTTGTGAGAGATGGCTTGAACCCCACATTTGAAAATGCCAGGTTCAAGTCAGATCTGGTTCCGCTGATGGGTTGGGTTCTGCCATCTCAGATGAACAACCAAGCATGGTTCATCTTCACAGCTGCTACAAGAGGCCAAAATGCCATGAGTTTGGCTGAGTATATTTTTCATAC	TTATCTATCAACTATCATTATTAGTGTATTTCTTTTACTTACTGATTTGCGGTCTCACTAGGGTTAAACTATGGTTGATGTATTTACTCTTCATTAATATTTTATCTATTAGATTATTTATTTGCTTTGAACTTTGCTGATTTGCTGTTATCTACTCCAGACTGCTGTTCAACCTTTCCCAACCCCTGACATGCACTCCC	GGTTGGGTTCTGCCATCTCA	59.962	20	100	100	AACCCTAGTGAGACCGCAAA	58.947	20	98.67	95	189	296	484	GGTTGGGTTCTGCCATCTCA	59.962	20	100	100	CCCTAGTGAGACCGCAAATCA	59.793	21	100	80.95	187	296	482	GGTTGGGTTCTGCCATCTCA	59.962	20	100	100	ACCCTAGTGAGACCGCAAATC	59.793	21	98.6
nSSR_1974	TATT	5|C6223252:2856-3275|+	5|C6216283:235-254|+	N/A	5|C5314206:430-449|-	5|C6017257:859-878|+	N/A	3|C7141588:3457-3468|-	N/A	0.8	0.38	1	TCATTTATGCTTGTATAAGAGAGAATTGCAAGTATGCATGCATATTTATTACCATGTAAGTATGCAGTCATTTATGTTAAGTTGGAAGTCATGTTTGGTTAGTTCTTGATACAACTGTTGATACCCTGAGCTTGTGATAAAGTTGATGTTGGAAACTATTGGCAAATGTTCTTCACGCATAAACTGAACTCAGTCAGCCC	TTATAGCCATGTGGATATTCTAAATAATCACACCTTATCTGGCTGGCATCTATGTTCACCAAGGAACCTATTTCAATTGAGTGTGTTATGGGGATTGAATACTTGTCTTGTCCAATGAAATTAGTTGTCCTATTATTTCCAAAGGTCTATCTAAAGTGTAAATCCTTGGTATAATTGAATGCTCTATTACAAGTTTGATT	TGGCAAATGTTCTTCACGCA	58.972	20	100	100	TGCCAGCCAGATAAGGTGTG	60.035	20	98.75	100	109	359	467	TGGCAAATGTTCTTCACGCA	58.972	20	100	100	GCCAGCCAGATAAGGTGTGA	59.747	20	98.75	100	108	359	466	TTGGCAAATGTTCTTCACGCA	59.593	21	100	100	TGCCAGCCAGATAAGGTGTG	60.035	20	98.75
nSSR_1975	TATT	6|C6124949:47-470|+	6|C6089084:394-417|+	4|C5312992:795-810|-	N/A	6|C6056915:208-231|-	6|C6381156:1076-1099|+	N/A	N/A	0.8	0.38	0.99	TCCCCACTCCCTTTTTGAGCTCTGTGCCCCCTTTACATGTCCTCTCATCCCTCATCATGGGGTGAGTTTCCTACCATCATCTGGGTGGCTATCTATGCCCCTCCAGAGATAGGGTGGCATCTCTTAGGGATTGCGCCTCATCGTCACAAGAGGGGGAGCCGGGTTGATGTCGTGTGGAAGGAGTGATTCAAGGTATATCA	ACTTGAAATATTAATACAGTTTATATGGCAAGGGACATCACATAATCAATGACATATTGAGTGTTGCTGAAAGATTTACGCATGCACCAATCAACAAGGACAATCTCATCAAATATGTGAAGGCTATATATGAAAGCATTTTATTTCGAGCTGGAACAGCTGCAAAAATATTTCTCTCTCTCGGACTGTGGTTGACTTCC	TTAGGGATTGCGCCTCATCG	60.25	20	100	100	TTGTTGATTGGTGCATGCGT	59.327	20	100	100	198	169	366	CGGGTTGATGTCGTGTGGAA	60.602	20	100	100	TTGTTGATTGGTGCATGCGT	59.327	20	100	100	162	205	366	ATTGCGCCTCATCGTCACAA	60.673	20	100	100	TTGTTGATTGGTGCATGCGT	59.327	20	100
nSSR_1982	TC	6|C5975030:125-536|+	7|C6235909:776-789|+	N/A	N/A	6|C5834834:277-288|+	7|C6396042:705-718|-	7|C7069618:546-559|-	N/A	0.49	0.38	1	ATGACAAGATTGAAAGGAGGAAAACAAGAGAAGATACACAAGTACATACCTTTGGTTTCATGAGCAAGAGGAGCCATTAAATCCCCAAGGCTCCCCTTCTGCTTCAGGTACTGGCTCAACAGGTTACAAGTCACAGAGAAACTGCTGCTCTTCTCCTGCCTCCCCATCATCTTCTCTTCAGGAACACCACTTAAGGCTTT	TTAACCTTTCTTTTATCTCCTTTGCTTTTGGCTTCACCAGCACAAGCTTCTTATTGGAGTTTCTTTCTCAATGCTATAGTTTCCTTACTGGTGCTTCCTTCCTTCCTTGCTTTTGATTATTTGTAGCCACCCCCTAAAGAAACACGTGGAGAACACGGGGAAGACAAAGACCAGTTAAGTATTTTATAGATACACCAACT	CCTGCCTCCCCATCATCTTC	59.89	20	100	100	GGAAGGAAGGAAGCACCAGT	59.598	20	100	100	164	278	441	TCCTGCCTCCCCATCATCTT	60.328	20	100	100	GGAAGGAAGGAAGCACCAGT	59.598	20	100	100	165	277	441	TTCTCCTGCCTCCCCATCAT	60.328	20	100	100	GGAAGGAAGGAAGCACCAGT	59.598	20	100
nSSR_1984	TC	6|C5981378:76-487|+	6|C6201631:220-231|-	N/A	6|C5316640:398-409|-	6|C5979597:447-458|+	N/A	N/A	7|C5713937:473-486|-	0.4	0.38	0.99	GAACAAACTCCCATACATTCCAACAAACATCACACGTTCAAGACATGATGGCATCTCTTCTCTTGGCCTCTTTCTCTCACATTCCCCTCATGATTTTGCCACCATTTTGACCATCATCATCCTTTCATGCCCAGCAAACATCCTCTTTTGCTATTCAAATCACATCTATGTATGATGTATCCATCTCTATCTACCCTCTT	TTGCATGCTTAATCATACATCCCATTTCTTAAGACACAAGCACACACACAATGTGCACAAGAGGAACTTTCCAAAAATAAAAGGAACTTGGTGGGCTCTCCATTTGCAATTCTCAAAGACATAATAATAGTTTAGTGTTCCTGTTGACTTCAAAGTGTTCAACTTCAAAGTGACTCTTTAGTGGGACCAGAAGGGAGTAG	TCATGCCCAGCAAACATCCT	59.96	20	100	100	GAGAGCCCACCAAGTTCCTT	59.598	20	100	100	188	199	386	TGCCCAGCAAACATCCTCTT	59.887	20	100	100	GAGAGCCCACCAAGTTCCTT	59.598	20	100	100	185	202	386	TCATCCTTTCATGCCCAGCA	59.668	20	100	100	GAGAGCCCACCAAGTTCCTT	59.598	20	100
nSSR_1985	TC	6|C5989354:212-623|+	N/A	6|C5298114:645-656|+	6|C5306712:530-541|+	6|C6000741:731-742|+	N/A	5|C6778011:323-332|-	N/A	0.4	0.38	0.98	ATGCTACATTTTCGTTTGGCCGAGTACTTCATCTTTTTGGGCCACTAAAGTATTTTAGCGTTCTCTATATTCATGAGGATCTCGGTCCGACTTATGTTATTAGGAGCATAATTGAGTTAACTTGCCTCGGGCTTGCTGACGTCATCCTGAGTAGATAACTTCTATTTATTGAGCTGCTTTCGCGGCTCCTGCACTGGGTT	TTAGATTTCTCTAATGGGACCTTTTCTCGCTTAGCGGACTGTTTCTCCTCAGCATTAATATTATTTTCCCCTAGCAATGAGATCGACAGGATTTTTCGGCGGCTTCTTAAATAAAGAGAATTAAAATGGTGACTTGCGCATCCGTTCTATGAGCAATGCGACTGTAAAGGCCTGGTTTAGTACGCACTTCTAGGGTCTCC	TGAGGATCTCGGTCCGACTT	60.034	20	100	100	AGGAGAAACAGTCCGCTAAGC	60.067	21	100	100	188	273	460	TCATGAGGATCTCGGTCCGA	59.817	20	100	100	AGGAGAAACAGTCCGCTAAGC	60.067	21	100	100	191	270	460	ATGAGGATCTCGGTCCGACT	59.816	20	100	100	AGGAGAAACAGTCCGCTAAGC	60.067	21	100
nSSR_1987	TC	6|C6005258:114-525|+	8|C6150173:271-286|-	N/A	5|C5111207:252-261|-	8|C6043681:303-318|-	8|C6390008:1146-1161|-	8|C6834786:314-329|+	8|C5702281:755-770|-	1.16	0.12	0.99	CTCAGTGCTCTTCTAGAATATCCTTTGACAAACTCCATCTTTTCATTGTTTGCAAACCCATAATCACTGTTCTTCATCATGTTCTCCAACTCCTTCCCATCAGGAACAACAGGAGGAACGAAGGCTCGTGCTCCCTCAAAACTGAAATTTATCGGAAACAAAAGGAGAACCACCAAACATATTCTGGAGCTCAACATCTA	AGTGTAGCTTACCAAATGGACGAGAATATGGTTTATATAGAGTTTGAGGGGGACGAACACAATGTCTAAAAGGCTCTTGAAACGAAGAAAAAAGGTGTCAATGTCACTAATTAAGATTTCGTGGTTTGTGGAGATTATCTTTGATTTGTCTGACGGTTAAATGTCACAAGAGCGCATGATCTGTTATTAGAGTATTTTAG	CAACAGGAGGAACGAAGGCT	59.965	20	100	100	TCTCGTCCATTTGGTAAGCT	56.557	20	95	100	131	219	349	CAACAGGAGGAACGAAGGCT	59.965	20	100	100	TCTCGTCCATTTGGTAAGCTACA	59.488	23	95.7	100	131	219	349	CAACAGGAGGAACGAAGGCT	59.965	20	100	100	TCGTCCATTTGGTAAGCTACAC	58.408	22	95.5
nSSR_1991	TC	6|C6026578:182-593|+	3|C6078086:577-582|+	N/A	3|C5392932:289-294|-	3|C5848978:286-291|+	3|C6202966:350-355|+	N/A	N/A	1.2	0.38	0.97	CTTCGGTCGTCGGCGGGCGTCGAGTCTCGCTAGGCACAGGCGCGCGCGAGGGAGAATGGGCTGAGCGGTCGGGCTCGGTCACCTGAGGAGAGAGGTGCGCGTCGCTCACCGGCGTCCATAGACAGCAGGGGAGAGAGGAAGGAGGGAGCACTCGCTATTCACGGGAGAGAAGAGAAGGGACGAGAGAGGCGAAATGTTTT	ACACTCATCAGCCTTTTTAAATAAACCCCTTTATTAATATAATAATCAAGGTGTTACTATAGCTTAACGAGTTGGTGTCTCTTTCTCCAACTGGATCTATGAAATCCGGATCTAAATTGATTGCACTTATTACGGGCGTACTGTAGTAATCACGAGTTTATCTCCATCCCTGACCAGATCCACTTTTCTCGGGACTCCAA	GGACGAGAGAGGCGAAATGT	59.826	20	96.25	100	AGTACGCCCGTAATAAGTGCA	59.522	21	98.8	100	177	358	534	GGGACGAGAGAGGCGAAATG	60.529	20	96.25	100	AGTACGCCCGTAATAAGTGCA	59.522	21	98.8	100	178	357	534	GGACGAGAGAGGCGAAATGT	59.826	20	96.25	100	CAGTACGCCCGTAATAAGTGC	59.143	21	100
nSSR_1997	TC	6|C6100382:347-758|+	6|scaffold11282:515-526|-	N/A	N/A	7|C6084223:1981-1994|+	N/A	6|C7138946:967-978|-	6|C5746541:676-687|+	0.4	0.38	0.99	GTTTCCCAGTTTGGTTACGTGATGTCCCTGACATTGAATTCCGAACTGACAATGCACCATTTAAGGTATTATGTTTTGTTAGAATGAACTTGCTACAATTACTTTTTGATATGTATATGATTTATATCTGAAGGGACATTATAATCTTATTTATTGAATTTAATTGTGGCAGAGTGCCATCTTCCCATGTTAAATGAATA	TAAAGTTAGTTTTTTATATTTTCAGAAAAGGTCATCTACAACATAAATCTTATTAGAAGCATATGATACAAGAAAATCATATAATTTACTTAAACAAGATTTGGTGGACCTTAACATACTTGATTTGTTCATCATCATTTTGCACTTGCTGGTTGAGATGCTTGTATAATAAGAACATGATTCCTTGAATGAATGATAAG	GCAGAGTGCCATCTTCCCAT	60.107	20	98.75	100	TCAACCAGCAAGTGCAAAATGA	59.57	22	95.5	100	200	368	567	GCAGAGTGCCATCTTCCCAT	60.107	20	98.75	100	ACCAGCAAGTGCAAAATGATGA	59.371	22	95.5	100	197	368	564	GCAGAGTGCCATCTTCCCAT	60.107	20	98.75	100	CAACCAGCAAGTGCAAAATGA	58.176	21	95.2
nSSR_1999	TC	6|C6115688:373-784|+	N/A	N/A	5|C5350790:361-370|-	6|C5682103:299-310|-	N/A	7|C7122042:519-532|+	5|C5689103:474-483|-	0.75	0.38	0.96	CCTCTTTCCTTTCTTTTTTTCTTTTTTTAAGATTTTGATTGGGACCTCAGACCATCTTTCACTTGAAACATTCAAGAATATATTTATTGTTTTTTATTATTTTATCTATTTGTTATCTGTTTTAAATGTTTCTTTTTAGCCTCTTCAGTGCTGTTTGAATGGTAACCAGTCAAGGAGATGTGATATAGCATGAGAAATTT	TGGTTGAACAAGTCTTTCCCACTGAAATTAAAAACTGTTGATCTTTCAACATTCTTTTCATGTTTTGGTTTCTTAATTCTACTTAATTTGCACAGCAACAAATGGATAAAGAACTGAGCTTCTTGGCCTAATTGAGTTGTTGGACTATGACATTTAATTGATGCAGATGTTACAACTAATTTACAAGCATATATCTACTA	TGGTAACCAGTCAAGGAGATGTG	59.992	23	97.85	94.57	AGGCCAAGAAGCTCAGTTCT	58.937	20	97.5	100	182	359	540	TGGTAACCAGTCAAGGAGATGT	58.752	22	97.75	94.32	AGGCCAAGAAGCTCAGTTCT	58.937	20	97.5	100	182	359	540	GGTAACCAGTCAAGGAGATGTGA	59.739	23	97.85	95.65	AGGCCAAGAAGCTCAGTTCT	58.937	20	97.5
nSSR_2	AAAAC	5|C6217712:553-977|+	N/A	N/A	5|C5285722:424-448|+	5|C5931409:417-441|+	4|C6397056:1774-1793|-	N/A	6|C5751823:1575-1604|+	0.63	0.38	1	TCCATCAAGATGAGTTGAGACCCAGTAGACAATGTCTTTCCCTTCACCGAAGATTGGGTCTGTGGGGCTATGCCCTGTCAGTAATTCCAGCAGCACAACTCCATAGCTATATATATCACTCTTCTCTGTCAGTTTGACTGAATATGCAAGCTCTGCATTGAATTAAAGATTCACAATCAGTGATTCTCAATTGAAAGGAG	AAAATTAATGCAACACACCTGGAGCAATGTAGCCATGAGTACCAGCAAAGCTAGTCAATTCAGACTCCTCTGCAACCTTTGCAATCCCAAAATCAGAAATCTTTGCTTCATAGTCTTCATCTAACAGTATGTTTGTGGATTTGATGTCTCTGTGAACAATGGCAGGTGAGCAGTCATGGTGTAGATACATCAAGCCCTTG	TTCCAGCAGCACAACTCCAT	59.889	20	100	100	GGCTACATTGCTCCAGGTGT	60.035	20	100	100	175	284	458	ATTCCAGCAGCACAACTCCA	59.889	20	100	100	GGCTACATTGCTCCAGGTGT	60.035	20	100	100	176	283	458	TTCCAGCAGCACAACTCCAT	59.889	20	100	100	TGGCTACATTGCTCCAGGTG	60.035	20	100
nSSR_20	AAAG	6|C6114226:490-913|+	6|C6240177:2329-2352|+	6|C5164255:248-271|+	N/A	7|C5939981:266-293|+	6|C6362092:985-1008|+	6|C7137212:403-426|+	N/A	0.37	0.25	0.99	CTTGAAAAACTAAGAAGAATAAGATGAAATATTACACAAGAATCTATGTGAAAGAGAGAGAGAGTGAGATCAGTAAGAAGAGCCAAGAGTTCACTAAAATCCATGCAGTAGTAGTACCCCAAGAATTCGTTAGGATAAATAAACCTAAGACCAGAGAATCAGAGATAGCAGCCATATAGAAGGACAGATATCACTGAAAC	AAAAGAGAAGAGAAGGTCATGAAGGAAATATAGTAAAAGAAAAAGATGGAAATGAAATGAAATGCAGGAAAATCAGAGTCCATGTATCTGTCAATGTCTGAGAGGAATCTGGGTTTTCGTCTGCTTTCCCGCAGACCAAGGCAGCCAGTCTCCATTGGAGAGGATGGAGATAAAGCAAAGGGCCCCTCATGCAGTGCCTG	AGCAGCCATATAGAAGGACAGA	58.419	22	100	100	CGGGAAAGCAGACGAAAACC	59.763	20	100	100	189	366	554	AGCAGCCATATAGAAGGACAGA	58.419	22	100	100	GCGGGAAAGCAGACGAAAAC	60.386	20	100	100	190	366	555	AGCAGCCATATAGAAGGACAGA	58.419	22	100	100	GGGAAAGCAGACGAAAACCC	59.403	20	100
nSSR_2001	TC	6|C6145437:339-750|+	N/A	6|C5288536:709-720|-	6|C5374198:709-720|-	N/A	N/A	5|C7070940:551-560|-	4|C5380989:265-272|+	0.8	0.38	0.99	AACTCCGGGCAAGCTTGTCCAAGACACCAAAAGGATCTATCTACAATTTACTTGACGCCCAAGCAATGGCTTGTTTGGCAACTAAGTCACCTCCAACCGTCCAATCGCCTCTCGGAAGGTATAAGAGGGGCTAAGGAGAGAGAGCAGGGGAACTTCCTACTCCGAACTAGAACCACCCCACAAGCTCCAGCTCTCTCAGA	ACTCGCTCATACTCCTAGCTCACTCCCCACTCAATCTTTGATCCACTTTCTCCTATGAATTTCTTTGAGAGAGATCTTTGTCTGCCTCCTCCACCCCTAGATCCGGTTTGGCTAACTTGATCGTCAGAGAGTCCGAGGATAGACCCTGGACTTCCCTTTATAGATCGAGCCCGTCCCCGAACTTCAACAACAGAGGGTGT	GTCACCTCCAACCGTCCAAT	59.964	20	100	100	AGTGGGGAGTGAGCTAGGAG	60.033	20	100	100	158	285	442	GTCACCTCCAACCGTCCAAT	59.964	20	100	100	GAGTGGGGAGTGAGCTAGGA	60.033	20	100	100	159	285	443	AGGGGCTAAGGAGAGAGAGC	60.106	20	100	98.75	AGTGGGGAGTGAGCTAGGAG	60.033	20	100
nSSR_2003	TC	6|C6152955:308-719|+	6|C5879204:246-257|-	N/A	N/A	6|C6015087:456-467|+	6|C6285418:508-519|+	7|C7057948:761-774|-	N/A	0.4	0.38	0.99	GATTATTGATTGATGATTAGTGTTTGATTATTGAGTTCTGATCTTGCAGGTTGAGAGGGTGATCAAAGAACATAACATGCTTCAAGTTCTTCTCTCTGTCCAAAGAAGCCTCCAACTCTTAACTGAGAAAATCCCTCAGATTCAAACTCACAGGTAAAACTCTAAAACCCTAATTAATACTTCATTAACCACCTCTTTGA	ACTCTCTAAACTGAAAACCATGCATACATGCATGATATTTAGATTGTGTCCTAATGAGCTGAGAGAAGCAGTGGCAAGCTTGATCTTTGCAGCACCAAGGTGTGGAGAATGTCCAAAACTTAGGAAGCTTAGCCTGCTGCTCCAGTCATGGTTCCTCAAACACTCATTTGCAACTGCAACTGAAGCTAATCAGCAGGTTA	CTCTGTCCAAAGAAGCCTCCA	59.651	21	100	100	AAGCTTGCCACTGCTTCTCT	59.89	20	100	100	200	293	492	TCTGTCCAAAGAAGCCTCCA	58.566	20	100	100	AAGCTTGCCACTGCTTCTCT	59.89	20	100	100	199	294	492	TGTCCAAAGAAGCCTCCAACT	59.505	21	100	100	AAGCTTGCCACTGCTTCTCT	59.89	20	100
nSSR_2006	TC	6|C6176286:876-1287|+	5|C6240195:2096-2105|-	N/A	N/A	N/A	5|C6280650:330-339|+	5|C7135270:1773-1782|-	5|C5384289:235-244|-	0.4	0.38	1	AGGAATGAAAAAGCAGTGGTAACAGGCAGAGAAGATAACGGTGATACTAAACTGGATAAGAAAAACAGAAAATCTTTAAAAAAGAAAAAGCTATTGACTGCACGCAGTTATAGGGCATTGCTTAGGGTAGAGAAGTCACAAAGATCAGGTACATGCTTCTTTCCTCACAAGTTATCTTAACCAAAACCACCCACTCCCAA	TTTATATATATATCTCTAATCTATTTATATTGCATCCTCATTCTGTCAATGTTTGTCTATGTTATAGATGCTACAAGGATGCTTGCAAAAGAGGTCTCCCAACCAACCGAAGTCAATTCAGGAGCCGATGATTCTGAAGAAGTATGGAACAGTGCTTCATCACAAAATGAATGCATTGGACAAAAGGATTTTGACCTTAA	CCAAAACCACCCACTCCCAA	60.398	20	100	100	ACTTCGGTTGGTTGGGAGAC	59.892	20	100	83.75	145	380	524	CCAAAACCACCCACTCCCAA	60.398	20	100	100	GACTTCGGTTGGTTGGGAGA	59.605	20	100	82.5	146	380	525	CCAAAACCACCCACTCCCAA	60.398	20	100	100	TTGACTTCGGTTGGTTGGGA	59.453	20	95
nSSR_2009	TC	6|C6201204:835-1246|+	6|C6195965:669-680|+	6|C5316284:1325-1336|-	6|C5131195:360-371|-	6|C6052785:1175-1186|+	N/A	N/A	4|C5561561:467-474|-	0.75	0.25	0.98	ACTTACTTGTATGAGATTAATAAAACCCTAAAAAACTCTCCGTCCATAGATACGCCAATCTCCATCTCCGGCCTTTGAAGCCCTCTCTCCTGGCCTCCTCCTCGTTAGGAATCGGCACTGCTTCGATTCGAGCTCCCTCCCTTCTCTTCTCCCTCACCGGAGCGCCTCTCTCCACTTCCCCGCCGGTGAGTCTCTCCCCA	ATTGGTTTTCGATCGGTGGTTCGGGTTTGTGGTCCTAATTCGTTGTTATATCAATGACCGGAGCCCCCGCCATCTTCTCCATCTCTACCTCTTCGTGTTGTTCACGCCGTCCTCTCTTCTCCTCCGGTAAGCGATTTAGGGCTTTGATATGGTGGCTTGGCTTCGGTATGCTTGTGAGGTACTGACTCGGAGAGATTTGG	ATTCGAGCTCCCTCCCTTCT	60.032	20	95	100	TAGGACCACAAACCCGAACC	59.602	20	96.76	96	124	325	448	ATTCGAGCTCCCTCCCTTCT	60.032	20	95	100	CGAACCACCGATCGAAAACC	59.559	20	100	94	110	325	434	ATTCGAGCTCCCTCCCTTCT	60.032	20	95	100	CCGAACCACCGATCGAAAAC	59.559	20	100
nSSR_2010	TC	6|C6202232:122-533|+	6|C6242315:446-457|-	N/A	6|C5316978:324-335|+	5|C5739971:298-307|+	N/A	6|C7071736:536-547|+	6|C5642199:299-310|+	0.37	0.25	1	GATGATTGCATGGTAAGGAAGTGAAAATGATATAAAAAAAGAGTAATGGCCTACAAGAGTAGTTACTAACAACCTTGACTCCTAAGCAGGGTGATTAGGATTAGAGAACCACCACCCCCACTTGGTGTTTGAGTAGCTTATAAGCAAATACCCAACATTTCCTTCTCAATCCATCACTAAATCATCCACTAGTTTTAGTT	TAGGAATAAATCTAAGAGTAGGACACCAAGAAGCATTAATGCTTTTTACCCAAACTAGGAAATCTAAGAGTAAGACACCAAGAAGCACATTAAGAGTCAGCAAAGTTGGTGGCTCATGAACACTTGAATAAGATTCATGGTGGTTGTTCAACATTCTCCTAATGTTTTGATAATTGAAAGAAAGCAAGGAAAGCCCACTA	CCTTGACTCCTAAGCAGGGT	58.72	20	100	100	TGCTTCTTGGTGTCCTACTCT	58.39	21	100	100	175	193	367	ACCTTGACTCCTAAGCAGGGT	60.485	21	100	100	TGCTTCTTGGTGTCCTACTCT	58.39	21	100	100	176	192	367	CCCAACATTTCCTTCTCAATCCA	58.911	23	100	100	AGCCACCAACTTTGCTGACT	60.107	20	100
nSSR_2011	TC	6|C6203466:1439-1850|+	6|C6240821:867-878|+	6|C5247757:182-193|-	5|C5366514:843-852|+	N/A	N/A	5|C7138762:2466-2475|-	N/A	0.49	0.38	0.98	TTGAATTGTTGATTTGCTCTTTAAGCAAATATTATGAATAAATGGATTTTTATTTCCCCTTAATTATTTTGTTAATTGAATGAATTCCCTAACCTTGGATTAATTGGGAAAATGTGATTAAATCTTGATTTGAGTTTATTGGGGTTATTGAGGACTAAAATATAATTATCATGAATATCAGGGACTGAACCCAAATTTTG	AGTCTGAAACATGTAAGGGTCTAAATGTGAATATGGATAAGTAGAGGGACTTACTTGTAAGAGTCCACGAGAAAATCATCCACGTAAATAGCTAGAGTTAATGTGGACGATTAGGATTGATTTTGAGTTTTAAATTGATCATCCGACGCCGACGGTTCTTATCTTACCACCCAACAGTGTTGAAGGGGAAAAAACACGTG	GGACTGAACCCAAATTTTGT	54.256	20	97.5	100	CGGCGTCGGATGATCAATTT	59.063	20	98.75	100	182	381	562	GGACTGAACCCAAATTTTGT	54.256	20	97.5	100	CGGCGTCGGATGATCAATTTA	58.868	21	98.8	100	182	381	562	GGACTGAACCCAAATTTTGT	54.256	20	97.5	100	CGGCGTCGGATGATCAATT	58.395	19	98.67
nSSR_2013	TC	6|C6208542:1395-1806|+	6|C6135219:744-755|+	7|C5041459:287-300|+	6|C5121873:325-336|-	7|C6044269:1301-1314|+	N/A	N/A	N/A	0.49	0.38	0.99	AGAAGAAGAAGTGGAAGACAGAGCCTGTGGCGGTCTTGGTGGAATCATCTCCGGTGTTGTAATTCTCATTGTGAGGTTGAAGATCATTAGATTTAATTGGCTTGGTCGGACGGCGACGCTGATGACCGTGGCTGGATGTAAGGAAAGGAGTTGAGATTAATTATTAATTTGTCTTCTTTTTCTCCACCACCTCCAATGTA	TTTCCCAAATTGCTCACCATTTCCCCCAATTTCTCATTCCATGATCCGCGATTCTACTAGCAAATCGATCAAGATCTCAACTTTTTCAGAAATTTTCAGATTTGTTCGTCTTCATGCGTTATGTTCTTCCCATTTTTGGGCCCAAAGTCGCCCATCTGAAGACCTTTTGTTGGTTCTTAAGCTTGATTCGATCTCTCATT	TTCTCCACCACCTCCAATGT	58.555	20	100	100	GGTCTTCAGATGGGCGACTT	59.749	20	100	100	197	379	575	TTCTCCACCACCTCCAATGT	58.555	20	100	100	TTCAGATGGGCGACTTTGGG	60.322	20	100	90	193	379	571	TTTCTCCACCACCTCCAATGT	59.22	21	100	100	GGTCTTCAGATGGGCGACTT	59.749	20	100
nSSR_2015	TC	6|C6214830:1685-2096|+	6|C6085544:354-365|+	6|C5328114:1489-1500|+	6|C5397140:321-332|-	6|scaffold22825:1747-1758|+	N/A	5|C7082220:381-390|+	N/A	0.37	0.25	0.99	CCAAACAACACATCCCTGTCTCTATCTCACAACACTCATGCACATGCACGTCCAAAGATTACAGTAGATGATCATTAAAACACCCACAGAACTCCAACTAAAGGAAGGCAACAAAGGAAACAAGCAATCACCCGAGACGACCAACGGCTAGAGACGCTTCGGGGAATTACTCTGACGACGTCCTTCTGCGCCTCCTCCCT	TGTCTTCCCCTATCCCGACGAACTCTGGCCTCGCCGCCGTTGCACGAAGGGCTCTAGGGTTGCAGGGGCTACTTTTCCTCTTATAGATTCCCGGAGACCTATTTTGATTCGAAGATAAGGTTATTTTGATTTCAAGATTCAAAACACGTTTATCCGATCGCGAACGCGGAGGGGTCGTTCGTTCGCGGAGGCGCGTCGCC	AATCACCCGAGACGACCAAC	60.038	20	100	100	GCCAGAGTTCGTCGGGATAG	59.969	20	99	100	116	325	440	CAATCACCCGAGACGACCAA	60.038	20	100	100	GCCAGAGTTCGTCGGGATAG	59.969	20	99	100	117	324	440	AATCACCCGAGACGACCAAC	60.038	20	100	100	AGTTCGTCGGGATAGGGGAA	60.033	20	99
nSSR_2017	TC	6|C6220030:150-561|+	5|C5902228:188-197|+	5|C5285030:357-366|-	5|C5171237:431-440|-	5|C5948651:290-299|+	N/A	N/A	N/A	0.4	0.38	0.99	ATGAATCCTTCATAAATTAAAGATAAATCATAAAATAATGATAATAATAACATTCAAAATAAGTTCCAGCCTTACACGGAGGTAAGATCACCGAGGTCGGTTACCCGAATCCAACGTCACTCTTCCAGAGCCCTCTCTGCTGTTCTGCCAGGACAAGCATTCCGTTGTTTCCGCGATAACGAAGCCATTCTTTTCCTCCA	CCCGCTTCCTTAACTCTCAAGAAATCTACGAGCGATATCGTGTCTCCTTTTCCTTTCTTGAATTCAATCTCCAGCTTCTCCGGACCAGCAAGGTCATCCTGCTTCCCTTTTTTCAATCCTCTGAATTGTTTATTATCAGCTTCTTGATTTCTTTTTTTAATGTGTTTTAATTTATGGGTATTTACTGCGTGGTTGATTGA	GTTTCCGCGATAACGAAGCC	59.974	20	100	100	GGAAGCAGGATGACCTTGCT	60.035	20	100	100	152	315	466	GAGCCCTCTCTGCTGTTCTG	60.108	20	100	100	GGAAGCAGGATGACCTTGCT	60.035	20	100	100	191	276	466	TGTTCTGCCAGGACAAGCAT	59.889	20	100	100	GGAAGCAGGATGACCTTGCT	60.035	20	100
nSSR_2019	TC	7|C5727380:13-426|+	N/A	8|C5004235:328-343|+	8|C5239382:311-326|-	7|C5842952:202-215|-	N/A	7|C7035544:422-435|+	N/A	0.49	0.38	0.98	AACTAAATCTCAATTATCAAATTACTTGTATGTATTATCTCGAAGTTGTTAAAGAGGTCATATTTTGTGCTAATTGAAAACAAACAGAAATCCATTCACCTTGTAATACTTGATTTTCTAAAGAAAGATATAATTATTAAATCACATCACCATTATTAATAGAAATAATAGCGCTATGCAATATCTTTATACTTCTACCA	AACACTTATTTTGTTTCATGTGCTATTTTCATTTGTATTTGAGCCTCTAATTCAGTGGCAACTCCATCTATATTCCTTACTGTTCCAGCTTTGGGACCAAACAAGCTTTTTAACAAGTTGCAACGTTGTACTAAATTACACAATCAATAAATGAATGTGGTTTATCCACTTTAATTAAAAAAAAAAAAAAAAAAAGTTGC	CAGAAATCCATTCACCTTGT	53.456	20	100	100	TGGAGTTGCCACTGAATTAGAG	58.057	22	100	100	196	96	291	ACAGAAATCCATTCACCTTG	53.456	20	100	100	TGGAGTTGCCACTGAATTAGAG	58.057	22	100	100	197	95	291	CAGAAATCCATTCACCTTGT	53.456	20	100	100	TGGAGTTGCCACTGAATTAGA	56.932	21	100
nSSR_2020	TC	7|C5772968:38-451|+	N/A	7|C5122991:449-462|-	N/A	7|C6073017:1904-1917|-	7|C6101572:225-238|+	N/A	8|C5357935:245-260|-	0.4	0.38	0.99	GTGTTCTTGAAGAAACGCGCATCAAGGGGCAGAGAAATCAAAAAGGGTTAGGGATTCAGACCTCTCGGCGTCTGGGGGAGGGTGCTGGCCGCGAGATGGGGAGAAGAGGTCGAGGGCACGCTTAAGAGACTTGAAGTTCAGCTTCTTCAGCGACTGCGGTTCCACTGGCTCCATGGCCGCCGTCGGTCCCTCCATCGCCT	ACCCTCCGGAGACCTTCCAGTTCTCGGGACACTGCGGACTTAAGTGCGATCGAGGGTTTTATCGGAGTCGGGTAAGATATTAATAGATCCGAATCGAGAACCAATAATGCACAATTGAGAGTTTTTCGGATTCGGGTGACGTGTAAATAGATCCGAATCCAGATCCAATGATGTTGTTGAGGGTTAACCGGATTCAAATC	GAGGGCACGCTTAAGAGACT	59.467	20	100	100	GTGTCCCGAGAACTGGAAGG	60.037	20	100	100	135	148	282	AGATGGGGAGAAGAGGTCGA	59.368	20	100	100	GTGTCCCGAGAACTGGAAGG	60.037	20	100	100	153	130	282	ATTCAGACCTCTCGGCGTCT	60.682	20	100	100	GTGTCCCGAGAACTGGAAGG	60.037	20	100
nSSR_2021	TC	7|C5853692:40-453|+	7|C6110481:336-349|+	8|C5304612:671-686|+	N/A	N/A	7|C6207158:193-206|-	6|C7039992:191-202|+	N/A	0.63	0.38	0.99	CTATTTCGTTATCTTTATTTTCGTTTATATTCTAGCCTGGTCAGTAGTCGTGGGTGTAGTGGAGTCATGGAGATGTGACGTTCCCATGCAAGACGTGGCGCAGAGGCGTTACGTGGTGCAAAGGCGTTATTCTCTTTTCCTTTAAAAGCTGGGGTTTGTAAGGAGAGTCTTGTATCCAAGTTATTAGTAAAAGCTTGCTT	CCTCTCTTATCTCCTTCTTATCCCTGGAGTGCACACCTACTCGAAAGGTTTTATCGTTGCGATTCCGATCTAGGGTCGTAACAGTGGTGCTTTCATTGAGAGGGCCACATTCCACCCTCTCTATCCATGGCAGAGTTTGATTTCCAGGGAGCAATCAAAGAGCTCCAAACCCAGCTTGATAACCAAGCAATGGTACATCA	TGTGACGTTCCCATGCAAGA	59.892	20	100	100	CGAGTAGGTGTGCACTCCAG	60.109	20	100	100	184	112	295	CGTGGTGCAAAGGCGTTATT	59.76	20	100	100	CGAGTAGGTGTGCACTCCAG	60.109	20	100	100	146	150	295	CGTGGTGCAAAGGCGTTATT	59.76	20	100	100	CGACCCTAGATCGGAATCGC	60.11	20	100
nSSR_2023	TC	7|C6003632:245-658|+	7|C6072954:413-426|+	7|C5318190:539-552|-	9|C5326156:409-426|-	N/A	7|C6314274:246-259|+	7|C6947122:491-504|+	N/A	0.75	0.25	0.99	GGAAGTCATAACGCAAGTCCACGTAGACAGATGACAAAGGGTGTCACAATTGCGGTCTCTTTTCAGGGTGTGTTAAAATGGCCATTTTTTTTTTCTAAGAAGCGGGGCCCACATAGTCCTCCTCACACTCTTTTCTCTACTTCGTGCTCTGACCCGCTTTTCCTCCGCTGTTTTCTTTGTCTCAGAGAAGCAGCACTTCG	GGAGAAGAGCACGGAGGCCCTCACGAAGCTCTCTAATTGGAGATCTCGAAGCCCAGGCGCCCAGATCTCCTCTGAAGGTACGATCTCCCCCTCGTCCTGGGCATTCTCACTGCCCTCTCTGGTTGAATGGTCTTTCTTTTGTGGTGTTACCGGGGAGCATTCTTTTATCTCGGCTTATTTCTAGCTTTGAGGGGGGATTT	CGCTTTTCCTCCGCTGTTTT	59.689	20	100	100	CAACCAGAGAGGGCAGTGAG	60.037	20	100	100	185	354	538	CGCTTTTCCTCCGCTGTTTT	59.689	20	100	100	ACCAGAGAGGGCAGTGAGAA	60.179	20	100	100	183	354	536	CGCTTTTCCTCCGCTGTTTT	59.689	20	100	100	AACCAGAGAGGGCAGTGAGA	60.179	20	100
nSSR_2024	TC	7|C6004250:262-675|+	N/A	N/A	11|C5232312:517-538|+	7|C6044253:341-354|-	N/A	8|C7047798:332-347|-	8|C5682213:560-575|+	1.47	0.38	0.99	ACAGGATGTGGCTGCAGCTCATCCTGCTTGGGCGCCGGCGCCGCCCCTCCACCTCCAGCCATTATCCTTCTCTAGCTTCTCTCTATATCAGTACACTATAAGCAAAGTAAAAACTCAGAGCAGAGCAGAGCAGAAGGCAAGAAAGCAAAGGAAAGGGAATCTACAAGACTGCACTACTCCTTCCCAACTTTTTCATCTTT	TACTCACTTTTCCTCCCTTTTCTAAAGACTAGAAAAGCTATATATGCCCCCCTCCCCAAGAATTCATCATCAAAATTTACAATAAACAATAATGAGAATAATTGAAAGAATTGGATTCAAAGAAATGCAGACCAATGGCAATACCAACTGTTTTTCTTTTTTAGCTTCACTTGTACTCTTTCTAAGCAATGAGAGAGCAA	AGACTGCACTACTCCTTCCCA	60.203	21	100	100	TGGTATTGCCATTGGTCTGCA	60.272	21	100	100	195	365	559	GACTGCACTACTCCTTCCCA	58.733	20	100	100	TGGTATTGCCATTGGTCTGCA	60.272	21	100	100	194	366	559	ACTGCACTACTCCTTCCCAAC	59.652	21	100	100	TGGTATTGCCATTGGTCTGCA	60.272	21	100
nSSR_2025	TC	7|C6005676:310-723|+	8|C6141751:338-353|-	7|C5080145:189-202|-	N/A	N/A	7|C6298022:756-769|-	7|C7061310:387-400|+	N/A	0.4	0.38	0.98	GGGGAGCTGAATTTATCTCGAACATGCACAAGCTGGAACCAAAATATTCCTGTACAACTATCGCGACAATATGCAGTTTAATGGCATCATCCGGATTATGCAATGTAGAATAAAAGAATGTCACACTTTAGCTTGAATGTTGAATGTGAAAGTTTTGTTTGGAATAATAAAGTTTCATCAGGGGTTGAAATATATTTAGT	AACAATCGAAGCATGCTTCAGAGATAACTCCAATTTTTTGGTATCATTACCTTCCATTCATACAGATAATGTCATCATAGATCTTAGCCTAATTTGGACTGGATCATGTTTGATGATGTGAAAAACAAAAATTAGAAAAGAAAATATAGCTTGTGAAATGTACAAGATGATTAAGTTATGAACCAGAATGTACTCTGATT	TGGCATCATCCGGATTATGCA	59.926	21	100	100	TGGAGTTATCTCTGAAGCATGCT	59.546	23	98.92	100	165	281	445	TGGCATCATCCGGATTATGCA	59.926	21	100	100	TGGAGTTATCTCTGAAGCATGC	58.198	22	98.88	100	165	281	445	TGGCATCATCCGGATTATGCA	59.926	21	100	100	GGAGTTATCTCTGAAGCATGCT	57.929	22	98.88
nSSR_2026	TC	7|C6008824:176-589|+	7|C6236493:1731-1744|-	N/A	6|C5360462:277-288|-	7|C5650601:269-282|-	N/A	7|C7012588:561-574|+	7|C5596279:516-529|+	0.37	0.25	0.99	CCCGATCGGGTGGTGTTGATGATTGGTTCAGTGAAAGTTGAACTTAATAAATTAGTATTAAAATATTGCAAGAGAGGACGTGGACACAGCCAGCCAACCTTCTCCTCTATATTCACGCCTATTTTATTTCAAAAGGTAACTGTGCACAAACTATAAATACGAGTCATAAATGTGCTGGGTTGTGCATGCTCCTCAGCGTG	TTTCCTTCTCTACAAATACAACCCTCAGGGTTCCTTGCATTGCACCCAGCCATTGAGAGCAAGAGAGAAAAAACAGAGAGTTGATCTAAGTACTCATCAAGAAGAAGGTAACTCTAATCTTCTTCATCTTCAACTTTCAAGTGTTCTTCTATATTTTGAGGTTCTTTCTTCAGTTATCTGATCTTTGTTTTAGTAATACT	TTGCAAGAGAGGACGTGGAC	59.966	20	100	100	CTGGGTGCAATGCAAGGAAC	60.038	20	100	100	198	240	437	TTGCAAGAGAGGACGTGGAC	59.966	20	100	100	TGCAATGCAAGGAACCCTGA	60.179	20	100	100	193	240	432	AATGTGCTGGGTTGTGCATG	59.681	20	100	100	TCTCAATGGCTGGGTGCAAT	59.96	20	100
nSSR_203	AAT	7|C6099280:190-610|+	6|C6190285:905-922|-	7|C5091317:241-261|+	N/A	7|C6064003:389-409|+	N/A	6|C7066060:332-349|+	N/A	0.49	0.38	0.99	CTTAATCTTATGTACTTATTTTCTATTATATTTAAATTAATTAATTTTCATTTAACAAATTTTATCCTAAGATTACATATTTGACATTGATTTTTAAATCTAAAATCTTATATTTTATTTATATTAGATAAATCTTAATTTTTAATTTCAAGTAACAATAAAGTGCTGAAAAATAACCAAAGTATAAATTGCATCTTCAA	CGCATGTGATTAAATAAAGGAAGTAAATAAGTTTCATATATTATTTAGTATGACATGGGTAAAAGTGGAAAGATAGGTGGCGGTCATCCATCCATCTGCGTGGAATAACCTTTGGATAACTTCTACTCAGATTCAAACCTAATTCTACACGGATCCAGGCCCGATTCTGTTCGGATCCGAAACTACTCCATTCAGATCCT	Primers not available
nSSR_2031	TC	7|C6096068:189-602|+	6|C6106269:596-607|+	6|C5339913:2458-2469|-	N/A	7|C6048199:621-634|-	7|C6398558:2206-2219|+	8|C7093088:321-336|-	8|C5684809:589-604|-	0.76	0.12	0.99	CAAGTTCAAGAAGGTGATTAAGTCTGAAGGTGGAGAAGTTAAGATGGTGTCTGGATATAGGTGGAAGGGAGATCTTAATCCAATGCACATTGGTTTCGTCTCCATGGAACCTAACACACTCTTCATCCCTCAGTACATTGATGCCAACCTCATCCTCTTCATTCAAACAGGTTTGGTGTGGGACTTTCTCTCAGTCTCTT	TATATATAGATCTATCACTGTTTCAGAATTGAGTTAATTAATTGCCCATGAATAGGAGAGGTGAAGGTAGGGTGGATCCACAAAGAAAAGTTGGTCGAAAAGAAGCTCAAGATGGGTGATGTCAATGTCATACCGGCGGGGTCGGCATTCTACTTTATCAATGTAGGGAACAATAAGAAATTGCGCATGATTTGTAGCAT	ACAGGTTTGGTGTGGGACTT	59.371	20	95.83	100	CCGCCGGTATGACATTGACA	60.461	20	100	100	187	354	540	AACAGGTTTGGTGTGGGACT	59.371	20	95.83	100	CCGCCGGTATGACATTGACA	60.461	20	100	100	188	353	540	ACAGGTTTGGTGTGGGACTT	59.371	20	95.83	100	TCCACCCTACCTTCACCTCT	59.209	20	100
nSSR_2034	TC	7|C6149743:356-769|+	7|C5840837:288-301|-	4|C5035105:307-314|+	N/A	8|C6011839:788-803|-	N/A	7|C7107664:1101-1114|-	6|C5651345:471-482|+	1.26	0.25	0.99	GCGGATCGCGATCCTCGTTCTTACAATGAACTTAATCTAGACCGTTCATTCTTTCACAATCCAACGATCGAAATTCCCCCGCGCTTGCGATTTCAAACCTCAACCCCGATCTCAGTCACCTATAAATAAACCCCAGTTCTCCTCTTCTTCTTTTCATCGCTAGAACCTCTTCCTCTTCTCTTGAAACCCTAATCTTCGTT	GATGGCGAGGACCAAGCAAACAGCACGCAAGTCCACCGGCGGGAAGGCCCCAAGGAAGCAGCTGGCGACGAAGGCGGCCAGGAAATCGGCTCCGGCCACTGGCGGTGTGAAGAAGCCCCATCGCTTCCGTCCCGGGACGGTGGCTCTGAGAGAAATCAGGAAGTACCAGAAGAGCACGGAGTTGCTTATCAGGAAACTCC	CAACCCCGATCTCAGTCACC	60.108	20	98.75	100	GACTTGCGTGCTGTTTGCTT	60.249	20	100	100	147	300	446	CAACCCCGATCTCAGTCACC	60.108	20	98.75	100	GTGCTGTTTGCTTGGTCCTC	59.688	20	100	100	140	300	439	AACCCCGATCTCAGTCACCT	60.252	20	98.75	100	GACTTGCGTGCTGTTTGCTT	60.249	20	100
nSSR_2036	TC	7|C6157079:336-749|+	7|C6213475:969-982|-	7|C5312580:589-602|+	N/A	7|C5995737:847-860|-	N/A	N/A	10|C5668911:706-725|-	1.2	0.38	0.99	AAAAAATAAAAAATTAAAAAAAACAATAATATATAAAATAATCACAATAAAATTATTATTAAAATATTTTTTAAAAAGAAAATACATTCGTAAAATAGACAGGAATTATGGTCACATCATAGCCCTCCATTCCGAGCATCTCAGACAAATTCTCAAACTGAAACCGACCCCCCAATCTCCACTCCCTCCACTCCACTCCT	ACCAAATGATCGAAGATCCCGCTTTCGGTGCCGGAGATCCCTACGACGGAGCTCCGCGATCGAGTTCCTCGTCACCGGAGATGCGATTCGATGGTCTCGGCGACGGAAATGGTGCCCCTTCGGTGGAGGACTCGTCGAGGAGCGAAGTCCAGCTTGATCCTAAGGTTCCCTCTGGTTCTGGGGTTGGAGGGGCGAGGTAC	ATCTCCACTCCCTCCACTCC	60.032	20	100	95	GGATCAAGCTGGACTTCGCT	60.108	20	100	100	200	374	573	CTCCCTCCACTCCACTCCTT	60.252	20	100	100	GGATCAAGCTGGACTTCGCT	60.108	20	100	100	193	381	573	CTCCCTCCACTCCACTCCTT	60.252	20	100	100	AGGATCAAGCTGGACTTCGC	60.108	20	100
nSSR_2037	TC	7|C6168635:789-1202|+	5|C6213037:1217-1226|-	N/A	4|C5355196:236-243|-	4|C6079381:2250-2257|+	6|C6127042:314-325|-	6|C6883820:234-245|-	N/A	1.11	0.25	0.99	TTGTGGAGAAGGGGAAATAGATGGTGAGAGAGTGTAGGGTTGCTTAGGTAAAGGGTGAAGTCTATTTCACTATTCCTTGTAGCACTGTGTTCCTTCTTTGAAGGCCAATCATGGGGCCCCATATCTTCTTAGGTACTATGTCATTGTCCACCTTTCACACTTCTACCTCAAGCTCTTCTTCTTCCTTCAATTTTTAACCA	TATTTATTTCAAATTTTAATTTTTGTTTCATTTTCTTATGATTGTTTCAATTTTCAAAGCAAGGATATTTAGTTTTCTCATGATTCCGACTAGTTTGATTTTTATTGATTTGATTTGTGTTATGAGATTTCGGTTTCGGTTCTAGATGAATTTATTTAAAATTTATTTAAAATTTCAATTTATATGTTTTAGACCATTTG	ACCTCAAGCTCTTCTTCTTCCT	58.753	22	100	100	AGAACCGAAACCGAAATCTCA	57.604	21	99.04	100	193	364	556	ACCTCAAGCTCTTCTTCTTCCTT	59.35	23	100	100	AGAACCGAAACCGAAATCTCA	57.604	21	99.04	100	193	364	556	ACCTCAAGCTCTTCTTCTTCC	57.306	21	100	100	AGAACCGAAACCGAAATCTCA	57.604	21	99.04
nSSR_2039	TC	7|C6176384:562-975|+	4|C6035880:395-402|+	9|C5325742:1403-1420|-	N/A	4|C6024189:306-313|+	7|C6381246:355-368|+	N/A	N/A	1.94	0.38	0.98	CAGAATCCTATTAACCTTTCAAGCATCAAAAACTAAGCCAGTTCGCTGGAGAAACTTAGAAATTAAAACTTAACACGGCGATGTCTCAGCGACGATGGCAGACGACTGCACGTAGGCAGTCTGTGGCCTCTGTCGCGACGCTCCGGGCGGGTACTCCAACGATGGTAGATCAAAGCTTTCAATAGCGCCCCCTCTCTCTT	TAGATCTCTTTTCTCACTAGGGATGACGGCTAGGGTTCGGGGAATACGATGATCTTTATAAGAGTTCGTGGGGGATAAGGATTATGATTTAATTAACTCATATTTCAAATCATGACCGTCAAACTCAAACTGAAAAATTCTCGTGCATGGTCGTATGAGAGGATTTCCACCTTTTGCAAAGAAGCCCTTGTATTCTTCTG	TAACACGGCGATGTCTCAGC	60.458	20	98.75	100	CGTATTCCCCGAACCCTAGC	59.967	20	100	100	192	270	461	TAACACGGCGATGTCTCAGC	60.458	20	98.75	100	CCCTAGCCGTCATCCCTAGT	60.179	20	100	100	179	270	448	TAACACGGCGATGTCTCAGC	60.458	20	98.75	100	ACCCTAGCCGTCATCCCTAG	60.179	20	100
nSSR_2040	TC	7|C6182960:210-623|+	N/A	N/A	N/A	5|C6080441:658-667|-	5|C6070518:284-293|-	6|C7022484:288-299|-	5|C5663419:611-620|+	0.8	0.38	0.99	CTGTGTGATTAATGATTATAGAACATGCTTTCTGTGCGGTTGGATTCGATAACATACAGCTTTATAGTACAGATATTCAAGTGCACACTGCAAGCTGATGCATCTATGGACAGTCAAATTCTTCTCACTGAACTGTCAAAATGATTTTCTATACAGTTGAATATGGAAAATTTTGGTTGTTTCGATTCCAAATGGTACTG	CGTCTCAAAATATTTGGCATATGGAAACTGTTCACGAGGAGTTAAACTGTTGTTTCCAGATTCCTGAAAGCACAAAATGGTCATGTCCCACCTAAAGATATTTTACTTGGAAGTGTTCGTTTGTGCCTTCACTGAGGCAGGACTGTATCTAATATTTGACAAGGTGCAGAGAAAATTTAGAACCTTTTCAAGGGGTAACC	GCACACTGCAAGCTGATGC	60.444	19	100	98.68	ACTCCTCGTGAACAGTTTCCA	59.239	21	100	85.71	174	282	455	GCACACTGCAAGCTGATGC	60.444	19	100	98.68	AACTCCTCGTGAACAGTTTCCA	59.83	22	100	81.82	175	282	456	GCACACTGCAAGCTGATGC	60.444	19	100	98.68	ACTCCTCGTGAACAGTTTCCAT	59.631	22	100
nSSR_2044	TC	7|C6208788:1612-2025|+	8|C6007764:321-336|-	7|C5291000:890-903|-	N/A	8|C5748071:353-368|+	8|C6181668:387-402|+	9|C7115456:1209-1226|-	N/A	0.69	0.25	1	AGGGAGAAATGGCAGCAAGAGAATCATGTCTTGTTTTGTGTGGGAGCTCATCCTGAGGTTGAGACCTTGCCTACTTCCAACTCTCTCTTTCAATCTCCTGCTTCAATAATGGCCTCTTTCCTCCGGTCCAGCTCAAGGGCCCCTCCTCTCCCTGTCCTCTTCCTCCTGGTAAAACTAAAACCCCCTCTTCTTTTACTTCT	TTTCTATTGTCTTTGTTGTAAAACATTTTAAGCATTCATTTCTCCTGCATTGTTCTTTCTGCCTTTAGAACCACCCACCCTGAGAGAGAGCACAAGCACTCAATTGTTGTTCTGGGCTTGAGTATCTCTGTTTCTGTGTGCCTTTTTTGAGTCATCACTTCTTGTTTGTTTTCAGGAGGTGAGTTGTTATTTGGTCCTTG	TCCCTGTCCTCTTCCTCCTG	59.958	20	100	92	GGTGGGTGGTTCTAAAGGCA	59.888	20	100	100	145	348	492	CCTGTCCTCTTCCTCCTGGT	60.252	20	100	84	GGTGGGTGGTTCTAAAGGCA	59.888	20	100	100	143	350	492	TCCTCTCCCTGTCCTCTTCC	59.663	20	100	100	GGTGGGTGGTTCTAAAGGCA	59.888	20	100
nSSR_2048	TC	7|C6221248:2491-2904|+	N/A	7|C5070773:298-311|-	7|C5356792:994-1007|+	6|C6003349:304-315|+	8|C6400100:1727-1742|+	N/A	7|C5602889:368-381|-	0.58	0.25	0.99	AATTTTAGGATGTTGATCAGAGAGTACTCACGAGGTCTTTGAAAATGATGAAAGCGAGGAGGAAGAAGAGGACGAAGAGGATCTCGAACTCGGCCAGCCGCACGAACGCAAATACAGAGTCCACCGCCCTCGTTAGCAGTGGCTGCCGCCTCTCTGGAGCTCTGCCGCCGCGCCTAATCATCGCCGCCGTTCTGTTCGGA	TTCGGACGCAAGGGTTTGGATCCCCAGAATCGGGAATAACCGTGGTATTCCACCGAATGTTTGCGTTCGTGCCCCTGTAAAACTTCATAATTTTATATGCAAGTAAATATATGTTTACCTTAAATTAAATGTATATATACACTAATTTTTGTTATTCAATGTATTATTTAAAAAAATAAAAAAAATGATTTAAATGTTTT	CGCACGAACGCAAATACAGA	59.563	20	100	100	GTTTTACAGGGGCACGAACG	59.764	20	100	100	199	298	496	CCGCACGAACGCAAATACAG	60.518	20	100	100	GTTTTACAGGGGCACGAACG	59.764	20	100	100	200	297	496	CTAATCATCGCCGCCGTTCT	60.598	20	100	100	GTTTTACAGGGGCACGAACG	59.764	20	100
nSSR_205	AAT	7|C6141735:503-923|+	6|C5991724:394-411|+	6|C5264478:493-510|-	N/A	6|C5927951:375-392|+	7|C6311472:487-507|-	N/A	N/A	0.49	0.38	1	ATTAATGATTCTGCACCTTCATCAGCGGGGAACAACAGCTGAATGAACTCAAACAGTGGTGCATTGGTTTAGTTTGTACCTGTTACATTGTAGCAGTATGATATTGTAATTTGAACACTGATTGCAGTTAGATATCAATTCAGTAATCTGCATGTTGTTTTTTAACACAAAACACACTCTCAATCAAACTCTTAAGGCAA	AAATAAATTTTAAAAAATCCTAATCAACATTTCAGAGTTGAATTACAAAATATGCACACAAATTCTCTTGGATTGTCAATAGTACAGCATGGGGCTACCACTCAGCTGGATTTTTCAGGACTTGTGTATAGCCAACGGCCTGGTTGTGTGGCAACCACAAGATTCTGAATTCATCCATGTCAGCTAAAATCTAGTGGTGT	CACTCTCAATCAAACTCTTAAGGC	57.824	24	100	100	AATCCAGCTGAGTGGTAGCC	59.456	20	100	100	159	374	532	CACTCTCAATCAAACTCTTAAGGC	57.824	24	100	100	AAATCCAGCTGAGTGGTAGCC	60.065	21	100	100	160	374	533	CTCTCAATCAAACTCTTAAGGC	54.845	22	100	100	AATCCAGCTGAGTGGTAGCC	59.456	20	100
nSSR_2050	TC	7|C6222210:3416-3829|+	7|C6127479:187-200|-	7|C5190461:507-520|-	6|C5358036:319-330|-	7|C5964209:746-759|-	6|C6300648:322-333|-	N/A	6|C5373371:217-228|+	0.49	0.12	0.97	CCTTTGCAGGGTCGACTTTGGGGAAGCTCTTGATGACGTCGAGAACCCGATCCACTACCTCCGCCCGATCCAGGTGGTCGTCACCATGGCCTGACATCGACCGGATGGAGCCGAGCCATGAGGGGAGAACATGCCGGCCAAGAGGCTGGACGGGGATTCTGATGTGCCGGAGGATCGCCGGTCTCAACGACGCCGCCATT	GGCGAGGAAAAGGAACTGGGAATTGATGAGACGGTTATCACCCTCTGATCCTGTAATCAGATTCCTGAGATCTTTGGACGGCTGAGATTAAGGAGAAGGACTGCGCTGGGCAGCTGGGCTTTTGTAATGAGGAGCCGGGCTTTAGCCTTTAGGCATTTTATAATTATCCATTTTATGGATTTTTAAGGAATTTCAGATCA	CCATGAGGGGAGAACATGCC	60.467	20	100	100	GCCGTCCAAAGATCTCAGGA	59.463	20	99.17	100	181	315	495	CCATGAGGGGAGAACATGCC	60.467	20	100	100	AGCCGTCCAAAGATCTCAGG	59.461	20	99.17	100	182	315	496	GCTGGACGGGGATTCTGATG	60.534	20	97.5	100	CAGCGCAGTCCTTCTCCTTA	59.467	20	100
nSSR_2054	TC	8|C6051974:9-424|+	N/A	9|C5331278:979-996|-	7|C5218876:450-463|+	7|C5991133:824-837|-	N/A	N/A	7|C5739617:467-480|+	0.8	0.38	1	ATGATAAGCATAAAATATCTCGCTTGTTATCCCTTGTTTTCCCTATTAAACTTGCTATTTAATTGTGTACTTAATATTTAAGTTTGATGGTGCAAGGTATTGCTATAGCATTGTTGCTTTTGTTGGCATTTCCTCATGTTGAAGAATACTGATTGGCCACCGACCTGGATCTAAAATCCTCAATTCTGTTTAAGTTTTAG	TTAAAATGGTATCTGTTCAAATTTCTGTCTCTTTTGTAGCCTATGTTGGATGTCCCGATATATGGAAGAATTGCAACTCTTGAACTTTTTCGCCCGCACGTGAGTATAGTTTTGTTTTTTTCCTTTGTGTTTCATGGATTATTCTTTGTGCTTTGACTTTTCTTTCTTGTCTCATTGTAGGGTGAAGCTCAAGATTTCCT	GCCACCGACCTGGATCTAAA	59.46	20	100	100	TCGGGACATCCAACATAGGC	59.532	20	100	100	119	163	281	GCCACCGACCTGGATCTAAA	59.46	20	100	100	CGGGACATCCAACATAGGCT	59.53	20	100	100	118	163	280	TACTGATTGGCCACCGACCT	60.908	20	100	100	TCGGGACATCCAACATAGGC	59.532	20	100
nSSR_2055	TC	8|C6068148:55-470|+	8|C5999180:406-421|-	N/A	7|C5240618:219-232|-	N/A	4|C6273910:269-276|+	8|C6970550:470-485|+	N/A	1.55	0.38	0.99	TCTTTATATTATCGAGATCCGCTATTTTTCTTTCTCGTATTTTCTATCCGTCGGCTTATTGGATTCGGGTCGTTACCCGGAAAGTGCAAATCCCTATAAAATCCTTATCGGATCTTTGATCAGACGAAAAACGATCCGCTCTCCCACTATAGAATCCTTATCGGATCTTTGATTAGACGAATAACGATCCGCTCTTCCAT	GTTCGTCCTCGTGGACGATCTCTTCCTTCGCCCTCGAATCCTACTGATTTTCTAGGGTTTAGAATGGGGAAGCAGAAGGGAGAGGGCGCCAGGAGCAAGAATCGCCCATCTAGCAGCAGGTTCTTCTTCAGTTCTTCGTTGATTTTGTGTTCTTTTCACTATGATTTTGGTCTTTTTTGCGCTGCCATACAAAGGATTTG	TCGTTACCCGGAAAGTGCAA	59.894	20	100	100	GAGGGCGAAGGAAGAGATCG	59.969	20	100	100	182	123	304	TCGTTACCCGGAAAGTGCAA	59.894	20	100	100	CGAGGGCGAAGGAAGAGATC	59.969	20	98.75	100	183	123	305	ACGATCCGCTCTCCCACTAT	60.179	20	100	98.75	GAGGGCGAAGGAAGAGATCG	59.969	20	100
nSSR_2057	TC	8|C6115208:510-925|+	11|C6186349:235-256|-	N/A	N/A	14|C5997199:694-721|+	11|C6168090:228-249|-	9|C7068220:231-248|-	N/A	2.06	0.38	0.99	CTTCTCATCTTCTTGATCTCCTTGGTAATGGTGGTGAGAAGCTCGACTGGCGATGATAACAAGCTCTTGACCGCGTCGAAGCTGGAGATGTTCGTCGACGATCTGCCGATGATGCCTAAAGTCCGGGGATTCGCCGTCAAAGACGGCGCCATCGTCCCCGGTAACCTCACCATCGGCATGTTCCCCAAGCTCTGGGTCAG	CTCTTTTCCGATGAGCTTACTACTCGTGTTCCGATCCATCGATAAGATTAATTTAATCTTTCTTTTTGATTTCGATGCTAAATCAATCCCAGGAAATTTCTCGATTAGGCATTAATCTCGTTACCGAACGGCGGATTTTGGGAGCTTTTTAGCGTTGAATCTTTAGATTTTTGTGACAGAATCGATCCCAACCAATTAAA	AACCTCACCATCGGCATGTT	59.962	20	100	100	CTCCCAAAATCCGCCGTTC	59.199	19	98.23	100	198	362	559	AACCTCACCATCGGCATGTT	59.962	20	100	100	CTCCCAAAATCCGCCGTTCG	61.978	20	98.33	100	198	362	559	AACCTCACCATCGGCATGTT	59.962	20	100	100	TCCCAAAATCCGCCGTTCG	61.036	19	98.23
nSSR_2062	TC	8|C6174698:314-729|+	9|C6213539:1326-1343|+	8|C5322036:562-577|+	N/A	9|C6031199:921-938|-	8|C6364464:223-238|-	N/A	N/A	0.49	0.38	0.98	TTTGAACTTTTATTGGAATACAAGTTATTAATTACTCTTTAAAATAATTAGGTGACTAATTAGCTGATTAAAGAGGTCTCCTAAACTTTGTGGTATGGAAAGAAGGATTAAAATGGTTAATCCCATGATTAAGGTTAATTGGGGTCATCAAGGACCTAATTCTAATTTCAGGAAAAGTCAAGGACTAAACAGGAATTGTG	AGAGGGAGGGACTTGCATGTAAGTTATTTAAAGGGGGGGACTTATTTGCAAAACCACATGGGAACCATGCAGAGGATATGCGTGAACGATCAAGATTAAAAGATCTCATGATATTGTGTAAGCTCGAGGTATGAATAGTGATCTTGGCCCTCCATGCATCCATTCGTATGGGATGAAATAATCCACGCCGTCGATCTCAA	AGGTTAATTGGGGTCATCAAGGA	59.404	23	100	100	GGTTCCCATGTGGTTTTGCA	59.244	20	95	100	151	331	481	AGGTTAATTGGGGTCATCAAGGA	59.404	23	100	100	TGGTTCCCATGTGGTTTTGC	59.244	20	N/A	N/A	152	331	482	AGGTTAATTGGGGTCATCAAGGA	59.404	23	100	100	ACGCATATCCTCTGCATGGT	59.239	20	100
nSSR_2066	TC	8|C6195180:751-1166|+	8|C5980146:309-324|+	8|C5193773:527-542|-	N/A	8|C5812097:201-216|+	3|C6401862:3329-3334|+	9|C7118204:1079-1096|-	N/A	1.97	0.25	0.99	ACTTTGCCATTTATTTATCTACTCTTTTTCTGTGTAGTAGGTTGCTGGCATCTGTTTATGGTGTAATCTCATTATCAAGCTCTACATCAGTATGCCTTTCCTTGACCGAAAAACTTAGTATGGTTAGAGCTCTACATCAGTATCCACAAGGTATAATGTCACCATCCTATTGGTTTTTTGTTATCTGTTGAGATTTTAAT	AACTCTTAACAAACAACTACTGGAATGGTGAGGTGTTGTCACCCAAGTGTCTGTTCAATAATGTCTGCCAACTTTAATTACTTGATTAATTTTAGCAAGAATGAGTCATAGAATAATACCCAATCAATGACTTAACTTTAGTTTGATTGAGGCTAAGTTGGATGGCAGTCATTTAATGCTAGGACATCCTATATTGAACC	AGTATGCCTTTCCTTGACCGA	59.093	21	100	100	ACAGACACTTGGGTGACAACA	59.719	21	100	100	182	288	469	TGCCTTTCCTTGACCGAAAA	57.94	20	99	100	ACAGACACTTGGGTGACAACA	59.719	21	100	100	178	292	469	AGTATGCCTTTCCTTGACCGA	59.093	21	100	100	TGACAACACCTCACCATTCCA	59.507	21	99.04
nSSR_2068	TC	8|C6216642:2058-2473|+	N/A	8|C5259638:295-310|-	N/A	8|C6057843:1427-1442|+	N/A	7|C6997476:375-388|-	8|C5664185:678-693|-	0.4	0.38	1	AGCAACCTCAAAGCACTAAACTGGCACTCACCAGACTTGGTTATCAAAGAAGACTTAGACTTCTCAACTTCTGAAAGCCACCATTAATGCTGTCCAGAATGGTGAACAATCCTTTAGATAGAAGCAGAAGAGAGATTTCAACTTCCATGTTTGGAGCACTTATATAGGATGAGACTATGACATCCACTAGTCTGTCTTTA	TTTGGAAAACTAAACAGCATGAAATCCAAAAAAGAAAAAGAAAAAATTAATGATTTAACAGTTGTGACAAAATTACTGAGCACATGGACTGCTCACATGTAGACAAGATGAAGAATTCAATCAAACACTTCCACATGGTGAAACAAAAATGCAGAGTCTTTTTATGATGCAATGCTAACTGATCCAGAGCCAAGGACAAA	GCAGAAGAGAGATTTCAACTTCCA	59	24	100	100	CATGTGAGCAGTCCATGTGC	59.549	20	100	100	192	323	514	TGACATCCACTAGTCTGTCT	54.909	20	100	100	CATGTGAGCAGTCCATGTGC	59.549	20	100	100	138	377	514	AGCAGAAGAGAGATTTCAACTTCC	58.755	24	100	100	CATGTGAGCAGTCCATGTGC	59.549	20	100
nSSR_2069	TC	8|C6217702:2052-2467|+	9|C6187469:266-283|+	8|C5219757:268-283|+	9|C5301024:463-480|+	N/A	N/A	9|C6952100:270-287|+	7|C5574477:248-261|+	0.75	0.25	0.99	AGACCAAAGAGAAGGAGCACTAATGCTGAGGAATCGATGGAACTGAAGAAGAAGAAGATGCATACGAGTTCTTTTGCTGAGAAACAATCTCAACTTATCAACATAAAGAAAGAAATTCAATTTAGTAAAACAATAAGCAAAAGCAACGTTGTTCGTTCTTATCTGGTAAGCATTGCATCTACACATTAATTCAATTCCTA	TAAATGATTGTCAGAACATTTTCTGATCTTCAATATTGCAGAATGTTCCTGTTTCATTCTGTGCATCAAATGGCTTCTCAACAACTCAGGAAGTGATTCTGAGAGATTCAAAAGGGAAGGCATTCCCAGTAAACCTTTCTTCTCCTGGATATTCACCGAGATTCAGCAAAGGATGGAGAGTGTTCTCTGCAGAGAAAAAC	AGCAAAAGCAACGTTGTTCG	58.455	20	99	100	TCCTGAGTTGTTGAGAAGCCA	59.232	21	100	100	172	335	506	AAGCAAAAGCAACGTTGTTCG	59.083	21	99.04	100	TCCTGAGTTGTTGAGAAGCCA	59.232	21	100	100	173	334	506	AGCAAAAGCAACGTTGTTCG	58.455	20	99	100	TTCCTGAGTTGTTGAGAAGCCA	59.827	22	100
nSSR_207	AAT	7|C6188530:444-864|+	N/A	7|C5262438:665-685|+	N/A	7|C5953091:664-684|+	8|C6245908:522-545|+	N/A	7|C5730257:814-834|+	0.4	0.38	0.99	ATGGTATAGAACTTTACCCTCCTACATGTTTCTCTATGATCTGCCAGGAGCTCATCGTACTTTAATTGCAAATCTGACTTCTCCGCCTGAAGTTTTTCATATTCAGAGATTGATGGACCACCTAATTTTTGTTGGATGAACCTGAAAATGAAACCAGATTCCTTTCCTTCTTCAATGCACTTAAAAACTTCAAAACAATA	CCATATCAATTTATGAAATTTCTTAGAAAAGATAAGGACAAAGCCAAGCACTTCTCCATAATTAATGGCCAATGCTATCATTTTGTGCAATGCATGATTCAGACAAAAAAGCAAGATGCATTGACTGACAGATATTCCAGGTCAACAACAAGTATTTGAGAATAGCAAGTTGTGATATCAAACATCATTTATGAATGAAC	TCAGAGATTGATGGACCACCT	58.162	21	100	96.43	AGAAGTGCTTGGCTTTGTCCT	60.134	21	100	92.86	174	302	475	TCTGACTTCTCCGCCTGAAG	59.109	20	100	95	GTGCTTGGCTTTGTCCTTATCT	58.915	22	100	97.73	200	272	471	TCAGAGATTGATGGACCACCT	58.162	21	100	96.43	GAGAAGTGCTTGGCTTTGTCC	59.732	21	100
nSSR_2070	TC	8|C6220442:332-747|+	8|C6237207:1341-1356|+	N/A	8|C5283274:655-670|-	N/A	N/A	9|C7109944:580-597|+	9|C5666903:331-348|-	0.49	0.38	0.99	ACAACATAGAAATCAACATCGAATTAATGCATAATCCAAGGGTTCATCATACCCAAGTATCTACAAAATTAGTTCACCATAAATGGAGAACAATAATACAAAACAAAGGGATTACAAACCAACGAAACCATGATGAGAAATATTATTTCATACACTATTGGCAGCTCAATTGTCTTGATCTCTAACGCGATGTCCTTACT	CAAGATTAGGAGGTGCTGCTCCTAATCCCTAATCCATAATTAATTTCTCTCCAAGAAAGTTCTCCTCCCCCAAAACCCTAATCATTTGTATTTATACCTCCACATAGGGTTTTAGGAGTGCCATTTACATTTCAACCCCTGCCTGGGTCCGCAGTGTAAGGGAGGGTTACGCCATACAGACTCGTATACGGGTCATACGC	TGATCTCTAACGCGATGTCCT	58.701	21	N/A	N/A	CCAGGCAGGGGTTGAAATGT	60.543	20	100	100	187	375	561	TGATCTCTAACGCGATGTCCTT	59.312	22	95.5	100	CCAGGCAGGGGTTGAAATGT	60.543	20	100	100	187	375	561	TTGATCTCTAACGCGATGTCCT	59.312	22	93.2	100	CCAGGCAGGGGTTGAAATGT	60.543	20	100
nSSR_2071	TC	8|C6221768:669-1084|+	8|C6130507:659-674|+	N/A	8|C5347812:308-323|-	N/A	10|C6401582:2107-2126|-	10|C7137502:1307-1326|+	N/A	0.98	0.38	0.98	AGAACCCACAAAAGCTAGAACTTGCTTTGTTTATTCTCTCACTTCACTACAATCAATCACTACCACAATTCACAGTTCTCAGCTTCACACCATCCTCCTCAGTTTGCCATCCCACTCTTAAATCTTAATGCTGTTGTCTTCTTCGGACCTGCTGTTCATTCATCTTCGGGAAGCTGAGCTCGTCTCTTCCTCTGTTTCTT	TATCTTTCTCTCTTCTATGGCTTTTTGGGAGCTCTTGGACAGCATTGGCATCAAAGGAAACCCTTCCCTGAGAGTAATGCAGAAAGCTGGGAGGGGAATGTCCGACCTGGCATCGTCCTCCTCTAATGGACCCGTTATCTGCTCCGGATTCGAGGTCAGTCACCTGCCATGCAAGTTTCAATGTTTCTTGCTGTTAATTA	CCTCAGTTTGCCATCCCACT	59.961	20	N/A	N/A	GCTGTCCAAGAGCTCCCAAA	60.251	20	100	100	163	296	458	GCTGAGCTCGTCTCTTCCTC	59.899	20	95	100	CCCTCCCAGCTTTCTGCATT	60.324	20	100	97.5	139	372	510	TCATCTTCGGGAAGCTGAGC	59.823	20	100	90	GCTGTCCAAGAGCTCCCAAA	60.251	20	100
nSSR_2074	TC	9|C5934483:24-441|+	N/A	9|C5040335:320-337|+	N/A	N/A	9|C6228418:320-337|+	6|C7080960:877-888|+	6|C5632867:504-515|+	1.47	0.38	0.97	ACGAAACGAAACCGAGGCTGAAAAGATAAAAATTTAAAAGCCAATGAAAAGGAAACTTGGTAACATTTTTCTAATTATTGGCTCCATTAAGGTCCAAGGATTAGACTATAAGAGCAGAGAGGGGACCAAACCAAACCCACTGGTCAATTTTAATCCTGATTAGAAAATTCCCTCATGCTTTGCTAAAAAGAAAGACCTCA	AGTCTAAAGTTTATCTCTTTCTCTCTATGGATGGAAATAAGAAAGAAAGAAGGGCAGCAACAGCATGAGCATTCCCTACATCTCTTCCTTCCTTTTTCCTCTGATCTTTCAATAATGTGGCTTCCCATGAAAATGAACTCTTCTAACCCTTCTCCTTCAATGAAGTTGATCACTTCCTTTCTTTTTTTCTGCAAGTGGGT	GGGACCAAACCAAACCCACT	60.398	20	100	100	GCTGTTGCTGCCCTTCTTTC	60.039	20	100	100	161	144	304	GGGACCAAACCAAACCCACT	60.398	20	100	100	GGGAATGCTCATGCTGTTGC	60.179	20	100	100	173	144	316	CCAAACCAAACCCACTGGTC	59.25	20	100	100	GCTGTTGCTGCCCTTCTTTC	60.039	20	100
nSSR_2076	TC	9|C6007064:244-661|+	4|C6100653:326-333|-	4|C5130375:461-468|+	4|C5394802:436-443|+	N/A	N/A	8|C7057614:780-795|-	N/A	2.23	0.38	0.98	TTAAACGTCCAACAGAGAAGAAGGTCCTAGATATTTTCCCACTGTCCCGATTCAGACGAGGGAGTGGAAACCGGATGACCGGATGTTGCCGGTGAGATGATGCAGTACGGCACTCATCAGACCTGTAATTTTTCCGTCTGATTTTTCTCTTATTATATATTCGTACTCTTCTCGCTGATGCCTTCGTGCTCGCGTTCTCG	TGCTACGATCTCCGTCGCCGGCGAGCTTCGAGGTCTTTGCCACTCATCGGTTCCGCGATGGAATGAGCGAAGAGGGAAGAGAAAGCTTAGAGAGGAGGATCGGAGGATCGAAGGTTTCGAAGGATGATGCTCGATCTCAACGAGTGCTCGGCTTCTTTGGAGACGCCGGTGGCGGCAGAGGGCTCTGGGACGTCGGAGTC	GCCGGTGAGATGATGCAGTA	59.895	20	100	100	CCGATGAGTGGCAAAGACCT	60.036	20	100	100	181	287	467	GGATGTTGCCGGTGAGATGA	60.108	20	100	100	CCGATGAGTGGCAAAGACCT	60.036	20	100	100	188	280	467	TGCAGTACGGCACTCATCAG	60.109	20	100	100	CCGATGAGTGGCAAAGACCT	60.036	20	100
nSSR_2077	TC	9|C6138265:708-1125|+	N/A	8|C5199943:565-580|-	11|C5314832:304-325|+	5|C5967179:342-351|+	8|C6389930:1151-1166|-	N/A	N/A	1.94	0.38	1	TGGGAGTGTATATATGTATATTCATAGTCTATTTTGTTTGGGCCCCATATCCAGTAGTGTATACTGCTCATTTGCCTTGCATTTTAAGCAACCTCCTGGATTCACCCTCCTCCTCCTGCACCACTGCACACCATCTTCTACTTCCCAAATGGATCATCATGCAACCACATCTCAGTCCCATGTGAGTTCATCTTTACCTT	TATACATCTCTTTTCCTTCTTCCTTTCCCATTATTGGCAAGAAGAAAACAAGAACACCATCTCTTTCCTTGACCTCCTCCATCATTCCTTCATGGAAAGACAATAACTACTCAACCTCTCTTTCTCTTATGAGTGTGGAGTAATAGTAACAGCTCTCAAGGTAGTTTCATGCTTTTGTTGCTTTTGCTTATGTGTGTGTA	GCAACCACATCTCAGTCCCA	59.963	20	96.25	100	TGGAGGAGGTCAAGGAAAGAGA	60.158	22	100	100	139	360	498	GCAACCACATCTCAGTCCCA	59.963	20	96.25	100	GGAATGATGGAGGAGGTCAAGG	60.159	22	100	100	146	360	505	GCAACCACATCTCAGTCCCA	59.963	20	96.25	100	TGGAGGAGGTCAAGGAAAGAG	58.739	21	100
nSSR_208	AAT	7|C6191456:639-1059|+	N/A	3|C5181105:540-548|+	3|C5386054:629-637|-	N/A	3|C6229274:414-422|+	N/A	3|C5760997:486-494|+	1.6	0.38	0.99	ATCCTGTGCACGAGGATCACCAGATCGTTTTTGGATTCCATACTGCTGGCAGGAAACAACATAAGTGAATTTCATATCAGCAATAGCTTGGCATTGTGCCCACAGAGATCTTCCTGTTTCTGATTGTTCATCAGATGATGATTCAACAGCTTTGTAACCTTGCATAAGATCTGCAAGAAAGCTTCAAGATGAGACAAAGA	AAAAGAAACAAATGGAAATAAAAGTCATGAACAGTAATCATCAAGCATTCATTTCTTAAAAAAGAACTCTATGATAGATACCTTCATCTGAGGCCATGTCAAGAAAGCATTGAAGTTCCAAAGCTTTCCGGTAGTACATCATACCTCTAACTGGCAACTCAAGTTAATCAGATATTTTTATCCAAAAAAAGTCAGATGAC	TCAACAGCTTTGTAACCTTGCA	58.98	22	100	100	TGCTTTCTTGACATGGCCTCA	60.203	21	100	100	188	342	529	TCAACAGCTTTGTAACCTTGCA	58.98	22	100	100	TGACATGGCCTCAGATGAAGG	59.789	21	100	100	180	342	521	TCAACAGCTTTGTAACCTTGCA	58.98	22	100	100	GACATGGCCTCAGATGAAGGT	59.789	21	100
nSSR_2080	TC	9|C6177608:378-795|+	5|C6166945:306-315|-	6|C5316052:345-356|-	8|C5394952:2211-2226|+	10|C5995751:261-280|-	N/A	N/A	N/A	1.85	0.38	0.98	GTTTGTCTTCCATCCGAGGACTCTTGTTGTTTTGTGTCCAGAACCTGAACACCAGATTTTGAAGGTGAGAGAGATTGATTTAGAGATGTAAGGGGAGATCATGGGGTTCAGATTCATTCACCTGGCAAGATGAGAGGGAAAGCACTATGTCTGTGAGAGCTAAGTCTCATTGCCATTGCTGATGAAACCTCAGCCATCTT	TTGGGACTGGCTGGAGTTGGAAGACAGGGATGGAATGTCTGCCACGTAAGTACAAATGGATGGTTGAAGTTGAACTGAGTCTTTTATGTATATGTCCCTGTAACATCACTTAATTATATACTATCTTTAAATTGCAGGTGTTAATGAGTTATCAAAGAGGTTACTCCGGTTCAGTTGATAAATTTATATATGTTAGCCAA	AGGGGAGATCATGGGGTTCA	59.954	20	100	100	GGCAGACATTCCATCCCTGT	59.743	20	100	100	171	290	460	AGGGGAGATCATGGGGTTCA	59.954	20	100	100	GTGGCAGACATTCCATCCCT	59.743	20	100	100	173	290	462	AGGGGAGATCATGGGGTTCA	59.954	20	100	100	CTTCCAACTCCAGCCAGTCC	60.322	20	100
nSSR_2082	TC	9|C6198402:1258-1675|+	8|C6225363:1225-1240|+	N/A	N/A	N/A	8|C6301964:530-545|-	6|C7125570:569-580|+	6|C5751723:1239-1250|-	1.2	0.38	0.98	CAACTTACTGTTTAATTTCTGGCTAAATTCTGATGCAAATAATCCTTTTCCTTCATTCTATCTAATTTCCTTTTGAAGGATGTTTTCAATTGAGGGGAAAGTCTAAGTAAAATGTGGGAAACTGTCTAATTTTATTTGGTAGAATTTACATCGATATGATCTTGCACTTGTCTTTTATCTCCCTGTTTCGTTTCTCTCTT	TATTCAAACATATAGTGGTAGTTGTATGAAGTTGCTTTTGATAGGCGTTGCATTCATTCTAATTCTTGTAATGAATGTGTCAACAAAAGCATAAAGTCAATATTCTTTAGACACAGTGCAGGATTTTTTTTATGTGATGGCAATCCTTACTGTTGCCATTACACCCCTGTTTGTGTACATAAGTTCATATTCTCTTATTT	TGCACTTGTCTTTTATCTCCCTGT	60.202	24	97.9	100	TGCAACGCCTATCAAAAGCA	58.757	20	100	100	108	362	469	GCACTTGTCTTTTATCTCCCTGT	58.672	23	97.85	100	TGCAACGCCTATCAAAAGCA	58.757	20	100	100	107	363	469	TGCACTTGTCTTTTATCTCCCTGT	60.202	24	97.9	100	TGCAACGCCTATCAAAAGCAA	59.389	21	100
nSSR_2083	TC	9|C6198852:1276-1693|+	N/A	8|C5225931:318-333|+	7|C5353730:874-887|+	N/A	9|C6112336:256-273|+	7|C6884290:324-337|-	N/A	0.89	0.38	0.97	GGGCAAGTTTCTCTAAGGCGCTAGAAGGTTCCATCTGAGTTGGTGCTTACTTGGCACCCAAGCAACAACTTGCTTGGCATCCAAGTAATCTCTAACTATCCAATGGCCTACTAGAAGGTATAAAAAAGGTCGAAGAGAGAGAGATCAAGGAGACCTTCTTCTTTGGTCTGGTACCTCTGCCACGAGCCTCAACTCTCTGA	ATGACTCACTTTCCGACCCTTTGATATGGTTTCTTCTCCAAATTCCTTTGAGAGAGACTTTTCTCCTTGATCTCGTTTAGCTGACTTGATGATCGGAGAATCAAGAGAAAGAGCCCGGACTTCCCCTTGAAAAACTCCTCCAATATCAGACTTCATTGGCAGAAGGAATTCTTCTCACCGGAACCATCACCGGTGGTTGA	CCACGAGCCTCAACTCTCTG	60.109	20	100	92.5	GGAAGTCCGGGCTCTTTCTC	60.108	20	100	95	163	379	541	CCACGAGCCTCAACTCTCTG	60.109	20	100	92.5	GTCCGGGCTCTTTCTCTTGA	59.391	20	100	100	159	379	537	CCACGAGCCTCAACTCTCTG	60.109	20	100	92.5	AGTCCGGGCTCTTTCTCTTG	59.389	20	100
nSSR_2085	TC	9|C6216748:2012-2429|+	N/A	N/A	16|C5366840:569-600|+	9|C5856982:458-475|-	8|C6376428:783-798|-	7|C6843624:376-389|-	10|C5750197:781-800|-	2.91	0.25	0.98	GACCATTTACCTTACTAACAAGACAATTTGGAGTCTTTCATAGAAAGAGAGATGAGAGAGAGATTGTGTCAAGTTTCTCCTCAAATCACTGATTGTGTCCCTTGTCTCCCATAATTCTGTCTTTTAACTATTCATTACTCAATTTAATACCATCACCATCACTTTCACCTCTTTACTTTGCTTCTCTCTTTCTCTGTCTG	TGTACATATCTCTCATGTTCGCATTCATGGTTGCGTGTGTCAGGACTTATGTTTGTTTGAATATATATGAACTAGTCTTCTTCATATATGGGTGTGAAATGGTAGATACTTGATAGTGTGACATGTGTCCATTCATCTACTTGTACTTAATTATATCTCTGCTATATATTTTTATTGCTGAGATGATCATATATATTAGT	GATTGTGTCCCTTGTCTCCCA	59.649	21	100	100	ACACACGCAACCATGAATGC	60.039	20	100	100	168	290	457	TTGTGTCCCTTGTCTCCCAT	58.555	20	100	100	ACACACGCAACCATGAATGC	60.039	20	100	100	166	292	457	ATTGTGTCCCTTGTCTCCCA	58.555	20	100	100	ACACACGCAACCATGAATGC	60.039	20	100
nSSR_2087	TCA	5|C6167801:101-515|+	5|C6139415:347-361|+	5|C5328216:1336-1350|+	N/A	5|C6085191:1450-1464|-	N/A	3|C6943860:243-251|-	N/A	0.8	0.38	0.98	TGGTTTCTCATCTGCAAAAAGAGGCATTAACATGGAAAACACACAAACACTCAACAAACAGAAATGAAAACTCATTCAACTGTATAGAACAAAGAAGCATGTGCACCTTCATCTGCATAGAACACAAGAATCAGGACCAAACAAACAAGCGTACCTCTAAAGTAGGAACTGAATTATATATATGCACTTCATCATCATCG	ATCAATATGAACTCGGGCGAGCTCCTCACGGAATTAGAAGCTGGTGGCCGTCCCTTCCATAAGGAAGAGGAAGACAGCCCAAGCCTAAGCTCAAGATCATGACTTGCTCTGTTCATCCCTTTAAGAACAGCCCCATAATTGGATCCACATACAATCGAATACGGAAAATCAAACAGATCAACGCGCGCGTGAAAGGAACA	GCATGTGCACCTTCATCTGC	60.179	20	100	100	GACGGCCACCAGCTTCTAAT	60.108	20	100	100	171	196	366	GCATGTGCACCTTCATCTGC	60.179	20	100	100	TGGGCTGTCTTCCTCTTCCT	60.179	20	100	100	200	196	395	GCATGTGCACCTTCATCTGC	60.179	20	100	100	GAGCTCGCCCGAGTTCATAT	59.684	20	100
nSSR_2088	TCA	5|C6206932:585-999|+	5|C5898516:306-320|-	N/A	6|C5382306:1210-1227|-	5|C6006343:821-835|-	5|C6365676:1024-1038|-	4|C6746111:296-307|+	N/A	0.58	0.25	0.99	AAACAGTACATCATGCCTAACACAAATACAACATGCATTGATCATTCATATTCATTAACATTCAAAGAAGAGACTTGAGTGACCTAGCCTTGATCTTCTTCCTCCCTCTCTTCCTACTCCCAACTCCAACCTCAACCTCTTGATCACCATCATCATCTTCATCATTGTCATGATCATCATTATCATTATCATAAACATCT	TCTTCTTCGTCTTCTTCGACATTCTCCTTCTTCGCAACCTCAACATTATCTCCACTACTCCTCTTCTTCCCCCTCCACGGGCCGAACCCCGAATAATAGTAGAAGTCGGAACCCGTATCACGGGTACTCGTCCTCCGTTTCCGGCCTCTGGCAGCTGCCCCGGTCACCGGAGCTCGATACGCGGCATTGTAAGCTCTGAG	TCCCAACTCCAACCTCAACC	59.523	20	100	100	TGTTGAGGTTGCGAAGAAGGA	59.86	21	100	100	143	317	459	CCCAACTCCAACCTCAACCT	59.521	20	100	100	TGTTGAGGTTGCGAAGAAGGA	59.86	21	100	100	142	318	459	TCCCAACTCCAACCTCAACC	59.523	20	100	100	TGAGGTTGCGAAGAAGGAGA	58.662	20	100
nSSR_2089	TCA	5|C6207792:720-1134|+	N/A	5|C5303772:918-932|+	5|C5191590:374-388|-	5|C5932057:206-220|-	N/A	4|C6994020:351-362|+	N/A	0.4	0.38	1	CAAGTGTGAATGCATGATGAAGGACAAAATGGCTAATTGAGTCTTCGTACTATAGACTGAATGGATAGTTTTAAATTGTCTTATTTTACCAGAAAGAAACAAAAAAGATAAATGAACAACGATAACCAAGAGATGGAGTAAACTATTAAGAACAGGTGCACTCTCACACTAGTATTGCATAACTCGATAGAATTAAAATC	CATAACTAATTTATAGTTATGTATAGCAGCATCTGAATTCTGAACAAAGGAATTGCATTTAGTGAAGCAACATGCTCTGTAAATACATTTGACATTAGAGCATATGGCAGAGAAAGATGGAGCCAGAAAAATTGCTTATGAGCATTTGTCCATTTGAAGGTAATGTAGAGTACAAGCACCATTTGAAGGTAATGTATAAT	AACAGGTGCACTCTCACACT	59.167	20	100	100	GGCTCCATCTTTCTCTGCCA	59.746	20	100	100	189	350	538	AGAACAGGTGCACTCTCACA	58.877	20	100	100	GGCTCCATCTTTCTCTGCCA	59.746	20	100	100	191	348	538	GAACAGGTGCACTCTCACACT	60.203	21	100	100	GGCTCCATCTTTCTCTGCCA	59.746	20	100
[truncated: 499 more rows]
[truncated: 4 more columns]

## Sheet: Sheet2
AC	2
AC	2
AC	2
AC	2
AC	2
AC	2
AC	2
AC	2
AC	2
AC	2
AC	2
AC	2
AC	2
AC	2
AC	2
AC	2
AC	2
AC	2
AC	2
AC	2
AC	2
AC	2
AC	2
AC	2
AC	2
AC	2
AC	2
AC	2
AC	2
AC	2
AC	2
AC	2
AC	2
AC	2
AC	2
AC	2
AG	2
AG	2
AG	2
AG	2
AG	2
AG	2
AG	2
AG	2
AG	2
AG	2
AG	2
AG	2
AG	2
AG	2
AG	2
AG	2
AG	2
AG	2
AG	2
AG	2
AG	2
AG	2
AG	2
AG	2
AG	2
AG	2
AG	2
AG	2
AG	2
AG	2
AG	2
AG	2
AG	2
AG	2
AG	2
AG	2
AG	2
AG	2
AG	2
AG	2
[truncated: 912 more rows]
